# Supplementary material for: Rational design of minimal synthetic promoters for plants
Source: PubMed Central journal article supplement (PMC7708054; doi:10.1093/nar/gkaa682), 2020-08-28

**Supplementary Data 1.** Table of all Minimal Synthetic Promoters (MinSyns) tested in this study. Sequence-variants of cis-regulatory elements (CREs) predicted to bind the same class of transcription factors (TFs) are identified by a subscript numerator (e.g. 3 x bHLH<sub>1</sub> and 3 x bHLH<sub>2</sub>). Some CREs consist of multiple, overlapping TF binding sites indicated by a "+" followed by a list of all TFs predicted to bind to that CRE in parentheses (e.g. C2C2dof<sub>2</sub>/C2C2dof+MADS+Orphan+REM). Multiple CREs within in the same MinSyn are separated by ".". Asterisks (\*) indicate that the MinSyn sequence is split into multiple Level 0 plasmids (e.g. distal, proximal and core regions), which are co-assembled into the expression construct.

| Name       | CREs in Var region                                               | Description                                 | Length (bp) | Link to sequence                                                                                                | Plasmid Code (Level 0 Phytobrick) | Plasmid Code (Expression Cassette) |
|------------|------------------------------------------------------------------|---------------------------------------------|-------------|-----------------------------------------------------------------------------------------------------------------|-----------------------------------|------------------------------------|
| MinSyn_000 | NONE                                                             | Control MinSyn (no CREs in variable region) | 93          | <a href="https://benchling.com/s/seq-0qgOE70PINhTINI5bHiB">https://benchling.com/s/seq-0qgOE70PINhTINI5bHiB</a> | pEPYC0CM0035                      | pEPYC1CB0007                       |
| MinSyn_001 | 3 x bHLH <sub>1</sub>                                            | three copies of a single CRE                | 107         | <a href="https://benchling.com/s/seq-wZFNbyhVnAZN2L4976N">https://benchling.com/s/seq-wZFNbyhVnAZN2L4976N</a>   | pEPYC0CM0366                      | pEPYC1CB0426                       |
| MinSyn_002 | 3 x bZIP                                                         | three copies of a single CRE                | 116         | <a href="https://benchling.com/s/seq-1EFNTdKRRpJThkYw2sDh">https://benchling.com/s/seq-1EFNTdKRRpJThkYw2sDh</a> | pEPYC0CM0367                      | pEPYC1CB0427                       |
| MinSyn_003 | 3 x AP2 <sub>+</sub> (TCP)                                       | three copies of a single CRE                | 150         | <a href="https://benchling.com/s/seq-FgX1DQI9OQ9r6nHEfu0">https://benchling.com/s/seq-FgX1DQI9OQ9r6nHEfu0</a>   | pEPYC0CM0368                      | pEPYC1CB0428                       |
| MinSyn_004 | 3 x C2C2dof <sub>2</sub> (C2C2dof+MADS+Orphan+REM)               | three copies of a single CRE                | 161         | <a href="https://benchling.com/s/seq-le8CjZ1fGHECHX2DEb">https://benchling.com/s/seq-le8CjZ1fGHECHX2DEb</a>     | pEPYC0CM0379                      | pEPYC1CB0439                       |
| MinSyn_005 | 3 x TCP <sub>2</sub>                                             | three copies of a single CRE                | 113         | <a href="https://benchling.com/s/seq-k6tmMv8g91T31MmRcyu">https://benchling.com/s/seq-k6tmMv8g91T31MmRcyu</a>   | pEPYC0CM0380                      | pEPYC1CB0440                       |
| MinSyn_006 | 3 x MYB+ (MYB+c2c2gata+C3H)                                      | three copies of a single CRE                | 167         | <a href="https://benchling.com/s/seq-YWwJ0E1fSpbn0D6zcfI">https://benchling.com/s/seq-YWwJ0E1fSpbn0D6zcfI</a>   | pEPYC0CM0381                      | pEPYC1CB0441                       |
| MinSyn_007 | 3 x C2H2+ (C2H2+C3H+GeBP)                                        | three copies of a single CRE                | 104         | <a href="https://benchling.com/s/seq-CqGe4PaJqf5EVxmf63YM">https://benchling.com/s/seq-CqGe4PaJqf5EVxmf63YM</a> | pEPYC0CM0372                      | pEPYC1CB0432                       |
| MinSyn_008 | 3 x C2C2dof <sub>1</sub> (C2C2dof+TCP+NAC)                       | three copies of a single CRE                | 119         | <a href="https://benchling.com/s/seq-Gu0h6I0Vfgk09wq4Ooic">https://benchling.com/s/seq-Gu0h6I0Vfgk09wq4Ooic</a> | pEPYC0CM0373                      | pEPYC1CB0433                       |
| MinSyn_009 | 3 x RWPRK <sub>1</sub>                                           | three copies of a single CRE                | 119         | <a href="https://benchling.com/s/seq-4DyhtKMS4TR0z8O4t">https://benchling.com/s/seq-4DyhtKMS4TR0z8O4t</a>       | pEPYC0CM0374                      | pEPYC1CB0434                       |
| MinSyn_010 | 3 x bHLH <sub>2</sub>                                            | three copies of a single CRE                | 113         | <a href="https://benchling.com/s/seq-F3OqIBKFWw0p5Ue40ZF1">https://benchling.com/s/seq-F3OqIBKFWw0p5Ue40ZF1</a> | pEPYC0CM0385                      | pEPYC1CB0445                       |
| MinSyn_011 | 3 x bHLH+                                                        | three copies of a single CRE                | 158         | <a href="https://benchling.com/s/seq-Lf2OvoC3FHuWrfDtdO3z">https://benchling.com/s/seq-Lf2OvoC3FHuWrfDtdO3z</a> | pEPYC0CM0386                      | pEPYC1CB0446                       |
| MinSyn_012 | 3 x WRKY+ (C2C2dof+WRKY+ABI3VP1+RWPRK+CP+P+C2H2+Orphan+REM+ARID) | three copies of a single CRE                | 182         | <a href="https://benchling.com/s/seq-PSxIzVz6gCLbq50TCnl">https://benchling.com/s/seq-PSxIzVz6gCLbq50TCnl</a>   | pEPYC0CM0387                      | pEPYC1CB0447                       |
| MinSyn_013 | 3 x C2H2                                                         | three copies of a single CRE                | 107         | <a href="https://benchling.com/s/seq-9Qmk9BuaKbdfHq2BtW6">https://benchling.com/s/seq-9Qmk9BuaKbdfHq2BtW6</a>   | pEPYC0CM0390                      | pEPYC1CB0450                       |
| MinSyn_014 | 3 x Homeobox                                                     | three copies of a single CRE                | 113         | <a href="https://benchling.com/s/seq-wHkZrqd5FzLVBsI82wd">https://benchling.com/s/seq-wHkZrqd5FzLVBsI82wd</a>   | pEPYC0CM0391                      | pEPYC1CB0451                       |
| MinSyn_015 | 3 x G2like+ (G2like+ABI3VP1+NAC)                                 | three copies of a single CRE                | 116         | <a href="https://benchling.com/s/seq-de11VZwJhuE9NySaMs7">https://benchling.com/s/seq-de11VZwJhuE9NySaMs7</a>   | pEPYC0CM0392                      | pEPYC1CB0452                       |
| MinSyn_016 | 3 x RWPRK <sub>2</sub>                                           | three copies of a single CRE                | 131         | <a href="https://benchling.com/s/seq-OGYnTcMdmkvb2WEWlHsQ">https://benchling.com/s/seq-OGYnTcMdmkvb2WEWlHsQ</a> | pEPYC0CM0375                      | pEPYC1CB0435                       |
| MinSyn_017 | 3 x WRKY                                                         | three copies of a single CRE                | 122         | <a href="https://benchling.com/s/seq-Ptw5qtT6I7qAcuVQWg7q">https://benchling.com/s/seq-Ptw5qtT6I7qAcuVQWg7q</a> | pEPYC0CM0376                      | pEPYC1CB0436                       |
| MinSyn_018 | 3 x DBP                                                          | three copies of a single CRE                | 119         | <a href="https://benchling.com/s/seq-PSPzNnkut5U9SK6J00">https://benchling.com/s/seq-PSPzNnkut5U9SK6J00</a>     | pEPYC0CM0377                      | pEPYC1CB0437                       |
| MinSyn_019 | 3 x MADS <sub>2</sub> (MADS+C2C2gata)                            | three copies of a single CRE                | 146         | <a href="https://benchling.com/s/seq-B90bPiQWht5tHuhS89N">https://benchling.com/s/seq-B90bPiQWht5tHuhS89N</a>   | pEPYC0CM0382                      | pEPYC1CB0442                       |
| MinSyn_020 | 3 x TCP <sub>3</sub>                                             | three copies of a single CRE                | 119         | <a href="https://benchling.com/s/seq-V34uXQ5ySxNzGn0qLob">https://benchling.com/s/seq-V34uXQ5ySxNzGn0qLob</a>   | pEPYC0CM0383                      | pEPYC1CB0443                       |
| MinSyn_021 | 3 x G2like                                                       | three copies of a single CRE                | 113         | <a href="https://benchling.com/s/seq-N6u8ZGf94wXLTNUbYn">https://benchling.com/s/seq-N6u8ZGf94wXLTNUbYn</a>     | pEPYC0CM0384                      | pEPYC1CB0444                       |
| MinSyn_022 | 3 x AP2+ (AP2+LOBAS2)                                            | three copies of a single CRE                | 152         | <a href="https://benchling.com/s/seq-lbRApeJR28SUD6pQg99w">https://benchling.com/s/seq-lbRApeJR28SUD6pQg99w</a> | pEPYC0CM0393                      | pEPYC1CB0453                       |
| MinSyn_023 | 3 x C-CRE                                                        | three copies of a single CRE                | 140         | <a href="https://benchling.com/s/seq-PH818sWZDkwe5LkP1MS">https://benchling.com/s/seq-PH818sWZDkwe5LkP1MS</a>   | pEPYC0CM0365                      | pEPYC1CB0425                       |
| MinSyn_024 | bHLH <sub>1</sub> /bZIP/AP2 <sub>+</sub>                         | three different CREs                        | 122         | <a href="https://benchling.com/s/seq-Pdin3HP2AviGfrDnB60">https://benchling.com/s/seq-Pdin3HP2AviGfrDnB60</a>   | pEPYC0CM0431                      | pEPYC1CB0493                       |
| MinSyn_026 | C2C2dof <sub>2</sub> /TCP <sub>2</sub> /MYB+                     | three different CREs                        | 144         | <a href="https://benchling.com/s/seq-HT8QBHTic0aUofyzNtH">https://benchling.com/s/seq-HT8QBHTic0aUofyzNtH</a>   | pEPYC0CM0435                      | pEPYC1CB0497                       |
| MinSyn_027 | C2H2+C2C2dof <sub>1</sub> /RWPRK <sub>1</sub>                    | three different CREs                        | 111         | <a href="https://benchling.com/s/seq-SUOKJZKdhdh0420130i">https://benchling.com/s/seq-SUOKJZKdhdh0420130i</a>   | pEPYC0CM0433                      | pEPYC1CB0495                       |
| MinSyn_028 | bHLH <sub>2</sub> /bHLH+/WRKY+                                   | three different CREs                        | 148         | <a href="https://benchling.com/s/seq-3JYJRKjju0EQ0F8e36">https://benchling.com/s/seq-3JYJRKjju0EQ0F8e36</a>     | pEPYC0CM0437                      | pEPYC1CB0499                       |
| MinSyn_029 | C2H2/Homeobox/G2like+                                            | three different CREs                        | 109         | <a href="https://benchling.com/s/seq-0tR8wRGtga3dWw2ojdUw">https://benchling.com/s/seq-0tR8wRGtga3dWw2ojdUw</a> | pEPYC0CM0439                      | pEPYC1CB0501                       |
| MinSyn_030 | RWPRK <sub>2</sub> /WRKY+/DBP                                    | three different CREs                        | 121         | <a href="https://benchling.com/s/seq-QzeRW1REYLnpxLKTQ8K5">https://benchling.com/s/seq-QzeRW1REYLnpxLKTQ8K5</a> | pEPYC0CM0434                      | pEPYC1CB0496                       |
| MinSyn_031 | MADS <sub>2</sub> /TCP <sub>2</sub> /G2like                      | three different CREs                        | 149         | <a href="https://benchling.com/s/seq-cjnH9arWtL87HofR8p2">https://benchling.com/s/seq-cjnH9arWtL87HofR8p2</a>   | pEPYC0CM0436                      | pEPYC1CB0498                       |
| MinSyn_032 | Homeobox/G2like/AP2 <sub>+</sub>                                 | three different CREs                        | 122         | <a href="https://benchling.com/s/seq-qOrS1Nh113sknYWY7ZE">https://benchling.com/s/seq-qOrS1Nh113sknYWY7ZE</a>   | pEPYC0CM0440                      | pEPYC1CB0502                       |
| MinSyn_033 | 1 x C-CRE                                                        | single copy of the C-CRE                    | 96          | <a href="https://benchling.com/s/seq-e1nuS2zS2ZysudP567Jh">https://benchling.com/s/seq-e1nuS2zS2ZysudP567Jh</a> | pEPYC0CM0041                      | pEPYC1CB0079                       |
| MinSyn_034 | AP2 <sub>+</sub> /bZIP/bHLH <sub>1</sub> /C-CRE                  | three different CREs + C-CRE                | 199         | <a href="https://benchling.com/s/seq-esQkM6GtTF3qAOAqND">https://benchling.com/s/seq-esQkM6GtTF3qAOAqND</a>     | pEPYC0CM0310                      | pEPYC1CB0352                       |
| MinSyn_035 | AP2 <sub>+</sub> /bZIP/bHLH <sub>1</sub> /C-CRE                  | 25 bp between CREs and TATA                 | 224         | <a href="https://benchling.com/s/seq-AvdnsDcbLSTGoydoVsOf">https://benchling.com/s/seq-AvdnsDcbLSTGoydoVsOf</a> | pEPYC0CM0312                      | pEPYC1CB0354                       |
| MinSyn_036 | AP2 <sub>+</sub> /bZIP/bHLH <sub>1</sub> /C-CRE                  | 50 bp between CREs and TATA                 | 249         | <a href="https://benchling.com/s/seq-i6VT6WeKtnr5SauKJDR2">https://benchling.com/s/seq-i6VT6WeKtnr5SauKJDR2</a> | pEPYC0CM0313                      | pEPYC1CB0355                       |
| MinSyn_037 | AP2 <sub>+</sub> /bZIP/bHLH <sub>1</sub> /C-CRE                  | 75 bp between CREs and TATA                 | 274         | <a href="https://benchling.com/s/seq-gskfrYVYdC3FivEOL8z">https://benchling.com/s/seq-gskfrYVYdC3FivEOL8z</a>   | pEPYC0CM0314                      | pEPYC1CB0356                       |
| MinSyn_038 | MYB+/C2C2dof <sub>1</sub> /TCP <sub>2</sub> /C-CRE               | three different CREs + C-CRE                | 232         | <a href="https://benchling.com/s/seq-apzE3SCGRK74bHdhJvS">https://benchling.com/s/seq-apzE3SCGRK74bHdhJvS</a>   | pEPYC0CM0225                      | pEPYC1CB0269                       |
| MinSyn_039 | MYB+/C2C2dof <sub>1</sub> /TCP <sub>2</sub> /C-CRE               | 25 bp between CREs and TATA                 | 241         | <a href="https://benchling.com/s/seq-Eu3N44XhQDjBShC3Ovb">https://benchling.com/s/seq-Eu3N44XhQDjBShC3Ovb</a>   | pEPYC0CM0209                      | pEPYC1CB0253                       |
| MinSyn_040 | MYB+/C2C2dof <sub>1</sub> /TCP <sub>2</sub> /C-CRE               | 50 bp between CREs and TATA                 | 266         | <a href="https://benchling.com/s/seq-3ghoZvi65XWYie06FCb">https://benchling.com/s/seq-3ghoZvi65XWYie06FCb</a>   | pEPYC0CM0210                      | pEPYC1CB0254                       |
| MinSyn_041 | MYB+/C2C2dof <sub>1</sub> /TCP <sub>2</sub> /C-CRE               | 75 bp between CREs and TATA                 | 291         | <a href="https://benchling.com/s/seq-LGRcpftG1qJmZj67PFb">https://benchling.com/s/seq-LGRcpftG1qJmZj67PFb</a>   | pEPYC0CM0211                      | pEPYC1CB0255                       |
| MinSyn_042 | C-CRE/Homeobox/C2H2                                              | two different CREs + C-CRE                  | 158         | <a href="https://benchling.com/s/seq-Mjqku0WBvSi1v13zqV">https://benchling.com/s/seq-Mjqku0WBvSi1v13zqV</a>     | pEPYC0CM0311                      | pEPYC1CB0353                       |
| MinSyn_043 | C-CRE/Homeobox/C2H2                                              | 25 bp between CREs and TATA                 | 182         | <a href="https://benchling.com/s/seq-IlYzHCBO6XzLOE1z0wj">https://benchling.com/s/seq-IlYzHCBO6XzLOE1z0wj</a>   | pEPYC0CM0212                      | pEPYC1CB0256                       |
| MinSyn_044 | C-CRE/Homeobox/C2H2                                              | 50 bp between CREs and TATA                 | 207         | <a href="https://benchling.com/s/seq-qu6hTPHmly538zhUWBue">https://benchling.com/s/seq-qu6hTPHmly538zhUWBue</a> | pEPYC0CM0213                      | pEPYC1CB0257                       |
| MinSyn_045 | C-CRE/Homeobox/C2H2                                              | 75 bp between CREs and TATA                 | 232         | <a href="https://benchling.com/s/seq-apzE3SCGRK74bHdhJvS">https://benchling.com/s/seq-apzE3SCGRK74bHdhJvS</a>   | pEPYC0CM0214                      | pEPYC1CB0258                       |
| MinSyn_046 | AP2 <sub>+</sub> /bZIP/bHLH <sub>1</sub> /C-CRE                  | three different CREs + C-CRE                | 147         | <a href="https://benchling.com/s/seq-TBv49lqInULaRzRzA6z7">https://benchling.com/s/seq-TBv49lqInULaRzRzA6z7</a> | pEPYC0CM0182                      | pEPYC1CB0187                       |
| MinSyn_048 | AP2 <sub>+</sub> /bZIP/bHLH <sub>1</sub> /C-CRE                  | Random flanking sequence between CREs       | 203         | <a href="https://benchling.com/s/seq-m70LnNmMxibPARIVXdtq">https://benchling.com/s/seq-m70LnNmMxibPARIVXdtq</a> | pEPYC0CM0395                      | pEPYC1CB0455                       |
| MinSyn_049 | AP2 <sub>+</sub> /bZIP/bHLH <sub>1</sub> /C-CRE                  | Random flanking sequence between CREs       | 203         | <a href="https://benchling.com/s/seq-hKf7cEnrzRi7ZvmT8TQH">https://benchling.com/s/seq-hKf7cEnrzRi7ZvmT8TQH</a> | pEPYC0CM0396                      | pEPYC1CB0456                       |
| MinSyn_050 | bZIP/C-CRE/bHLH <sub>1</sub> /AP2 <sub>+</sub>                   | three different CREs + C-CRE                | 143         | <a href="https://benchling.com/s/seq-JYXcbEXuLjUG4vRS6Sa">https://benchling.com/s/seq-JYXcbEXuLjUG4vRS6Sa</a>   | pEPYC0CM0451                      | pEPYC1CB0509                       |
| MinSyn_051 | bHLH <sub>1</sub> /AP2 <sub>+</sub> /C-CRE/bZIP                  | three different CREs + C-CRE                | 143         | <a href="https://benchling.com/s/seq-4ysOth08lwm4Gza4KvA">https://benchling.com/s/seq-4ysOth08lwm4Gza4KvA</a>   | pEPYC0CM0452                      | pEPYC1CB0510                       |
| MinSyn_052 | MYB+/C2C2dof <sub>1</sub> /TCP <sub>2</sub> /C-CRE               | three different CREs + C-CRE                | 169         | <a href="https://benchling.com/s/seq-84vUPFSvAKnF4Hlawf2">https://benchling.com/s/seq-84vUPFSvAKnF4Hlawf2</a>   | pEPYC0CM0183                      | pEPYC1CB0188                       |
| MinSyn_054 | MYB+/C2C2dof <sub>1</sub> /TCP <sub>2</sub> /C-CRE               | Random flanking sequence between CREs       | 226         | <a href="https://benchling.com/s/seq-16dbTNGnrcGBQ98PC2fq">https://benchling.com/s/seq-16dbTNGnrcGBQ98PC2fq</a> | pEPYC0CM0397                      | pEPYC1CB0457                       |
| MinSyn_055 | MYB+/C2C2dof <sub>1</sub> /TCP <sub>2</sub> /C-CRE               | Random flanking sequence between CREs       | 226         | <a href="https://benchling.com/s/seq-SLE1so0KdCvy4Ceg2GoO">https://benchling.com/s/seq-SLE1so0KdCvy4Ceg2GoO</a> | pEPYC0CM0398                      | pEPYC1CB0458                       |
| MinSyn_056 | TCP <sub>2</sub> /MYB+/C-CRE/C2C2dof <sub>2</sub>                | three different CREs + C-CRE                | 166         | <a href="https://benchling.com/s/seq-p5YhEx6oyBXs2JEIHpq">https://benchling.com/s/seq-p5YhEx6oyBXs2JEIHpq</a>   | pEPYC0CM0453                      | pEPYC1CB0511                       |
| MinSyn_057 | C2C2dof <sub>2</sub> /TCP <sub>2</sub> /MYB+/C-CRE               | three different CREs + C-CRE                | 166         | <a href="https://benchling.com/s/seq-cTjP9K65UEBrXAVDv6pp">https://benchling.com/s/seq-cTjP9K65UEBrXAVDv6pp</a> | pEPYC0CM0454                      | pEPYC1CB0512                       |
| MinSyn_058 | C-CRE/Homeobox/C2H2                                              | two different CREs + C-CRE                  | 120         | <a href="https://benchling.com/s/seq-QSCATVwH0gJ3UgP2JCX">https://benchling.com/s/seq-QSCATVwH0gJ3UgP2JCX</a>   | pEPYC0CM0184                      | pEPYC1CB0189                       |
| MinSyn_060 | C-CRE/Homeobox/C2H2                                              | Random flanking sequence between CREs       | 159         | <a href="https://benchling.com/s/seq-mGTHb9picAMIRJRPbW">https://benchling.com/s/seq-mGTHb9picAMIRJRPbW</a>     | pEPYC0CM0401                      | pEPYC1CB0461                       |
| MinSyn_061 | C-CRE/Homeobox/C2H2                                              | Random flanking sequence between CREs       | 159         | <a href="https://benchling.com/s/seq-0jbsHEj0CNtV17B8JPE">https://benchling.com/s/seq-0jbsHEj0CNtV17B8JPE</a>   | pEPYC0CM0402                      | pEPYC1CB0462                       |
| MinSyn_062 | C2H2/Homeobox/C-CRE                                              | two different CREs + C-CRE                  | 117         | <a href="https://benchling.com/s/seq-i7GRR4HRQvNR00gv1Ty">https://benchling.com/s/seq-i7GRR4HRQvNR00gv1Ty</a>   | pEPYC0CM0455                      | pEPYC1CB0513                       |
| MinSyn_063 | Homeobox/C-CRE/C2H2                                              | two different CREs + C-CRE                  | 117         | <a href="https://benchling.com/s/seq-ayco6IU97fWxfMmb9Gp">https://benchling.com/s/seq-ayco6IU97fWxfMmb9Gp</a>   | pEPYC0CM0456                      | pEPYC1CB0514                       |
| MinSyn_064 | 1 x TALE AvrXa27 binding site                                    | Binding site for synthetic TF               | 88          | <a href="https://benchling.com/s/seq-MkgA2Y0Aajmr7xhfPyBJ">https://benchling.com/s/seq-MkgA2Y0Aajmr7xhfPyBJ</a> | pEPAS0CMR0015                     | pEPKCa2rKN0010/                    |
| MinSyn_065 | 2 x TALE AvrXa27 binding sites                                   | Binding site for synthetic TF               | 126         | <a href="https://benchling.com/s/seq-slokOMWDRAXfmgQNsJn">https://benchling.com/s/seq-slokOMWDRAXfmgQNsJn</a>   | pEPAS0CMR0016                     | pEPKCa2rKN0009/                    |
| MinSyn_066 | 4 x TALE AvrXa27 binding sites                                   | Binding site for synthetic TF               | 202         | <a href="https://benchling.com/s/seq-gDZy0e6mWzsvrg0r0n">https://benchling.com/s/seq-gDZy0e6mWzsvrg0r0n</a>     | pEPKCa2rKN0010                    | pEPKCa2rKN0009/                    |
| MinSyn_067 | 2 x $\phi$ C3 binding sites                                      | Binding site for synthetic TF               | 242         | <a href="https://benchling.com/s/seq-fgzQewCH5v3GFCEkiG">https://benchling.com/s/seq-fgzQewCH5v3GFCEkiG</a>     | pEPKCa2rKN0009                    | pEPKCa2rKN0009/                    |
| MinSyn_068 | 4 x $\phi$ C3 binding sites                                      | Binding site for synthetic TF               | 360         | <a href="https://benchling.com/s/seq-40a3QQRnQ7uywEow0mDl">https://benchling.com/s/seq-40a3QQRnQ7uywEow0mDl</a> | pEPKCa2rKN0009 +                  | pEPKCa2rKN0010                     |
|            |                                                                  |                                             |             | <a href="https://benchling.com/s/seq-JioHeeBtaPHTH6h1YVs4">https://benchling.com/s/seq-JioHeeBtaPHTH6h1YVs4</a> | pEPKCa2rKN011*                    | pEPKCa2rKN0101                     |

| Name       | CREs in Var region                                                                                                                               | Description                   | Length (bp) | Link to sequence                                                                                                                                                                                                                                                                                                                                  | Plasmid Code (Level 0 Phytobrick)           | Plasmid Code (Expression cassette)       |
|------------|--------------------------------------------------------------------------------------------------------------------------------------------------|-------------------------------|-------------|---------------------------------------------------------------------------------------------------------------------------------------------------------------------------------------------------------------------------------------------------------------------------------------------------------------------------------------------------|---------------------------------------------|------------------------------------------|
| MinSyn_069 | 6 x $\phi$ C3 binding sites                                                                                                                      | Binding site for synthetic TF | 478         | <a href="https://benchling.com/s/seq-NpXSAIIWwDqevLWFFst">https://benchling.com/s/seq-NpXSAIIWwDqevLWFFst</a><br><a href="https://benchling.com/s/seq-aoVmB0w0bGZJpfb4zu4">https://benchling.com/s/seq-aoVmB0w0bGZJpfb4zu4</a><br><a href="https://benchling.com/s/seq-JioHeeBtqPHTH6h1YVs4">https://benchling.com/s/seq-JioHeeBtqPHTH6h1YVs4</a> | pEPKK0cm0063 + pEPKK0CM0064 + pEPKK0CM0111* | pEPKk02KN0102/pEPYCa1KN0003              |
| MinSyn_101 | bHLH <sub>2</sub> /bHLH <sub>1</sub> /AP2 <sub>+</sub> /Homeobox/WRKY                                                                            | computationally designed      | 274         | <a href="https://benchling.com/s/seq-4DGAeUNIAqGYKpgxFpuE">https://benchling.com/s/seq-4DGAeUNIAqGYKpgxFpuE</a>                                                                                                                                                                                                                                   | pEPYC0CM0407                                | pEPYC1CB0467                             |
| MinSyn_102 | C2C2dof+/AP2 <sub>+</sub> /WRKY                                                                                                                  | computationally designed      | 208         | <a href="https://benchling.com/s/seq-8filNn13Fn41xS0R1NwAa">https://benchling.com/s/seq-8filNn13Fn41xS0R1NwAa</a>                                                                                                                                                                                                                                 | pEPYC0CM0408                                | pEPYC1CB0468                             |
| MinSyn_103 | bHLH <sub>1</sub> /MYB+                                                                                                                          | computationally designed      | 149         | <a href="https://benchling.com/s/seq-viwbvFSEnd3wupQtCuh8">https://benchling.com/s/seq-viwbvFSEnd3wupQtCuh8</a>                                                                                                                                                                                                                                   | pEPYC0CM0409                                | pEPYC1CB0469                             |
| MinSyn_104 | RWPRK <sub>1</sub> /CCAAT+/HSF+/MADS+/AP2 <sub>+</sub> /G2like/DBP/C-CRE/MYB+                                                                    | computationally designed      | 417         | <a href="https://benchling.com/s/seq-UkP4FqWF5RxWyr0d4wNf">https://benchling.com/s/seq-UkP4FqWF5RxWyr0d4wNf</a>                                                                                                                                                                                                                                   | pEPYC0CM0410                                | pEPYC1CB0470                             |
| MinSyn_105 | bZIP/C-CRE/Homeobox/MYB+/C-CRE                                                                                                                   | computationally designed      | 272         | <a href="https://benchling.com/s/seq-OeJ5B32kVlqfCwcM449w">https://benchling.com/s/seq-OeJ5B32kVlqfCwcM449w</a>                                                                                                                                                                                                                                   | pEPYC0CM0411                                | pEPYC1CB0471                             |
| MinSyn_106 | C-CRE/AP2 <sub>+</sub> /HSF+/C2C2dof <sub>+</sub> /CCAAT+/C-CRE                                                                                  | computationally designed      | 330         | <a href="https://benchling.com/s/seq-MzLsjqJf4Wk33AQyMV5N">https://benchling.com/s/seq-MzLsjqJf4Wk33AQyMV5N</a>                                                                                                                                                                                                                                   | pEPYC0CM0412                                | pEPYC1CB0472                             |
| MinSyn_107 | RWPRK <sub>2</sub> /C-CRE/WRKY/G2like+/C-CRE                                                                                                     | computationally designed      | 247         | <a href="https://benchling.com/s/seq-kbeGUgNkVrNfb80nFY2">https://benchling.com/s/seq-kbeGUgNkVrNfb80nFY2</a>                                                                                                                                                                                                                                     | pEPYC0CM0413                                | pEPYC1CB0473                             |
| MinSyn_108 | bHLH <sub>1</sub> /C2H2/AP2 <sub>+</sub> /AP2 <sub>+</sub> /Homeobox/C-CRE                                                                       | computationally designed      | 272         | <a href="https://benchling.com/s/seq-PLJyq4WT8G03wG3gQY8o">https://benchling.com/s/seq-PLJyq4WT8G03wG3gQY8o</a>                                                                                                                                                                                                                                   | pEPYC0CM0414                                | pEPYC1CB0474/pEPYCa1KN0002/pEPYCa1KN0007 |
| MinSyn_109 | bHLH <sub>1</sub> /C-CRE/MYB+/C-CRE                                                                                                              | computationally designed      | 224         | <a href="https://benchling.com/s/seq-vH4V5K7vNg2X7tWdIGy4">https://benchling.com/s/seq-vH4V5K7vNg2X7tWdIGy4</a>                                                                                                                                                                                                                                   | pEPYC0CM0415                                | pEPYC1CB0475                             |
| MinSyn_110 | TCP <sub>2</sub> /RWPRK <sub>1</sub> /bHLH <sub>1</sub> /MYB+/C-CRE/C-CRE                                                                        | computationally designed      | 285         | <a href="https://benchling.com/s/seq-sX2AR6aULzb2lyuoMLYX">https://benchling.com/s/seq-sX2AR6aULzb2lyuoMLYX</a>                                                                                                                                                                                                                                   | pEPYC0CM0416                                | pEPYC1CB0476                             |
| MinSyn_111 | MADS <sub>+</sub> /MYB+/C-CRE/WRKY+/MADS <sub>2</sub> /C2H2+                                                                                     | computationally designed      | 261         | <a href="https://benchling.com/s/seq-pBG4wmcNc3SwSIXKuhWS">https://benchling.com/s/seq-pBG4wmcNc3SwSIXKuhWS</a>                                                                                                                                                                                                                                   | pEPYC0CM0417                                | pEPYC1CB0479                             |
| MinSyn_112 | TCP <sub>2</sub> /C2H2+/Homeobox                                                                                                                 | computationally designed      | 143         | <a href="https://benchling.com/s/seq-vkwMlb37FrE9KbWSkpxl5">https://benchling.com/s/seq-vkwMlb37FrE9KbWSkpxl5</a>                                                                                                                                                                                                                                 | pEPYC0CM0418                                | pEPYC1CB0480                             |
| MinSyn_113 | C-CRE/Homeobox/AP2 <sub>+</sub> /MADS <sub>+</sub> /WRKY/bHLH <sub>2</sub>                                                                       | computationally designed      | 258         | <a href="https://benchling.com/s/seq-odcEChuFtf3378P8NuD1">https://benchling.com/s/seq-odcEChuFtf3378P8NuD1</a>                                                                                                                                                                                                                                   | pEPYC0CM0419                                | pEPYC1CB0481                             |
| MinSyn_114 | C-CRE/C2H2+/G2like/MADS <sub>+</sub> /AP2 <sub>+</sub> /bHLH <sub>1</sub> /RWPRK <sub>2</sub>                                                    | computationally designed      | 243         | <a href="https://benchling.com/s/seq-1pZVxeHhgxrTP8IH7Fz">https://benchling.com/s/seq-1pZVxeHhgxrTP8IH7Fz</a>                                                                                                                                                                                                                                     | pEPYC0CM0420                                | pEPYC1CB0482                             |
| MinSyn_115 | CCAAT+/C2H2+/DBP                                                                                                                                 | computationally designed      | 161         | <a href="https://benchling.com/s/seq-gtv2NB02AKAKqMo9z4M3">https://benchling.com/s/seq-gtv2NB02AKAKqMo9z4M3</a>                                                                                                                                                                                                                                   | pEPYC0CM0421                                | pEPYC1CB0483                             |
| MinSyn_116 | RWPRK <sub>2</sub> /bHLH+/C-CRE/TCP <sub>1</sub> /bHLH <sub>2</sub> /bZIP/bHLH <sub>1</sub>                                                      | computationally designed      | 262         | <a href="https://benchling.com/s/seq-NTaiQg01dsWOX8fZ2nik">https://benchling.com/s/seq-NTaiQg01dsWOX8fZ2nik</a>                                                                                                                                                                                                                                   | pEPYC0CM0422                                | pEPYC1CB0484                             |
| MinSyn_117 | MADS <sub>+</sub> /bHLH <sub>1</sub> /C2H2+/bHLH+/bZIP/WRKY/G2like+/TCP <sub>2</sub> /AP2 <sub>+</sub>                                           | computationally designed      | 315         | <a href="https://benchling.com/s/seq-LPnjbxz4pTd5Circ5IAC">https://benchling.com/s/seq-LPnjbxz4pTd5Circ5IAC</a>                                                                                                                                                                                                                                   | pEPYC0CM0423                                | pEPYC1CB0485                             |
| MinSyn_118 | Homeobox/C-CRE                                                                                                                                   | computationally designed      | 137         | <a href="https://benchling.com/s/seq-917cevKHSyFgOWBg3jra">https://benchling.com/s/seq-917cevKHSyFgOWBg3jra</a>                                                                                                                                                                                                                                   | pEPYC0CM0424                                | pEPYC1CB0486                             |
| MinSyn_119 | TCP <sub>2</sub> /TCP <sub>3</sub> /C2H2+/AP2 <sub>+</sub> /DBP/C2H2/C-CRE                                                                       | computationally designed      | 245         | <a href="https://benchling.com/s/seq-1WZtWPPA.JjzSQqTEmkS">https://benchling.com/s/seq-1WZtWPPA.JjzSQqTEmkS</a>                                                                                                                                                                                                                                   | pEPYC0CM0425                                | pEPYC1CB0487                             |
| MinSyn_120 | C-CRE/HSF+                                                                                                                                       | computationally designed      | 118         | <a href="https://benchling.com/s/seq-0ngHrUjGdIIUWOUiswBz">https://benchling.com/s/seq-0ngHrUjGdIIUWOUiswBz</a>                                                                                                                                                                                                                                   | pEPYC0CM0426                                | pEPYC1CB0488                             |
| MinSyn_121 | MADS <sub>+</sub> /C2C2dof <sub>+</sub> /bHLH+/TCP <sub>1</sub> /MADS <sub>+</sub> /AP2 <sub>+</sub> /DBP/C2H2/AP2 <sub>+</sub>                  | computationally designed      | 329         | <a href="https://benchling.com/s/seq-HFTwco2h8HqVVgcK1soT">https://benchling.com/s/seq-HFTwco2h8HqVVgcK1soT</a>                                                                                                                                                                                                                                   | pEPYC0CM0427                                | pEPYC1CB0489                             |
| MinSyn_122 | C2H2+/Homeobox/AP2 <sub>+</sub> /AP2 <sub>+</sub> /RWPRK <sub>2</sub> /WRKY+/Homeobox/RWPRK <sub>2</sub> /CCAAT+/C2C2dof+/G2like+/DBP/C-CRE/bZIP | computationally designed      | 187         | <a href="https://benchling.com/s/seq-bnSR1g6b08GMnIJThr">https://benchling.com/s/seq-bnSR1g6b08GMnIJThr</a>                                                                                                                                                                                                                                       | pEPYC0CM0428                                | pEPYC1CB0490                             |
| MinSyn_123 | MYB+/MADS <sub>+</sub> /AP2 <sub>+</sub> /AP2 <sub>+</sub> /C-CRE                                                                                | computationally designed      | 214         | <a href="https://benchling.com/s/seq-n1wTXpDjDpO1EEmi2CES">https://benchling.com/s/seq-n1wTXpDjDpO1EEmi2CES</a>                                                                                                                                                                                                                                   | pEPYC0CM0429                                | pEPYC1CB0491                             |
| MinSyn_124 | MYB+/MADS <sub>+</sub> /AP2 <sub>+</sub> /AP2 <sub>+</sub> /C-CRE                                                                                | computationally designed      | 214         | <a href="https://benchling.com/s/seq-7EzWhcgHl3lvJQBbtuB">https://benchling.com/s/seq-7EzWhcgHl3lvJQBbtuB</a>                                                                                                                                                                                                                                     | pEPYC0CM0430                                | pEPYC1CB0492                             |
| MinSyn_285 | bZIP/Homeobox/C2C2dof <sub>+</sub> /C-CRE                                                                                                        | computationally designed      | 209         | <a href="https://benchling.com/s/seq-EouughPWqfDqXnyTEFR9">https://benchling.com/s/seq-EouughPWqfDqXnyTEFR9</a>                                                                                                                                                                                                                                   | pEPYC0CM0244                                | pEPYC1CB0286                             |

**Supplementary Data 2** List of Plasmids

**1. Level 0 Phytobricks**

| Addgene # | Plasmid code | Part type | Description/Origin                    | Compatibility with Assembly Systems | Cloning overhang (top strand) |      | Source of plasmid          |
|-----------|--------------|-----------|---------------------------------------|-------------------------------------|-------------------------------|------|----------------------------|
|           |              |           |                                       |                                     | 5'                            | 3'   |                            |
| 68187     | GB0036       | 3UTR+TERM | 35s (Cauliflower Mosaic Virus)        | MoClo, Loop, GB                     | GCTT                          | CGCT | Vazquez-Vilar et al (2017) |
| -         | GB0552       | PROM+5UTR | 35s (Cauliflower Mosaic Virus)        | GB, Loop                            | GGAG                          | CCAT | Vazquez-Vilar et al (2017) |
| 154477    | pEPYC0CM0071 | PROM      | 35s (Cauliflower Mosaic Virus)        | MoClo, Loop, GB                     | GGAG                          | TACT | This study                 |
| 50337     | pICH41414    | 3UTR+TERM | 35s (Cauliflower Mosaic Virus)        | MoClo, Loop, GB                     | GCTT                          | CGCT | Engler et al (2014)        |
| 154598    | pEPYC0CM0168 | PROM      | 35s ( $\Delta$ AP2 <sub>+</sub> )     | MoClo, Loop, GB                     | GGAG                          | TACT | This study                 |
| 154599    | pEPYC0CM0170 | PROM      | 35s ( $\Delta$ bHLH <sub>1</sub> )    | MoClo, Loop, GB                     | GGAG                          | TACT | This study                 |
| 154600    | pEPYC0CM0169 | PROM      | 35s ( $\Delta$ bZIP)                  | MoClo, Loop, GB                     | GGAG                          | TACT | This study                 |
| 154601    | pEPYC0CM0171 | PROM      | 35s ( $\Delta$ C CRE)                 | MoClo, Loop, GB                     | GGAG                          | TACT | This study                 |
| 154485    | pEPYC0CM0281 | PROM      | 35s ( $\Delta$ C2C2dof <sub>+</sub> ) | MoClo, Loop, GB                     | GGAG                          | TACT | This study                 |
| 154486    | pEPYC0CM0280 | PROM      | 35s ( $\Delta$ C2H2 <sub>+</sub> )    | MoClo, Loop, GB                     | GGAG                          | TACT | This study                 |
| 154487    | pEPYC0CM0285 | PROM      | 35s ( $\Delta$ DBP)                   | MoClo, Loop, GB                     | GGAG                          | TACT | This study                 |
| 154488    | pEPYC0CM0279 | PROM      | 35s ( $\Delta$ HSF <sub>+</sub> )     | MoClo, Loop, GB                     | GGAG                          | TACT | This study                 |
| 154489    | pEPYC0CM0277 | PROM      | 35s ( $\Delta$ MADS <sub>+</sub> )    | MoClo, Loop, GB                     | GGAG                          | TACT | This study                 |
| 154490    | pEPYC0CM0282 | PROM      | 35s ( $\Delta$ RWPRK <sub>1</sub> )   | MoClo, Loop, GB                     | GGAG                          | TACT | This study                 |
| 154491    | pEPYC0CM0283 | PROM      | 35s ( $\Delta$ RWPRK <sub>2</sub> )   | MoClo, Loop, GB                     | GGAG                          | TACT | This study                 |
| 154492    | pEPYC0CM0278 | PROM      | 35s ( $\Delta$ TCP <sub>1</sub> )     | MoClo, Loop, GB                     | GGAG                          | TACT | This study                 |
| 154493    | pEPYC0CM0284 | PROM      | 35s ( $\Delta$ WRKY)                  | MoClo, Loop, GB                     | GGAG                          | TACT | This study                 |
| 154479    | pEPYC0CM0084 | PROM      | CaMV35S (C-CRE relocated)             | MoClo, Loop, GB                     | GGAG                          | TACT | This study                 |
| 154480    | pEPYC0CM0089 | PROM      | CaMV35S (C-CRE relocated)             | MoClo, Loop, GB                     | GGAG                          | TACT | This study                 |
| 154597    | pICSL20002   | 5UTR      | CPMV (CowPea Mosaic Virus)            | MoClo, Loop, GB                     | TACT                          | CCAT | This study                 |
| 50270     | pICSL12006   | PROM+5UTR | CsVMV (Cassava Vein Mosaic Virus)     | MoClo, Loop, GB                     | GGAG                          | AATG | Engler et al (2014)        |
| 50308     | pICSL50007   | CTAG      | FLAG tag                              | MoClo, Loop, GB                     | TTCG                          | GCTT | Engler et al (2014)        |
| 50338     | pICH72400    | 3UTR+TERM | g7 (Agrobacterium tumefaciens)        | MoClo, Loop, GB                     | GCTT                          | CGCT | Engler et al (2014)        |
| -         | GB0900       | NTAG      | GAL4 activation domain                | MoClo, Loop, GB                     | CCAT                          | AATG | Vazquez-Vilar et al (2017) |
| 154593    | pEPYC0CM0258 | NTAG      | HiBit                                 | MoClo, Loop, GB                     | CCAT                          | AATG | This study                 |
| 154594    | pEPAS0CM0008 | CDS       | LucF                                  | MoClo, Loop, GB                     | AATG                          | TTCG | This study                 |
| 154595    | pEPYC0CM0133 | CDS       | LucN                                  | MoClo, Loop, GB                     | AATG                          | TTCG | This study                 |
| 50272     | pICH85281    | PROM      | MAS (Agrobacterium tumefaciens)       | MoClo, Loop, GB                     | GGAG                          | AATG | Engler et al (2014)        |
| 154503    | pEPYC0CM0035 | PROM      | MinSyn_000                            | MoClo, Loop, GB                     | GGAG                          | TACT | This study                 |
| 154504    | pEPYC0CM0366 | PROM      | MinSyn_001                            | MoClo, Loop, GB                     | GGAG                          | TACT | This study                 |
| 154505    | pEPYC0CM0367 | PROM      | MinSyn_002                            | MoClo, Loop, GB                     | GGAG                          | TACT | This study                 |
| 154506    | pEPYC0CM0368 | PROM      | MinSyn_003                            | MoClo, Loop, GB                     | GGAG                          | TACT | This study                 |
| 154507    | pEPYC0CM0379 | PROM      | MinSyn_004                            | MoClo, Loop, GB                     | GGAG                          | TACT | This study                 |
| 154508    | pEPYC0CM0380 | PROM      | MinSyn_005                            | MoClo, Loop, GB                     | GGAG                          | TACT | This study                 |
| 154509    | pEPYC0CM0381 | PROM      | MinSyn_006                            | MoClo, Loop, GB                     | GGAG                          | TACT | This study                 |
| 154510    | pEPYC0CM0372 | PROM      | MinSyn_007                            | MoClo, Loop, GB                     | GGAG                          | TACT | This study                 |
| 154511    | pEPYC0CM0373 | PROM      | MinSyn_008                            | MoClo, Loop, GB                     | GGAG                          | TACT | This study                 |
| 154512    | pEPYC0CM0374 | PROM      | MinSyn_009                            | MoClo, Loop, GB                     | GGAG                          | TACT | This study                 |
| 154513    | pEPYC0CM0385 | PROM      | MinSyn_010                            | MoClo, Loop, GB                     | GGAG                          | TACT | This study                 |
| 154514    | pEPYC0CM0386 | PROM      | MinSyn_011                            | MoClo, Loop, GB                     | GGAG                          | TACT | This study                 |
| 154515    | pEPYC0CM0387 | PROM      | MinSyn_012                            | MoClo, Loop, GB                     | GGAG                          | TACT | This study                 |
| 154516    | pEPYC0CM0390 | PROM      | MinSyn_013                            | MoClo, Loop, GB                     | GGAG                          | TACT | This study                 |
| 154517    | pEPYC0CM0391 | PROM      | MinSyn_014                            | MoClo, Loop, GB                     | GGAG                          | TACT | This study                 |
| 154518    | pEPYC0CM0392 | PROM      | MinSyn_015                            | MoClo, Loop, GB                     | GGAG                          | TACT | This study                 |
| 154519    | pEPYC0CM0375 | PROM      | MinSyn_016                            | MoClo, Loop, GB                     | GGAG                          | TACT | This study                 |
| 154520    | pEPYC0CM0376 | PROM      | MinSyn_017                            | MoClo, Loop, GB                     | GGAG                          | TACT | This study                 |
| 154521    | pEPYC0CM0377 | PROM      | MinSyn_018                            | MoClo, Loop, GB                     | GGAG                          | TACT | This study                 |
| 154522    | pEPYC0CM0382 | PROM      | MinSyn_019                            | MoClo, Loop, GB                     | GGAG                          | TACT | This study                 |
| 154523    | pEPYC0CM0383 | PROM      | MinSyn_020                            | MoClo, Loop, GB                     | GGAG                          | TACT | This study                 |
| 154524    | pEPYC0CM0384 | PROM      | MinSyn_021                            | MoClo, Loop, GB                     | GGAG                          | TACT | This study                 |
| 154525    | pEPYC0CM0393 | PROM      | MinSyn_022                            | MoClo, Loop, GB                     | GGAG                          | TACT | This study                 |
| 154526    | pEPYC0CM0365 | PROM      | MinSyn_023                            | MoClo, Loop, GB                     | GGAG                          | TACT | This study                 |
| 154527    | pEPYC0CM0431 | PROM      | MinSyn_024                            | MoClo, Loop, GB                     | GGAG                          | TACT | This study                 |
| 154528    | pEPYC0CM0435 | PROM      | MinSyn_026                            | MoClo, Loop, GB                     | GGAG                          | TACT | This study                 |
| 154529    | pEPYC0CM0433 | PROM      | MinSyn_027                            | MoClo, Loop, GB                     | GGAG                          | TACT | This study                 |
| 154530    | pEPYC0CM0437 | PROM      | MinSyn_028                            | MoClo, Loop, GB                     | GGAG                          | TACT | This study                 |
| 154531    | pEPYC0CM0439 | PROM      | MinSyn_029                            | MoClo, Loop, GB                     | GGAG                          | TACT | This study                 |
| 154532    | pEPYC0CM0434 | PROM      | MinSyn_030                            | MoClo, Loop, GB                     | GGAG                          | TACT | This study                 |
| 154533    | pEPYC0CM0388 | PROM      | MinSyn_031                            | MoClo, Loop, GB                     | GGAG                          | TACT | This study                 |
| 154534    | pEPYC0CM0440 | PROM      | MinSyn_032                            | MoClo, Loop, GB                     | GGAG                          | TACT | This study                 |
| 154535    | pEPYC0CM0041 | PROM      | MinSyn_033                            | MoClo, Loop, GB                     | GGAG                          | TACT | This study                 |
| 154536    | pEPYC0CM0310 | PROM      | MinSyn_034                            | MoClo, Loop, GB                     | GGAG                          | TACT | This study                 |
| 154537    | pEPYC0CM0312 | PROM      | MinSyn_035                            | MoClo, Loop, GB                     | GGAG                          | TACT | This study                 |
| 154538    | pEPYC0CM0313 | PROM      | MinSyn_036                            | MoClo, Loop, GB                     | GGAG                          | TACT | This study                 |
| 154539    | pEPYC0CM0314 | PROM      | MinSyn_037                            | MoClo, Loop, GB                     | GGAG                          | TACT | This study                 |
| 154540    | pEPYC0CM0225 | PROM      | MinSyn_038                            | MoClo, Loop, GB                     | GGAG                          | TACT | This study                 |
| 154541    | pEPYC0CM0209 | PROM      | MinSyn_039                            | MoClo, Loop, GB                     | GGAG                          | TACT | This study                 |
| 154542    | pEPYC0CM0210 | PROM      | MinSyn_040                            | MoClo, Loop, GB                     | GGAG                          | TACT | This study                 |
| 154543    | pEPYC0CM0211 | PROM      | MinSyn_041                            | MoClo, Loop, GB                     | GGAG                          | TACT | This study                 |
| 154544    | pEPYC0CM0311 | PROM      | MinSyn_042                            | MoClo, Loop, GB                     | GGAG                          | TACT | This study                 |
| 154545    | pEPYC0CM0212 | PROM      | MinSyn_043                            | MoClo, Loop, GB                     | GGAG                          | TACT | This study                 |
| 154546    | pEPYC0CM0213 | PROM      | MinSyn_044                            | MoClo, Loop, GB                     | GGAG                          | TACT | This study                 |
| 154547    | pEPYC0CM0214 | PROM      | MinSyn_045                            | MoClo, Loop, GB                     | GGAG                          | TACT | This study                 |
| 154609    | pEPYC0CM0182 | PROM      | MinSyn_046                            | MoClo, Loop, GB                     | GGAG                          | TACT | This study                 |
| 154548    | pEPYC0CM0395 | PROM      | MinSyn_048                            | MoClo, Loop, GB                     | GGAG                          | TACT | This study                 |
| 154549    | pEPYC0CM0396 | PROM      | MinSyn_049                            | MoClo, Loop, GB                     | GGAG                          | TACT | This study                 |
| 154550    | pEPYC0CM0451 | PROM      | MinSyn_050                            | MoClo, Loop, GB                     | GGAG                          | TACT | This study                 |
| 154551    | pEPYC0CM0452 | PROM      | MinSyn_051                            | MoClo, Loop, GB                     | GGAG                          | TACT | This study                 |
| 154610    | pEPYC0CM0183 | PROM      | MinSyn_052                            | MoClo, Loop, GB                     | GGAG                          | TACT | This study                 |
| 154552    | pEPYC0CM0397 | PROM      | MinSyn_054                            | MoClo, Loop, GB                     | GGAG                          | TACT | This study                 |
| 154553    | pEPYC0CM0398 | PROM      | MinSyn_055                            | MoClo, Loop, GB                     | GGAG                          | TACT | This study                 |

**1. Level 0 Phytobricks**

| Addgene # | Plasmid code  | Part type      | Description/Origin                   | Compatibility with Assembly Systems | Cloning overhang (top strand) |      | Source of plasmid          |
|-----------|---------------|----------------|--------------------------------------|-------------------------------------|-------------------------------|------|----------------------------|
|           |               |                |                                      |                                     | 5'                            | 3'   |                            |
| 154554    | pEPYC0CM0453  | PROM           | MinSyn 056                           | MoClo, Loop, GB                     | GGAG                          | TACT | This study                 |
| 154555    | pEPYC0CM0454  | PROM           | MinSyn 057                           | MoClo, Loop, GB                     | GGAG                          | TACT | This study                 |
| 154611    | pEPYC0CM0184  | PROM           | MinSyn 058                           | MoClo, Loop, GB                     | GGAG                          | TACT | This study                 |
| 154556    | pEPYC0CM0401  | PROM           | MinSyn 060                           | MoClo, Loop, GB                     | GGAG                          | TACT | This study                 |
| 154557    | pEPYC0CM0402  | PROM           | MinSyn 061                           | MoClo, Loop, GB                     | GGAG                          | TACT | This study                 |
| 154558    | pEPYC0CM0455  | PROM           | MinSyn 062                           | MoClo, Loop, GB                     | GGAG                          | TACT | This study                 |
| 154559    | pEPYC0CM0456  | PROM           | MinSyn 063                           | MoClo, Loop, GB                     | GGAG                          | TACT | This study                 |
| 154560    | pEPAS0CMR0015 | PROM           | MinSyn 064                           | MoClo, Loop, GB                     | GGAG                          | AATG | This study                 |
| 154561    | pEPAS0CMR0016 | PROM           | MinSyn 065                           | MoClo, Loop, GB                     | GGAG                          | AATG | This study                 |
| 154562    | pEPKK0CM0107  | PROM           | MinSyn 066                           | MoClo, Loop, GB                     | GGAG                          | AATG | This study                 |
| 154563    | pEPKK0CM0065  | PROM           | MinSyn 067                           | MoClo, Loop, GB                     | GGAG                          | AATG | This study                 |
| 154590    | pEPKK0CM0062  | DIST+PROX+CORE | MinSyn 068                           | MoClo, Loop, GB                     | GGAG                          | CCAT | This study                 |
| 154592    | pEPKK0CM0111  | NTAG           | MinSyn 068 and MinSyn 069            | MoClo, Loop, GB                     | CCAT                          | AATG | This study                 |
| 154589    | pEPKK0CM0063  | DIST           | MinSyn 069                           | MoClo, Loop, GB                     | GGAG                          | TGAC | This study                 |
| 154591    | pEPKK0CM0064  | PROX+CORE      | MinSyn 069                           | MoClo, Loop, GB                     | TGAC                          | CCAT | This study                 |
| 154564    | pEPYC0CM0407  | PROM           | MinSyn 101                           | MoClo, Loop, GB                     | GGAG                          | TACT | This study                 |
| 154565    | pEPYC0CM0408  | PROM           | MinSyn 102                           | MoClo, Loop, GB                     | GGAG                          | TACT | This study                 |
| 154566    | pEPYC0CM0409  | PROM           | MinSyn 103                           | MoClo, Loop, GB                     | GGAG                          | TACT | This study                 |
| 154567    | pEPYC0CM0410  | PROM           | MinSyn 104                           | MoClo, Loop, GB                     | GGAG                          | TACT | This study                 |
| 154568    | pEPYC0CM0411  | PROM           | MinSyn 105                           | MoClo, Loop, GB                     | GGAG                          | TACT | This study                 |
| 154569    | pEPYC0CM0412  | PROM           | MinSyn 106                           | MoClo, Loop, GB                     | GGAG                          | TACT | This study                 |
| 154570    | pEPYC0CM0413  | PROM           | MinSyn 107                           | MoClo, Loop, GB                     | GGAG                          | TACT | This study                 |
| 154571    | pEPYC0CM0414  | PROM           | MinSyn 108                           | MoClo, Loop, GB                     | GGAG                          | TACT | This study                 |
| 154572    | pEPYC0CM0415  | PROM           | MinSyn 109                           | MoClo, Loop, GB                     | GGAG                          | TACT | This study                 |
| 154573    | pEPYC0CM0416  | PROM           | MinSyn 110                           | MoClo, Loop, GB                     | GGAG                          | TACT | This study                 |
| 154574    | pEPYC0CM0417  | PROM           | MinSyn 111                           | MoClo, Loop, GB                     | GGAG                          | TACT | This study                 |
| 154575    | pEPYC0CM0418  | PROM           | MinSyn 112                           | MoClo, Loop, GB                     | GGAG                          | TACT | This study                 |
| 154576    | pEPYC0CM0419  | PROM           | MinSyn 113                           | MoClo, Loop, GB                     | GGAG                          | TACT | This study                 |
| 154577    | pEPYC0CM0420  | PROM           | MinSyn 114                           | MoClo, Loop, GB                     | GGAG                          | TACT | This study                 |
| 154578    | pEPYC0CM0421  | PROM           | MinSyn 115                           | MoClo, Loop, GB                     | GGAG                          | TACT | This study                 |
| 154579    | pEPYC0CM0422  | PROM           | MinSyn 116                           | MoClo, Loop, GB                     | GGAG                          | TACT | This study                 |
| 154580    | pEPYC0CM0423  | PROM           | MinSyn 117                           | MoClo, Loop, GB                     | GGAG                          | TACT | This study                 |
| 154581    | pEPYC0CM0424  | PROM           | MinSyn 118                           | MoClo, Loop, GB                     | GGAG                          | TACT | This study                 |
| 154582    | pEPYC0CM0425  | PROM           | MinSyn 119                           | MoClo, Loop, GB                     | GGAG                          | TACT | This study                 |
| 154583    | pEPYC0CM0426  | PROM           | MinSyn 120                           | MoClo, Loop, GB                     | GGAG                          | TACT | This study                 |
| 154584    | pEPYC0CM0427  | PROM           | MinSyn 121                           | MoClo, Loop, GB                     | GGAG                          | TACT | This study                 |
| 154585    | pEPYC0CM0428  | PROM           | MinSyn 122                           | MoClo, Loop, GB                     | GGAG                          | TACT | This study                 |
| 154586    | pEPYC0CM0429  | PROM           | MinSyn 123                           | MoClo, Loop, GB                     | GGAG                          | TACT | This study                 |
| 154587    | pEPYC0CM0430  | PROM           | MinSyn 124                           | MoClo, Loop, GB                     | GGAG                          | TACT | This study                 |
| 154588    | pEPYC0CM0244  | PROM           | MinSyn 285                           | MoClo, Loop, GB                     | GGAG                          | TACT | This study                 |
| 154481    | pEPYC0CM0099  | PROM           | MMV (C-CRE relocated)                | MoClo, Loop, GB                     | GGAG                          | TACT | This study                 |
| 154482    | pEPYC0CM0115  | PROM           | MMV (C-CRE relocated)                | MoClo, Loop, GB                     | GGAG                          | TACT | This study                 |
| 154478    | pEPYC0CM0095  | PROM           | MMV (Mirabalis Mosaic Virus)         | MoClo, Loop, GB                     | GGAG                          | TACT | This study                 |
| 154496    | pEPYC0CM0290  | PROM           | MMV( $\Delta$ bHLH+)                 | MoClo, Loop, GB                     | GGAG                          | TACT | This study                 |
| 154497    | pEPYC0CM0289  | PROM           | MMV( $\Delta$ bHLH <sub>2</sub> )    | MoClo, Loop, GB                     | GGAG                          | TACT | This study                 |
| 154603    | pEPYC0CM0175  | PROM           | MMV( $\Delta$ C CRE)                 | MoClo, Loop, GB                     | GGAG                          | TACT | This study                 |
| 154602    | pEPYC0CM0174  | PROM           | MMV( $\Delta$ C2C2dof <sub>2</sub> ) | MoClo, Loop, GB                     | GGAG                          | TACT | This study                 |
| 154495    | pEPYC0CM0292  | PROM           | MMV( $\Delta$ CCAAT+)                | MoClo, Loop, GB                     | GGAG                          | TACT | This study                 |
| 154494    | pEPYC0CM0288  | PROM           | MMV( $\Delta$ G2like)                | MoClo, Loop, GB                     | GGAG                          | TACT | This study                 |
| 154498    | pEPYC0CM0286  | PROM           | MMV( $\Delta$ MADS <sub>2</sub> )    | MoClo, Loop, GB                     | GGAG                          | TACT | This study                 |
| 154604    | pEPYC0CM0172  | PROM           | MMV( $\Delta$ MYB+)                  | MoClo, Loop, GB                     | GGAG                          | TACT | This study                 |
| 154608    | pEPYC0CM0173  | PROM           | MMV( $\Delta$ TCP <sub>2</sub> )     | MoClo, Loop, GB                     | GGAG                          | TACT | This study                 |
| 154502    | pEPYC0CM0287  | PROM           | MMV( $\Delta$ TCP <sub>3</sub> )     | MoClo, Loop, GB                     | GGAG                          | TACT | This study                 |
| 154499    | pEPYC0CM0291  | PROM           | MMV( $\Delta$ WRKY+)                 | MoClo, Loop, GB                     | GGAG                          | TACT | This study                 |
| 50339     | pICH41421     | 3UTR+TERM      | NOS (Agrobacterium tumefaciens)      | MoClo, Loop, GB                     | GCTT                          | CGCT | Engler et al (2014)        |
| 50255     | pICH42211     | PROM           | NOS (Agrobacterium tumefaciens)      | MoClo, Loop, GB                     | GGAG                          | TACT | Engler et al (2014)        |
| 154484    | pEPYC0CM0119  | PROM           | NOS (C-CRE relocated)                | MoClo, Loop, GB                     | GGAG                          | TACT | This study                 |
| 154483    | pEPYC0CM0120  | PROM           | NOS (C-CRE relocated)                | MoClo, Loop, GB                     | GGAG                          | TACT | This study                 |
| 154500    | pEPYC0CM0294  | PROM           | NOS( $\Delta$ AP2 <sub>2</sub> )     | MoClo, Loop, GB                     | GGAG                          | TACT | This study                 |
| 154605    | pEPYC0CM0178  | PROM           | NOS( $\Delta$ C CRE)                 | MoClo, Loop, GB                     | GGAG                          | TACT | This study                 |
| 154606    | pEPYC0CM0177  | PROM           | NOS( $\Delta$ C2H2)                  | MoClo, Loop, GB                     | GGAG                          | TACT | This study                 |
| 154501    | pEPYC0CM0293  | PROM           | NOS( $\Delta$ G2like+)               | MoClo, Loop, GB                     | GGAG                          | TACT | This study                 |
| 154607    | pEPYC0CM0176  | PROM           | NOS( $\Delta$ homeobox)              | MoClo, Loop, GB                     | GGAG                          | TACT | This study                 |
| 68257     | pICSL12009    | PROM           | ZmUbi (Zae mays)                     | MoClo, Loop, GB                     | GGAG                          | AATG | Lawrenson et al (2015)     |
| 68260     | pICSL80037    | CDS            | NptII                                | MoClo, Loop, GB                     | AATG                          | GCTT | Lawrenson et al (2015)     |
| 50343     | pICH41432     | 3UTR+TERM      | OCS (Agrobacterium tumefaciens)      | MoClo, Loop, GB                     | GCTT                          | CGCT | Engler et al (2014)        |
| -         | GB UD 32AB    | CDS            | PhiC3 binding domain                 | GB                                  | AATG                          | GCTT | Vazquez-Vilar et al (2017) |
| 154596    | pEPKK0CM0068  | CDS            | TALE                                 | MoClo, Loop, GB                     | AATG                          | GCTT | This study                 |
| 50285     | pICH41402     | 5UTR           | TMV $\Omega$ (Tobacco Mosaic Virus)  | MoClo, Loop, GB                     | TACT                          | AATG | Engler et al (2014)        |
| 50332     | pICSL80016    | CDS            | uidA (GUS)                           | MoClo, Loop, GB                     | AATG                          | TTCG | Engler et al (2014)        |
| 117536    | pICSL50005    | CTAG           | YFP                                  | MoClo, Loop, GB                     | TTCG                          | GCTT | Raitskin et al (2019)      |

2. Expression cassettes

| Addgene # | Plasmid code   | Level 0 Parts |               |            |              |              |              |           |            |           |      | Cloning overhang           |            |  | Source |
|-----------|----------------|---------------|---------------|------------|--------------|--------------|--------------|-----------|------------|-----------|------|----------------------------|------------|--|--------|
|           |                | PROM          |               |            | SUTR         | NTAG         | CDS          | CTAG      | 3'UTR/TERM | Acceptor  | 5'   | 3'                         |            |  |        |
|           |                | DIST          | PROX          | CORE       |              |              |              |           |            |           |      |                            |            |  |        |
| 154624    | pEPYC1CB0308   |               | pICSL12006    |            | -            |              | pUAP80037    |           | pICH41414  | pICH47732 | TGCC | GCAA                       | This study |  |        |
| 154625    | pEPYC1CB0305   |               | pEPYC0CM0244  | pICSL20002 | pEPYC0CM0258 | pICSL80016   | pICSL50005   | pICH41432 | pICH47811  | TAGT      | TTGC | This study                 |            |  |        |
| 154626    | pEPYC1CB0477   |               | pEPYC0CM0410  | pICSL20002 | pEPYC0CM0258 | pICSL80016   | pICSL50005   | pICH41432 | pICH47811  | TAGT      | TTGC | This study                 |            |  |        |
| 154627    | pEPYC1CB0478   |               | pEPYC0CM0414  | pICSL20002 | pEPYC0CM0258 | pICSL80016   | pICSL50005   | pICH41432 | pICH47811  | TAGT      | TTGC | This study                 |            |  |        |
| 154628    | pEPYC1CB0503   |               | pEPYC0CM0035  | pICSL20002 | pEPYC0CM0258 | pICSL80016   | pICSL50005   | pICH41432 | pICH47811  | TAGT      | TTGC | This study                 |            |  |        |
| 154612    | pEPYCa1KN0002  |               | pEPYC0CM0414  | pICSL20002 | GB0900       | GB UD 32AB   | -            | pDGB3 α1  | pDGB3 α1   | GGAG      | GTCA | This study                 |            |  |        |
| 154614    | pEPYCa1KN0007  |               | pEPYC0CM0414  | pICH41402  | -            | pEPK0CM0068  | -            | pICH41432 | pDGB3 α1   | GGAG      | GTCA | This study                 |            |  |        |
| -         | GB UA 114A     |               | GB0552        | -          | GB0900       | GB UD 32AB   | -            | GB0036    | pDGB3 α1   | GGAG      | GTCA | Vazquez-Vilar et al (2017) |            |  |        |
| 154615    | pEPYCa1KN0008  |               | pEPK0CM0107   | -          | -            | pEPAS0CM0008 | pICSL50007   | pICH72400 | pDGB3 α1   | GGAG      | GTCA | This study                 |            |  |        |
| 154616    | pEPYCa2rKN0009 |               | pEPK0CM0107   | -          | -            | pEPYC0CM0133 | pICSL50007   | pICH41421 | pDGB3 α2R  | GTCA      | GGAG | This study                 |            |  |        |
| 154617    | pEPYCa2rKN0010 |               | pEPAS0CMR0015 | -          | -            | pEPYC0CM0133 | pICSL50007   | pICH41421 | pDGB3 α2R  | GTCA      | GGAG | This study                 |            |  |        |
| 154618    | pEPKCa2KN0091  |               | pEPAS0CMR0015 | -          | -            | pEPYC0CM0133 | pICSL50007   | pICH72400 | pDGB3 α1   | GGAG      | GTCA | This study                 |            |  |        |
| 154619    | pEPKCa2KN0092  |               | pEPAS0CMR0016 | -          | -            | pEPYC0CM0133 | pICSL50007   | pICH72400 | pDGB3 α1   | GGAG      | GTCA | This study                 |            |  |        |
| 154620    | pEPKCa2KN0093  |               | pEPK0CM0107   | -          | -            | pEPYC0CM0133 | pICSL50007   | pICH72400 | pDGB3 α1   | GGAG      | GTCA | This study                 |            |  |        |
| 154621    | pEPKCa2KN0100  |               | pEPK0CM0065   | -          | -            | pEPYC0CM0133 | pICSL50007   | pICH72400 | pDGB3 α1   | GGAG      | GTCA | This study                 |            |  |        |
| 154622    | pEPKCa2KN0101  |               | pEPK0CM0062   | -          | -            | pEPK0CM0111  | pEPYC0CM0133 | pICH72400 | pDGB3 α1   | GGAG      | GTCA | This study                 |            |  |        |
| 154623    | pEPKCa2KN0102  | pEPK0CM0063   | pEPK0CM0064   | -          | -            | pEPK0CM0111  | pEPYC0CM0133 | pICH72400 | pDGB3 α1   | GGAG      | GTCA | This study                 |            |  |        |
| 154629    | pEPYC1CB0003   |               | pICH42211     | pICH41402  | -            | pEPAS0CM0008 | pICSL50007   | pICH41432 | pICH47732  | TGCC      | GCAA | This study                 |            |  |        |
| 154630    | pEPYC1CB0007   |               | pEPYC0CM0035  | pICH41402  | -            | pEPAS0CM0008 | pICSL50007   | pICH41432 | pICH47732  | TGCC      | GCAA | This study                 |            |  |        |
| 154631    | pEPYC1CB0079   |               | pEPYC0CM0041  | pICH41402  | -            | pEPAS0CM0008 | pICSL50007   | pICH41432 | pICH47732  | TGCC      | GCAA | This study                 |            |  |        |
| 154632    | pEPYC1CB0109   |               | pEPYC0CM0071  | pICH41402  | -            | pEPAS0CM0008 | pICSL50007   | pICH41432 | pICH47732  | TGCC      | GCAA | This study                 |            |  |        |
| 154633    | pEPYC1CB0122   |               | pEPYC0CM0084  | pICH41402  | -            | pEPAS0CM0008 | pICSL50007   | pICH41432 | pICH47732  | TGCC      | GCAA | This study                 |            |  |        |
| 154634    | pEPYC1CB0127   |               | pEPYC0CM0089  | pICH41402  | -            | pEPAS0CM0008 | pICSL50007   | pICH41432 | pICH47732  | TGCC      | GCAA | This study                 |            |  |        |
| 154635    | pEPYC1CB0133   |               | pEPYC0CM0095  | pICH41402  | -            | pEPAS0CM0008 | pICSL50007   | pICH41432 | pICH47732  | TGCC      | GCAA | This study                 |            |  |        |
| 154636    | pEPYC1CB0137   |               | pEPYC0CM0099  | pICH41402  | -            | pEPAS0CM0008 | pICSL50007   | pICH41432 | pICH47732  | TGCC      | GCAA | This study                 |            |  |        |
| 154637    | pEPYC1CB0153   |               | pEPYC0CM0115  | pICH41402  | -            | pEPAS0CM0008 | pICSL50007   | pICH41432 | pICH47732  | TGCC      | GCAA | This study                 |            |  |        |
| 154638    | pEPYC1CB0157   |               | pEPYC0CM0119  | pICH41402  | -            | pEPAS0CM0008 | pICSL50007   | pICH41432 | pICH47732  | TGCC      | GCAA | This study                 |            |  |        |
| 154639    | pEPYC1CB0158   |               | pEPYC0CM0120  | pICH41402  | -            | pEPAS0CM0008 | pICSL50007   | pICH41432 | pICH47732  | TGCC      | GCAA | This study                 |            |  |        |
| 154640    | pEPYC1CB0173   |               | pEPYC0CM0168  | pICH41402  | -            | pEPAS0CM0008 | pICSL50007   | pICH41432 | pICH47732  | TGCC      | GCAA | This study                 |            |  |        |
| 154641    | pEPYC1CB0174   |               | pEPYC0CM0169  | pICH41402  | -            | pEPAS0CM0008 | pICSL50007   | pICH41432 | pICH47732  | TGCC      | GCAA | This study                 |            |  |        |
| 154642    | pEPYC1CB0175   |               | pEPYC0CM0170  | pICH41402  | -            | pEPAS0CM0008 | pICSL50007   | pICH41432 | pICH47732  | TGCC      | GCAA | This study                 |            |  |        |
| 154643    | pEPYC1CB0176   |               | pEPYC0CM0171  | pICH41402  | -            | pEPAS0CM0008 | pICSL50007   | pICH41432 | pICH47732  | TGCC      | GCAA | This study                 |            |  |        |
| 154644    | pEPYC1CB0177   |               | pEPYC0CM0172  | pICH41402  | -            | pEPAS0CM0008 | pICSL50007   | pICH41432 | pICH47732  | TGCC      | GCAA | This study                 |            |  |        |
| 154645    | pEPYC1CB0178   |               | pEPYC0CM0173  | pICH41402  | -            | pEPAS0CM0008 | pICSL50007   | pICH41432 | pICH47732  | TGCC      | GCAA | This study                 |            |  |        |
| 154646    | pEPYC1CB0179   |               | pEPYC0CM0174  | pICH41402  | -            | pEPAS0CM0008 | pICSL50007   | pICH41432 | pICH47732  | TGCC      | GCAA | This study                 |            |  |        |
| 154647    | pEPYC1CB0180   |               | pEPYC0CM0175  | pICH41402  | -            | pEPAS0CM0008 | pICSL50007   | pICH41432 | pICH47732  | TGCC      | GCAA | This study                 |            |  |        |
| 154648    | pEPYC1CB0181   |               | pEPYC0CM0176  | pICH41402  | -            | pEPAS0CM0008 | pICSL50007   | pICH41432 | pICH47732  | TGCC      | GCAA | This study                 |            |  |        |
| 154649    | pEPYC1CB0182   |               | pEPYC0CM0177  | pICH41402  | -            | pEPAS0CM0008 | pICSL50007   | pICH41432 | pICH47732  | TGCC      | GCAA | This study                 |            |  |        |
| 154650    | pEPYC1CB0183   |               | pEPYC0CM0178  | pICH41402  | -            | pEPAS0CM0008 | pICSL50007   | pICH41432 | pICH47732  | TGCC      | GCAA | This study                 |            |  |        |
| 154651    | pEPYC1CB0187   |               | pEPYC0CM0182  | pICH41402  | -            | pEPAS0CM0008 | pICSL50007   | pICH41432 | pICH47732  | TGCC      | GCAA | This study                 |            |  |        |
| 154652    | pEPYC1CB0188   |               | pEPYC0CM0183  | pICH41402  | -            | pEPAS0CM0008 | pICSL50007   | pICH41432 | pICH47732  | TGCC      | GCAA | This study                 |            |  |        |
| 154653    | pEPYC1CB0189   |               | pEPYC0CM0184  | pICH41402  | -            | pEPAS0CM0008 | pICSL50007   | pICH41432 | pICH47732  | TGCC      | GCAA | This study                 |            |  |        |
| 154654    | pEPYC1CB0197   |               | pICH42211     | pICH41402  | -            | pEPYC0CM0133 | pICSL50007   | pICH41421 | pICH47732  | TGCC      | GCAA | This study                 |            |  |        |
| 154655    | pEPYC1CB0199   |               | pICH85281     | pICH41402  | -            | pEPAS0CM0008 | pICSL50007   | pICH41432 | pICH47732  | TGCC      | GCAA | This study                 |            |  |        |
| 154656    | pEPYC1CB0253   |               | pEPYC0CM0209  | pICH41402  | -            | pEPAS0CM0008 | pICSL50007   | pICH41432 | pICH47732  | TGCC      | GCAA | This study                 |            |  |        |
| 154657    | pEPYC1CB0254   |               | pEPYC0CM0210  | pICH41402  | -            | pEPAS0CM0008 | pICSL50007   | pICH41432 | pICH47732  | TGCC      | GCAA | This study                 |            |  |        |
| 154658    | pEPYC1CB0255   |               | pEPYC0CM0211  | pICH41402  | -            | pEPAS0CM0008 | pICSL50007   | pICH41432 | pICH47732  | TGCC      | GCAA | This study                 |            |  |        |
| 154659    | pEPYC1CB0256   |               | pEPYC0CM0212  | pICH41402  | -            | pEPAS0CM0008 | pICSL50007   | pICH41432 | pICH47732  | TGCC      | GCAA | This study                 |            |  |        |
| 154660    | pEPYC1CB0257   |               | pEPYC0CM0213  | pICH41402  | -            | pEPAS0CM0008 | pICSL50007   | pICH41432 | pICH47732  | TGCC      | GCAA | This study                 |            |  |        |
| 154661    | pEPYC1CB0258   |               | pEPYC0CM0214  | pICH41402  | -            | pEPAS0CM0008 | pICSL50007   | pICH41432 | pICH47732  | TGCC      | GCAA | This study                 |            |  |        |
| 154662    | pEPYC1CB0269   |               | pEPYC0CM0225  | pICH41402  | -            | pEPAS0CM0008 | pICSL50007   | pICH41432 | pICH47732  | TGCC      | GCAA | This study                 |            |  |        |
| 154663    | pEPYC1CB0286   |               | pEPYC0CM0244  | pICH41402  | -            | pEPYC0CM0133 | pICSL50007   | pICH41421 | pICH47732  | TGCC      | GCAA | This study                 |            |  |        |
| 154664    | pEPYC1CB0319   |               | pEPYC0CM0277  | pICH41402  | -            | pEPAS0CM0008 | pICSL50007   | pICH41432 | pICH47732  | TGCC      | GCAA | This study                 |            |  |        |
| 154665    | pEPYC1CB0320   |               | pEPYC0CM0278  | pICH41402  | -            | pEPAS0CM0008 | pICSL50007   | pICH41432 | pICH47732  | TGCC      | GCAA | This study                 |            |  |        |
| 154666    | pEPYC1CB0321   |               | pEPYC0CM0279  | pICH41402  | -            | pEPAS0CM0008 | pICSL50007   | pICH41432 | pICH47732  | TGCC      | GCAA | This study                 |            |  |        |
| 154667    | pEPYC1CB0322   |               | pEPYC0CM0280  | pICH41402  | -            | pEPAS0CM0008 | pICSL50007   | pICH41432 | pICH47732  | TGCC      | GCAA | This study                 |            |  |        |
| 154668    | pEPYC1CB0323   |               | pEPYC0CM0281  | pICH41402  | -            | pEPAS0CM0008 | pICSL50007   | pICH41432 | pICH47732  | TGCC      | GCAA | This study                 |            |  |        |
| 154669    | pEPYC1CB0324   |               | pEPYC0CM0282  | pICH41402  | -            | pEPAS0CM0008 | pICSL50007   | pICH41432 | pICH47732  | TGCC      | GCAA | This study                 |            |  |        |
| 154670    | pEPYC1CB0325   |               | pEPYC0CM0283  | pICH41402  | -            | pEPAS0CM0008 | pICSL50007   | pICH41432 | pICH47732  | TGCC      | GCAA | This study                 |            |  |        |
| 154671    | pEPYC1CB0326   |               | pEPYC0CM0284  | pICH41402  | -            | pEPAS0CM0008 | pICSL50007   | pICH41432 | pICH47732  | TGCC      | GCAA | This study                 |            |  |        |
| 154672    | pEPYC1CB0327   |               | pEPYC0CM0285  | pICH41402  | -            | pEPAS0CM0008 | pICSL50007   | pICH41432 | pICH47732  | TGCC      | GCAA | This study                 |            |  |        |
| 154673    | pEPYC1CB0328   |               | pEPYC0CM0286  | pICH41402  | -            | pEPAS0CM0008 | pICSL50007   | pICH41432 | pICH47732  | TGCC      | GCAA | This study                 |            |  |        |
| 154674    | pEPYC1CB0329   |               | pEPYC0CM0287  | pICH41402  | -            | pEPAS0CM0008 | pICSL50007   | pICH41432 | pICH47732  | TGCC      | GCAA | This study                 |            |  |        |
| 154675    | pEPYC1CB0330   |               | pEPYC0CM0288  | pICH41402  | -            | pEPAS0CM0008 | pICSL50007   | pICH41432 | pICH47732  | TGCC      | GCAA | This study                 |            |  |        |
| 154676    | pEPYC1CB0331   |               | pEPYC0CM0289  | pICH41402  | -            | pEPAS0CM0008 | pICSL50007   | pICH41432 | pICH47732  | TGCC      | GCAA | This study                 |            |  |        |
| 154677    | pEPYC1CB0332   |               | pEPYC0CM0290  | pICH41402  | -            | pEPAS0CM0008 | pICSL50007   | pICH41432 | pICH47732  | TGCC      | GCAA | This study                 |            |  |        |
| 154678    | pEPYC1CB0333   |               | pEPYC0CM0291  | pICH41402  | -            | pEPAS0CM0008 | pICSL50007   | pICH41432 | pICH47732  | TGCC      | GCAA | This study                 |            |  |        |
| 154679    | pEPYC1CB0334   |               | pEPYC0CM0292  | pICH41402  | -            | pEPAS0CM0008 | pICSL50007   | pICH41432 | pICH47732  | TGCC      | GCAA | This study                 |            |  |        |
| 154680    | pEPYC1CB0335   |               | pEPYC0CM0293  | pICH41402  | -            | pEPAS0CM0008 | pICSL50007   | pICH41432 | pICH47732  | TGCC      | GCAA | This study                 |            |  |        |
| 154681    | pEPYC1CB0336   |               | pEPYC0CM0294  | pICH41402  | -            | pEPAS0CM0008 | pICSL50007   | pICH41432 | pICH47732  | TGCC      | GCAA | This study                 |            |  |        |
| 154682    | pEPYC1CB0352   |               | pEPYC0CM0310  | pICH41402  | -            | pEPAS0CM0008 | pICSL50007   | pICH41432 | pICH47732  | TGCC      | GCAA | This study                 |            |  |        |
| 154683    | pEPYC1CB0353   |               | pEPYC0CM0311  | pICH41402  | -            | pEPAS0CM0008 | pICSL50007   | pICH41432 | pICH47732  | TGCC      | GCAA | This study                 |            |  |        |
| 154684    | pEPYC1CB0354   |               | pEPYC0CM0312  | pICH41402  | -            | pEPAS0CM0008 | pICSL50007   | pICH41432 | pICH47732  | TGCC      | GCAA | This study                 |            |  |        |
| 154685    | pEPYC1CB0355   |               | pEPYC0CM0313  | pICH41402  | -            | pEPAS0CM0008 | pICSL50007   | pICH41432 | pICH47732  | TGCC      | GCAA | This study                 |            |  |        |
| 154686    | pEPYC1CB0356   |               | pEPYC0CM0314  | pICH41402  | -            | pEPAS0CM0008 | pICSL50007   | pICH41432 | pICH47732  | TGCC      | GCAA | This study                 |            |  |        |
| 154687    | pEPYC1CB0425   |               | pEPYC0CM0365  | pICH41402  | -            | pEPAS0CM0008 | pICSL50007   | pICH41432 | pICH47732  | TGCC      | GCAA | This study                 |            |  |        |
| 154688    | pEPYC1CB0426   |               | pEPYC0CM0366  | pICH41402  | -            | pEPAS0CM0008 | pICSL50007   | pICH41432 | pICH47732  | TGCC      | GCAA | This study                 |            |  |        |
| 154689    | pEPYC1CB0427   |               | pEPYC0CM0367  | pICH41402  | -            | pEPAS0CM0008 | pICSL50007   | pICH41432 | pICH47732  | TGCC      | GCAA | This study                 |            |  |        |
| 154690    | pEPYC1CB0428   |               | pEPYC0CM0368  | pICH41402  | -            | pEPAS0CM0008 | pICSL50007   | pICH41432 | pICH47732  | TGCC      | GCAA | This study                 |            |  |        |
| 154691    | pEPYC1CB0432   |               | pEPYC0CM0372  | pICH41402  | -            | pEPAS0CM0008 | pICSL50007   | pICH41432 | pICH47732  | TGCC      | GCAA | This study                 |            |  |        |
| 154692    | pEPYC1CB0433   |               | pEPYC0CM0373  | pICH41402  | -            | pEPAS0CM0008 | pICSL50007   | pICH41432 | pICH47732  | TGCC      | GCAA | This study                 |            |  |        |
| 154693    | pEPYC1CB0434   |               | pEPYC0CM0374  | pICH41402  | -            | pEPAS0CM0008 | pICSL50007   | pICH41432 | pICH47732  | TGCC      | GCAA | This study                 |            |  |        |
| 154694    | pEPYC1CB0435   |               | pEPYC0CM0375  | pICH41402  | -            | pEPAS0CM0008 | pICSL50007   | pICH41432 | pICH47732  | TGCC      | GCAA | This study                 |            |  |        |
| 154695    | pEPYC1CB0436   |               | pEPYC0CM0376  | pICH41402  | -            | pEPAS0CM0008 | pICSL50007   | pICH41432 | pICH47732  | TGCC      | GCAA | This study                 |            |  |        |
| 154696    | pEPYC1CB0437   |               | pEPYC0CM0377  | pICH41402  | -            | pEPAS0CM0008 | pICSL50007   | pICH41432 | pICH47732  | TGCC      | GCAA | This study                 |            |  |        |
| 154697    | pEPYC1CB0439   |               |               |            |              |              |              |           |            |           |      |                            |            |  |        |



### Supplementary Data 3

Expression profiles of *Arabidopsis thaliana* genes encoding transcription factors predicted to bind to the following constitutive promoters:

- (1) Cauliflower Mosaic Virus 35s (*CaMV35s*)
- (2) Mirabilis Mosaic Virus (*MMV*)
- (3) *Agrobacterium tumefaciens nopaline synthase* (*AtuNOS*)
- (4) *A. thaliana* actin (*AtACT2*)
- (5) *A. thaliana* ubiquitin-conjugating enzyme 9 (*AtUBC9*)
- (6) *A. thaliana* polyubiquitin 10 (*AtUBI10*)

TPM = Transcripts per million

(1)

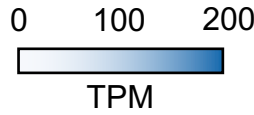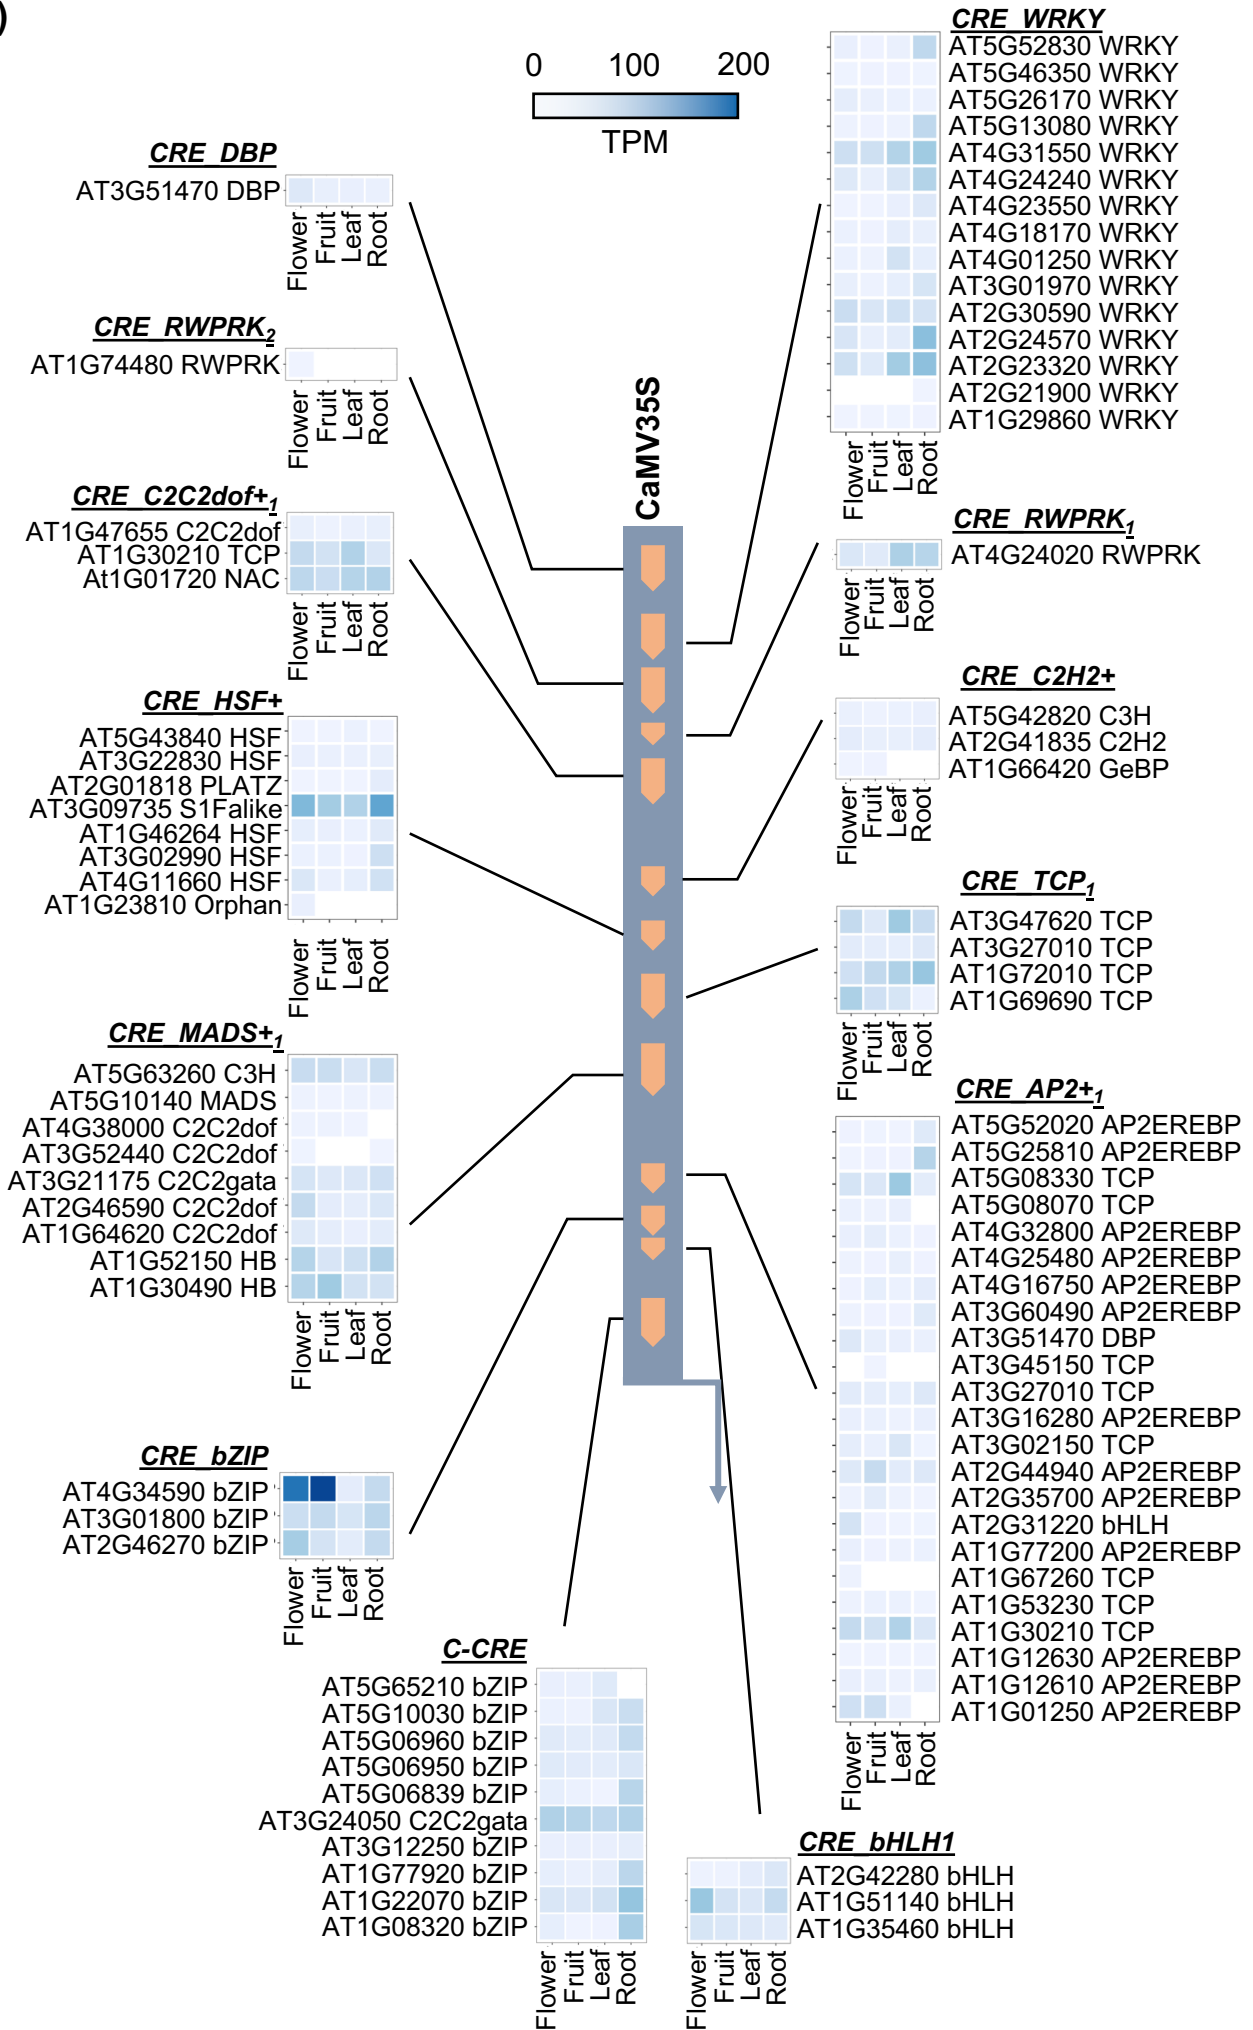



(2) **CRE CCAAT+**

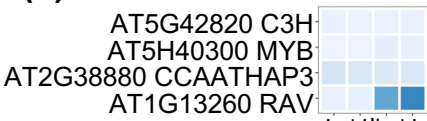

**CRE bHLH+**

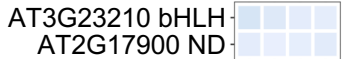

**CRE bHLH<sub>2</sub>**

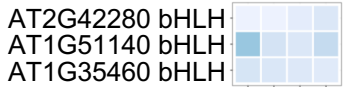

**CRE G2like**

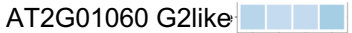

**CRE TCP<sub>3</sub>**

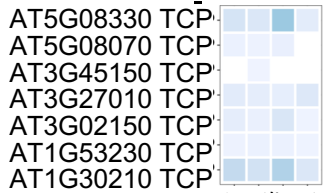

**CRE MADS<sub>2</sub>**

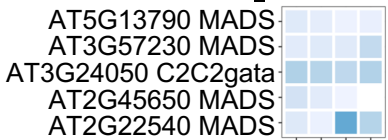

**CRE MYB+**

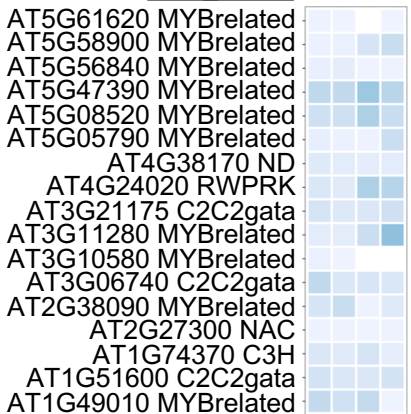

**CRE TCP<sub>2</sub>**

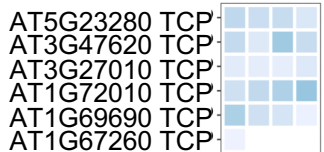

0 100 200

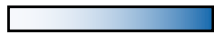

TPM

MMV

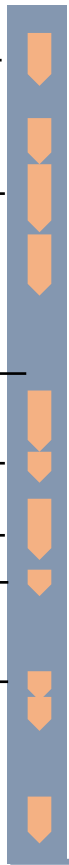

C-CRE

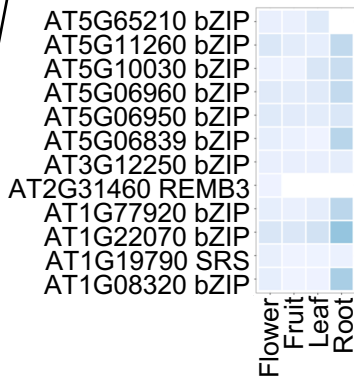

**CRE WRKY+**

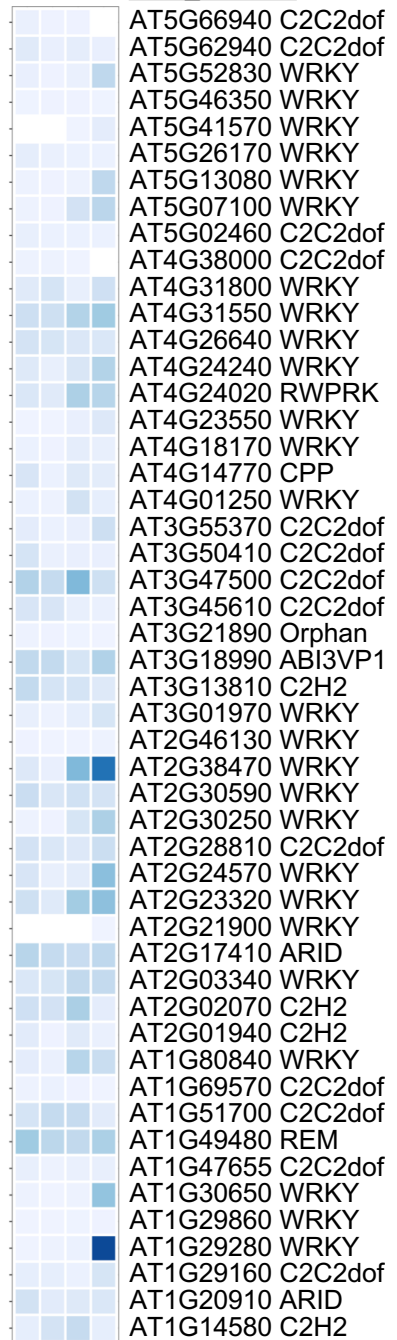

**CRE C2C2dof<sub>2</sub>**

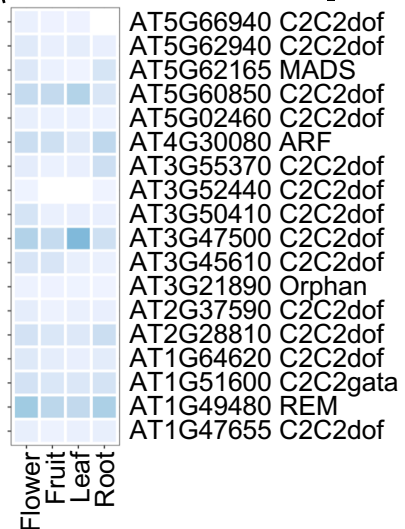

(3)

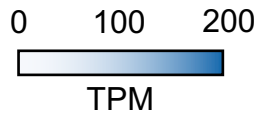

NOS

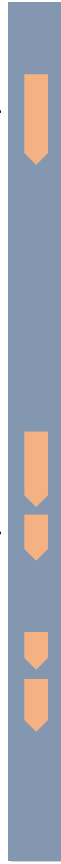

**CRE AP2+<sub>2</sub>**

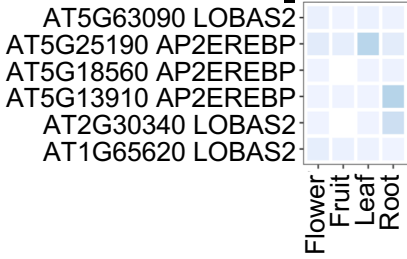

**C-CRE**

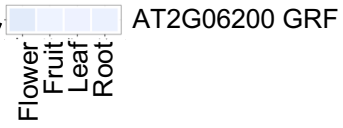

**CRE G2like+**

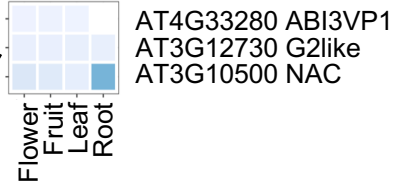

**CRE Homeobox**

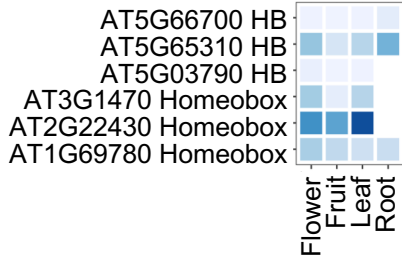

**CRE C2H2**

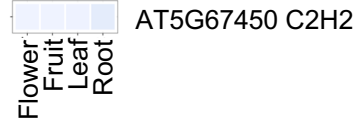



(5)

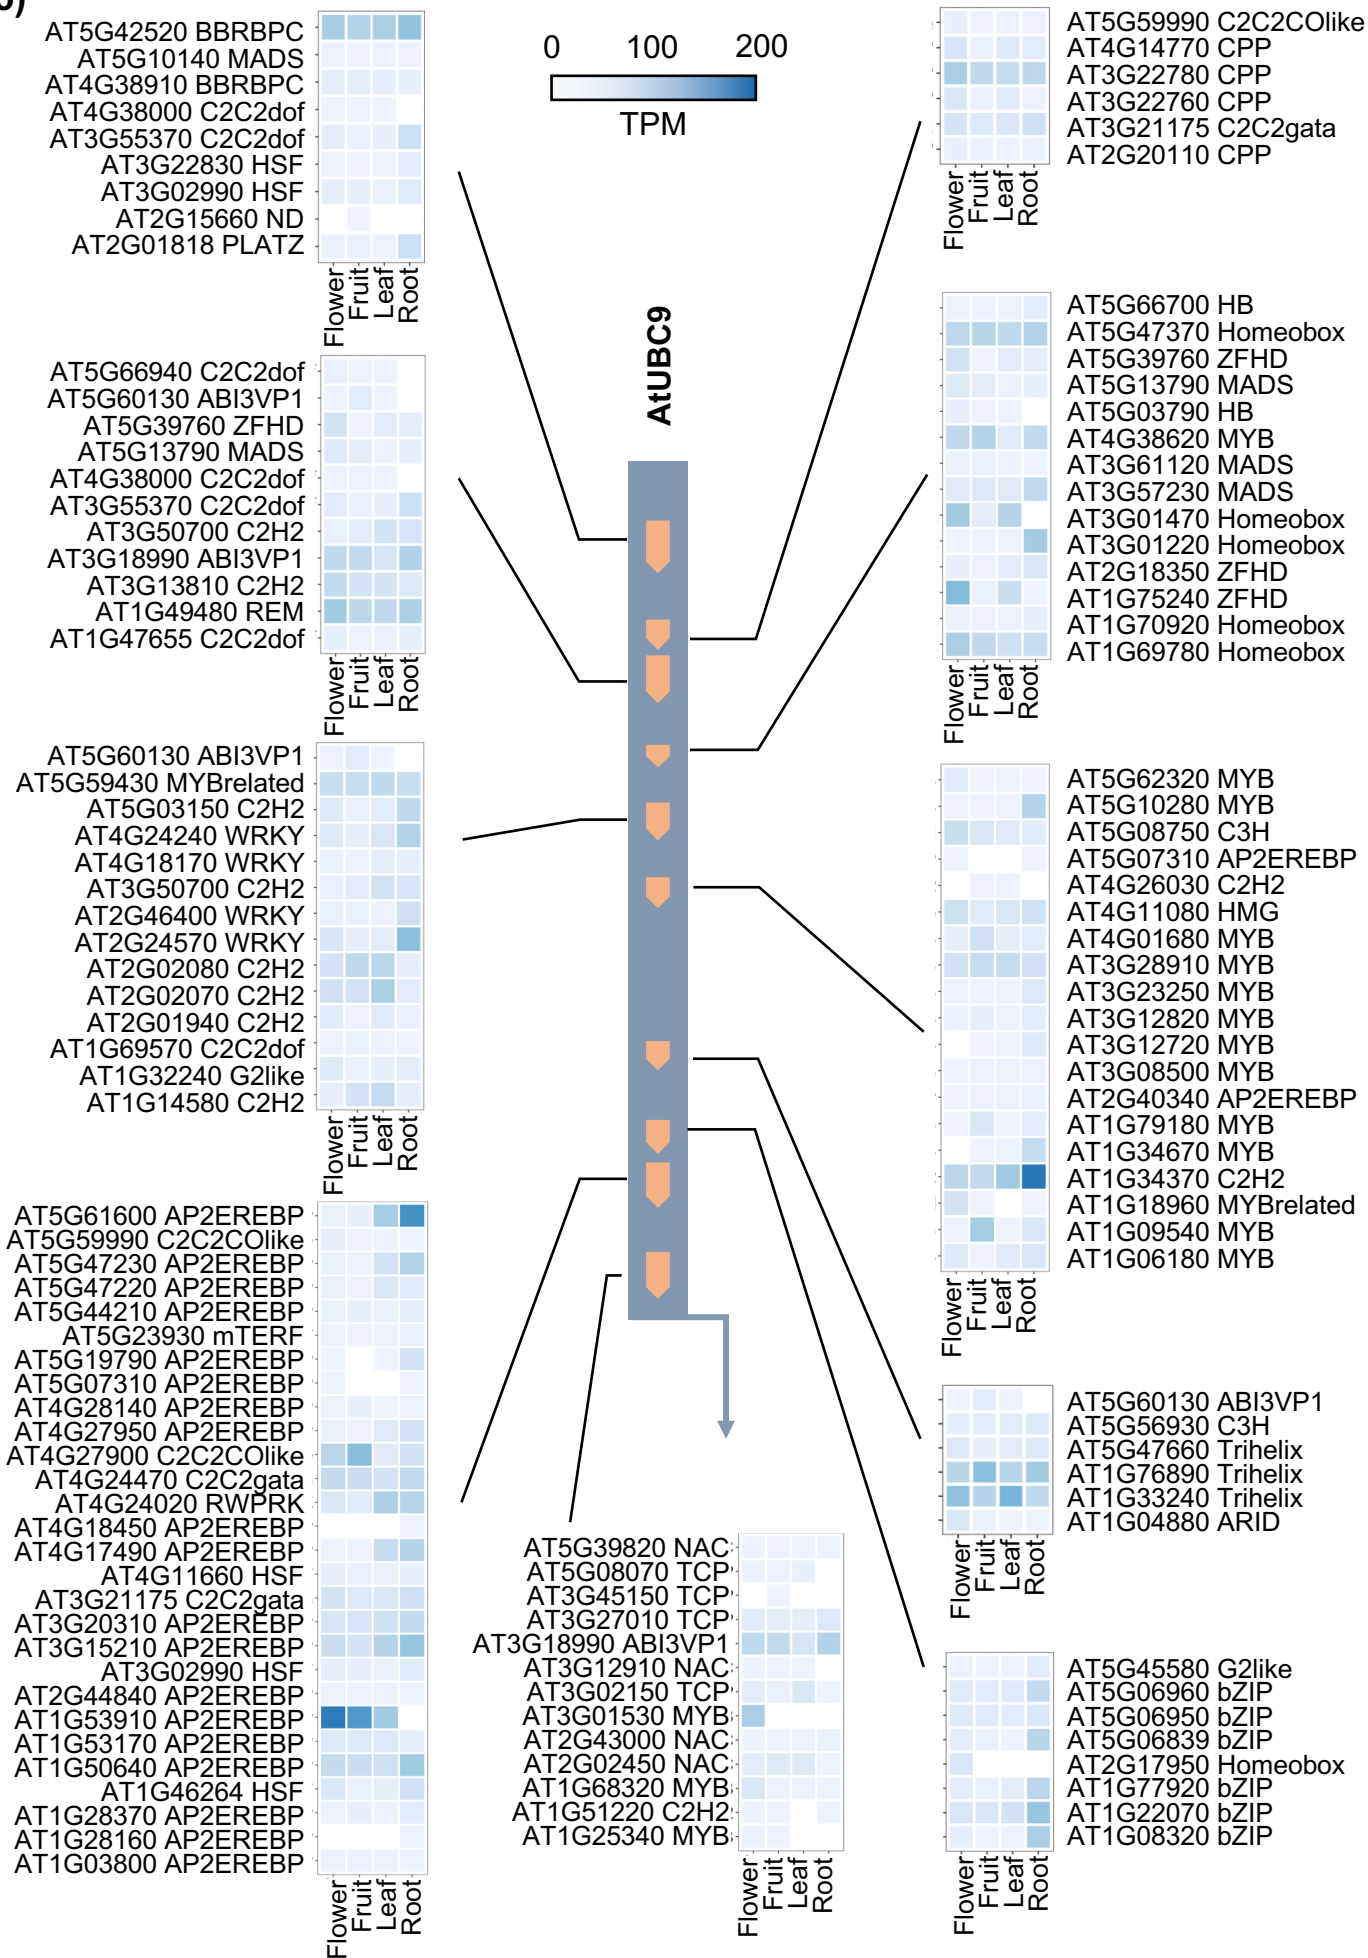



### Supplementary Data File 4

Multiple sequence alignment of a *cis*-regulatory element common to all 14 promoters from plant-infecting viruses and bacteria. The red box  highlights consensus binding motifs for the TGACG-motif binding (TGA) basic-leucine zipper (B-ZIP) transcription factors.

|         |   |   |   |   |   |   |   |   |   |   |   |   |   |   |   |   |   |   |   |   |   |   |   |   |   |   |   |   |   |
|---------|---|---|---|---|---|---|---|---|---|---|---|---|---|---|---|---|---|---|---|---|---|---|---|---|---|---|---|---|---|
| MMV     | A | T | G | A | C | G | T | A | A | G | C | C | A | T | G | A | C | G | T | C | T | A | A | T | C | C | C | A |   |
| CaMV35S | C | T | G | A | C | G | T | A | A | G | G | G | A | T | G | A | C | G | C | A | C | A | A | A | T | C | C | C | A |
| FMV     | A | A | A | A | C | G | T | A | A | G | C | G | C | T | G | A | C | G | T | A | T | G | A | T | T | T | C | A |   |
| PnCSV   | A | T | G | G | C | G | T | A | A | G | C | C | C | T | T | A | C | G | T | C | A | T | G | G | C | T | C | C |   |
| CsVMV   | A | T | G | A | C | G | T | A | A | G | C | A | C | T | G | A | C | G | A | C | A | A | C | A | A | T | G | A |   |
| AtuMAS  | G | T | G | A | C | G | C | T | C | G | C | G | G | T | G | A | C | G | C | C | A | T | T | T | C | G | C | C |   |
| AtuOCS  | A | A | A | A | C | G | T | A | A | G | C | G | C | T | T | A | C | G | T | A | C | A | T | G | G | T | C | G |   |
| SpVVCV  | G | T | A | T | C | C | T | T | A | G | C | C | G | T | T | A | A | G | C | A | T | C | A | T | G | T | C | C |   |
| RTBV    | A | A | G | A | T | G | C | T | A | G | C | C | A | T | G | T | G | G | T | A | G | C | A | T | G | T | G | A |   |
| ComYMV  | G | A | A | T | A | C | T | T | A | G | C | C | A | T | G | A | A | G | T | A | G | C | G | T | G | C | G | A |   |
| AtuNOS  | A | T | G | A | G | C | T | A | A | G | C | A | C | A | T | A | C | G | T | C | A | G | A | A | A | C | C | A |   |
| SbCMV   | A | T | G | T | A | T | A | G | A | G | C | A | A | G | G | A | G | G | C | C | C | A | T | G | G | C | C | A |   |
| GVCV    | A | A | G | A | A | A | G | A | G | G | A | A | A | G | A | A | G | A | G | A | C | C | A | T | G | T | G | C |   |
| BRRV    | A | A | A | A | T | G | A | A | A | G | C | A | T | T | A | A | A | G | T | T | A | C | T | C | C | G | A | A |   |

### Supplementary Data File 5

Deletion of many candidate *cis*-regulatory elements (CRE) had no significant impact on expression. Error bars = 2 x standard error; P-values were calculated using unpaired two-tailed Student's t-test; \*P<0.05, \*\*P< 0.01, \*\*\*P< 0.001; n=3

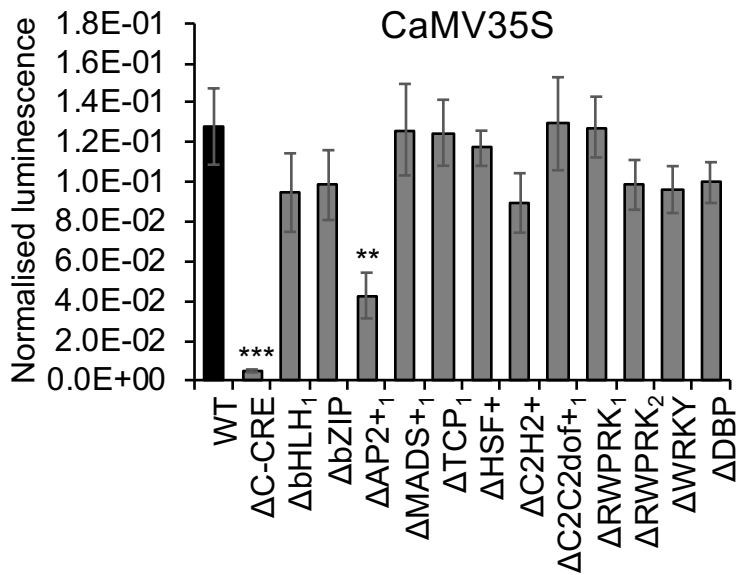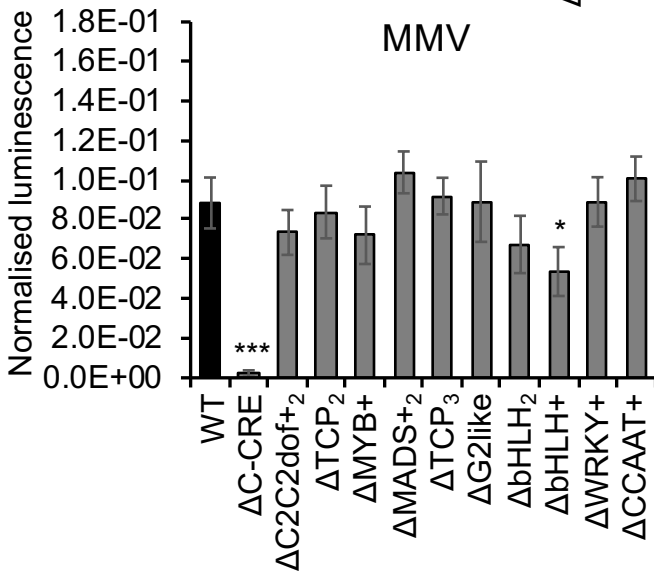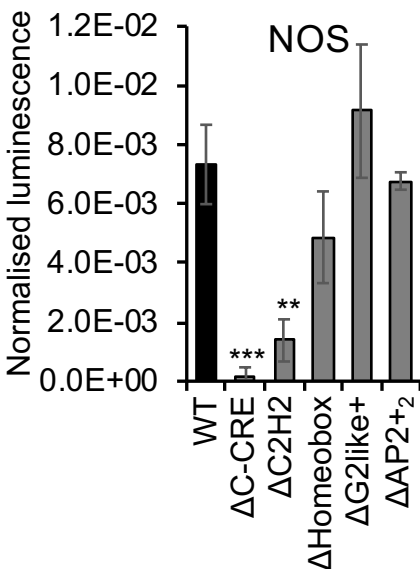

### Supplementary Data 6

Combining certain *cis*-regulatory elements (CREs) into the variable regions of MinS<sub>yn</sub> did not result in significant expression

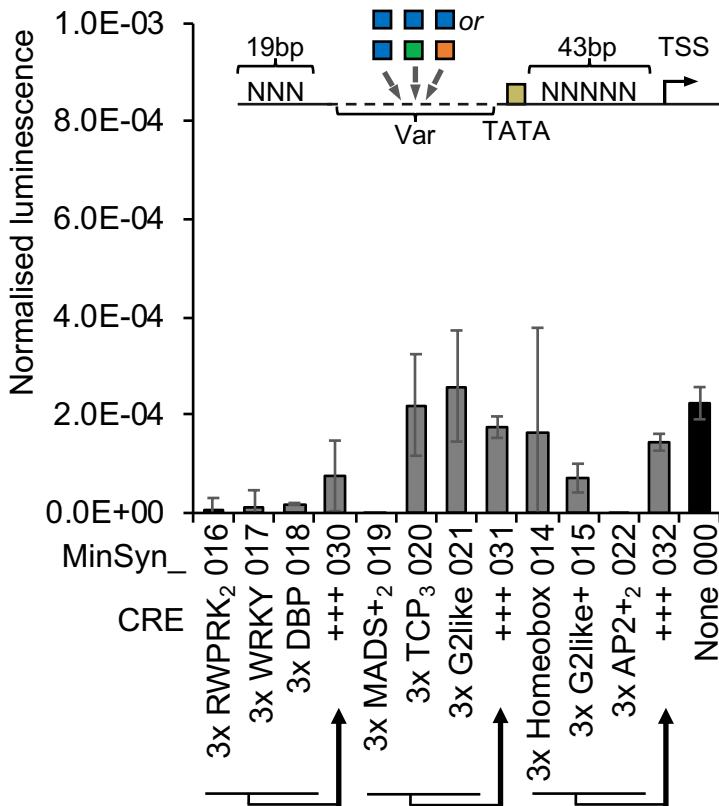



Supplementary Data 7. Sequences and predicted strengths of all computationally designed Minimal Synthetic Promoters (MinSyns)

>MinSyn\_1000|Strength:0.001329763  
GCGTGTTCGTTTTAGTGAGGTCAGAAGATCAAAGGGCTATAGGAGGACCGATGCTGATCTTGCCTGCCA  
GCCACTTGTGTCTGCTAGGAGCACACCAGCATGTGTTGATCACCAGCTGGCTCACTATATAAGGTTTT  
GCTATTCATTGAAAGCAGTAGTGACTGATTTGTATATA

>MinSyn\_1161|Strength:0.000223739  
GCGTGTTCGTTTTAGTGAGGTCAGAAGATCAAAGGGCTACACTATGCCCAATTAGGTTGTCTGCAAGCA  
AGTGGATGGCTATCAGCTTAGCAAGACCTCTACAACCTATATAAGGTTTTGCTATTCATTGAAAGCAGT  
AGTGACTGATTTGTATATA

>MinSyn\_1970|Strength:0.0003525  
GCGTGTTCGTTTTAGTGAGGGCTTTGTCAAAAAGCTAAAAAGATGATGCGTCTGCACCTCACATGTAGG  
CTATCAGCTTCACTATCAGCCTTGTGTACAGGGCTCACTGCTATATAAGGTTTTGCTATTCATTGAAA  
GCAGTAGTGACTGATTTGTATATA

>MinSyn\_1951|Strength:0.000375771  
GCGTGTTCGTTTTAGTGAGGAATTTTCGGGAAACCTCCTCGTCTACAAAACCTGGTACTTTTTCAACAAGC  
TTAGCAAGACCTCAAATATTTCTTGTGGTACTTGTGTACAGGGCTCACTGCTGCTTTGTCAAAAAGCTA  
AAAAAGATGATGCCTTGTGTACAGGGCTCACTCTATATAAGGTTTTGCTATTCATTGAAAGCAGTAGT  
GACTGATTTGTATATA

>MinSyn\_1490|Strength:0.000396386  
GCGTGTTCGTTTTAGTGAGGGCTTTGTCAAAAAGCTAAAAAGATGATGCGCACCTCACATGTAGGCTAT  
CAGCTTAGGTGGCTCCTACGATCTTGCAGCAAGTGGATGCGGTAGCTATATAAGGTTTTGCTATTCA  
TTGAAAGCAGTAGTGACTGATTTGTATATA

>MinSyn\_1225|Strength:0.000430833  
GCGTGTTCGTTTTAGTGAGGAGCAAGTGGATGCTTAGCAAGACCTCTACAAAACCTTTTTCAACAAGCAA  
CTATATAAGGTTTTGCTATTCATTGAAAGCAGTAGTGACTGATTTGTATATA

>MinSyn\_1108|Strength:0.000437209  
GCGTGTTCGTTTTAGTGAGGTCACTATCAGCCTCACATGTAGGCTAGCAAGTGGATGGAGGACCGATGC  
TGATCTTGCCTATATAAGGTTTTGCTATTCATTGAAAGCAGTAGTGACTGATTTGTATATA

>MinSyn\_1653|Strength:0.000456944  
GCGTGTTCGTTTTAGTGAGGGCTTTGTCAAAAAGCTAAAAAGATGATGCATGTAGGCTATCAGCTAACC  
ATTATTGCGCTCTACAAAACCTGGTCTATATAAGGTTTTGCTATTCATTGAAAGCAGTAGTGACTGATT  
TGTATATA

>MinSyn\_1138|Strength:0.00047  
GCGTGTTCGTTTTAGTGAGGACCCACTTGTGTAGGAGGACCGATGCTGATCTTGTCTTTGTCAAAAAGCT  
AAAAAGATGATGCACATGTCTATATAAGGTTTTGCTATTCATTGAAAGCAGTAGTGACTGATTTGTA  
TATA

>MinSyn\_1093|Strength:0.000487407  
GCGTGTTCGTTTTAGTGAGGGCTTTGTCAAAAAGCTAAAAAGATGATGCCTGGTACTTGTGTACAGGGT  
GAAGCATCTCCGCTCCTATATAAGGTTTTGCTATTCATTGAAAGCAGTAGTGACTGATTTGTATATA

>MinSyn\_1141|Strength:0.000491045  
GCGTGTTCGTTTTAGTGAGGAGCAAGTGGATACTGCTAGGACAGCCACTTGTGTTATCAGCTTAGCAAG  
ACCTCTACAAAACCTCTATATAAGGTTTTGCTATTCATTGAAAGCAGTAGTGACTGATTTGTATATA

>MinSyn\_1944|Strength:0.000491291  
GCGTGTTCGTTTTAGTGAGGAATTTTCGGGAAACCTCCTCGGTCTGCACCTCAGCAAGTGGATTCGCGGT  
AGGAAAAAGAAGAGGTTATGCCCAATTAGGTTGTCTGCACCTCAGCTTTGTCAAAAAGCTAAAAAGAT  
GATGCGGAGGACCGATGCTGATCTTGCCTGCCTTGTATCGAAAGGACAGTAGCTATCAGCTTAGCAAGC  
TATATAAGGTTTTGCTATTCATTGAAAGCAGTAGTGACTGATTTGTATATA

>MinSyn\_1994|Strength:0.000494737  
GCGTGTTCGTTTTAGTGAGGAGCAAGTGGATATGTAGGCTATCAGCTAGGTGGCTCCTACACTATGCC  
AATTAGGTTGTCTCTATATAAGGTTTTGCTATTCATTGAAAGCAGTAGTGACTGATTTGTATATA

>MinSyn\_1333|Strength:0.000499115  
GCGTGTTCGTTTTAGTGAGGAGCAAGTGGATCTCACTATCAGCTCTTGCCTGCCTTGATGATCTATATA

AGGTTTTGCTATTCATTGAAAGCAGTAGTACTGATTTGTATATA  
>MinSyn\_1463|Strength:0.000500764  
GCGTGTTCGTTTTAGTGAGGTTATGACCCCGCCGATGACGCGGGACGCGGTAGGTCACGACCACTATG  
CCCTTTTCAACAAGGTTGTCTGCACCTCAGCTTTGTCAAAAAGCTAAAAAAGATGATGCTCAGCAAGTG  
GATGAGGACCGATGCTGATCTGGTGGAGCACGACACAAAAGTGGTACTTGTGTACAGGGCTCCTATAT  
AAGTTTTGCTATTCATTGAAAGCAGTAGTACTGATTTGTATATA  
>MinSyn\_1474|Strength:0.000522222  
GCGTGTTCGTTTTAGTGAGGCTTTGTCAAAAAGCTAAAAAAGATGATGCTCTTGCCTGCCTCAGCCACT  
TGTGTTCTATATAAGGTTTTGCTATTCATTGAAAGCAGTAGTACTGATTTGTATATA  
>MinSyn\_1109|Strength:0.000528434  
GCGTGTTCGTTTTAGTGAGGTTTTCAACAACCTGCCTTGAACCATTATTGCGGGACCGATTCCATCAAC  
AAATAATCCAAGTAAGACCAGCCACTTGTGTGACCACTATGCCCAATTAGGAGCAAGTGGATCTACAA  
AACTGGTACTGCTTTGTCAAAAAGCTAAAAAAGATGATGCTAGCTATATAAGGTTTTGCTATTCATTGA  
AAGCAGTAGTACTGATTTGTATATA  
>MinSyn\_1971|Strength:0.000548905  
GCGTGTTCGTTTTAGTGAGGCGAGTGGTCCCTCCACTATGCCCAATAGCAAGTGGATAGGTTGTCTGCAC  
CTCACATGTAGGCTATCCTATATAAGGTTTTGCTATTCATTGAAAGCAGTAGTACTGATTTGTATAT  
A  
>MinSyn\_1992|Strength:0.000553661  
GCGTGTTCGTTTTAGTGAGGTCCATCAACAATAATCCAAGTAAGTTGTCTGCACCTCACATGTGCTTT  
GTCAAAAAGCTAAAAAAGATGATGCCGCGGTAGGTCACGACCACTATGCCCAATTGGTGGAGCACGACA  
TACAAAAGTGGTACTATATAAGGTTTTGCTATTCATTGAAAGCAGTAGTACTGATTTGTATATA  
>MinSyn\_1293|Strength:0.000582789  
GCGTGTTCGTTTTAGTGAGGTCCATCAACAATAATCCAAGTAAGATTAGGTTGAACCATTATTGCGTG  
ATCTTGGCACACCAGCATGTGTTGATCACCAGCTAGGTCACGACCACTATGCCCAATTGCTTTGTCAA  
AAGCTAAAAAAGATGATGCCCTCTACAAAAGTGGTACTTGTCTATATAAGGTTTTGCTATTCATTGAA  
AGCAGTAGTACTGATTTGTATATA  
>MinSyn\_1468|Strength:0.0005875  
GCGTGTTCGTTTTAGTGAGGAGCAAGTGGATGACCTCTACAAAAGTGGTACTTGTGGGAAAAAGAAGAG  
GTAGGGCTCTATATAAGGTTTTGCTATTCATTGAAAGCAGTAGTACTGATTTGTATATA  
>MinSyn\_1511|Strength:0.000590545  
GCGTGTTCGTTTTAGTGAGGGCACACCAGCATGTGTTGATCACCAGCTGCTGATCTTGCCTGCCTTGAC  
AAATATTTCTTGTCTTAGCAAGACCTTAGCTTTGTCAAAAAGCTAAAAAAGATGATGCCTCACTGCAA  
CCATTATTGCGAGGTTGTCTGCACCTCACATGTAGGCTATCTATATAAGGTTTTGCTATTCATTGAAA  
GCAGTAGTACTGATTTGTATATA  
>MinSyn\_1655|Strength:0.000592123  
GCGTGTTCGTTTTAGTGAGGTTTTCAACAACCTTAGCAAGACCTCTACAAAAGTGGTACTAACCACGTCT  
ACAAAAGTGGTACTTGTGTACAGGGCTATATAAGGTTTTGCTATTCATTGAAAGCAGTAGTACTGA  
TTTGTATATA  
>MinSyn\_1053|Strength:0.000592396  
GCGTGTTCGTTTTAGTGAGGGCACACCAGCATGTGTTGATCACCAGCTTGTATGACCCCGCCGATGA  
CGCGGGACTGGTACGCTTTGTCAAAAAGCTAAAAAAGATGATGCTAGGTCACGACCACTATGCCCAATT  
AGGTCTATATAAGGTTTTGCTATTCATTGAAAGCAGTAGTACTGATTTGTATATA  
>MinSyn\_1232|Strength:0.000601829  
GCGTGTTCGTTTTAGTGAGGAACCATTATTGCGCCACTATGCCCAATTAGGTTGTCAAAAATGTCAAAG  
ATATGATAAGCAAGTGGATCCCAATTAGGTTGTCTGCACCTCACCTATATAAGGTTTTGCTATTCATT  
GAAAGCAGTAGTACTGATTTGTATATA  
>MinSyn\_1677|Strength:0.000611834  
GCGTGTTCGTTTTAGTGAGGTGAAGCATCTTCCCTCACTGCTAGGAGGACCGATGCTGATCTTGTGGTGG  
AGCACGACAGGACCGATGCTGATCTTGCCTGCCTGCTATATAAGGTTTTGCTATTCATTGAAAGCAG  
TAGTACTGATTTGTATATA  
>MinSyn\_1526|Strength:0.000638568  
GCGTGTTCGTTTTAGTGAGGTGAAGCATCTTCCGAGGACCGATGCTGATCTTGCCTGCCAAAAATGTCA  
AAGATATAGGCTATCAGCTTAGCAAGACCTCTACAAAACCACGTCTACAAAGACCTCTACAAAAGTGG

TACTTGTGTCTATATAAGGTTTTGCTATTCATTGAAAGCAGTAGTGACTGATTTGTATATA  
>MinSyn\_1142|Strength:0.000639456  
GCGTGTTCGTTTTAGTGAGGTCAGAAGATCAAAGGGCTAACAGGGCTCACTGCTAGGAGGACGCTTTGT  
CAAAAGCTAAAAAGATGATGCTTGATCTATATAAGGTTTTGCTATTCATTGAAAGCAGTAGTGACTG  
ATTTGTATATA  
>MinSyn\_1899|Strength:0.000647599  
GCGTGTTCGTTTTAGTGAGGTCATATCAGCTTAGCAAGACCTCTACAAAAGCTGGTACTTGCAGTGGTC  
CCTCCACGAGGACCGATGCTGATCTTGCAGCAAGTGGATTAGGTCACGACCACTATGCCCAATTATGA  
AGCATCTTCCCTTGTGTACAGGGCTCACTGCGCTTTGTCAAAAGCTAAAAAGATGATGCTAGGTCTT  
ATGACCCCGCCGATGACGCGGGAGCCCAATTAGGTTGTCTGCACCTATATAAGGTTTTGCTATTCAT  
TGAAAGCAGTAGTGACTGATTTGTATATA  
>MinSyn\_1404|Strength:0.000648276  
GCGTGTTCGTTTTAGTGAGGTGGTGGAGCACGACACCTCTACAAAAGCTGGTAGCAAGTGGATGCTCTAT  
ATAAGGTTTTGCTATTCATTGAAAGCAGTAGTGACTGATTTGTATATA  
>MinSyn\_1967|Strength:0.000651825  
GCGTGTTCGTTTTAGTGAGGATTGCGATAAAGGAAAGGCTTGCCGCTTTGTCAAAAGCTAAAAAGATG  
ATGCAGTCCACGACCACCTATATAAGGTTTTGCTATTCATTGAAAGCAGTAGTGACTGATTTGTATAT  
A  
>MinSyn\_1294|Strength:0.00065369  
GCGTGTTCGTTTTAGTGAGGGTGGGAGCCACAAAAGCTGGTACTTGTGTACAGGGCTGGTGGAGCACGA  
CAGCTATCAGCTTAGCAAGACCTCTACAAAGCTTTGTCAAAAGCTAAAAAGATGATGCCAATTAGGT  
TGTCTGCACCTCACATGTAGGGCACACCAGCATGTGTTGATCACCAGCTGCTATCAGCTTAGCAAGAA  
GCAAGTGGATAAAAAGCTGCAGTGGTCCCTCCACGTACGACCACTATGCCCAATCTATATAAGGTTTTG  
CTATTCATTGAAAGCAGTAGTGACTGATTTGTATATA  
>MinSyn\_1559|Strength:0.000657906  
GCGTGTTCGTTTTAGTGAGGCAGCCACTTGTGTACGACCACTATGCCCAATTTCAGAAGATCAAAGGG  
CTACTACAAAAGCTGGTACTTAGCAAGTGGATTCTGCACCTCACATGTAGGCTATATAAGGTTTTGCTA  
TTCATTGAAAGCAGTAGTGACTGATTTGTATATA  
>MinSyn\_1242|Strength:0.000660391  
GCGTGTTCGTTTTAGTGAGGATGAGCTAAGCACATACGTCAGCCTCACATGAAAAATGTCAAAGATATT  
GTCTGCACCTCACATGTACAAATATTTCTTGTCTCACATGTAAGATTGATGAAAAGTCAAAAACAAA  
ATCAATTATTGCTGATCTTAGCAAGTGGATCTGCACCTCACATGTAGGCTATCATTTTCAACAACACT  
GCTAGGAGGACCGATGCTGCTTTGTCAAAAGCTAAAAAGATGATGCTAGGAGAACCATTATTGCGGG  
TTGTCTGCACCTCACATGTAGGCTATCAAGGTGGCTCCTACTGTACAGGGCTCACTGCTAGGAGGACC  
CTATATAAGGTTTTGCTATTCATTGAAAGCAGTAGTGACTGATTTGTATATA  
>MinSyn\_1451|Strength:0.000668493  
GCGTGTTCGTTTTAGTGAGGAACCATTATTGCGTAGGTTGTGGTGGAGCACGACAGCTAGGAGGACCGA  
TGCTGATCTTGAGCAAGTGGATTGATCTATATAAGGTTTTGCTATTCATTGAAAGCAGTAGTGACTGA  
TTTGTATATA  
>MinSyn\_1068|Strength:0.000673512  
GCGTGTTCGTTTTAGTGAGGTCAGAAGATCAAAGGGCTAAGGGCTCACTGCTCACTATCAGCAACTGGT  
ACTTGTGTACAGGGCTCACTGCTATTGCGATAAAGGAAAGGGTCTTTGTCAAAAGCTAAAAAGATG  
ATGCTGCTGATCTTCTATATAAGGTTTTGCTATTCATTGAAAGCAGTAGTGACTGATTTGTATATA  
>MinSyn\_1039|Strength:0.000680398  
GCGTGTTCGTTTTAGTGAGGAAGATTGATGAAAAGTCAAAAACAAAATCAATTATTCACATGTAGGCT  
CCATCAACAATAATCCAAGTAAGGGAGCTTTGTCAAAAGCTAAAAAGATGATGCAAGACCTCTACA  
AACTGGTACTTGTGTATCACTATCAGCCGATGCTGATCTTGCCTGCCTTGATGCTATATAAGGTTT  
TGCTATTCATTGAAAGCAGTAGTGACTGATTTGTATATA  
>MinSyn\_1987|Strength:0.000681828  
GCGTGTTCGTTTTAGTGAGGAACCACGCTCTACAACAGCTTAGCAAGACCTCTAGTGGGAGCCACCACTT  
AGCAAGACCTCTACAAAATTTTCGGGAAACCTCCTCGCTTAGCAAGAGGTGGCTCCTACCCCAATTAT  
TTTCAACAATAGCAAGGCTTTGTCAAAAGCTAAAAAGATGATGCGACCGATGCTGATCTTGCCTGCC  
TCTATATAAGGTTTTGCTATTCATTGAAAGCAGTAGTGACTGATTTGTATATA  
>MinSyn\_1055|Strength:0.000684232

GCGTGTTCGTTTTAGTGAGGAACCATTATTGCGTAGGCTATCATCCTTACCGCTATGGGTAAGATTCTG  
CTAGGAGGACCGATGTGGTGGAGCACGACTGCTAGGAGGACCGTGGGAGCCACCAAGGAGGACCGA  
AAAATGTCAAAGATAGCCCAATTAGGTTTCAGCCACTTGTGTATCAGCTTAGCAGCTTTGTCAAAGCT  
AAAAAAGATGATGCCACTGCTAGGAGGACCGATGCTGATCTATATAAGGTTTTGCTATTCATTGAAAG  
CAGTAGTGACTGATTTGTATATA

>MinSyn\_1316|Strength:0.000691622

GCGTGTTCGTTTTAGTGAGGTCCATCAACAAATAATCCAAGTAAGCTCACATGTAGGCTAATCCTTACC  
GCTATGGGTAAGATTCATTGCGATAAAGGAAAGGGCTATCAGCTTAGCAAGACCAGCAAGTGGATTAC  
TTGTGTACAGGGCTCACTGCTAGGAGGCTATATAAGGTTTTGCTATTCATTGAAAGCAGTAGTGACTG  
ATTTGTATATA

>MinSyn\_1214|Strength:0.000693173

GCGTGTTCGTTTTAGTGAGGCAAATATTTCTTGTGGTAGTGGTGGAGCACGACATGCTACAGCCACTTG  
TGTGGACCGATGCTGATCTTGCCTGCCTTGATTGCGATAAAGGAAAGGAGGACCGATGCTGATTATGA  
CCCCCGCCGATGACGCGGGACACCTCATATGATAGGCTATCAGCTTGCTTTGTCAAAGCTAAAAAGA  
TGATGCGACCGATGCCTATATAAGGTTTTGCTATTCATTGAAAGCAGTAGTGACTGATTTGTATATA

>MinSyn\_1284|Strength:0.000693445

GCGTGTTCGTTTTAGTGAGGAAAAATGTCAAAGATATGCTGATCTCCATCAACAAATAATCCAAGTAAG  
ACCTCACATGTAGGCTGCACACCAGCATGTGTTGATCACCAGCTGCTATTGCGATAAAGGAAAGGGGA  
GGACCGATGCTGATCTTTTTCAACAACCTGGTACTTGTGTACAGGGCTCACTATCGAAAGGACAGTAT  
AGCAAGACCTCTACAAAAGCTTTGTCAAAGCTAAAAAAGATGATGCCTGCACCTCACATGTAGGCTA  
TCCTATATAAGGTTTTGCTATTCATTGAAAGCAGTAGTGACTGATTTGTATATA

>MinSyn\_1957|Strength:0.000707062

GCGTGTTCGTTTTAGTGAGGAAAAATGTCAAAGATACAGGGCTCACTGCTAGGAGTTATGACCCCGCC  
GATGACGCGGGACTATGCAGCCACTTGTGTCAAACCTGGTACTTGTGTACAAAGATTGATGAAAAGTC  
AAAAACAAAATCAATTATTTGTCTGCACCTCACATGTAGGCTAGCTTTGTCAAAGCTAAAAAAGAT  
GATGCGTCACGACCCAAATATTTCTTGTAACTGGTACTTAGCAAGTGGATAACTGGTACTTGTGTACA  
GGGCTCACTCTATATAAGGTTTTGCTATTCATTGAAAGCAGTAGTGACTGATTTGTATATA

>MinSyn\_1050|Strength:0.000707788

GCGTGTTCGTTTTAGTGAGGAATTTCCGGAAACCTCCTCGATTAGGTTGTCTGCACCTCATCACTATCA  
GCCACATGTAGGCTATCAGCTTAGCAAGACCTGAAGCATCTCCGATCTTGCTGCCTTGATGACAGT  
GGTCCCTCCACCTGCACCTCACATGTAGGCTATCAGCTTACTATATAAGGTTTTGCTATTCATTGAAA  
GCAGTAGTGACTGATTTGTATATA

>MinSyn\_1433|Strength:0.000710072

GCGTGTTCGTTTTAGTGAGGAGCAAGTGGATTACAGGGCTCACTGCTAGGAGGACCGATGCAATTTCCG  
GAAACCTCCTCGAGGACCGCTATATAAGGTTTTGCTATTCATTGAAAGCAGTAGTGACTGATTTGTAT  
ATA

>MinSyn\_1410|Strength:0.00071462

GCGTGTTCGTTTTAGTGAGGGCTTTGTCAAAGCTAAAAAAGATGATGCTACTTGTGTACAGGGCTCTC  
TCTGCCGACAGTGGTCCCAAACACATGTAGGCTATCAGCTTAGCAAGACCTCTATATAAGGTTTTGCT  
ATTCATTGAAAGCAGTAGTGACTGATTTGTATATA

>MinSyn\_1566|Strength:0.000715217

GCGTGTTCGTTTTAGTGAGGGCTTTGTCAAAGCTAAAAAAGATGATGCGACCTCTAAATTTCCGGGAAA  
CCTCCTCGGCAAGACCTCCTATATAAGGTTTTGCTATTCATTGAAAGCAGTAGTGACTGATTTGTATA  
TA

>MinSyn\_1264|Strength:0.000718824

GCGTGTTCGTTTTAGTGAGGGCTTTGTCAAAGCTAAAAAAGATGATGCCTTGTGTACAGGAGCAAGTG  
GATTCTGCACCTCACATGTAGGCTTCCATCAACAAATAATCCAAGTAAGCTATATAAGGTTTTGCTA  
TTCATTGAAAGCAGTAGTGACTGATTTGTATATA

>MinSyn\_1806|Strength:0.000722811

GCGTGTTCGTTTTAGTGAGGTTTTCAACAATTGTCTGCACCTCACATGTAGGCTATAGCAAGTGGATGT  
ACTTGTGTATCAGAAGATCAAAGGGCTATGCCTATATAAGGTTTTGCTATTCATTGAAAGCAGTAGTG  
ACTGATTTGTATATA

>MinSyn\_1934|Strength:0.000738027

GCGTGTTCGTTTTAGTGAGGAACCATTATTGCGCTATCGAAAGGACAGTATCGCGGTAGGTCACGACCA

CCAGTGGTCCCTCCACCTGCACCTCACATGTAGGCTATCAGCTTATGAAGCATCTTCCGCGGTAGGTC  
ACGACCCTATGCTATATAAGGTTTTGCTATTCATTGAAAGCAGTAGTGACTGATTTGTATATA

>MinSyn\_1554|Strength:0.000738571

GCGTGTTCGTTTTAGTGAGGTGAAGCATCTTCCCTCACATGTAGGCTATCAATTGCGATAAAGGAAAGG  
CTCACTGCTAGGAGGACCGATGCTGATCTTCTATATAAGGTTTTGCTATTCATTGAAAGCAGTAGTGA  
CTGATTTGTATATA

>MinSyn\_1265|Strength:0.000742574

GCGTGTTCGTTTTAGTGAGGAACCACGTCTACAACCTCACATGTAGGCTATCAGCTTAGCACAGTGG  
TCCCTCCACTATCCTTACCGCTATGGGTAAGATTCATGTAGGCTATCAGCTTAGCAAGAGGAAAAAGA  
AGAGGTGATGCTGATCTTGCCTGCCTTGATAGCAAGTGGATTCTTGCCTGCCTTGCTATATAAGGTTT  
TGCTATTCATTGAAAGCAGTAGTGACTGATTTGTATATA

>MinSyn\_1983|Strength:0.000743086

GCGTGTTCGTTTTAGTGAGGATCGAAAGGACAGTAACATGTAGGCTATCAGCTTAGCAACAGCCACTTG  
TGTTAGAGCAAGTGGATAATTAGGTTGCTGCACCTCACATGTAGGAATTTCCGGAAACCTCCTCGTA  
TGCCCAATTAGCTATATAAGGTTTTGCTATTCATTGAAAGCAGTAGTGACTGATTTGTATATA

>MinSyn\_1599|Strength:0.000744035

GCGTGTTCGTTTTAGTGAGGTTATGACCCCGCCGATGACGCGGGATTAGCAAGACCAACCATTATTGC  
GACTTGTGTACAGGGCTCACTGCTAGGAGAGGTGGCTCCTACTACTTGTGTACAGGGCTCACTGCTAG  
GCTATATAAGGTTTTGCTATTCATTGAAAGCAGTAGTGACTGATTTGTATATA

>MinSyn\_1146|Strength:0.000744583

GCGTGTTCGTTTTAGTGAGGTTATGACCCCGCCGATGACGCGGGAGGCTATCAGCTTAGCAAAAAATG  
TCAAAGATAGTACTTGTGTGGTGGAGCACGACAAGTCTAGGAGGACCGATGCATCGAAAGGACAGTA  
GGTCACGACCGCTTTGTCAAAGCTAAAAAGATGATGCCACTGCTAGGAGGCTATATAAGGTTTTGC  
TATTCATTGAAAGCAGTAGTGACTGATTTGTATATA

>MinSyn\_1014|Strength:0.000744836

GCGTGTTCGTTTTAGTGAGGATTGCGATAAAGGAAAGGCACTAAAGATTGATGAAAAGTCAAAAAACAA  
AATCAATTATAGACCTCTACAAAAGTGGTACTTGTGTACAAATTTCCGGAAACCTCCTCGGTACAGGG  
CTCACTGCTAGGGCTTTGTCAAAGCTAAAAAGATGATGCACCTCTAGGAAAAAGAAGAGGTTGGTA  
CTTGTGTACAGGGCTCACTGCCTATATAAGGTTTTGCTATTCATTGAAAGCAGTAGTGACTGATTTGT  
ATATA

>MinSyn\_1890|Strength:0.000748249

GCGTGTTCGTTTTAGTGAGGATCCTTACCGCTATGGGTAAGATTGGCTATCAGCTTAGCAAGACCTGGA  
AAAAGAAGAGGTTGGTACTTGTGTACAGGGCTCACTGCTAGAGCAAGTGGATAGCAAGACCTCTACAA  
AACTGGTAGTGGGAGCCACCACTCACATGTAGGGCTTTGTCAAAGCTAAAAAGATGATGCCAGCTT  
AGGTGGCTCCTACGGACCGATGCTGATCTCCATCAACAAATAATCCAAGTAAGGTCACGACCACTATG  
CCCAATTAGCTATATAAGGTTTTGCTATTCATTGAAAGCAGTAGTGACTGATTTGTATATA

>MinSyn\_1323|Strength:0.000757558

GCGTGTTCGTTTTAGTGAGGTCACTATCAGCCTAAGATTGATGAAAAGTCAAAAAACAAAATCAATTAT  
GTAGGCTATCAGCTTAGCAAGACCTGGTGGAGCACGACAGGACCGATGCTGATCTTGCCTGCCTTGAT  
GAGCAAGTGGATCCGATGCTGATCTTGCCTGCCTCCATCAACAAATAATCCAAGTAAGCAATTAGGGC  
TTTGTCAAAGCTAAAAAGATGATGCACCTATATAAGGTTTTGCTATTCATTGAAAGCAGTAGTGACT  
GATTTGTATATA

>MinSyn\_1926|Strength:0.000764072

GCGTGTTCGTTTTAGTGAGGGGAAAAAGAAGAGGTGGTGGGAGCCACCAAAAAGTGGTACTTGTGTACA  
GAACCATTATTGCGACTGCTAGGAGGACCGATGAGGTGGCTCCTACCGATGCTGCTTTGTCAAAGCT  
AAAAAGATGATGCGCTCACTGCTATCGAAAGGACAGTACCTTGACTATATAAGGTTTTGCTATTCAT  
TGAAAGCAGTAGTGACTGATTTGTATATA

>MinSyn\_1816|Strength:0.000765068

GCGTGTTCGTTTTAGTGAGGTGAAGCATCTTCCCTACAAAAGTGGTACTTGTGATTGCGATAAAGGAAA  
GGGCTAGGAGGACCGATGCTGATCTTCTATATAAGGTTTTGCTATTCATTGAAAGCAGTAGTGACTGA  
TTTGTATATA

>MinSyn\_1963|Strength:0.000769167

GCGTGTTCGTTTTAGTGAGGAGGTGGCTCCTACAGGGCTCACTGCTAGGAGAAGATTGATGAAAAGTCA  
AAAACAAAATCAATTATCAAAAAGTGGTACTTGTGTACAGGGCTTGGTGGAGCACGACAAGGGCTATC

CTTACCGCTATGGGTAAGATTTGCCAATTAGGTTTTCAACAACCTCTACAAAACCTGGTACTTGGCTT  
TGTCAAAAGCTAAAAAGATGATGCCCTCACATGTAGCTATATAAGGTTTTGCTATTCATTGAAAGCA  
GTAGTGACTGATTTGTATATA

>MinSyn\_1086|Strength:0.000778243

GCGTGTTCGTTTTAGTGAGGTGAAGCATCTCCGTCACGACCACTATGCCATCCTTACCGCTATGGGTA  
AGATTGGTACTTGTGTACAGGGAAAAATGTCAAAGATATACTTGTGTACAGGGCTTATGACCCCGCC  
GATGACGCGGGACAATTAGGTTGTCTGCACCTATTGCGATAAAGGAAAGGGATGCTGATCGAAAGGAC  
AGTAGTAGGCTATCAGCTTAGCAGGAAAAAGAAGAGGTTTTGCCTGCCTTGAGCTTTGTCAAAGCTAA  
AAAAGATGATGCGGTACTTGTGTACAGGGCTCACTGCTAGCTATATAAGGTTTTGCTATTCATTGAAA  
GCAGTAGTGACTGATTTGTATATA

>MinSyn\_1973|Strength:0.000781616

GCGTGTTCGTTTTAGTGAGGAAAAATGTCAAAGATACTCTACAAAACCTGGTACTTTCAGAAGATCAAAG  
GGCTAGGAGGACCGATGCTGATCTTGCCTGCCTTGCTATATAAGGTTTTGCTATTCATTGAAAGCAGT  
AGTGACTGATTTGTATATA

>MinSyn\_1667|Strength:0.000784739

GCGTGTTCGTTTTAGTGAGGGCACACCAGCATGTGTTGATCACCAGCTGCTTAGCAAGGTGGCTCCTAC  
GTTGTCTGCACCTCACAAAATGTCAAAGATAGCACCTCACATGTAGGATTGCGATAAAGGAAAGGTG  
CTAGGAGGACCGATGCTGATCTTGTGAGAAGATCAAAGGGCTATAGGTTGTCTGCGCTTTGTCAAAG  
CTAAAAAAGATGATGCCTAGGAGGACCGATGCTATATAAGGTTTTGCTATTCATTGAAAGCAGTAGTG  
ACTGATTTGTATATA

>MinSyn\_1612|Strength:0.000787791

GCGTGTTCGTTTTAGTGAGGAAAAATGTCAAAGATAATGTAGGCTATCAGCTTAGCGTGGGAGCCACCA  
ACTATGCCCAATTAGGTTGTCTGCACCTCAAATTTGCGGAAACCTCCTCGCCACTATGCCCAATTAGG  
TTGTCTGCACAGCCACTTGTGTTGCTGATCTTGCCTGCAGCAAGTGGATTAGTTGTCTGCACCTCTT  
ATGACCCCGCCGATGACGCGGGAGCTGATCTTGCCTGCCTTGATGATTCACTATCAGCGCTAGGAGG  
ACCGATGCTGATCTTGAACCATTATTGCGAAAACCTGGTACTTGTGTACAGGGCTCACTTTTCAACAAG  
GCTCACTGCTAGGAGGACTATATAAGGTTTTGCTATTCATTGAAAGCAGTAGTGACTGATTTGTATAT  
A

>MinSyn\_1321|Strength:0.000789045

GCGTGTTCGTTTTAGTGAGGGGAAAAAGAAGAGGTCCAATTAGGTTGTCTGCACCTAAAAATGTCAAAG  
ATATCAATCGAAAGGACAGTAAAGACCTCTACAAACAGTGGTCCCTCCACACTGCTAGGAGGACCGAT  
GCTGATGCTTTGTCAAAGCTAAAAAAGATGATGCTCTACAAAACCTGGTACTTGTGTGGTGGAGCAGC  
ACAACCGATGCTGATCCAGCCACTTGTGTCCCAATTAGGTTGTCTGCACCTCACATGTTGAAGCATCT  
TCCGACCTCTACAAAACCTATATAAGGTTTTGCTATTCATTGAAAGCAGTAGTGACTGATTTGTATATA

>MinSyn\_1972|Strength:0.000793954

GCGTGTTCGTTTTAGTGAGGGCTTTGTCAAAGCTAAAAAAGATGATGCGCAAGACCTCAACCACGTCT  
ACAACGACCACTATGCCCAATTAGGTTGTCTGCAACCATTATTGCGCGACCACTATGCCCAATTAGGT  
TGTCTAGGTGGCTCCTACTCTATATAAGGTTTTGCTATTCATTGAAAGCAGTAGTGACTGATTTGTAT  
ATA

>MinSyn\_1283|Strength:0.000794459

GCGTGTTCGTTTTAGTGAGGAAAAATGTCAAAGATACACTAGCTTTGTCAAAGCTAAAAAAGATGATG  
CTCACATGTAGGCTATCAGCTTAGCAATTATGACCCCGCCGATGACGCGGGAATTAGGTTGTCTGCT  
ATATAAGGTTTTGCTATTCATTGAAAGCAGTAGTGACTGATTTGTATATA

>MinSyn\_1941|Strength:0.000794495

GCGTGTTCGTTTTAGTGAGGGTGGGAGCCACCAAAACCTGGTACTTGTGTACAATTTGCGGAAACCTCCT  
CGTGCTAGGAGGACCGATGCTGATCTTGCCTCTATATAAGGTTTTGCTATTCATTGAAAGCAGTAGTG  
ACTGATTTGTATATA

>MinSyn\_1153|Strength:0.000794944

GCGTGTTCGTTTTAGTGAGGTGAAGATAAGATAATAATGTTGAAGATAAGACGGTAGGTACGACCACT  
ATGCCATTGCGATAAAGGAAAGGATGCTGATCTTGCCTGCCTAGCAAGTGGATTGTCTGCACCTCTAT  
ATAAGGTTTTGCTATTCATTGAAAGCAGTAGTGACTGATTTGTATATA

>MinSyn\_1210|Strength:0.000795732

GCGTGTTCGTTTTAGTGAGGATCGAAAGGACAGTACAAAACCTGGTACTTGTGTACAGCAGCCACTTGTG  
TCGACCACTATGCCTTTTCAACAAGGTACTTGTGTACAGGGCTCACTGCTAGGACTATATAAGGTTTT

GCTATTCATTGAAAGCAGTAGTGACTGATTTGTATATA  
>MinSyn\_1775|Strength:0.000796736  
GCGTGTTCGTTTTAGTGAGGTCCATCAACAAATAATCCAAGTAAGACCTCACATGTAGGCTATCAGCTT  
AGGCACACCAGCATGTGTTGATCACCAGCTACAGGGCTCACTGCTAGGAGGACAAGATTGATGAAAAG  
TCAAAAACAAAATCAATTATGGCTCACTGCTAGGAGGATGAAGATAAGATAATAATGTTGAAGATAA  
GACAGCTTAGCAAGACCTCTACAAAAGCTGTTGCTTTGTCAAAGCTAAAAAGATGATGCTACTTGTG  
TACAGGGCTCACTGCTATATAAGGTTTTGCTATTCATTGAAAGCAGTAGTGACTGATTTGTATATA  
>MinSyn\_1269|Strength:0.000802935  
GCGTGTTCGTTTTAGTGAGGGCACACCAGCATGTGTTGATCACCAGCTTACAGGGCAACCACGTCTACA  
AAGGGCTCACTGCTGGTGGAGCACGACAATGCCAATTAGCAAGTGGATAGGGCTCACTGCGGAAAAA  
GAAGAGGTTACTTGTGTACAGGGCTCACTGCTAGGAGGCTATATAAGGTTTTGCTATTCATTGAAAGC  
AGTAGTGACTGATTTGTATATA  
>MinSyn\_1862|Strength:0.000804795  
GCGTGTTCGTTTTAGTGAGGGCTTTGTCAAAGCTAAAAAGATGATGCGAATCCTTACCGCTATGGGT  
AAGATTGGTAGGTCACGACCACTATGCTATATAAGGTTTTGCTATTCATTGAAAGCAGTAGTGACTGA  
TTTGTATATA  
>MinSyn\_1552|Strength:0.000809195  
GCGTGTTCGTTTTAGTGAGGTGAAGATAAGATAATAATGTTGAAGATAAGAGTACAGGGCTCACTGCTA  
GGATGAGCTAAGCACATACGTCAGATCAGCTTAGCAAGACCTCTACAAAAGCTCAGAAGATCAAAGGG  
CTACATGTAGGCTATCAGCTTAGCAAGACCAGGTGGCTCCTACCTACAAGCACACCAGCATGTGTTGA  
TCACCAGCTGGAGGACCGATGCTGCAGCCACTTGTGTTAGGAGGACCGATGCTGATGTGGGAGCCACC  
ATATGCCCAATTAGGTTGTCTTGAAGCATCTTCCACTTGTGTACAGGGCTCACTGCTAGGAGAGCAAG  
TGGATCTGCACCTCACATCTATATAAGGTTTTGCTATTCATTGAAAGCAGTAGTGACTGATTTGTATA  
TA  
>MinSyn\_1872|Strength:0.000812737  
GCGTGTTCGTTTTAGTGAGGAAGATTGATGAAAAGTCAAAAACAAAATCAATTATCAGCTTAGCAAGA  
CCTCTACAAAATCACTATCAGCATGCCAATTAGGTTGTCTGCAGGAAAAAGAAGAGGTGGTAGGTCA  
CGACCACTATGCCAATTAGCTATATAAGGTTTTGCTATTCATTGAAAGCAGTAGTGACTGATTTGTA  
TATA  
>MinSyn\_1721|Strength:0.000822457  
GCGTGTTCGTTTTAGTGAGGTTATGACCCCCGCCGATGACGCGGGATCGCGGTAGGGCTTTGTCAAAG  
CTAAAAAGATGATGCGCAAGACCTCTAATTTCCGGAAACCTCCTCGCAAGACCTCCTATATAAGGTT  
TTGCTATTCATTGAAAGCAGTAGTGACTGATTTGTATATA  
>MinSyn\_1809|Strength:0.000823514  
GCGTGTTCGTTTTAGTGAGGAACCATTATTGCGAAGACCTCTACTCACTATCAGCCCCGATGCTGATCTT  
GCCTGCCTTGATGAGGTGGCTCCTACACAGGGCTCACTGCTAGGAGTTATGACCCCCGCCGATGACGC  
GGGAGCACCTCACGCTTTGTCAAAGCTAAAAAGATGATGCACTATATAAGGTTTTGCTATTCATTG  
AAAGCAGTAGTGACTGATTTGTATATA  
>MinSyn\_1722|Strength:0.000823839  
GCGTGTTCGTTTTAGTGAGGCTGACGTAAGGGATGACGCACATTGTCTGCACCTCACATGTAGGCCAGT  
GGTCCCTCCACGCTATCAGCTTAGCAAGACCTCTATCAGAAGATCAAAGGGCTATGCCAATTAGGTT  
GTCTGCACCTCACAGCAAGTGGATCGGTAGGTCACGACCACTATGCCAATTAGTGGGAGCCACCATA  
TGCCCAATTAGGTTGTCTGCACCTCACATCTCTCTGCCGACAGTGGTCCCAAAAAGCTGGTACTTGTGT  
AGGTGGCTCCTACAGGACCGATGCTGATCTTGCCTGCCTTGATAAAAATGTCAAAGATAGCTAGGAGG  
ACCGCTATATAAGGTTTTGCTATTCATTGAAAGCAGTAGTGACTGATTTGTATATA  
>MinSyn\_1319|Strength:0.000823855  
GCGTGTTCGTTTTAGTGAGGTGAAGCATCTTCTCGCGGTAGGTCACGACCCAGTGGTCCCTCCACATA  
AAAATGTCAAAGATATGATCTGGAAGAAAGAGGTTCAAATATTTCTTGTAGCAAGACCTCTACAAA  
ACTAGCAAGTGGATCTGCTAGGAGGACCGATGCTGATCTTGCCTATATAAGGTTTTGCTATTCATTG  
AAAGCAGTAGTGACTGATTTGTATATA  
>MinSyn\_1117|Strength:0.000827223  
GCGTGTTCGTTTTAGTGAGGCAGCCACTTGTGTGATGCTGATCTTTGAAGCATCTTCCATCTTGCCTGC  
CTTTATGACCCCCGCCGATGACGCGGGAATAGGTGGCTCCTACCTCACTGCTAGGAGGACCGATGCTG  
AGCTTTGTCAAAGCTAAAAAGATGATGCCAGGAACCACGTCTACAATAGGAGGACCGATGCTGATC

ATTGCGATAAAGGAAAGGCGCGGTAGGTCACGACCACTATGCTATATAAGGTTTTGCTATTCATTGAA  
AGCAGTAGTGACTGATTTGTATATA

>MinSyn\_1787|Strength:0.000828614

GCGTGTTCGTTTTAGTGAGGGTGGGAGCCACCACTATCAGCTTAGCGCACACCAGCATGTGTTGATCAC  
CAGCTTCAGCCACTTGTGTATGCTGAGCTTTGTCAAAGCTAAAAAGATGATGCAAGACCTCTACAT  
TGCGATAAAGGAAAGGGGCTCACTGCTAGGAGGACCGATGCCTATATAAGGTTTTGCTATTCATTGAA  
AGCAGTAGTGACTGATTTGTATATA

>MinSyn\_1558|Strength:0.000831852

GCGTGTTCGTTTTAGTGAGGTCTCTCTGCCGACAGTGGTCCCAAACCTCTACAAAACCTGGTACTTGTG  
TACAGGGCTTTGTCAAAGCTAAAAAGATGATGCACCACTATGCCTGGTGGAGCACGACACCTCTAC  
AAAACCTGGTACTTGAAGCATCTTCCAAACCTGGTACTTGTGTACTCACTATCAGCACTTGCAAATATTT  
CTTGTCTTGTGTACAGGGCTCACTGCTAGCTATATAAGGTTTTGCTATTCATTGAAAGCAGTAGTGAC  
TGATTTGTATATA

>MinSyn\_1170|Strength:0.000833212

GCGTGTTCGTTTTAGTGAGGCAAATATTTCTTGTAGACCTCTACAAAACCTGGTACTTGTGCAGCCACTT  
GTGTAGGACCGATGCTGATCTTGCCTGCCTTTTATGACCCCGCCGATGACGCGGGAAGCAAGACCTC  
TACAAAACCTGGTACTTGTGCTATATAAGGTTTTGCTATTCATTGAAAGCAGTAGTGACTGATTTGTAT  
ATA

>MinSyn\_1002|Strength:0.000835882

GCGTGTTCGTTTTAGTGAGGTCACTATCAGCCACATGTAGGCTATCAGCTTAGCATGAAGCATCTTCCA  
CCTCTACAAAACCTGGTACTTGTGCAAATATTTCTTGTACGACCACTATGCCCAATTAGCTATATAAG  
GTTTTGCTATTCATTGAAAGCAGTAGTGACTGATTTGTATATA

>MinSyn\_1105|Strength:0.000836902

GCGTGTTCGTTTTAGTGAGGATTGCGATAAAGGAAAGGTGCTAGGAGGACCGTTATGACCCCGCCGAT  
GACGCGGGAGGTACGACCACTATGCCCAAAGCAAGTGGATGTACTTGTGTACAGGGCTCACCTATAT  
AAGGTTTTGCTATTCATTGAAAGCAGTAGTGACTGATTTGTATATA

>MinSyn\_1626|Strength:0.000844379

GCGTGTTCGTTTTAGTGAGGAACACGTCTACAATGATCTTGCCTGCCTTGATGATTGGTGGAGCACGA  
CAGCAAGACCTCTACAAAACCTGGTACTTTGAAGATAAGATAAATAATGTTGAAGATAAGAGCGGTAGGT  
CAATTGCGATAAAGGAAAGGATGCCCAATTAGGTTGTCTGCACCTCACATTTTTCAACAATATCAGCT  
TAGCAAGACCTCTACAAAACCTATATAAGGTTTTGCTATTCATTGAAAGCAGTAGTGACTGATTTGTA  
TATA

>MinSyn\_1868|Strength:0.000845771

GCGTGTTCGTTTTAGTGAGGTCCATCAACAAATAATCCAAGTAAGGACCACTATGTCAGAAGATCAAAG  
GGCTACACCTCACATGTTCACTATCAGCCACCTCACATGTAGGCTATCAGCTGAAGATAAGATAATAA  
TGTTGAAGATAAGACACCTCACATGTAGGCTATCAGCTTAGCAACAGTGGTCCCTCCACAGACCTCTA  
CAAACCTGGATCGAAAGGACAGTACTATGCCCAATTAGGTTGTCTGCACCTCAGGTGGCTCCTACCTT  
GTGTACAGGGCTCACTAGCAAGTGGATGACCGACTATATAAGGTTTTGCTATTCATTGAAAGCAGTAG  
TGACTGATTTGTATATA

>MinSyn\_1423|Strength:0.00084728

GCGTGTTCGTTTTAGTGAGGATTGCGATAAAGGAAAGGCCTGCCTTGATGATACAGCCACTTGTGTGTA  
GGTACGACCACTATGAAAAATGTCAAAGATACACTGCTAGGAGGACGCTTTGTCAAAGCTAAAAAA  
GATGATGCAGGAGGACCGATGCTGATCTTGCCTGCAATTTGGGAAACCTCCTCGCAAGACCTCTACA  
AAACTGGTACTGTGGGAGCCACCAAGACCTCTACAAAACCTGGTCCATCAACAAATAATCCAAGTAAG  
AGGCTATCAGCTTAGCAAGACTATATAAGGTTTTGCTATTCATTGAAAGCAGTAGTGACTGATTTGTA  
TATA

>MinSyn\_1537|Strength:0.000848611

GCGTGTTCGTTTTAGTGAGGGCTTTGTCAAAGCTAAAAAGATGATGCTACAAAACCTGGTACTTTCTC  
TCTGCCGACAGTGGTCCCAAACCTACTATATAAGGTTTTGCTATTCATTGAAAGCAGTAGTGACTGATT  
TGATATA

>MinSyn\_1237|Strength:0.000849568

GCGTGTTCGTTTTAGTGAGGATTGCGATAAAGGAAAGGTAGGTTGTCTGCAAAAAATGTCAAAGATACT  
GAAGCATCTTCCGGCTATCAGCTTAGCAAGACCTCTACAAAACCTATTATTGCGTACTTGTGTACAGGG  
CTCACCTATATAAGGTTTTGCTATTCATTGAAAGCAGTAGTGACTGATTTGTATATA



>MinSyn\_1281|Strength:0.000849732  
GCGTGTGTTTTAGTGAGGGGAAAAGAAGAGTTACAGGGCTCACTGCTAGGAGGTCTCTCTGCCGA  
CAGTGGTCCCAAAGTACTTGTGTACAGGGCTCACTGCTAGGAATTTTCGGGAAACCTCCTCGCAGCTTA  
GCAAGACCTCTAGCACACCAGCATGTGTTGATCACCAGCTAACTGGTACTTGTGTACAGGGCTCACTG  
AAGCATCTTCCAAGTACTTGTGTACAGGGCTCACTGCTAACCATTTGCGGACCACTATGCCCA  
ATTAGTTGTCTGCCTATATAAGTTTTGCTATTCATTGAAAGCAGTAGTGACTGATTTGTATATA  
>MinSyn\_1465|Strength:0.000851947  
GCGTGTGTTTTAGTGAGGTGGTGGAGCACGACATAGCAAGTTTTCAACAATGCCCAATTAGTTGTCT  
TGCACCTCACATGTCCATCAACAAATAATCCAAGTAAGTATGCCCAATTAGTTGTCTGCACCTCAGA  
AGATCAAAGGGCTAACAGGGCTCACTGCTAGGAGGACCGATGCTATATAAGTTTTGCTATTCATTGA  
AAGCAGTAGTGACTGATTTGTATATA  
>MinSyn\_1415|Strength:0.000854452  
GCGTGTGTTTTAGTGAGGAACACGTCTACAAACGACCACTATGCCCAATTAGTTGAAGATTGATG  
AAAAGTCAAAAACAAAAATCAATTATACTTGTGTACTCACTATCAGCCCGATGCTGATCTTGCCTAGC  
AAGTGGATGGTACGACCACTATATAAGTTTTGCTATTCATTGAAAGCAGTAGTGACTGATTTGTAT  
ATA  
>MinSyn\_1538|Strength:0.000854746  
GCGTGTGTTTTAGTGAGGAACACGTCTACAACGCGGTAGGTCACGACTGGTGGAGCACGACAGGCT  
TTGTCAAAGCTAAAAAGATGATGCGCCCAATTTGAAGCATCTTCCCCTCTACAAAAGTGGTACTTG  
TGTACAAAATGTCAAAGATAGATGCTGATCTTGCCTGCCTTGATGATCGAAAGGACAGTAAGGAGGA  
CCGATGCCTATATAAGTTTTGCTATTCATTGAAAGCAGTAGTGACTGATTTGTATATA  
>MinSyn\_1507|Strength:0.000855512  
GCGTGTGTTTTAGTGAGGAACATTATTGCGTACAAAAGTGGTACTTGTGTACAGGGCTCATCACTA  
TCAGCCTGCACCTCACATGTAGGCTATCAGCTTATGGTGGAGCACGACACACTGCTATATAAGTTTT  
GCTATTCATTGAAAGCAGTAGTGACTGATTTGTATATA  
>MinSyn\_1888|Strength:0.000856484  
GCGTGTGTTTTAGTGAGGCAGTGGTCCCTCCACTCTTGCCTGCGCACACCAGCATGTGTTGATCACC  
AGCTTCACATGTCAAATATTTCTTGTCAAAAATGTCAAAGATAACAAAAGTGGGCTTTGTCAAAG  
CTAAAAAGATGATGCCGACCACTATGCCCAATTACTATATAAGTTTTGCTATTCATTGAAAGCAGT  
AGTGACTGATTTGTATATA  
>MinSyn\_1884|Strength:0.000859706  
GCGTGTGTTTTAGTGAGGATCCTTACCGCTATGGGTAAGATTAGCTTTGTCAAAGCTAAAAAGAT  
GATGCGCTCACTGCTCCATCAACAAATAATCCAAGTAAGGCTATCAGCTTAGCAAGACCTCTACA  
ATATAAGTTTTGCTATTCATTGAAAGCAGTAGTGACTGATTTGTATATA  
>MinSyn\_1192|Strength:0.000859789  
GCGTGTGTTTTAGTGAGGCAAATATTTCTTGTCCCAATTAGGTATCCTTACCGCTATGGGTAAGATT  
GAGGACCGATGCTGATCTTGCCTAATTTTCGGGAAACCTCCTCGGCCCAATTAAGGTGGCTCCTACGTG  
TACAGGGCTCACTGCTAGGCAGCCACTTGTGTACATGTAGGCTATCAGCTTAGCAAGACAAAAATGTC  
AAAGATATTGTCTGCACCTCACATGTAGGCTATCAGCTATATAAGTTTTGCTATTCATTGAAAGCAG  
TAGTGACTGATTTGTATATA  
>MinSyn\_1252|Strength:0.000867721  
GCGTGTGTTTTAGTGAGGCACACCAGCATGTGTTGATCACCAGCTGGACCGATGCTGATCTTGCCT  
GCCTTGATAACCATTATTGCGGGCTCATCAGAAGATCAAAGGGCTAGTACTTGTGTACAGGCTTTGTC  
AAAAGCTAAAAAGATGATGCGCTCACAAAATGTCAAAGATAAGGGCCTATATAAGTTTTGCTATT  
CATTGAAAGCAGTAGTGACTGATTTGTATATA  
>MinSyn\_1497|Strength:0.000868984  
GCGTGTGTTTTAGTGAGTTTTCAACAATCGCCAGCCACTTGTGTAAACTGGTACTTGTGTACAGGG  
CTCACTTCCATCAACAAATAATCCAAGTAAGTACAGGGCTCACTGCTAGGAGGACCGATGCCTATATA  
AGTTTTGCTATTCATTGAAAGCAGTAGTGACTGATTTGTATATA  
>MinSyn\_1064|Strength:0.000871774  
GCGTGTGTTTTAGTGAGGTCACTATCAGCGCTCACTGCTAGGAGGACCGATGCTGATTTTTCAACAA  
TCTGCTATATAAGTTTTGCTATTCATTGAAAGCAGTAGTGACTGATTTGTATATA  
>MinSyn\_1804|Strength:0.000873004  
GCGTGTGTTTTAGTGAGTTATGACCCCGCCGATGACGCGGGAGACCTCTACAAAAGTGGTACTTG

TGCAGCCACTTGTGTCGCGGTAGGTCACGACCACTATGCCCAATCACTATCAGCCACGACCACTATGCCAATTAGGTTGTCTGGCACACCAGCATGTGTTGATCACCAGCTTACAGGGCTCACTGCTAGGAGGACCCTATATAAGGTTTTGCTATTCATTGAAAGCAGTAGTGACTGATTTGTATATA

>MinSyn\_1820|Strength:0.000877083

GCGTGTGCTTTTTAGTGAGGTGAAGATAAGATAATAATGTTGAAGATAAGAGGACCGATGCTGATCTTAATTTTCGGGAAACCTCCTCGCTCACATGTAGGCTATCAGCTTAGCAGCACACCAGCATGTGTTGATCACAGCTCATGTAGGCTATCAGCTTAGCAAGACCAACCATTATTGCGTGCTGATCTTGCTGCCTTGATGAAGCAAGTGGATACAAAACCTGGTACTTGTGTACAGGGCTCTGGTGGAGCACGACAACCTCACATGTAGGCTTTATGACCCCGCCGATGACGCGGGAATGCTGATCTTGCTGCCTTGATGACTATATAAGGTTTTGCTATTCATTGAAAGCAGTAGTGACTGATTTGTATATA

>MinSyn\_1710|Strength:0.000882035

GCGTGTGCTTTTTAGTGAGGGGAAAAGAAGAGGTTCTACAAAACCTGGTACTTGTGTGGTGGAGCACGACATCTGCACCTCACATGTAGGCTATTATGACCCCGCCGATGACGCGGGATAGAGCAAGTGGATAGGTGTCTGCACCTCACATGTAGGCTAGGTGGCTCCTACTGCCTGCCAACCACGTCTACAACCTACAAAACCTGGTACTTGTGTACAGGCTATATAAGGTTTTGCTATTCATTGAAAGCAGTAGTGACTGATTTGTATATA

>MinSyn\_1212|Strength:0.000887428

GCGTGTGCTTTTTAGTGAGGATCCTTACCGCTATGGGTAAGATTGACCTCTACAAAACCTGGCTTTGTCAAAGCTAAAAAAGATGATGCACATGTAGGAACCATTATTGCGGGCTCACTGCTCAGAAGATCAAAGGGCTAACCTCACATGTAGGCTATCAGCTTCTATATAAGGTTTTGCTATTCATTGAAAGCAGTAGTGACTGATTTGTATATA

>MinSyn\_1997|Strength:0.000889804

GCGTGTGCTTTTTAGTGAGGTCACTATCAGCGATGCTGATCTTGCTGCCTTGATGATTGCGATAAAGGAAAGGTAGGCTATCAGCTTAGCAAGACCTCTACAAAAAATGTCAAAGATACCAATTAGGTTGTCAACCATTATTGCGATGCTGATCTTGCTGCCTTGACTATATAAGGTTTTGCTATTCATTGAAAGCAGTAGTGACTGATTTGTATATA

>MinSyn\_1083|Strength:0.000890152

GCGTGTGCTTTTTAGTGAGGGTGGGAGCCACCATCACATGTAGGCTATCAGCTTAGCAAGATTTTCAACAAATGCTGATCTCTATATAAGGTTTTGCTATTCATTGAAAGCAGTAGTGACTGATTTGTATATA

>MinSyn\_1920|Strength:0.000890409

GCGTGTGCTTTTTAGTGAGGCAAATATTTCTTGTTAGGTCACGACCACTAGGAAAAAGAAGAGGTCGTGGAGCCACCAAGGACCGATGCTGATCTTGCTGCCATTGCGATAAAGGAAAGGTTAGGTTGTCTGCACCTCACATGCTATATAAGGTTTTGCTATTCATTGAAAGCAGTAGTGACTGATTTGTATATA

>MinSyn\_1378|Strength:0.000891386

GCGTGTGCTTTTTAGTGAGGTTTTCAACAATGTACAGGGCTCACTGCTAGGAGGAGGTGGCTCCTACGAGGACCGATGCTGATCTCACTATCAGCAGCAAGACCTCTACACAGCCACTTGTTGTAATTAGGTTGTCTATATAAGGTTTTGCTATTCATTGAAAGCAGTAGTGACTGATTTGTATATA

>MinSyn\_1194|Strength:0.000891485

GCGTGTGCTTTTTAGTGAGGGGAAAAGAAGAGGTCGAAACCATTATTGCGGACCGATGCTGATCTTGCTGCCTCAGAAGATCAAAGGGCTACCTCTACAAAACCTGGTACTTCTATATAAGGTTTTGCTATTCATTGAAAGCAGTAGTGACTGATTTGTATATA

>MinSyn\_1326|Strength:0.000891738

GCGTGTGCTTTTTAGTGAGGCAGTGGTCCCTCCACCTATGCCCAATTAGGTTGGCTTTGTCAAAGCTAAAAAGATGATGCTACTTGTGTACAGGGCTCAGCACACCAGCATGTGTTGATCACCAGCTCACCTCACATGTGAAGCATCTTCCGTACAGGGCTCACTGCTAGGAAACCATTATTGCGTGTACAGGGCTCACTGCTACTATATAAGGTTTTGCTATTCATTGAAAGCAGTAGTGACTGATTTGTATATA

>MinSyn\_1632|Strength:0.000891779

GCGTGTGCTTTTTAGTGAGGGCACACCAGCATGTGTTGATCACCAGCTATAAACCACGTCTACAAACTAGCCCAATTAGGTTGTCTGCCAAATATTTCTTGCTCTACAAAACCTGGTACTTGTGTCTATATAAGGTTTTGCTATTCATTGAAAGCAGTAGTGACTGATTTGTATATA

>MinSyn\_1701|Strength:0.000891971

GCGTGTGCTTTTTAGTGAGGATCCTTACCGCTATGGGTAAGATTATTAGGTTGTCTGCACCTCACATGTAGCAGTGGTCCCTCCACCGGGTGCACACCAGCATGTGTTGATCACCAGCTGCGGTAGGTCACGACCACTATGCCAAGATTGATGAAAAGTCAAAAACAAAATCAATTATCTTAGCAAGACCTCTACAAAACCTGGTACTCAGAAGATCAAAGGGCTATTAGGCTTTGTCAAAGCTAAAAAAGATGATGCATCAGCTTAGCAA

CAGCCACTTGTGTAGGAGGACCGATGCTGATCTTGCCTAACCATTATTGCGCACGACCACTATGCCCA  
ATTAGTTCACTATCAGCGTCTGCACCTCACATGTAGGCTATATAAGGTTTTGCTATTCATTGAAAGC  
AGTAGTACTGATTTGTATATA

>MinSyn\_1990|Strength:0.000892088

GCGTGTTCGTTTTAGTGAGGCAGCCACTTGTGTGAGGACCGATGCTGATCTTGTCACTATCAGCGCTGA  
TCTTGCCTGCCTAGGTGGCTCCTACACAAAAGTGGTACTTGTGTTCTCTCTGCCGACAGTGGTCCCAA  
ACTGGTACTTGTGTACAGGGCTCACTGCTCTATATAAGGTTTTGCTATTCATTGAAAGCAGTAGTGAC  
TGATTTGTATATA

>MinSyn\_1026|Strength:0.000892658

GCGTGTTCGTTTTAGTGAGGAACCACGTCTACAAGTGTGAAGATAAGATAATAATGTTGAAGATAAGAA  
CTATGCCAGGTGGCTCCTACCAATTAGTTGTCTGCACCTCACATGTAGAAAAATGTCAAAGATAT  
GTACAGGGCTCACTGCTAGGAGGACCGCTATATAAGGTTTTGCTATTCATTGAAAGCAGTAGTGACTG  
ATTTGTATATA

>MinSyn\_1475|Strength:0.000893662

GCGTGTTCGTTTTAGTGAGGATCGAAAGGACAGTACAAGACCTCTACAAAAGTGGTTTTCAACAACAGC  
TTAGCAAGACCTCTACAAAAGTCTATATAAGGTTTTGCTATTCATTGAAAGCAGTAGTGACTGATTTG  
TATATA

>MinSyn\_1387|Strength:0.000896947

GCGTGTTCGTTTTAGTGAGGTTTTCAACAATGCTAGGAGGACCGATGCTGATCTTGAACCACTATTGCG  
GCCAATTAGGCTATATAAGGTTTTGCTATTCATTGAAAGCAGTAGTGACTGATTTGTATATA

>MinSyn\_1889|Strength:0.000899401

GCGTGTTCGTTTTAGTGAGGCAGTGGTCCCTCCACCTGCTAGGAGGCACACCAGCATGTGTTGATCACC  
AGCTCTCACATGTAGGCTATCAGCTTAGTTATGACCCCCGCCGATGACGCGGGATCACTGCTAGAGCA  
AGTGATGCACCTCACATGTAGGCTATCAGCTTACTATATAAGGTTTTGCTATTCATTGAAAGCAGTA  
GTGACTGATTTGTATATA

>MinSyn\_1887|Strength:0.00090247

GCGTGTTCGTTTTAGTGAGGCAGTGGTCCCTCCACCTATCAGCTTATCCATCAACAATAATCCAAGTA  
AGTGTAGGCTATCAGCTTAGCAAGACCTCTACGCTTTGTCAAAGCTAAAAAGATGATGCGTACAGG  
GCTCACTGCTAGGAGGAAGGTGGCTCCTACGGACCGATGCTGATCTTGCCTGTTATGACCCCCGCCGA  
TGACGCGGGATATCCTATATAAGGTTTTGCTATTCATTGAAAGCAGTAGTGACTGATTTGTATATA

>MinSyn\_1151|Strength:0.00090269

GCGTGTTCGTTTTAGTGAGGTTTTCAACAAGTGCACCTCACATTGAAGATAAGATAATAATGTTGAAGA  
TAAGAACATGTAGGCTATCAGCTTAGCAAGACCAATATTTCTTGTCTTGAAGCATCTTCCCTATGCC  
CAATTAGGTTGTAGGTGGCTCCTACGCGGTAGGTACGACCACTATGCCCAATTCTATATAAGGTTTT  
GCTATTCATTGAAAGCAGTAGTGACTGATTTGTATATA

>MinSyn\_1966|Strength:0.000903778

GCGTGTTCGTTTTAGTGAGGCAGTGGTCCCTCCACGCTCACTGCTAAGCAAGTGGATTACATGTAGGA  
ACCACGTCTACAAGGAGGACCCAGCCACTTGTGTCCAATTAGGTTGTCTGCACCTATATAAGGTTTT  
GCTATTCATTGAAAGCAGTAGTGACTGATTTGTATATA

>MinSyn\_1456|Strength:0.000904591

GCGTGTTCGTTTTAGTGAGGTTATGACCCCCGCCGATGACGCGGGAAGCAAGACCTCTACAAATCCATC  
AACAAATAATCCAAGTAAGCTATGCCCAATTAGGTTAACACGTCTACAATATCAGCTTAGCAAGACC  
TCTACAAAAGTCTATATAAGGTTTTGCTATTCATTGAAAGCAGTAGTGACTGATTTGTATATA

>MinSyn\_1933|Strength:0.000905563

GCGTGTTCGTTTTAGTGAGGATTGCGATAAAGGAAAGGCAGCTTAGCAAGACCTCTCTCTGCCGACAGT  
GGTCCCAAAACATGTAGGCTATCAGCTTAGCAAGACCTAGGTGGCTCCTACGTCTGCACCTCACATGT  
TTATGACCCCCGCCGATGACGCGGGATGTGTACAGGGCTCACTGCTAGGAGGAGCAAGTGGATGTCTA  
TATAAGGTTTTGCTATTCATTGAAAGCAGTAGTGACTGATTTGTATATA

>MinSyn\_1930|Strength:0.000908403

GCGTGTTCGTTTTAGTGAGGTGAAGCATCTTCCCTTGTGTACAGGAACCATTATTGCGAGGTTGTCTGC  
ACCTCACATGTAGGCTTGGTGGAGCACGACCCGATGCATCGAAAGGACAGTAATCAAAAAATGTCAA  
AGATATCACATGTAGGCTATCAGCTTAGCAAGAGGTGGCTCCTACCTAGGAGGACCGATGCTGATCTC  
TATATAAGGTTTTGCTATTCATTGAAAGCAGTAGTGACTGATTTGTATATA

>MinSyn\_1304|Strength:0.000909298

GCGTGTTCGTTTTAGTGAGGGCACACCAGCATGTGTTGATCACCAGCTCATGTAGGCTATCAGCTTAGC  
AAGACCTGAAGCATCTTCCCACCTCACATGTAGGCTATCAGCTTAGTTTTCAACAAGCCTTGACTATA  
TAAGGTTTTGCTATTCATTGAAAGCAGTAGTGACTGATTTGTATATA

>MinSyn\_1931|Strength:0.000911489

GCGTGTTCGTTTTAGTGAGGTCCATCAACAAATAATCCAAGTAAGACGACCACTATGCCAATTTTCA  
AGATCAAAGGGCTAGCAAGAATCGAAAGGACAGTAGCTTAGCAAGACCTGAAGCATCTTCTGCTGAT  
CTTGCCAGGTGGCTCCTACTACAGGGCTCACTGCTAGGAGGAGCACACCAGCATGTGTTGATCACCAG  
CTCCCAATTAGGTTGTCTGCACCTCACAAAGCAAGTGGATAGGAAAAAGAAGAGGTCTATGCCAATTA  
GGTTGTCTGCACCTCACTATATAAGGTTTTGCTATTCATTGAAAGCAGTAGTGACTGATTTGTATATA

>MinSyn\_1557|Strength:0.000914765

GCGTGTTCGTTTTAGTGAGGAGCAAGTGGATAGGTCACGAGCACACCAGCATGTGTTGATCACCAGCTG  
CTTAGCAAGACCTCTACAAAAGTGGTACTCTATATAAGGTTTTGCTATTCATTGAAAGCAGTAGTGAC  
TGATTTGTATATA

>MinSyn\_1532|Strength:0.000919201

GCGTGTTCGTTTTAGTGAGGTCCATCAACAAATAATCCAAGTAAGGACCACTATGCCAATTAGGTTGT  
CACTATCAGCTGATCTTGCCTGCCTTGATGATACAGCCACTTGTGTTTGTCTGCACCTCCTATATAAG  
GTTTTGCTATTCATTGAAAGCAGTAGTGACTGATTTGTATATA

>MinSyn\_1648|Strength:0.000920046

GCGTGTTCGTTTTAGTGAGGTGAGAAGATCAAAGGGCTACCGATGCTGATCTTGCCTGCCTGGGAAAA  
AGAAGAGGTTGCTGATCTTGCCTGCCTGCACACCAGCATGTGTTGATCACCAGCTACCACTATGCC  
AATTAGGTTGGTGGGAGCCACCACTCACTGCTAGGAGGACCGATGCTGATCTTTTTTCAACAAGTAGG  
TCACGACCTATATAAGGTTTTGCTATTCATTGAAAGCAGTAGTGACTGATTTGTATATA

>MinSyn\_1712|Strength:0.000921395

GCGTGTTCGTTTTAGTGAGGGGAAAAAGAAGAGGTCGGTAGGTCACGAAGGTGGCTCCTACTGTCTGCA  
CCTCACATGTAGGCTATCAGCACACCAGCATGTGTTGATCACCAGCTACTATGCCAATTAGGTTGTC  
TGCACCTCGCTTTGTCAAAGCTAAAAAGATGATGCGAGGACCGATGCTGATCTTGCCTCAGAAGAT  
CAAAGGGCTAACCTCACATGTCTCTCTGCGGACAGTGGTCCAAACTATGCCAATTAGGTTGGTGGG  
AGCCACCACCAATTAGGTTGTCTGCACTGAAGCATCTCCGTACAGGGCTCACTGCTCTATATAAGG  
TTTTGCTATTCATTGAAAGCAGTAGTGACTGATTTGTATATA

>MinSyn\_1734|Strength:0.000923066

GCGTGTTCGTTTTAGTGAGGATCGAAAGGACAGTACTTGAAGATAAGATAATAATGTTGAAGATAAGAT  
CTACAAAAGTGGTACTTGTGTAGCAAGTGGATTGCTGATCAGTGGTCCCTCCACGTACAGGGCTCACT  
GGGAAAAAGAAGAGGTAGGGCTCACAAAGATTGATGAAAAGTCAAAAACAAAAATCAATTATGCTGATC  
TTGCTGCTTTGTCAAAGCTAAAAAGATGATGCGGACCGATGCTGATCTTGTCACTATCAGCTCTA  
CAACTATATAAGGTTTTGCTATTCATTGAAAGCAGTAGTGACTGATTTGTATATA

>MinSyn\_1921|Strength:0.000924322

GCGTGTTCGTTTTAGTGAGGGTGGGAGCCACCAACTATGCCAATTAGGTTGTCTGCTGGTGGAGCAG  
ACAACCTCTACAAAACCAATATTTCTTGTACCTCTACAAAAGTGGTACTTGTGTACTATATAAGGTT  
TTGCTATTCATTGAAAGCAGTAGTGACTGATTTGTATATA

>MinSyn\_1162|Strength:0.000926081

GCGTGTTCGTTTTAGTGAGGTGGTGGAGCACGACAGCTTAGCGTGGGAGCCACCATAGCAAGACCTCT  
ACAAAAGTGGTACTTTCACTATCAGCGCCTGCCTTGATCTATATAAGGTTTTGCTATTCATTGAAAGC  
AGTAGTGACTGATTTGTATATA

>MinSyn\_1219|Strength:0.000926277

GCGTGTTCGTTTTAGTGAGGTTTTCAACAATACTTGTGTACCAGTGGTCCCTCCACACAGGGCTCACTG  
CTAGGAGGACCGATGCTCTATATAAGGTTTTGCTATTCATTGAAAGCAGTAGTGACTGATTTGTATAT  
A

>MinSyn\_1405|Strength:0.000934001

GCGTGTTCGTTTTAGTGAGGATTGCGATAAAGGAAAGGACAGGGCTCACTGCTAGGAGGACCGATGCTC  
AAATATTTCTTGTGTAGGTCACGACCACTATGCCAATTACAGTGGTCCCTCCACCGCGGTAGCTATA  
TAAGGTTTTGCTATTCATTGAAAGCAGTAGTGACTGATTTGTATATA

>MinSyn\_1159|Strength:0.000934146

GCGTGTTCGTTTTAGTGAGGGGAAAAAGAAGAGGTAGGGCTCACTGCTAGGAGGACCGATGCTTCACTA  
TCAGCAGACCTCTAGCTTTGTCAAAGCTAAAAAGATGATGCTACAGGGCTCACTGCTAGGAGGAAG

CAAGTGGATCTCACTGCTAGGAGGACCGATGCTAAGATTGATGAAAAGTCAAAAACAAAATCAATTA  
TACGAACCATTATTGCGTGCCCAATTAGGTTCTATATAAGGTTTTGCTATTCATTGAAAGCAGTAGTG  
ACTGATTTGTATATA

>MinSyn\_1898|Strength:0.00094

GCGTGTTCGTTTTAGTGAGGAGGTGGCTCTACCGACCACTATGCCCAATTAGGTTGTCTGCAAACCAT  
TATTGCGTTGTCTGCACCTCCTATATAAGGTTTTGCTATTCATTGAAAGCAGTAGTGACTGATTTGTA  
TATA

>MinSyn\_1485|Strength:0.00094031

GCGTGTTCGTTTTAGTGAGGATCCTTACCGCTATGGGTAAGATTTACATGTAGGCTATCAGCTTAGCA  
AAACCATTATTGCGTGTACATCACTATCAGCGGCTATCAGCTTAGCAAGACCTCCTATATAAGGTTTT  
GCTATTCATTGAAAGCAGTAGTGACTGATTTGTATATA

>MinSyn\_1771|Strength:0.000942817

GCGTGTTCGTTTTAGTGAGGAACACGTCTACAACTGCTAGCAGCCACTTGTGTTTACGCTTAGTCAGA  
AGATCAAAGGGCTAGCTAGGAGGACCGATGCTACTATCAGCGCTAGGAGGACCGATGCTGATCTTGCA  
ATTTTCGGGAAACCTCCTCGGCTAGGAGGACCGATGCTGATCTTGCCCTCAGTGGTCCCTCCACACCGAT  
GCTGATCTTGCCCTGCCTTGATGATTGCGATAAAGGAAAGGTTGCCTGCCTTGATTTTCAACAAGTCAC  
GACCACTATGCCCTATATAAGGTTTTGCTATTCATTGAAAGCAGTAGTGACTGATTTGTATATA

>MinSyn\_1952|Strength:0.000943963

GCGTGTTCGTTTTAGTGAGGTGGTGGAGCACGACAGTACTTGTGTAACCATTATTGCGCAATTAGGGGA  
AAAAGAAGAGGTGGTAGGTTCCATCAACAAATAATCCAAGTAAGGCAAGACCTCTACGCTTTGTCAA  
AAGCTAAAAAAGATGATGCCTGCACCTCACAATTTTCGGGAAACCTCCTCGCAGCTTAGCAAGACCTCT  
ACAAAAGTGGTAAAAATGTCAAAGATAAACTGGTACTTGTGCTTACCCTATGGGTAAGATTGCAA  
GACCTCTACAAAAGTGGTACTTGTGCTATATAAGGTTTTGCTATTCATTGAAAGCAGTAGTGACTGAT  
TTGTATATA

>MinSyn\_1725|Strength:0.000944355

GCGTGTTCGTTTTAGTGAGGGGAAAAAGAAGAGGTCTCTAAATTTTCGGGAAACCTCCTCGTACAGGGC  
TCACTGCAACCACGTCTACAAACATGTAGGCTATCAGCTTAGCATCAGAAGATCAAAGGGCTAAGCAA  
GACCTCTACAAAAGTCTATATAAGGTTTTGCTATTCATTGAAAGCAGTAGTGACTGATTTGTATATA

>MinSyn\_1038|Strength:0.000944508

GCGTGTTCGTTTTAGTGAGGGCTTTGTCAAAGCTAAAAAGATGATGCCAATTAGGTTGTCTGCACCT  
CAGTGGTCCCTCCACCCAATTAGGTTGTGAAGATAAGATAATAATGTTGAAGATAAGATTGTCTGCAC  
CTCACATGTAGGCTACTATATAAGGTTTTGCTATTCATTGAAAGCAGTAGTGACTGATTTGTATATA

>MinSyn\_1634|Strength:0.000945909

GCGTGTTCGTTTTAGTGAGGAACCATTATTGCGTCTGAAGATAAGATAATAATGTTGAAGATAAGACAC  
TATGCCCAATTAGGTTGTCTGCTCTCTCTGCCGACAGTGGTCCCAAAAGACCTCTACAAAAGTGGTAC  
AATTTTCGGGAAACCTCCTCGCTATCAGCTTAGCAAGACCTCTACAAGTGGGAGCCACCACCTCACATG  
TAGGCTATCAGCTTCTATATAAGGTTTTGCTATTCATTGAAAGCAGTAGTGACTGATTTGTATATA

>MinSyn\_1717|Strength:0.000947593

GCGTGTTCGTTTTAGTGAGGATTGCGATAAAGGAAAGGTAGGTTGTCTGCACCTCACATGTAGGCTAAC  
CACGTCTACAAAGGTCACGAAGATTGATGAAAAGTCAAAAACAAAATCAATTATGTAGGCTATCAGC  
TTAGCAACAGCCACTTGTGTACCACTATGCCCAATTCACTATCAGCATCAGCTTAGCAAGACCTCTAC  
AAAAGTAAAAATGTCAAAGATATGCCCAATTAGGTTGTCTGCATTTTCAACAAACCACTATGCCCAAT  
TAGGTTGCTATATAAGGTTTTGCTATTCATTGAAAGCAGTAGTGACTGATTTGTATATA

>MinSyn\_1250|Strength:0.000948398

GCGTGTTCGTTTTAGTGAGGTGGTGGAGCACGACACAGGGCTCACTGCTAGGAGGACCGATGGGAAAAA  
GAAGAGGTGCCTGCCTTTTTCAACAATTGTCTGCACCTCTATATAAGGTTTTGCTATTCATTGAAAG  
CAGTAGTGACTGATTTGTATATA

>MinSyn\_1110|Strength:0.000952099

GCGTGTTCGTTTTAGTGAGGGCACACCAGCATGTGTTGATCACCAGCTTGATCAGAAGATCAAAGGGCT  
ATCTGCACCTACAATCGAAAGGACAGTAACAAAAGTGGTACTTGTGTACAGGGCTAAGATTGATGAA  
AAGTCAAAAACAAAATCAATTATTTTATGACCCCGCGGATGACGCGGGAGTACTATCCTTACCCT  
ATGGGTAAGATTAAGACCTCCAGCCACTTGTGTTTAGGTTGTCTGCACCTCACAACCACGTCTACAAT  
GTACAGGGCTCACTGCTAGGGCTTTGTCAAAGCTAAAAAGATGATGCCGGTAGGTCACGACCACTA  
TGCCCAACTATATAAGGTTTTGCTATTCATTGAAAGCAGTAGTGACTGATTTGTATATA

>MinSyn\_1054|Strength:0.000954328  
GCGTGTCTGTTTTAGTGAGGTGAAGCATCTTCCCAAACTGGTACTTGTGTACAGCCACTTGTGTCCACT  
ATGCCCAATTAGGTTGTCTGCACCTTATGACCCCCGCCGATGACGCGGGAAAACCTGATCCTTACCGCT  
ATGGGTAAGATTTTCGCGGTAGGTCACAGCAAGTGGATCTCACATGTAGGCTATCAGCTTATCGAAAGG  
ACAGTATGCCTCTATATAAGGTTTTGCTATTTCATTGAAAGCAGTAGTGACTGATTTGTATATA

>MinSyn\_1382|Strength:0.000954832  
GCGTGTCTGTTTTAGTGAGGTGGTGGAGCACGACAGTCACGACCACTATGCCCAATTAGGTAATTTTCGG  
GAAACCTCCTCGCTATAGGTGGCTCCTACGCTAGGAGGACCGATGCTGATCTTGCCTGCAGCCACTTG  
TGTAACCTGGTACTTGTGTACCTATATAAGGTTTTGCTATTTCATTGAAAGCAGTAGTGACTGATTTGTA  
TATA

>MinSyn\_1462|Strength:0.000955701  
GCGTGTCTGTTTTAGTGAGGAAAAATGTCAAAGATAGTCACGACCACTATGCCCAATTAGGTTCTCTCG  
CCGACAGTGGTCCCAAAGTCACGACCACTATGCCCACTATATAAGGTTTTGCTATTTCATTGAAAGCAG  
TAGTGACTGATTTGTATATA

>MinSyn\_1179|Strength:0.000958548  
GCGTGTCTGTTTTAGTGAGGTCACTATCAGCACTGCTAGGAGGACCGATGCCAGTGGTCCCTCCACGCT  
ATCAGCTTAGCAAGACCTCTACGTGGGAGCCACCACCAATTAGCTATATAAGGTTTTGCTATTTCATTG  
AAAGCAGTAGTGACTGATTTGTATATA

>MinSyn\_1727|Strength:0.000959517  
GCGTGTCTGTTTTAGTGAGGCAGCCACTTGTGTATGTAGGCTATCAGCTTAGCAAGACCTCGCACACCA  
GCATGTGTTGATCACCAGCTTATGCCCAATTAGGTTGTCTGCCTATATAAGGTTTTGCTATTTCATTGA  
AAGCAGTAGTGACTGATTTGTATATA

>MinSyn\_1607|Strength:0.000961321  
GCGTGTCTGTTTTAGTGAGGAGGTGGCTCCTACAACTGGTACTTGTGTACAGGGCAAATATTTTCTTGT  
TTAGGTTTCAAGATCAAAGGGCTAGCTATCAGCTTAGAATTTTCGGGAAACCTCCTCGTGCCTGCCTT  
GATGCAGTGGTCCCTCCACGCAAGACCTCTAAGCAAGTGGATGTACTTGTGTACAGGGCTCACTGCTA  
GGAGCAGCCACTTGTGTTCTACAAAACCTGGTACTTGTGTACAGTCTCTCTGCCGACAGTGGTCCCAA  
TGACAGGGCTCACTGCTAGGAGGACCGGTGGGAGCCACCAACTATGCCTATATAAGGTTTTGCTATT  
CATTGAAAGCAGTAGTGACTGATTTGTATATA

>MinSyn\_1165|Strength:0.000961364  
GCGTGTCTGTTTTAGTGAGGTTTTCAACAAGCAAGACCTCTACGGAAAAAGAAGAGGTCGACCACTATG  
CCCAATTAGGTTCTATATAAGGTTTTGCTATTTCATTGAAAGCAGTAGTGACTGATTTGTATATA

>MinSyn\_1363|Strength:0.00096184  
GCGTGTCTGTTTTAGTGAGGTCACTATCAGCAGGGCTCATCAGAAGATCAAAGGGCTAGACCGATGCTG  
ATCTTGCCTGCCTTGTATGCCATCAACAAATAATCCAAGTAAGTGCCCAATTAGGTTGTCTGCCTATA  
TAAGGTTTTGCTATTTCATTGAAAGCAGTAGTGACTGATTTGTATATA

>MinSyn\_1266|Strength:0.000963272  
GCGTGTCTGTTTTAGTGAGGTGAAGCATCTTCTTAGGCTATCAGCTTATTGCGATAAAGGAAAGGCGAG  
CAAGTGGATGGCTATCAGCTTAGCAAGACCTCTACAAAATCCATCAACAAATAATCCAAGTAAGCTCC  
TATATAAGGTTTTGCTATTTCATTGAAAGCAGTAGTGACTGATTTGTATATA

>MinSyn\_1205|Strength:0.000964954  
GCGTGTCTGTTTTAGTGAGGCTTTGTCAAAGCTAAAAAGATGATGCTATCAGCTTAGCAAGACCTC  
TACAAAACCTAGGTGGCTCCTACCACATGTAGTCCATCAACAAATAATCCAAGTAAGTGCTTGAACCC  
ACGTCTACAAACAGGGCTCACTGCTAGGAGGACCAACCATTATTGCGCAAACTGGTACTTGTCTATA  
TAAGGTTTTGCTATTTCATTGAAAGCAGTAGTGACTGATTTGTATATA

>MinSyn\_1719|Strength:0.000966253  
GCGTGTCTGTTTTAGTGAGGTGGTGGAGCACGACCCAATTAGGTTGTCTGGTGGGAGCCACCAGCTA  
TCAGCTTAGCAAGACCTTCTACTATCAGCGGTAGGTCACGACCACTATGAATTTTCGGGAAACCTCCT  
CGTGTACAGGGCTCACTGCTATATAAGGTTTTGCTATTTCATTGAAAGCAGTAGTGACTGATTTGTATA  
TA

>MinSyn\_1248|Strength:0.000968293  
GCGTGTCTGTTTTAGTGAGGGCTTTGTCAAAGCTAAAAAGATGATGCCTGCACCTCACATGTAGGCT  
ATCACAAATATTTCTTGTCTCACATGTAGGCTATCAGCTTAGCAAAACCAATTATTGCGTAGGAGGACC  
GATCAGTGGTCCCTCCACAATCCTTACCGCTATGGGTAAGATTGTAGGCTATTTTTCAACAATAGGAG

GACCGATGCTGATCTTATTGCGATAAAGGAAAGGAGGTCACGACCACTATGCCCAATTAGCTATATAA  
GGTTTTGCTATTCATTGAAAGCAGTAGTACTGATTTGTATATA

>MinSyn\_1035|Strength:0.000973405

GCGTGTTCGTTTTAGTGAGGGCTTTGTCAAAGCTAAAAAGATGATGCCCTGGCACACCAGCATGTGT  
TGATCACCAGCTTGACAGGGCTCACTTGAAGCATCTTCTGTCTGCACCTCACATGTAGGCTATCAG  
GGAAAAAGAAGAGGTCCTGCCTTGATCTATATAAGGTTTTGCTATTCATTGAAAGCAGTAGTACTGA  
TTTGTATATA

>MinSyn\_1703|Strength:0.000974815

GCGTGTTCGTTTTAGTGAGGAACCATTATTGCGGTCTGCACCTCACATGTAGGCTAGGTGGCTCCTACG  
ATGCTGATCTTGCCTCTATATAAGGTTTTGCTATTCATTGAAAGCAGTAGTACTGATTTGTATATA

>MinSyn\_1149|Strength:0.000976114

GCGTGTTCGTTTTAGTGAGGAATTTGGGAAACCTCCTCGAGCAAGACCTCTACAAAACAAAAATGTCA  
AAGATATGCTGATCTTGGCGCACACCAGCATGTGTTGATCACCAGCTGATGCTGAGCAAGTGGATACC  
TCTACAAAACCTGGTACTCTATATAAGGTTTTGCTATTCATTGAAAGCAGTAGTACTGATTTGTATAT  
A

>MinSyn\_1922|Strength:0.000977309

GCGTGTTCGTTTTAGTGAGGTCATATCAGCTGCCTGCATCGAAAGGACAGTACTGGTACTTGTGTACA  
GGGCTCACTGCTGTGGGAGCCACCATACAAAACCTGGTACTTGTCAAATATTTCTTGTGGCTATCAGCT  
TAGCATCCATCAACAAATAATCCAAGTAAGCGATGCTGATCTTGCCTGCCCTATATAAGGTTTTGCTA  
TTCATTGAAAGCAGTAGTACTGATTTGTATATA

>MinSyn\_1647|Strength:0.000977852

GCGTGTTCGTTTTAGTGAGGATTGCGATAAAGGAAAGGCAGGGCTCACTGCTAGGAGTCACTATCAGCC  
TGCTAGGAGGACCGATGCTGATCTTGCCTCTATATAAGGTTTTGCTATTCATTGAAAGCAGTAGTGAC  
TGATTTGTATATA

>MinSyn\_1706|Strength:0.000980234

GCGTGTTCGTTTTAGTGAGGGCACACCAGCATGTGTTGATCACCAGCTTACTTGTGTACAGGATCGAAA  
GGACAGTAGACCGATGCAAATATTTCTTGTGGCTATCAGCTTAGCAAGACCTCTACAATCAGAAGATC  
AAAGGGCTATCACTGCTAGGAGGACCGCTATATAAGGTTTTGCTATTCATTGAAAGCAGTAGTACTG  
ATTTGTATATA

>MinSyn\_1388|Strength:0.00098125

GCGTGTTCGTTTTAGTGAGGCAGTGGTCCCTCCACACTGGTACTTGTGTACAGGAACCATTATTGCGCA  
AGACCTCTACAAAACCTGGTACTTGTATGACCCCGCGGATGACGCGGGAGCTATCAGCTTACTATA  
TAAGGTTTTGCTATTCATTGAAAGCAGTAGTACTGATTTGTATATA

>MinSyn\_1540|Strength:0.000983007

GCGTGTTCGTTTTAGTGAGGAGCAAGTGGATCACATGTAGGCCAGTGGTCCCTCCACTGATCTTGCCTG  
CCTGGTGGAGCACGACACCGATGCTGATCTTGCCTATATAAGGTTTTGCTATTCATTGAAAGCAGTAG  
TACTGATTTGTATATA

>MinSyn\_1015|Strength:0.000985196

GCGTGTTCGTTTTAGTGAGGTCCATCAACAAATAATCCAAGTAAGAAAAAGATTGATGAAAAGTCAAAA  
ACAAAAATCAATTACTTGTGTACAGGGCTCACTGGCTTTGTCAAAGCTAAAAAGATGATGCTA  
GCAAGACCTCTACAAAATGTCAAAGATATCAGCTTAGCAAGACCTGGTGGAGCACGACATACAAAAC  
CTATATAAGGTTTTGCTATTCATTGAAAGCAGTAGTACTGATTTGTATATA

>MinSyn\_1577|Strength:0.000988161

GCGTGTTCGTTTTAGTGAGGAGGTGGCTCCTACCTCACTGCTAGGAGGACCGATGCGCTTTGTCAAAG  
CTAAAAAAGATGATGCAAGTCTCTCTGCCGACAGTGGTCCCAAAGTGTACAGTGGTGGAGCACGACAC  
CACTATGCCCAATTAGTTGTCTGCCTATATAAGGTTTTGCTATTCATTGAAAGCAGTAGTACTGAT  
TTGTATATA

>MinSyn\_1676|Strength:0.000989401

GCGTGTTCGTTTTAGTGAGGGGAAAAAGAAGAGGTATCCATCAACAAATAATCCAAGTAAGTTAGCAAG  
TGGATACTGGTGCTTTGTCAAAGCTAAAAAGATGATGCACAAAACCTGGTACTTGTGTACAGGGCTT  
TTCAACAATGCACCTCACATGTAGGCTTCTCTCTGCCGACAGTGGTCCCAAACCTGCTAGATTGCGAT  
AAAGGAAAGGAGTTGTCTGCACCTCACATGTCTATATAAGGTTTTGCTATTCATTGAAAGCAGTAGT  
ACTGATTTGTATATA

>MinSyn\_1683|Strength:0.000990577

GCGTGTCTGTTTTAGTGAGGATGAGCTAAGCACATACGTCAGAGGACCGGAAAAAGAAGAGGTTATGCC  
CAATTAGGTTGTCTGCACCTACCAAATATTTCTTGTAGCAAGACCTCTACAAAAGTGGTACTTTCCAC  
TATCAGCGCAGTGGTCCCTCCACACAGGGCTCACTGCTAGGAGGACCGATTGAAGCATCTTCCCCTCC  
ATCAACAAATAATCCAAGTAAGCTAGGAGGACCGATGCTGAATTGCGATAAAGGAAAGGCAATTAGGT  
TGTCTGCACCTCTTTTCAACAAACAAAAGTGGTACTTGTGTACAGGGCCTATATAAGGTTTTGCTATT  
CATTGAAAGCAGTAGTGACTGATTTGTATATA

>MinSyn\_1130|Strength:0.000991146

GCGTGTCTGTTTTAGTGAGGGCACACCAGCATGTGTTGATCACCAGCTCGATGCTGATCTTGCCTGCCT  
TTATGACCCCCCGCGATGACGCGGGAACCTCACATGTAGGCTACAAATATTTCTTGTGTTGTCTGCAC  
CTCACATGTAGGTCCATCAACAAATAATCCAAGTAAGAGCTTAGCAAGAGCTTTGTCAAAGCTAAAA  
AAGATGATGCGGTACTTGTGTACAGGGCTCACTGCTAGTCTCTCTGCCGACAGTGGTCCCAAATCACA  
TGTAGGCTATCAGCTTAGCTGGTGGAGCACGACAGGAGGACTCAGAAGATCAAAGGGCTATCACATGT  
AGGCAACCATTATTGCGTATGCCCAATTAGGTTGTCTGCACCTCTATATAAGGTTTTGCTATTCATTG  
AAAGCAGTAGTGACTGATTTGTATATA

>MinSyn\_1243|Strength:0.000991743

GCGTGTCTGTTTTAGTGAGGTCATATCAGCCACGACCACTATGCTTTTCAACAAAAGTCTATATAAGGT  
TTTGCTATTCATTGAAAGCAGTAGTGACTGATTTGTATATA

>MinSyn\_1977|Strength:0.000992454

GCGTGTCTGTTTTAGTGAGGCAAATATTTCTTGTACTGCTAGGAGGACCGATGCATCCTTACCGCTATG  
GGTAAGATTCTCTACAAAAGTGGTACTTGTGTACAGGGCCAGCCACTTGTGTCCTCTACGGAAAAAGA  
AGAGGTGACCGATGCTGATCTTGTGAAGATAAGATAATAATGTTGAAGATAAGACACCTCACATGTAG  
GCTATCAGCTTAGCTGAAGCATCTTCTAGGCTATCAGCTTAGCAAGATGGTGGAGCACGACATGCCC  
AATTAGGTTGTCTGCACCTCACTTATGACCCCCCGCGATGACGCGGGACTCACTGCTAGGAGGACCGT  
TTTCAACAAGCGGTAGGTCACGACCACTATGCCCAATTCTATATAAGGTTTTGCTATTCATTGAAAGC  
AGTAGTGACTGATTTGTATATA

>MinSyn\_1815|Strength:0.000993654

GCGTGTCTGTTTTAGTGAGGTTATGACCCCCCGCGATGACGCGGGAAGGGCTCACTGCTGGTGGAGCAC  
GACATGCACCTCACATGTAGGCATCCTTACCGCTATGGGTAAGATTTGTAGGCTATCAGCTTAGCAAG  
ACCTCTACCTATATAAGGTTTTGCTATTCATTGAAAGCAGTAGTGACTGATTTGTATATA

>MinSyn\_1373|Strength:0.000994991

GCGTGTCTGTTTTAGTGAGGTCCTCTGCGGACAGTGGTCCCAAAGACCACTATGCCCAATTAGGTCAG  
CCACTTGTGTACAAAAGTGGTACTTGTGTACAGGGCATCCTTACCGCTATGGGTAAGATTATCTTGCC  
TGCCTCTATATAAGGTTTTGCTATTCATTGAAAGCAGTAGTGACTGATTTGTATATA

>MinSyn\_1356|Strength:0.000996292

GCGTGTCTGTTTTAGTGAGGGCACACCAGCATGTGTTGATCACCAGCTACATGTAGGCTATCAGCTTAG  
CAAGACCGCTTTGTCAAAGCTAAAAAAGATGATGCGCACCTCACATGTAGGCTGAAGCATCTTCCCTG  
ATCTTGCCTGTCACTATCAGCCTGCACCTCACATGTAGGCTATCAGCTTAAAAAATGTCAAAGATAAC  
TATGCCCAATTAGATCCTTACCGCTATGGGTAAGATTCATGTAGGCTATTGCGATAAAGGAAAGGAGG  
ATCAGAAGATCAAAGGGCTAGTAGGTCACGACCACTATGCCCAATCAGTGGTCCCTCCACACCTCTAC  
AAAAGTGGTACTTGTGTACCTATATAAGGTTTTGCTATTCATTGAAAGCAGTAGTGACTGATTTGTAT  
ATA

>MinSyn\_1106|Strength:0.000996677

GCGTGTCTGTTTTAGTGAGGGCACACCAGCATGTGTTGATCACCAGCTACAAATCGAAAGGACAGTAAA  
ACTGGTACTTGTGAAGCATCTTCCACCACTAAAAATGTCAAAGATAAGGTTGTCTGCACCTCACATG  
TAGGCTATCAGGTGGCTCCTACTGCTGAAATTTGGGAAACCTCCTCGCCAATTAGGTTGTCTGGCTT  
TGTCAAAGCTAAAAAAGATGATGCTTAGGTTGTCTGCACCTCACATGAAGATAAGATAATAATGTTG  
AAGATAAGACTAGGAGGACTATATAAGGTTTTGCTATTCATTGAAAGCAGTAGTGACTGATTTGTATA  
TA

>MinSyn\_1473|Strength:0.000998978

GCGTGTCTGTTTTAGTGAGGTCATCAACAAATAATCCAAGTAAGTTAAACCACGTCTACAAACATGTA  
GGCTATCAGCTTAGCAAGACCATCCTTACCGCTATGGGTAAGATTGGACCGATGCTGATCTTGCCTGC  
CTTGCAGCCACTTGTGTAAAGTGGTCACTGGTCCCTCCACGACCGATGCTGATCTTGCCTTCACTAT  
CAGCTTGTCTGCACCTCACATGCTATATAAGGTTTTGCTATTCATTGAAAGCAGTAGTGACTGATTTG  
TATATA



>MinSyn\_1476|Strength:0.001002206  
GCGTGTCTGTTTTAGTGAGGCAAATATTTCTTGTGCGGGTAGGTCACGACCACTATGAGGTGGCTCCTA  
CGGTAGGTCACGACCACTATATAAGGTTTTGCTATTCATTGAAAGCAGTAGTGACTGATTTGTATATA

>MinSyn\_1845|Strength:0.001004088  
GCGTGTCTGTTTTAGTGAGGAGGTGGCTCCTACGGTAGGTCACGACCACTATGCCCAATTAGATTGCGA  
TAAAGGAAAGGGAGGACCGATGCTGATCTTGCCTGCCTGAAGATAAGATAATAATGTTGAAGATAAGA  
CGATGCTGATCTTGCCTGCCTTCACTATCAGCGAGCAAGTGGATTACGACCACTATGCCCAATTAGG  
TTGAAGATTGATGAAAAGTCAAAAACAAAAATCAATTATAACCACTATGCCCAATTAGGTTGCCTATA  
TAAGGTTTTGCTATTCATTGAAAGCAGTAGTGACTGATTTGTATATA

>MinSyn\_1832|Strength:0.001005226  
GCGTGTCTGTTTTAGTGAGGATGACGTAAGCCATGACGTCTAACTTGTGTACAGGGCTCACTGCTAGGA  
GGAAGCAAGTGGATCCACTATGCCCAATTATTTTCAACAACCTCACATGTAGGCTATCAGCTTAGCAG  
GTGGCTCCTACCAATTAGGTTGTCTGCACCTCATCAGAAGATCAAAGGGCTAAGACCTCTACAAAACC  
ATTATTGCGCACTGCTAGGAGGCACACCAGCATGTGTTGATCACCAGCTCCTCACATGTAAAAAATGT  
CAAAGATATATGCCCAATTAGGTTGTCTGCACTCTCTCTGCCGACAGTGGTCCCAAATGCTAGGAGGA  
CCGATGCTGATCTTGCCTCTATATAAGGTTTTGCTATTCATTGAAAGCAGTAGTGACTGATTTGTATA  
TA

>MinSyn\_1596|Strength:0.001006079  
GCGTGTCTGTTTTAGTGAGGATCCTTACCGCTATGGGTAAGATTTGTAGGCTATCAGCTTCTCTCTGCC  
GACAGTGGTCCCAAAAAAACTGGTACTTGTGTACAGGGCTCACTGTCACTATCAGCGTACAGGGCTCA  
CTGCTGCACACCAGCATGTGTTGATCACCAGCTTACAGGGCTCACTGCTAGGAGGACCGACTATATAA  
GGTTTTGCTATTCATTGAAAGCAGTAGTGACTGATTTGTATATA

>MinSyn\_1985|Strength:0.00100963  
GCGTGTCTGTTTTAGTGAGGAACCATTATTGCGCACCTCACAAACCACGTCTACAAGTAGGCTATCAGC  
TTAGCAAGACCTCTACTATATAAGGTTTTGCTATTCATTGAAAGCAGTAGTGACTGATTTGTATATA

>MinSyn\_1455|Strength:0.00101028  
GCGTGTCTGTTTTAGTGAGGTCCTATCAGCTTTTTTCAACAATCTGCACCTCACATCTATATAAGGTTT  
TGCTATTCATTGAAAGCAGTAGTGACTGATTTGTATATA

>MinSyn\_1007|Strength:0.001011806  
GCGTGTCTGTTTTAGTGAGGTGGTGGAGCACGACATCAGCTTAGCAAGACCCAAATATTTCTTGTGCTC  
ACTGCTAGGAGGACCGATGCTGATCTATATAAGGTTTTGCTATTCATTGAAAGCAGTAGTGACTGATT  
TGTATATA

>MinSyn\_1249|Strength:0.001012206  
GCGTGTCTGTTTTAGTGAGGACAGTGGTCCCTCCACCAAGACCTCTACAGGTGGCTCCTACACCGATGCT  
GATCTTGCCTGCCGCACACCAGCATGTGTTGATCACCAGCTTATCAGCTTAGCAAGACCTCTATTGCC  
ATAAAGGAAAGGCACCTCACATGTAGGCTATCAGCTTAGCAAACCACGTCTACAACAGGGCTCACTGC  
TATCAGAAGATCAAAGGGCTAACCTCTACAAAACCTGGTACTTGTCTATATAAGGTTTTGCTATTCATT  
GAAAGCAGTAGTGACTGATTTGTATATA

>MinSyn\_1195|Strength:0.001013584  
GCGTGTCTGTTTTAGTGAGGATCCTTACCGCTATGGGTAAGATTGTAGGTCACGACCACTATGCCCAA  
CCACGTCTACAAACAAAACCTGGTACTTGTGTTGAAGCATCTTCTGTGTACAGGGCTATATAAGGTTT  
TGCTATTCATTGAAAGCAGTAGTGACTGATTTGTATATA

>MinSyn\_1137|Strength:0.001013703  
GCGTGTCTGTTTTAGTGAGGTTATGACCCCCGCCGATGACGCGGGAGAGGACCGATGCTGATCTTGCCT  
GCCTTGAGCACACCAGCATGTGTTGATCACCAGCTGTCTCTCTGCCGACAGTGGTCCCAAAGGTAGGT  
CACGGCTTTGTCAAAGCTAAAAAAGATGATGCAGGTCACGACTATATAAGGTTTTGCTATTCATTGA  
AAGCAGTAGTGACTGATTTGTATATA

>MinSyn\_1591|Strength:0.001014042  
GCGTGTCTGTTTTAGTGAGGACGCACTTGTGTGTGTACAGGGCTCACTGCTTTATGACCCCCGCCGAT  
GACGCGGGAGGACCGATGCTGATCTTGTATATAAGGTTTTGCTATTCATTGAAAGCAGTAGTGACTG  
ATTTGTATATA

>MinSyn\_1199|Strength:0.00101415  
GCGTGTCTGTTTTAGTGAGGTGGTGGAGCACGACACATGTAGGCTATCAGCTTAGCAATCCATCAACAA  
ATAATCCAAGTAAGTTAGGTTGTCTAGCAAGTGGATAGGGCTCACTGCTAGGAGGATCCTTACCGCTA

TGGGTAAGATTGCCTGCCAGGTGGCTCCTACAATTAGGTTGTCTGCACCTCACATGTCTATATAAGGT  
TTTGTCTATTCATTGAAAGCAGTAGTGACTGATTTGTATATA

>MinSyn\_1879|Strength:0.00101447

GCGTGTTCGTTTTAGTGAGGTCACATCAGCCTACAAAGCACACCAGCATGTGTTGATCACCAGCTATT  
AGGTTGTCTAGGTGGCTCCTACTATGCCCAATTAGGTTGTCTGCACCTCACATGAAGCATCTTCCATC  
TTGCTGCCTTGCTATATAAGGTTTTGCTATTCATTGAAAGCAGTAGTGACTGATTTGTATATA

>MinSyn\_1400|Strength:0.001014501

GCGTGTTCGTTTTAGTGAGGAGCAAGTGGATCTATGCCCAATTAGGTTGTCTGCACCTCACGCTTTGTC  
AAAAGCTAAAAAAGATGATGCGTCTGCACCTCACATGTAGGTGGGAGCCACCACATCCATCAACAAAT  
AATCCAAGTAAGCTGTGGTGGAGCACGACAGCCGATGCTGATCTTGCCTATATAAGGTTTTGCTAT  
TCATTGAAAGCAGTAGTGACTGATTTGTATATA

>MinSyn\_1918|Strength:0.001016175

GCGTGTTCGTTTTAGTGAGGGCACACCAGCATGTGTTGATCACCAGCTAGGTTGTCTGCACCTCACATG  
TAGAGCAAGTGGATCAGCTTAGCAAGACCTCTACAAAAGTGGTAAGATTGATGAAAAGTCAAAAACAA  
AAATCAATTATAAAAAGTGGTACTTGTGTACAGGGCCAAATATTTCTTGTTATCAGCTTAGCATCACTA  
TCAGCACCGATGCTGATCTTCCATCAACAAATAATCCAAGTAAGCGATGCTGATCTTGCCTGCCTTGA  
TCTATATAAGGTTTTGCTATTCATTGAAAGCAGTAGTGACTGATTTGTATATA

>MinSyn\_1560|Strength:0.001018824

GCGTGTTCGTTTTAGTGAGGTGGTGGAGCACGACATCTGCACCTCACATGTAGGCTATCAATCGAAAGG  
ACAGTAAGACCTCTACAAAACAAATATTTCTTGCTCTCACTATCAGCCCAATTAGGTTGTCTGCACCTC  
ACTCAGAAGATCAAAGGGCTATCTACAAAAGTGGTACTTATGACCCCGCCGATGACGCGGGAACCTC  
TACAAAAGTGGTACTTGTGTACAGGCTATATAAGGTTTTGCTATTCATTGAAAGCAGTAGTGACTGAT  
TTGTATATA

>MinSyn\_1742|Strength:0.001019111

GCGTGTTCGTTTTAGTGAGGAGGTGGCTCCTACCGATGCTGATCTTGTTATGACCCCGCCGATGACGC  
GGGAAGGAGGACCGATGTCTCTGCGGACAGTGGTCCCAAAACATGTAGGCTATCAGCTTATCACTA  
TCAGCGGTACTTGTGTACAGGGCTCACTTTTTCAACAACACTATGCCCACTATATAAGGTTTTGCTAT  
TCATTGAAAGCAGTAGTGACTGATTTGTATATA

>MinSyn\_1471|Strength:0.001019895

GCGTGTTCGTTTTAGTGAGGTCCATCAACAAATAATCCAAGTAAGCTTGCCTGCCTTGATGATATCTCT  
CTGCCGACAGTGGTCCCAATGTGTACAGGGCTCACTGCTAGGAGGACCATTGCGATAAAGGAAAGGC  
TACAAACCACGTCTACAAGTACGACCACTATGAACCATTATTGCGTACTTGTGTACAGGGCTCACTG  
CTAGGAGGCTATATAAGGTTTTGCTATTCATTGAAAGCAGTAGTGACTGATTTGTATATA

>MinSyn\_1334|Strength:0.001021756

GCGTGTTCGTTTTAGTGAGGATGAGCTAAGCACATACGTCAGTGTCTGCACCTCACATGTAGGCTATAA  
CCACGTCTACAAACAAAAGTGGTCCATCAACAAATAATCCAAGTAAGACTGCTAGGAGGACCGATGCT  
GATCTGCTTTGTCAAAGCTAAAAAAGATGATGCTGCCTGCCTTGATTTTTCAACAATCTGCACCTCA  
CATGTAGGCTATCAGCACACCAGCATGTGTTGATCACCAGCTTCTTGCTGCCTCTCTCTGCCGACAG  
TGGTCCCAAACTACAAAAGTGGTACTTGTGTACAGGATTGCGATAAAGGAAAGGTAAGTGTGTACACT  
ATATAAGGTTTTGCTATTCATTGAAAGCAGTAGTGACTGATTTGTATATA

>MinSyn\_1092|Strength:0.001023812

GCGTGTTCGTTTTAGTGAGGTTTTCAACAACAATTTTCGGGAAACCTCCTCGTCACTGCTAGGAGGACCG  
ATGCTGGAAAAAGAAGAGGTGCGGGTAGGCAAATATTTCTTGTTGGAGGACCGATGCTGATAGGTGGCT  
CCTACGGTAGGTACGACCAAGATTGATGAAAAGTCAAAAACAAAATCAATTATTCGCGGTAGGTCA  
CGACCACTATCAGCCACTTGTGTAGCAAGACCTCTACAAAAGTGGTACTTGTGTATATAAGGTTTTGCT  
ATTCATTGAAAGCAGTAGTGACTGATTTGTATATA

>MinSyn\_1470|Strength:0.001026056

GCGTGTTCGTTTTAGTGAGGATCGAAAGGACAGTATCTGCACCTCACAAACCACGTCTACAATACAAA  
CTGGTACTTGTGTACAGGGCTCCTATATAAGGTTTTGCTATTCATTGAAAGCAGTAGTGACTGATTTG  
TATATA

>MinSyn\_1886|Strength:0.001026387

GCGTGTTCGTTTTAGTGAGGTTTTCAACAACATGTAGGCTATCAGCTTAGCAAGACCTAACCAATTATT  
GCGCTCTACAAAAAATGTCAAAGATACGATGCTGATCTATATAAGGTTTTGCTATTCATTGAAAGCAG  
TAGTGACTGATTTGTATATA

>MinSyn\_1066|Strength:0.001027709  
GCGTGTTCGTTTTAGTGAGGATCGAAAGGACAGTATCACTGCTAGGAGGACCGATGCTGATCAAAAATG  
TCAAAGATATAGGAGGACCGATGCAAGATTGATGAAAAGTCAAAAACAAAATCAATTATACCTCACA  
TGTAGGCTATCAGCTTAGAATTCGGGAAACCTCCTCGCCAATTAGGTTGTCTGCACCTCACTATATA  
AGGTTTTGCTATTCATTGAAAGCAGTAGTGACTGATTTGTATATA

>MinSyn\_1245|Strength:0.001030027  
GCGTGTTCGTTTTAGTGAGGAACCATTATTGCGTCAGCTTAGCTTTTCAACAACGATGCTGATCTAATT  
TCGGGAAACCTCCTCGATGTAGGCTATCAGCTTTTATGACCCCCGCCGATGACGCGGGAACAGGGCTC  
ACTGCTAGGAGGACCGATATTGCGATAAAGGAAAGGATCAGCTTAGCAAGACCTCTACAAAAGCACAC  
CAGCATGTGTTGATCACCAGCTGGTTGTCTGCACCTCACATGTAGGCTCTATATAAGGTTTTGCTATT  
CATTGAAAGCAGTAGTGACTGATTTGTATATA

>MinSyn\_1024|Strength:0.001030622  
GCGTGTTCGTTTTAGTGAGGATCCTTACCGCTATGGGTAAGATTGGACCGATGCTGATCTTGCCAGCAA  
GTGGATTTGTGTACAGGGCTCACTGCTATCACTATCAGCTGATCTTGCTGCCTTGATGAAGCATCTT  
CCGACCTCTACAAAACCTGGTACTTGGAAAAAGAAGAGGTGAGGACCGATGCTGATCTTGCTGCAGAA  
TTGATGAAAAGTCAAAAACAAAATCAATTATGCTTAGCAAGACCTCTAAAAATGTCAAAGATAGAGG  
ACCGATGCTGAAGGTGGCTCCTACACGACCACTATGCCCAATTAGCTATATAAGGTTTTGCTATTCAT  
TGAAAGCAGTAGTGACTGATTTGTATATA

>MinSyn\_1296|Strength:0.00103128  
GCGTGTTCGTTTTAGTGAGGCAAATATTTCTTGTTCATCGAAAGGACAGTAGCAGCCACTTGTGTGTACT  
TGTGTACAGGGCTCACTGCTAGGATTTTCAACAAAGGGCTCACTGCTAGGAGGACCGATGCTATTGCG  
ATAAAGGAAAGGGGACCGATGCTGATCTTGCTGCCTATCCTTACCGCTATGGGTAAGATTATTAGGT  
TGTCTGCACCTCAGGTGGCTCCTACGCTCACTGCTAGCTATATAAGGTTTTGCTATTCATTGAAAGCA  
GTAGTGACTGATTTGTATATA

>MinSyn\_1328|Strength:0.001031308  
GCGTGTTCGTTTTAGTGAGGAGGTGGCTCCTACGCCGTGGGAGCCACCAGTAGGTCACGACCACTATGC  
CCAATTGCACACCAGCATGTGTTGATCACCAGCTCTGGTACTTGTGTACAGGGCCTATATAAGGTTTT  
GCTATTCATTGAAAGCAGTAGTGACTGATTTGTATATA

>MinSyn\_1379|Strength:0.001032382  
GCGTGTTCGTTTTAGTGAGGAGCAAGTGGATGGTCCAGCACCCTAATTGCGATAAAGGAAAGGGACCTC  
TACAAAACCTGGTACTTGTGTACATTATGACCCCCGCCGATGACGCGGGATGTCTGCACCTCACATGTT  
CAGAAGATCAAAGGGCTACCTCTACAAAACCTGGTTCCATCAACAAATAATCCAAGTAAGCAATTCAGC  
CACTTGTGTATGCTGATCTTGCTGCCTTGATGCAGTGGTCCCTCCACCACCTCACATGTAGGCTATC  
AGCTCTATATAAGGTTTTGCTATTCATTGAAAGCAGTAGTGACTGATTTGTATATA

>MinSyn\_1258|Strength:0.001033333  
GCGTGTTCGTTTTAGTGAGGATCGAAAGGACAGTAGTGACAGGGCTCACTGCTAGGAGGACCAACCAC  
GTCTACAATCAGCTTAGCAAGCTATATAAGGTTTTGCTATTCATTGAAAGCAGTAGTGACTGATTTGT  
ATATA

>MinSyn\_1329|Strength:0.001037241  
GCGTGTTCGTTTTAGTGAGGTGGTGGAGCACGACAATCTTGCTGCCTTGATGATGGAAAAAGAAGAGG  
TCTAGGAGGACCGATGCTGATCTTGCTATATAAGGTTTTGCTATTCATTGAAAGCAGTAGTGACTGAT  
TTGTATATA

>MinSyn\_1298|Strength:0.001038432  
GCGTGTTCGTTTTAGTGAGGTGAAGATAAGATAAATAATGTTGAAGATAAGATGTGTACAGGGCTCACTG  
CTAGGAGGACCAACCATTATTGCGTACTTGTGTACAGTTTTCAACAACACTATCTATATAAGGTTTTG  
CTATTCATTGAAAGCAGTAGTGACTGATTTGTATATA

>MinSyn\_1960|Strength:0.001038463  
GCGTGTTCGTTTTAGTGAGGCAGCCACTTGTGTCACTAACCACGTCTACAAGAATTCGGGAAACCTCC  
TCGGGACCGATGCTGATCTTGCTGCCTGCGTGGGAGCCACCACACTGCTAGGAGGACCGATGCTGATCTT  
GCGGAAAAAGAAGAGGTACTTTGAAGCATCTTCCAGACCTCTACAAAACCTCTATATAAGGTTTTGCTA  
TTCATTGAAAGCAGTAGTGACTGATTTGTATATA

>MinSyn\_1466|Strength:0.001038565  
GCGTGTTCGTTTTAGTGAGGTGAAGATAAGATAAATAATGTTGAAGATAAGAGACCGATCTCTCTGCCGA  
CAGTGGTCCCAAACTTGTAGGTGGCTCCTACCTGATGTGGGAGCCACCAACAGGGCTCACTGCGGAA

AAAGAAGAGGTAGCTTAGCAAGACCTCTACAAAACCTGTTTTCAACAAGCTAGGAGGACCGATGCTGAT  
CTTGATCCTTACCGCTATGGGTAAGATTTATCAGCTTAGCAAGACCTCTACAACTATATAAGGTTTTG  
CTATTCATTGAAAGCAGTAGTACTGATTTGTATATA

>MinSyn\_1627|Strength:0.001040714

GCGTGTGTTTTAGTGAGGCAGCCACTTGTGTATCAGCTTAGCAAGACCTCTACAAAAAAAATGTCA  
AAGATAATGCTGATCTTGCCCTATATAAGGTTTTGCTATTCATTGAAAGCAGTAGTACTGATTTGTA  
TATA

>MinSyn\_1175|Strength:0.001041216

GCGTGTGTTTTAGTGAGGATCGAAAGGACAGTACAATGGTGGAGCAGACAACAAAACCTGGTACTTG  
TGTACAGGGCTTCTCTCTGCCGACAGTGGTCCCAAAGACCTCTACAAAACCTATATAAGGTTTTGCTA  
TTCATTGAAAGCAGTAGTACTGATTTGTATATA

>MinSyn\_1273|Strength:0.001042256

GCGTGTGTTTTAGTGAGGATCCTTACCGCTATGGGTAAGATTCCAATTAGGTTGTCTGCACCTCAC  
ATGATCGAAAGGACAGTATACAGGGCTCACTGCTAGGAGGATGAAGCATCTTCCATGCTCACTATCAG  
CCTCACTGCTAGGAGGACCGATGCTGATCTAAGATTGATGAAAAGTCAAAAACAAAATCAATTATCA  
CTGCTAGGAGGACCGATGCTGATCAATTTGGGAAACCTCCTCGGCTAGGAGGACCGATGCTGATCTT  
GCAACCAGTCTACAACGGTAGGTCACGACCACTCTATATAAGGTTTTGCTATTCATTGAAAGCAGTA  
GTGACTGATTTGTATATA

>MinSyn\_1366|Strength:0.001042843

GCGTGTGTTTTAGTGAGGGTGGGAGCCACCACAGGGCTCACTGCTAGGCTTTGTCAAAGCTAAAAA  
AGATGATGCACTGCTAGGAGCAAGTGGATACATGTAACCATTATTGCGGAGGACCGATGCTCACTATC  
AGCATCAGCTTAGGAAAAAGAAGAGGTACATGTAGGCTATCAGCTTAGCAATGAAGATAAGATAATAA  
TGTTGAAGATAAGATATCAGCTTAGCAAGACCTCTACAAAACCTTTATGACCCCCGCCGATGACGCGGG  
AACAGGGCTCACTGCTAGGAGGACCGATGCCAGTGGTCCCTCCACGTAGGTCACCTATATAAGGTTTT  
GCTATTCATTGAAAGCAGTAGTACTGATTTGTATATA

>MinSyn\_1984|Strength:0.001043173

GCGTGTGTTTTAGTGAGGTCCATCAACAAATAATCCAAGTAAGTGTCTGCACCAACCACGTCTACAA  
ACAGGGCTCACTGCAATTTCCGGAAACCTCCTCGGCACCTCACATGTAGGCTAGCTTTGTCAAAGCT  
AAAAAAGATGATGCCTACAAAACCTGAACCATTATTGCGGTGTACAGGGCTCACTGCTAGGAGGAAAAA  
GAAGAGGTGTGTACAGGGTTATGACCCCCGCCGATGACGCGGGAAGGCTATCAGCTTAGCAAGACCTC  
TTCAGAAGATCAAAGGGCTAATGTAGGCTATCAGCTCTATATAAGGTTTTGCTATTCATTGAAAGCAG  
TAGTACTGATTTGTATATA

>MinSyn\_1371|Strength:0.001043408

GCGTGTGTTTTAGTGAGGAACCACGTCTACAAGTAGGTCACGACCACTATGCCCATCCTTACCGCTA  
TGGGTAAGATTTGCTAGGAGGACCGATGCTGATCTTGCCTTGAAGATAAGATAATAATGTTGAAGATA  
AGAATGCCAATTTATGACCCCCGCCGATGACGCGGGAGCTATCAGCTTAGCAAGACCTCATCGAAAG  
GACAGTAAATTAGGTTGTCTGCACCTCACATGTAGCTATATAAGGTTTTGCTATTCATTGAAAGCAGT  
AGTACTGATTTGTATATA

>MinSyn\_1825|Strength:0.001043524

GCGTGTGTTTTAGTGAGGGCTTTGTCAAAGCTAAAAAAGATGATGCGATGCTGATCTTGCCTGCCT  
TGATTCAGAAGATCAAAGGGCTAGTTGTCTGCACCTCTCTCTGCGGACAGTGGTCCCAAACAGCTT  
AGCAAGACCTCTACAGCCACTTGTGTGCTAGCTTAGCAAGACTATATAAGGTTTTGCTATTCATTGAAAG  
CAGTAGTACTGATTTGTATATA

>MinSyn\_1770|Strength:0.001044078

GCGTGTGTTTTAGTGAGGAATTTCCGGAAACCTCCTCGGTTGTCTGTCACTATCAGCCCTCTAGGAA  
AAAGAAGAGGTCAATTAGGTTGTCTGCACTCTCTCTGCCGACAGTGGTCCCAAAGATGCTGATCTTGC  
CTGCCTTGATGATCTATATAAGGTTTTGCTATTCATTGAAAGCAGTAGTACTGATTTGTATATA

>MinSyn\_1976|Strength:0.001044985

GCGTGTGTTTTAGTGAGGAACCACGTCTACAAAACAGGGCTCACTGCTAGGAGTCCATCAACAAATAA  
TCCAAGTAAGCAAGACCTCTACAAAACCTGGTACTTGTGTTGAAGCATCTTCCCTGCAGCCACTTGTGT  
CATCCTTACCGCTATGGGTAAGATTCGACCACTATGCCCAATTAGGTTGTCTTTTTCAACAATCGCGG  
TAGGTCACGACCACTATGCCCAATTCTCTCTGCCGACAGTGGTCCCAAACCTATCAGCTTAGCAAGACT  
ATATAAGGTTTTGCTATTCATTGAAAGCAGTAGTACTGATTTGTATATA

>MinSyn\_1262|Strength:0.001045603

GCGTGTTCGTTTTAGTGAGGCAGCCACTTGTGTAGGGCTCACTGCTAGGAGGAAAAAATGTCAAAGATA  
GGCTATCAGCTTAGCAAGCAGTGGTCCCTCCACGGTCACGACCACTCTATATAAGGTTTTGCTATTCA  
TTGAAAGCAGTAGTACTGATTTGTATATA

>MinSyn\_1189|Strength:0.001045763

GCGTGTTCGTTTTAGTGAGGTTATGACCCCGCCGATGACGCGGGAAGGTCACGACCACTATGCCCAAT  
GAAGCATCTTCCAGCATTTCACAATGTCTGCACCTCACATCTATATAAGGTTTTGCTATTTCATTGA  
AAGCAGTAGTACTGATTTGTATATA

>MinSyn\_1781|Strength:0.001047461

GCGTGTTCGTTTTAGTGAGGTCCATCAACAAATAATCCAAGTAAGTTCTCTCTGCCGACAGTGGTCCCA  
AAACCACTATGCCCAATTAGGTTGTCTGCAAGGTGGCTCCTACTAGGTCACGACCACAAAAATGTCAA  
AGATAGGCTCACTGCTAGGAGGACCGATGCTGATCAACCACGTCTACAACGGTATCGAAAGGACAGTA  
GACCGATGCTGATCTTGCTGCTATATAAGGTTTTGCTATTTCATTGAAAGCAGTAGTACTGATTTGT  
ATATA

>MinSyn\_1659|Strength:0.001049596

GCGTGTTCGTTTTAGTGAGGAGCAAGTGGATAGGTCACGAGGTGGCTCCTACCTCACTGCTAGGAGGAC  
CGATGTGAAGCATCTTCCGATCAGAAGATCAAAGGGCTAACGACCACTATGTTTTCAACAACCTTAGCA  
AGACCTCTACAAAAGTGGGCTTTGTCAAAAAGCTAAAAAAGATGATGCCAGGGCTCACTGCTAGGAGTG  
AAGATAAGATAATAATGTTGAAGATAAGACAGGGCAGTGGTCCCTCCACGTCTGCTATATAAGGTTTT  
GCTATTTCATTGAAAGCAGTAGTACTGATTTGTATATA

>MinSyn\_1439|Strength:0.001051705

GCGTGTTCGTTTTAGTGAGGTCCATCAACAAATAATCCAAGTAAGGTGTACATCAGAAGATCAAAGGGC  
TATCTGCACCTCACATCACTATCAGCCTCACATGTAGGCTATCATTTTCAACAATTGTGTACAGGGCC  
TATATAAGGTTTTGCTATTTCATTGAAAGCAGTAGTACTGATTTGTATATA

>MinSyn\_1167|Strength:0.001052239

GCGTGTTCGTTTTAGTGAGGGGAAAAAGAAGAGGTGATGAGGCTATCAGCTTAACCATTATTGCGGAT  
GCTGATCTTGCTGCTATATAAGGTTTTGCTATTTCATTGAAAGCAGTAGTACTGATTTGTATATA

>MinSyn\_1529|Strength:0.001054817

GCGTGTTCGTTTTAGTGAGGTGAAGATAAGATAATAATGTTGAAGATAAGAATCAGCTGGAAAAAGAAG  
AGGTTTAGGTTGTCTGCACCTCACATGTAGGCTAGCACACCAGCATGTGTTGATCACCAGCTCTATCA  
GCTTAGCAAGAAGATTGATGAAAAGTCAAAAACAAAAATCAATTATCTTGCTGCTTGGCTTTGTCA  
AAAGCTAAAAAAGATGATGCTACTTGTGTACACTATATAAGGTTTTGCTATTTCATTGAAAGCAGTAGT  
ACTGATTTGTATATA

>MinSyn\_1354|Strength:0.001055236

GCGTGTTCGTTTTAGTGAGGTCTCTCTGCCGACAGTGGTCCCAACAATTAGGTTGTCTGCACCTTCCA  
TCAACAAATAATCCAAGTAAGGCTATCAGCTTAGCAAGACCTTATGACCCCGCCGATGACGCGGGAG  
TGTACAGGGCTCACTGCTAGGAGGACCATCCTTACCCTATGGGTAAGATTTCACTGCTAGGAGGACC  
GATGCTCTATATAAGGTTTTGCTATTTCATTGAAAGCAGTAGTACTGATTTGTATATA

>MinSyn\_1545|Strength:0.001055513

GCGTGTTCGTTTTAGTGAGGATCCTTACCGCTATGGGTAAGATTGTTGTCTGCACCTCACATGTAGGCG  
GAAAAAGAAGAGGTCTTGTCTCTCTGCCGACAGTGGTCCCAAAATGCTGATCTTGCTGCTTCCAGCC  
ACTTGTGTGGGCTCACTGCTAGGAGGACCGTTATGACCCCGCCGATGACGCGGGACCAATTAGGTTG  
TCTGCACCTCACATGTGTGGGAGCCACCACAGTTTTCAACAAGCCCAATTAGGTTGTCTGCACCTCA  
CTGGTGGAGCACGACAACCGATGCTGATCCTATATAAGGTTTTGCTATTTCATTGAAAGCAGTAGTGAC  
TGATTTGTATATA

>MinSyn\_1842|Strength:0.001056306

GCGTGTTCGTTTTAGTGAGGCAGTGGTCCCTCCACTAGGAGGACCGATGCTGATCTGCACACCAGCATG  
TGTTGATCACCAGCTTACTTGTGTACAGGGCTCCTATATAAGGTTTTGCTATTTCATTGAAAGCAGTAG  
TGACTGATTTGTATATA

>MinSyn\_1679|Strength:0.001056359

GCGTGTTCGTTTTAGTGAGGAAGATTGATGAAAAGTCAAAAACAAAAATCAATTATATCAGCTTAGCAA  
GACCTCTAGCAAGTGGATTATCAGCTTAGCAAGACTTATGACCCCGCCGATGACGCGGGATGTACAG  
GGCTCACAACCATTATTGCGCTCACTGCTAGGAGGACCGATGCTCACTATCAGCGGAATTGCGATAAAG  
GAAAGGCTATGCCCAATTAGGTTGTCTGCCTATATAAGGTTTTGCTATTTCATTGAAAGCAGTAGTGAC  
TGATTTGTATATA

>MinSyn\_1902|Strength:0.001056813  
GCGTGTGTTTTAGTGAGGAGGTGGCTCCTACGACCACTATGCCCAATTAGGATCCTTACCGCTATGG  
GTAAGATTGCTGATCTTGCCTGCCAGCCACTTGTGTGACCTCTACAAAAGTGGTACTTGTGGGAGCCA  
CCATTGATGATTGGTGGAGCAGACAAGCAAGACCTCTACACTATATAAGGTTTTGCTATTCATTGAA  
AGCAGTAGTACTGATTTGTATATA

>MinSyn\_1568|Strength:0.001058797  
GCGTGTGTTTTAGTGAGGTGAAGATAAGATAATAATGTTGAAGATAAGATTGTCTGCACCAATATT  
TCTTGTCTACAAAAGTGGTACTTGTGTACAAAAAATGTCAAAGATACTCACATGTAGGCTATCAGCTT  
AGCAAAAAGATTGATGAAAAGTCAAAAACAAAAATCAATTATGTCTGCACCTCACATGTAGGCTATCAG  
CTTATCGAAAGGACAGTATGCCCAATTAGGTTGTCTGCACCTCACATCACTATCAGCGCTATATAAGG  
TTTTGCTATTCATTGAAAGCAGTAGTACTGATTTGTATATA

>MinSyn\_1315|Strength:0.001061578  
GCGTGTGTTTTAGTGAGGTCAGAAGATCAAAGGGCTAACATGTAGGCTATCAGCTTAGCAAGATGAA  
GCATCTTCCGGCTCACTGCTAGGAGGACCGATAGCAAGTGGATTACTTGTGTACAGGGCTCACTGCTA  
AACCACGTCTACAATGATCTTGCCTGCCTTGATAACCATTATTGCGATGATTATGACCCCCGCCGATG  
ACGCGGGAACAACAAATATTTCTTGTGGTACGACCACTATGCCTCTCTCTGCCGACAGTGGTCCCAA  
AGTGTACAGGGCTCACTGCTAGGAGGCTATATAAGGTTTTGCTATTCATTGAAAGCAGTAGTACTGA  
TTTGTATATA

>MinSyn\_1198|Strength:0.001062643  
GCGTGTGTTTTAGTGAGGTTTTCAACAAGATAGGTGGCTCCTACGTAGGCTATCAGCTTAGCAAGAC  
CTCTCAGTGGTCCCTCCACCTATCAGCTTCACTATCAGCATTCTATATAAGGTTTTGCTATTCATTGA  
AAGCAGTAGTACTGATTTGTATATA

>MinSyn\_1218|Strength:0.001063852  
GCGTGTGTTTTAGTGAGGTTATGACCCCCGCCGATGACGCGGGAGCTTAGCAAGACCTCTACAAAAC  
AGCAAGTGGATGACCACTCACTATCAGCGTGTTTTTCAACAAGTCTCTCTGCCGACAGTGGTCCC  
AAATGTCTGCACCTCACATGTAGGCTATCAGATCGAAAGGACAGTAACATGTAGGCTATAACCATTAT  
TGCGACCTCTACAAAAGTCTATATAAGGTTTTGCTATTCATTGAAAGCAGTAGTACTGATTTGTAT  
ATA

>MinSyn\_1052|Strength:0.001064499  
GCGTGTGTTTTAGTGAGGTTATGACCCCCGCCGATGACGCGGGAGCTATCAGCTTAGCAAGAACCAT  
TATTGCGATCTTGCCTGAGCAAGTGGATCTAGGAGGACCGATGCTGATCTTCTCTCTGCCGACAGTGG  
TCCCAAATACAGGGCTCACTGCTAGGAGGTGAAGCATCTTCCCTTGCCTGCCTTATTGCGATAAAGGA  
AAGGCACCTCACCTATATAAGGTTTTGCTATTCATTGAAAGCAGTAGTACTGATTTGTATATA

>MinSyn\_1257|Strength:0.001064875  
GCGTGTGTTTTAGTGAGGATGAGCTAAGCACATACGTCAGACTGGTACTTGTGTACAGGCTTTGTCA  
AAAGCTAAAAAAGATGATGCAAAGTGGTACAAAATGTCAAAGATACTTGTGTACAGTCCATCAACAA  
ATAATCCAAGTAAGTACAAAAGTGGTACTTGTGTACAGGGCTCAGCAAGTGGATTAGCTTAGCAATC  
CTTACCGCTATGGGTAAGATTCCAATAACCACGTCTACAATGGTACTTGTGTACTCAGAAGATCAAAG  
GGCTAGGGCTCACTGCAACCATTATTGCGAGGAGGACCGACTATATAAGGTTTTGCTATTCATTGAA  
GCAGTAGTACTGATTTGTATATA

>MinSyn\_1594|Strength:0.001064948  
GCGTGTGTTTTAGTGAGGTGGTGGAGCAGCACTGCTAGGAGGACCGATGCTGATCTTGCCTAATT  
TCGGGAAACCTCCTCGGTAGGTCACGACCACTATGCCCAATTAATCCTTACCGCTATGGGTAAGATTT  
TAGGTTGTCTGCACCTCACATGTATCGAAAGGACAGTAGATCTTGCAGGTGGCTCCTACTTAGGTTGT  
AACCACGTCTACAAGGAGGACCGATGCTGATCTATATAAGGTTTTGCTATTCATTGAAAGCAGTAGTG  
ACTGATTTGTATATA

>MinSyn\_1116|Strength:0.001065382  
GCGTGTGTTTTAGTGAGGAAAAATGTCAAAGATACACCTCACATGTAGGCTGTGGGAGCCACCAGTT  
GTCTGCACCTCACATGTAAGGTGGCTCCTACCTGGTACTTGTGTACAGGGCTCACTGCTAGGAAAAAG  
AAGAGGTATGCTGATCTTGCCAACCATTATTGCGCTATCACTATCAGCTGCTAGGAGGACCGATGCTG  
ATCTTGCCTCAGCCACTTGTGTGCAAATTCGGGAAACCTCCTCGAGCAAGACCTCTACAACCTATATA  
AGGTTTTGCTATTCATTGAAAGCAGTAGTACTGATTTGTATATA

>MinSyn\_1446|Strength:0.0010654  
GCGTGTGTTTTAGTGAGGTTATGACCCCCGCCGATGACGCGGGACCAATTAGGTTGTCTGATCCTTA

CCGCTATGGGTAAGATTTATGCCTCACTATCAGCTCACATGTAGGCTATCAGGTGGCTCCTACGTAGC  
AAGTGGATTTTTCAACAAGGTAGGTCACGACCACTATCTATATAAGGTTTTGCTATTCATTGAAAGC  
AGTAGTGACTGATTTGTATATA

>MinSyn\_1702|Strength:0.001068182

GCGTGTGTTTTAGTGAGGCAGTGGTCCCTCCACGGGCTCACTGCTAGGAGGACCGATGCTGATGTGG  
GAGCCACCAGCGCTATATAAGGTTTTGCTATTCATTGAAAGCAGTAGTGACTGATTTGTATATA

>MinSyn\_1140|Strength:0.001070521

GCGTGTGTTTTAGTGAGGTCAGAAGATCAAAGGGCTACCTCTACAAAAGTGGTCACTGGTCCCTCCA  
CTGTAGGCTATCATCTCTCTGCCGACAGTGGTCCCAAACCACTATGCCCAATTAGGATCCTTACCGC  
TATGGGTAAGATTTGAAAAAATGTCAAAGATAGCTAGGAGGCTTTGTCAAAGCTAAAAAAGATGATG  
CTAGGCAGCAAGTGGATGAGGACTCCATCAACAATAATCCAAGTAAGTGTCTATATAAGGTTTTGCT  
ATTCATTGAAAGCAGTAGTGACTGATTTGTATATA

>MinSyn\_1678|Strength:0.001070648

GCGTGTGTTTTAGTGAGGCAGTGGTCCCTCCACTTAGGTTGTCTGCAGGAAAAAGAAGAGGTTCTGC  
ACCTCACATGAATTTTCGGGAAACCTCCTCGCCGATGCTGATCTTGTGAAGCATCTTCTCTACAGCTT  
TGTCAAAAGCTAAAAAAGATGATGCAGGCTATCAGCTTAGCAAGACCTCTACTTATGACCCCCGCCGA  
TGACGCGGGACTATGCCCAATTAGGTTGTCTGTCTCTCTGCCGACAGTGGTCCCAAAGTGGTGGG  
ACCGATGCTTCAGAAGATCAAAGGGCTAACTATGCCCAATTAGGTTGTCTGCGCACACCAGCATGTGT  
TGATCACCAGCTGTAGGTCACGACCTATATAAGGTTTTGCTATTCATTGAAAGCAGTAGTGACTGATT  
TGTATATA

>MinSyn\_1113|Strength:0.00107331

GCGTGTGTTTTAGTGAGGAAAAATGTCAAAGATATCACTGCTAGGAGGACCGATGCTGAAACCACGT  
CTACAATACAGGGCTTCTCTCTGCCGACAGTGGTCCCAAAGTACAAAAGTGGTACTTGTGTACAGGGC  
TCCAGCCACTTGTGTGACTTGTGTACAGGGCTCACTGCAAATATTTCTTGTAAAGACCTCTACAAAAT  
CCATCAACAATAATCCAAGTAAGTCACTGCTAGGAGGACCGAGGTGGCTCCTACGTTGTCTGCACCT  
CACATGAATTTTCGGGAAACCTCCTCGGCAAGACCTCTACAAAAGTATATAAGGTTTTGCTATTCATTG  
AAAGCAGTAGTGACTGATTTGTATATA

>MinSyn\_1022|Strength:0.001074265

GCGTGTGTTTTAGTGAGGAACCATTATTGCGATCAGCTTAGCAAGACCTCTACAATTATGACCCCCG  
CCGATGACGCGGGACTTAGCTTTGTCAAAGCTAAAAAAGATGATGCGGTCCAAATATTTCTTGTGT  
GTACATCTCTCTGCCGACAGTGGTCCCAAACATGTAGGCTATCAGCTTAGCAACTATATAAGGTTTTG  
CTATTCATTGAAAGCAGTAGTGACTGATTTGTATATA

>MinSyn\_1616|Strength:0.001074662

GCGTGTGTTTTAGTGAGGGCACACCAGCATGTGTTGATCACCAGCTCCTCTACAAAATTTTCAACAA  
CTTGCCTGCCTTGATGATAAACACAGTCTACAAGCCAATTAGGTTCTATATAAGGTTTTGCTATTC  
TTGAAAGCAGTAGTGACTGATTTGTATATA

>MinSyn\_1429|Strength:0.001077025

GCGTGTGTTTTAGTGAGGTGAAGATAAGATAATAATGTTGAAGATAAGAGCTCACTGCTAGGAGGAC  
CGATGCTGATCTAACACAGTCTACAATGGGAAAAAGAAGAGGTTAGCAAGACCTCTACAAAAGTGGT  
TATATAAGGTTTTGCTATTCATTGAAAGCAGTAGTGACTGATTTGTATATA

>MinSyn\_1094|Strength:0.001078509

GCGTGTGTTTTAGTGAGGAATTTTCGGGAAACCTCCTCGTGCTGATCTTGTCTTATGACCCCCGCCGAT  
GACGCGGGACCTCACATGTAGGCTATCAGCTTACTATATAAGGTTTTGCTATTCATTGAAAGCAGTAG  
TGACTGATTTGTATATA

>MinSyn\_1160|Strength:0.001078689

GCGTGTGTTTTAGTGAGGATCGAAAGGACAGTATCTACTCACTATCAGCAAAGTGGTACTTGTGTAC  
AGCTATATAAGGTTTTGCTATTCATTGAAAGCAGTAGTGACTGATTTGTATATA

>MinSyn\_1629|Strength:0.001079957

GCGTGTGTTTTAGTGAGGTCTCTCTGCCGACAGTGGTCCCAAAGTCTCAAATATTTCTTGTACAGG  
GCTCACTGGGAAAAAGAAGAGGTTACAAAAGTGGTACAGCCACTTGTGTTGTCTGCACCTATCCTTAC  
CGCTATGGGTAAGATTTAGGTTGTCTGTTTTCAACAATAATTTTCGGGAAACCTCCTCGGACCTCTACA  
AAACTGGTACTTGTGTCACTGGTCCCTCCACACCTCTACAAAAGTGGTACTTGTGTACAGCTATATAA  
GGTTTTGCTATTCATTGAAAGCAGTAGTGACTGATTTGTATATA

>MinSyn\_1793|Strength:0.001084549

GCGTGTCTGTTTTAGTGAGGAACCATTATTGCGTCACTGCTAGGAGGACCGATGCTGATCTTGTTTTCA  
ACAATGCCCAATTAGGTTGTCTCTCTGCGGACAGTGGTCCCAAACCTATCAGCTTCTATATAAGGTT  
TTGCTATTCATTGAAAGCAGTAGTGACTGATTTGTATATA

>MinSyn\_1938|Strength:0.001084615

GCGTGTCTGTTTTAGTGAGGGGAAAAGAAGAGGTAGGCTAACCAATTATTGCGTCTACAAAACCTGGTAC  
TTGTGTACAGCTATATAAGGTTTTGCTATTCATTGAAAGCAGTAGTGACTGATTTGTATATA

>MinSyn\_1919|Strength:0.001085472

GCGTGTCTGTTTTAGTGAGGATCGAAAGGACAGTAGCTAGGAGGACCGATGCTGTTATGACCCCCGCCG  
ATGACGCGGGAGACAAATATTTCTTGATGTAGGCTATCAGCTTAGCAAGAAGCAAGTGGATTGATCT  
TGTGAAGCATCTCCAGGTTGTCTGCACCTCACATGTAGGCTCCATCAACAAATAATCCAAGTAAGCA  
AACTATATAAGGTTTTGCTATTCATTGAAAGCAGTAGTGACTGATTTGTATATA

>MinSyn\_1720|Strength:0.001089835

GCGTGTCTGTTTTAGTGAGTTTTCAACAACCTGGTACTTGTGTATCGAAAGGACAGTATAGGTCACGAC  
CGTTTTGTCAAAGCTAAAAAGATGATGCATTAGGTTGTCTGCACCTCACATGTAGGCTTGGTGGAG  
CACGACATCAATTGCGATAAAGGAAAGGGGCTCAAAAATGTCAAAGATACTGAAGATAAGATAATAA  
TGTTGAAGATAAGAGCACCTCACATGTAGGCTATCAAGCAAGTGGATGACTATATAAGGTTTTGCTAT  
TCATTGAAAGCAGTAGTGACTGATTTGTATATA

>MinSyn\_1505|Strength:0.001090518

GCGTGTCTGTTTTAGTGAGGAGGTGGCTCCTACTGCTAGGAGGACCGATGCTGATGAAGATAAGATAAT  
AATGTTGAAGATAAGAGCTGTCAGAAGATCAAAGGGCTAAAACCTGGTACTTGTGGGAAAAGAAGAGG  
TGTAGGCTATCAGCTTAGCAAGACCTTGAAGCATCTTCCTTGTGTACAGGGCTCACTGCTAGCAGCCA  
CTTGTGTACCACTCTATATAAGGTTTTGCTATTCATTGAAAGCAGTAGTGACTGATTTGTATATA

>MinSyn\_1695|Strength:0.001091509

GCGTGTCTGTTTTAGTGAGGCAGCCACTTGTGTCTGCTAAACCATTATTGCGTACAAAATCCTTACCGC  
TATGGTAAGATTCTGCACCTCACATGTTGGTGGAGCACGACAGCTAGGAGGACCGATGCATTGCGAT  
AAAGGAAAGGTCACATGTAGGCTATCAGCTTATGAAGCATCTCCAGGTCACGACCACAGGTGGCTCC  
TACAGGTCACGACCCTATATAAGGTTTTGCTATTCATTGAAAGCAGTAGTGACTGATTTGTATATA

>MinSyn\_1183|Strength:0.001092203

GCGTGTCTGTTTTAGTGAGGTCTCTCTGCGGACAGTGGTCCCAAACCTTGTGTACAGGGCTCACTGCTAG  
GAGAATTCGGGAAACCTCCTCGGGACCGATGCTATTGCGATAAAGGAAAGGATTAGGTTGTCTGCAC  
CTCACATGTGGTGGAGCACGACAATGTAGGCTATCAGCAAAAATGTCAAAGATATCTACAAAACCTGGT  
ACTTGTAGGTGGCTCCTACATGCCCAATTAGGTTGTCTGCACCTCTGAAGATAAGATAATAATGTTGA  
AGATAAGATACAGGGCTCACTGCTATATAAGGTTTTGCTATTCATTGAAAGCAGTAGTGACTGATTTG  
TATATA

>MinSyn\_1301|Strength:0.001093806

GCGTGTCTGTTTTAGTGAGGAACCACGTCTACAAGATCTTGCCTGCCTTATGAGCACACCAGCATGTG  
TTGATCACCAGCTTTAGGTTGTCTGCACTATATAAGGTTTTGCTATTCATTGAAAGCAGTAGTGACTG  
ATTTGTATATA

>MinSyn\_1435|Strength:0.001095891

GCGTGTCTGTTTTAGTGAGGTCCATCAACAAATAATCCAAGTAAGACAAAACCTGGTACTTGTGTACACA  
GCCACTTGTGTACGACCACTATGCCAATTAGGTTGTATCGAAAGGACAGTACCGATGCTGATCTTGC  
CTGCCATCCTTACCGCTATGGGTAAGATTACTGGTACTTGTGTACAGGGCAACCATTATTGCGATCA  
GCTTAGCAAGTGAAGATAAGATAATAATGTTGAAGATAAGAGCTAGGAGGACCGATGCTGATCTTGCC  
TTCATATCAGCCAAAACCTGGTACTTGTGTAGGTGGCTCCTACGCTCGCACACCAGCATGTGTTGATC  
ACCAGCTGCTTAGCAAGACCTCTACAAAACCTGGTACTCTATATAAGGTTTTGCTATTCATTGAAAGCA  
GTAGTGACTGATTTGTATATA

>MinSyn\_1654|Strength:0.00109866

GCGTGTCTGTTTTAGTGAGGGGAAAAGAAGAGGTTGTACAGGGCTCACTGCTAGGAGCAAGTGGATCA  
ATTGCACACCAGCATGTGTTGATCACCAGCTTGCCTAAGATTGATGAAAAGTCAAAAACAAAATC  
AATTATGGCTCACTGCTAGGAGGACCGATGCTGTTTTCAACAAGACCTCTACAAAACCTGGTACTTGTG  
AGGTGGCTCCTACCGCGCTATATAAGGTTTTGCTATTCATTGAAAGCAGTAGTGACTGATTTGTATA  
TA

>MinSyn\_1125|Strength:0.001099116

GCGTGTCTGTTTTAGTGAGGTCTCTCTGCGGACAGTGGTCCCAAACACGACCACTATGCCCAATTATCC



TTACCGCTATGGGTAAGATTTCTGCACCTCACATGTAGGCTATCAGATCGAAAGGACAGTAACTTGTG  
TATTGCGATAAAGGAAAGGAGGGCTCACTGCTAGGAGGACCGCTATATAAGGTTTTGCTATTCATTGA  
AAGCAGTAGTACTGATTTGTATATA

>MinSyn\_1389|Strength:0.001100543

GCGTGTGTTTTAGTGAGGGGAAAAGAAGAGGTGGTACTTGTGTACAGGGAAAATGTCAAAGATAG  
CTGATCTTGCCTGCGCACACCAGCATGTGTTGATCACCAGCTGGTTGTCTGCACCTCACACTATATAA  
GTTTTGCTATTCATTGAAAGCAGTAGTACTGATTTGTATATA

>MinSyn\_1247|Strength:0.001100585

GCGTGTGTTTTAGTGAGGATCGAAAGGACAGTATGTGTACAGGGTCACTATCAGCTTGTGTACAGGG  
CTCACTGCTAGGATTTTCAACAACACATGTAGGCTATCATCCATCAACAAATAATCCAAGTAAGAGGG  
CTCACTGCTAGGAATTGCGATAAAGGAAAGGACAAAAGTGGTACTTGTGTACAGCTATATAAGGTTTT  
GCTATTCATTGAAAGCAGTAGTACTGATTTGTATATA

>MinSyn\_1615|Strength:0.001100901

GCGTGTGTTTTAGTGAGGTCATATCAGCGGTCACAACCATTATTGCGCACTGCTAGGCTATATAAG  
GTTTTGCTATTCATTGAAAGCAGTAGTACTGATTTGTATATA

>MinSyn\_1765|Strength:0.001101563

GCGTGTGTTTTAGTGAGGAACCATTATTGCGGACCGATGCTGATCTTGCCTGCCTTGACAGTGGTCC  
CTCCACTCCTATATAAGGTTTTGCTATTCATTGAAAGCAGTAGTACTGATTTGTATATA

>MinSyn\_1836|Strength:0.00110268

GCGTGTGTTTTAGTGAGGGGAAAAGAAGAGTCTGCACCTCACATGTAGGCTATCAGTGGTCCCTC  
CACTGCCATTGCGATAAAGGAAAGGGTAGGCTATCAGCTTAGCAAGACCCTATATAAGGTTTTGCTAT  
TCATTGAAAGCAGTAGTACTGATTTGTATATA

>MinSyn\_1453|Strength:0.001102726

GCGTGTGTTTTAGTGAGGAAAATGTCAAAGATATGTCTGCACCTCACATGGTGGAGCACGACAGGT  
AGGTCACGACCATCGAAAGGACAGTATGGTACTTGTGTACAGGGCTCACTGATCCTTACCCTATGGG  
TAAGATTCTATCGTTTTGTCAAAGCTAAAAAGATGATGCAACTGGTACTTGTGTACAGGGCTCAAC  
CAGTCTACAAGGGCTGCACACCAGCATGTGTTGATCACCAGCTGCCTATATAAGGTTTTGCTATTC  
TTGAAAGCAGTAGTACTGATTTGTATATA

>MinSyn\_1099|Strength:0.001102732

GCGTGTGTTTTAGTGAGGAACCATTATTGCGTATGCCAATTAGGTTGTCTGCACCTCTCACTATCA  
GCTAGGTCACGACCACATCGAAAGGACAGTAACAAATATTTCTTGTGTAATCCATCAACAAATAATCC  
AAGTAAGGCTCACTGCTAGGAGGAATCCTTACCGCTATGGGTAAGATTTGCTGATCTTGAAGCAAGTGG  
ATTAGGAGGACCGATGCTGGCACACCAGCATGTGTTGATCACCAGCTACTTGTGTACAGGGCTCACTG  
CCTATATAAGGTTTTGCTATTCATTGAAAGCAGTAGTACTGATTTGTATATA

>MinSyn\_1528|Strength:0.001103357

GCGTGTGTTTTAGTGAGGTCTCTCTGCCGACAGTGGTCCCAAACCTCACATGTAGGCTATCAGCTT  
ATCCTTACCCTATGGGTAAGATTCACGATTATGACCCCGCCGATGACGCGGGAGTACAGGGCTCAC  
TGCTAGGAGGATCAGAAGATCAAAGGGCTACTCACATGTAGGCTATCCATCAACAAATAATCCAAGTA  
AGTCTGCACCTCACATGTAGGCTATCAGCTTCACTGGTCCCTCCACAGGCTATCAGCTTAGCAAGACC  
TTGAAGATAAGATAATAATGTTGAAGATAAGAATCAGCTTAGCAAGACCTCTACAAAAGTCTATATA  
AGGTTTTGCTATTCATTGAAAGCAGTAGTACTGATTTGTATATA

>MinSyn\_1005|Strength:0.00110521

GCGTGTGTTTTAGTGAGGTGAAGATAAGATAATAATGTTGAAGATAAGACTTGTGTACAGGGCATCC  
TTACCGCTATGGGTAAGATTACCACTATGCCAATTAGGTTGTCTGCTATATAAGGTTTTGCTATTC  
TTGAAAGCAGTAGTACTGATTTGTATATA

>MinSyn\_1646|Strength:0.001105393

GCGTGTGTTTTAGTGAGGAATTTCCGGAAACCTCCTCGACTTGTGTACAGGGCTCACTGCTAGAACC  
ACGCTACAATCTACAGGTGGCTCCTACTATGCCAATTAGGTTGTCTGTCAGAAGATCAAAGGGCTA  
GTAGGCTATCAGCTTAGCAAGACCCAAATATTTCTTGTCTGCACCAGCAAGTGGATACTCCATCAACA  
AATAATCCAAGTAAGAAAAGTGGTACTTGTGTACAGGGCTCTCTCTGCCGACAGTGGTCCCAAAGA  
CCACTATGCCAATAAAAATGTCAAAGATAGTTGTCTGCACCTCACATGCTATATAAGGTTTTGCTAT  
TCATTGAAAGCAGTAGTACTGATTTGTATATA

>MinSyn\_1728|Strength:0.001105791

GCGTGTGTTTTAGTGAGGTCTCTCTGCCGACAGTGGTCCCAAACCAATTAGGTTGTCTGCACCTCAT

CCTTACCGCTATGGGTAAGATTCCAGCCACTTGTGTTTTGTCTGCACTGAAGATAAGATAATAATGTTG  
AAGATAAGATTAGGTTGTCTGCACCTCACATGTAGGCATCGAAAGGACAGTACTAGGAGGACCGATGC  
TGATCCTATATAAGGTTTTGCTATTCATTGAAAGCAGTAGTGACTGATTTGTATATA

>MinSyn\_1766|Strength:0.001105882

GCGTGTTCGTTTTAGTGAGGTGAAGCATCTCCGCTGATCTTGGTGGGAGCCACCATCACTGCTAGGAC  
TATATAAGGTTTTGCTATTCATTGAAAGCAGTAGTGACTGATTTGTATATA

>MinSyn\_1251|Strength:0.00110594

GCGTGTTCGTTTTAGTGAGGATGAGCTAAGCACATACGTCAGTCTTGCCAACCATTATTGCGTTGAAGA  
TAAGATAATAATGTTGAAGATAAGAAGCAAGACCTCTACAAAACCTGGTACTGGTGGAGCACGACACTC  
ACTGCTAGGAGGACCGATGCTGATCAGGTGGCTCCTACAAGACCTCTACAAAACCTGGTACTTGTGTAT  
CGAAAGGACAGTAAGGCTATCACAGTGGTCCCTCCACTACAAGCTTTGTCAAAGCTAAAAAAGATGA  
TGCAATTAGGTTGTCTGCACCTCACACTATATAAGGTTTTGCTATTCATTGAAAGCAGTAGTGACTGA  
TTTGTATATA

>MinSyn\_1136|Strength:0.00110793

GCGTGTTCGTTTTAGTGAGGAAAATGTCAAAGATAAATTAGGTTGTCTGCACCTCACATGTCAGCCAC  
TTGTGTCCAATTAGGTTATCGAAAGGACAGTATTAGCAAGACCTCTACATGGTGGAGCACGACAGCCC  
TATATAAGGTTTTGCTATTCATTGAAAGCAGTAGTGACTGATTTGTATATA

>MinSyn\_1386|Strength:0.001109961

GCGTGTTCGTTTTAGTGAGGCAGCCACTTGTGTATTAGGTGGGAGCCACCACACGACCACTATGCCCA  
GTGGTCCCTCCACGTGTACAGGGCTCACTATATAAGGTTTTGCTATTCATTGAAAGCAGTAGTGACTG  
ATTTGTATATA

>MinSyn\_1993|Strength:0.001111612

GCGTGTTCGTTTTAGTGAGGCAAATATTTCTTGTAACCTGGTACTTGTGTACAGGGCTAAAAATGTCA  
AAGATAGCCTTGATGAACCATTATTGCGGGCTCTATATAAGGTTTTGCTATTCATTGAAAGCAGTAGT  
GACTGATTTGTATATA

>MinSyn\_1794|Strength:0.001113158

GCGTGTTCGTTTTAGTGAGGGCTTTGTCAAAGCTAAAAAGATGATGCACAACCACGTCTACAACAGG  
GCTCACTGCTAGGAGGACCGATGCTGGTGGGAGCCACCCTTAGCATGAAGCATCTTCCAAGACCTAG  
GTGGCTCCTACGTACACTATATAAGGTTTTGCTATTCATTGAAAGCAGTAGTGACTGATTTGTATATA

>MinSyn\_1033|Strength:0.001114038

GCGTGTTCGTTTTAGTGAGGTGGTGGAGCACGACATGTCTGCACCTCACATGTAGGCAAAAATGTCAA  
GATATTGTGTACAGGGCTCTCACTATCAGCTAAAGATTGATGAAAAGTCAAAAACAAAATCAATTAT  
GTAGGTCACGACCACTATGCCCAATTAATTTCCGGAAACCTCCTCGATTAGGTTGTGAAGCATCTTC  
CGCCCAATTAGGTTGTCAGCCACTTGTGTCTTGTGTACAGGGCTCACTGCTAGGAGGACGGAAAAAGA  
AGAGGTGGAGGACCGATCTATATAAGGTTTTGCTATTCATTGAAAGCAGTAGTGACTGATTTGTATAT  
A

>MinSyn\_1393|Strength:0.001114074

GCGTGTTCGTTTTAGTGAGGTCCATCAACAAATAATCCAAGTAAGGTTGTCTGCACCTCACATGGTGA  
GCACGACAAGGCTATCAGCTTAGCATCACTATCAGCTAGCAACTATATAAGGTTTTGCTATTCATTGA  
AAGCAGTAGTGACTGATTTGTATATA

>MinSyn\_1829|Strength:0.001115254

GCGTGTTCGTTTTAGTGAGGTGAAGCATCTCCAGGAGGTGGCTCCTACAGGCTATCAGCTTAGCAACT  
ATATAAGGTTTTGCTATTCATTGAAAGCAGTAGTGACTGATTTGTATATA

>MinSyn\_1417|Strength:0.001115557

GCGTGTTCGTTTTAGTGAGGAAAATGTCAAAGATATAGGTTGTCTGCACCTGGTGGAGCACGACAGA  
CCACTATGCCCAATTAGGTTGTCTGTCTCTGCCGACAGTGGTCCCAAATATGCCCAATTAGGTTAA  
CCATTATTGCGCACCTCACATGTACTATATAAGGTTTTGCTATTCATTGAAAGCAGTAGTGACTGATT  
TGTATATA

>MinSyn\_1030|Strength:0.001118412

GCGTGTTCGTTTTAGTGAGGTTATGACCCCCGCGGATGACGCGGGACTGCACCTCAGCAAGTGGATATC  
AGAAGATCAAAGGGCTAACAAAACCTGGTACAGGTGGCTCCTACGCCAATTAATTTCCGGAAACCTC  
CTCGTCTACAAAACCTGGTACTTGTGTACAGGGCTATATAAGGTTTTGCTATTCATTGAAAGCAGTAGT  
GACTGATTTGTATATA

>MinSyn\_1197|Strength:0.001118766

GCGTGTCTGTTTTAGTGAGGTGGTGGAGCACGACAGCCCAATTAGGTTGTCTGCACCTCACAGCACACC  
AGCATGTGTTGATCACCAGCTGGTCACTATCAGCCCGATGCTGATCTTGCTGCCAGTGGTCCCTCCA  
CGTAGGCTATCAGCTTCTATATAAGGTTTTGCTATTCATTGAAAGCAGTAGTGACTGATTTGTATATA  
>MinSyn\_1535|Strength:0.001119058

GCGTGTCTGTTTTAGTGAGGAGGTGGCTCTACTCTACAAAAGCTTTTGTCAAAGCTAAAAAAGATG  
ATGCGGTTGTCTGCACCTCACGCACACCAGCATGTGTTGATCACCAGCTACCTCTACTCTCTGCGG  
ACAGTGGTCCCAAACCTCATCACTATCAGCTGCTGGAAAAAGAAGAGGTCCTTGATGATCAGAAGATCA  
AAGGGCTACCCAATTAGGTTGTCTGCACCTCAATTTGGGAAACCTCCTCGGCTATCAGCTTAGCAAG  
ACCTCTACAATTATGACCCCGCCGATGACGCGGGATAGGCTATCAGCTTAGCAAGACCTCTACAAC  
ATATAAGGTTTTGCTATTCATTGAAAGCAGTAGTGACTGATTTGTATATA

>MinSyn\_1638|Strength:0.001120774

GCGTGTCTGTTTTAGTGAGGTCAGAAGATCAAAGGGCTAAGCAAGACCTCTACAAAATAACCACGTCT  
ACAAC TAGGAGGACCGATGCTGATCTTGCTGCCAAAAATGTCAAAGATAACTGAAGATAAGATAATA  
ATGTTGAAGATAAGATCAGCTTAGCAAGAGCTTTGTCAAAGCTAAAAAAGATGATGACTGGTACTT  
GTGTACAGGGCTCACTGATCGAAAGGACAGTAGGTAAGTGTGTACAGGGCTCCAGTGGTCCCTCCACA  
CTGCTAGGAGGACCGATGCTGATCTTAAGATTGATGAAAAGTCAAAAACAAAAATCAATTATGTAGGT  
CAATCCTTACCGCTATGGGTAAGATTGACCTCTACAAAAGTGGTACTTGCTATATAAGGTTTTGCTAT  
TCATTGAAAGCAGTAGTGACTGATTTGTATATA

>MinSyn\_1713|Strength:0.001122618

GCGTGTCTGTTTTAGTGAGGTCTCTGCGGACAGTGGTCCCAAACCAATTAGGTTGTCTGCACCTCAC  
ATGTAGTCACTATCAGCTGTAGGCTAATCGAAAGGACAGTAGCACCTCACATGCACACCAGCATGTGT  
TGATCACCAGCTTACATGTAGGCTATCAGCTTAGCCAGCCACTTGTGTGTCTGCACCTCACATGTAG  
GCTATCAGCTTGGTGGAGCACGACAATCTTGCCATTGCGATAAAGGAAAGGCTTGCTGCCTATATA  
AGGTTTTGCTATTCATTGAAAGCAGTAGTGACTGATTTGTATATA

>MinSyn\_1041|Strength:0.001123009

GCGTGTCTGTTTTAGTGAGGTGGTGGAGCACGACAGTGGTCAACCAATTAGGTTGTCTGCACCTCAC  
AGGTTTTGCTATTCATTGAAAGCAGTAGTGACTGATTTGTATATA

>MinSyn\_1355|Strength:0.001123894

GCGTGTCTGTTTTAGTGAGGAAGATTGATGAAAAGTCAAAAACAAAAATCAATTATTAATAATGTCAA  
GATAGTACGACCACTATGCCCAATTAGGTTGGTGGAGCACGACATAGGCTATCAGCTTTCAGAAGAT  
CAAAGGGCTAATCAAAATTTCTTGTCTACAAAAGTGGTACTCACTATCAGCATGCTGATCTTGCT  
GTGAAGCATCTTCTTAGGTTGTCTGCACCTCACACTATATAAGGTTTTGCTATTCATTGAAAGCAGT  
AGTGACTGATTTGTATATA

>MinSyn\_1847|Strength:0.001124128

GCGTGTCTGTTTTAGTGAGGATTGCGATAAAGGAAAGGGCAAGACCTCTAATCCTTACCGCTATGGGTA  
AGATTGTGTACAGGGCTCACTGCTAGGAGGTCTCTGCGGACAGTGGTCCCAAAGCCTTGATGATAC  
TATATAAGGTTTTGCTATTCATTGAAAGCAGTAGTGACTGATTTGTATATA

>MinSyn\_1079|Strength:0.001125086

GCGTGTCTGTTTTAGTGAGGTCACTATCAGCCTCTACAAAAGTGGTACTTGTGTACATCCATCAACAA  
TAATCCAAGTAAGGACCGATGCTGATCTTAATTTGGGAAACCTCCTCGGACCCAGTGGTCCCTCCAC  
AAAAGTGGTACTTGTGTACAGGGCTCACTCTATATAAGGTTTTGCTATTCATTGAAAGCAGTAGTGAC  
TGATTTGTATATA

>MinSyn\_1542|Strength:0.001127273

GCGTGTCTGTTTTAGTGAGGATCGAAAGGACAGTACCTTCTCTGCGGACAGTGGTCCCAAATGTCTG  
CACCTCACAAATTGCGATAAAGGAAAGGGGTCACGACCACTATGCCCAATTAGGTTGTGAAGCATCTC  
CGCATCAGAAGATCAAAGGGCTATAGGTTGTCTGCACCTCACATGCTATATAAGGTTTTGCTATTCAT  
TGAAAGCAGTAGTGACTGATTTGTATATA

>MinSyn\_1361|Strength:0.001128668

GCGTGTCTGTTTTAGTGAGGATCCTTACCGCTATGGGTAAGATTGTGTACAGCAGCCACTTGTGTAGGA  
GGACCGATGCTAACCACGTCTACAAATTAGGTTGTCTGCACCAAGTGGTCCCTCCACTACAGGGCTCAC  
TCTATATAAGGTTTTGCTATTCATTGAAAGCAGTAGTGACTGATTTGTATATA

>MinSyn\_1709|Strength:0.001130137

GCGTGTCTGTTTTAGTGAGGATTGCGATAAAGGAAAGGGTAGGTCACGACCACTATGCCAGCTTTGTC  
AAAAGCTAAAAAAGATGATGCGCAAGACCTCTCAGTGGTCCCTCCACTGGTACTTGTGTACAGGGCAG

GTGGCTCCTACGCAAGACCTCTACAATGAAGATAAGATAATAATGTTGAAGATAAGATTAGGTTGTCT  
GCACCTCACATGTTTCAAGATCAAAGGGCTAGTGTACACTATATAAGGTTTTGCTATTCATTGAAAG  
CAGTAGTACTGATTTGTATATA

>MinSyn\_1814|Strength:0.001130228

GCGTGTTCGTTTTAGTGAGGTTATGACCCCGCCGATGACGCGGGAAGGTCACGACCACTATGCAACCA  
CGTCTACAATAGGTTGTCTGAAGATAAGATAATAATGTTGAAGATAAGATGCTGATCTTGCCTGCCTT  
GATGAATCCTTACCCTATGGGTAAGATTGTCTGCACCTCACATGTAGGCTATCAGCTCAAATATTTT  
TTGTCAGCTTAGCAAGACCTCTACAAATGAAGCATCTTCCAGGTTGTCTGCACCTCAATTTTCGGGAAA  
CCTCCTCGCTCTACAAAGGTGGCTCCTACTTGTCTGCACCTCACTATATAAGGTTTTGCTATTCATTG  
AAAGCAGTAGTACTGATTTGTATATA

>MinSyn\_1726|Strength:0.001131373

GCGTGTTCGTTTTAGTGAGGTTTTCAACAAGACCACTATGCCCAATTAGATCCTTACCCTATGGGTAA  
GATTATGTAGGCTATCAGCTTAGCAAAGATTGATGAAAAGTCAAAAACAAAATCAATTATGCCTTGA  
TGATATCTCTCTGCCGACAGTGGTCCCAAAGTGTACAGGGCTCACTGCTAGGAGGACCTCAGAAGATC  
AAAGGGCTACTGGTACTTGTGTGAAAAAGAAGAGGTGGTACGACCACTATGCCCAATTAGGTTGCT  
ATATAAGGTTTTGCTATTCATTGAAAGCAGTAGTACTGATTTGTATATA

>MinSyn\_1999|Strength:0.001133957

GCGTGTTCGTTTTAGTGAGGTCAGTGGTCCCTCCACTCACTGCGCTTTGTCAAAGCTAAAAAGATGAT  
GCCGATGCTGATCTTGCCTGCCTTGTACTACTATCAGCCCGATGCTGATCTTGCCTGCCTTAATTTTCGG  
GAAACCTCCTCGAGATCCTTACCCTATGGGTAAGATTAGGCTATCAGCTCAGAAGATCAAAGGGCTA  
ACTATGCCCAATTAGGTTGCTATATAAGGTTTTGCTATTCATTGAAAGCAGTAGTACTGATTTGT  
ATATA

>MinSyn\_1305|Strength:0.001134023

GCGTGTTCGTTTTAGTGAGGTCCATCAACAATAATCCAAGTAAGGTACAGGGCTCACTGCTAGAACCA  
TTATTGCGCACTATGCCCAATTAGGTTGTCTGCACTTTTCAACAAGGAGGACCGATGCTGATCTTGGC  
ACACCAGCATGTGTTGATCACCAGCTTACTTGTGTACAGGGCTCACTGCAACCACGTCTACAACCTCAC  
ATGTTTATGACCCCGCCGATGACGCGGGACAAGACCTCTACCAGTGGTCCCTCCACTCAGCTTAGCA  
AGACCTCTACAAAACCTATATAAGGTTTTGCTATTCATTGAAAGCAGTAGTACTGATTTGTATATA

>MinSyn\_1060|Strength:0.001134681

GCGTGTTCGTTTTAGTGAGGAACCACGTCTACAACCTCTACAAAACCTGGTACTTGTGTACTTTTCAACA  
AGCCTGCCTTGATCAAATATTTCTTGTCTGGTACTTGTGTACAGGGCTCACTGCTATCTCTCTGCCGA  
CAGTGGTCCCAAAGCTCTATATAAGGTTTTGCTATTCATTGAAAGCAGTAGTACTGATTTGTATATA

>MinSyn\_1306|Strength:0.001137132

GCGTGTTCGTTTTAGTGAGGGTGGGAGCCACCACTGCTAGGAGGACCAATTTTCGGGAAACCTCCTCGCT  
ATCAGCATCGAAAGGACAGTACTCAGTGGTCCCTCCACGCTTAGCAAGACCTCTACAAAACCTGGTACT  
CTATATAAGGTTTTGCTATTCATTGAAAGCAGTAGTACTGATTTGTATATA

>MinSyn\_1156|Strength:0.001137203

GCGTGTTCGTTTTAGTGAGGGCTTTGTCAAAGCTAAAAAGATGATGCGCACCTCACATGTAGGCTAT  
CTCCATCAACAATAATCCAAGTAAGACTATGCCCAATTAGTTTTCAAGATCAAAGGGCTAAGGGC  
TCACTGCTAGGAGGACTCTCTCTGCCGACAGTGGTCCCAAATAGCAAGACCTCTACTATATAAGGTTT  
TGCTATTCATTGAAAGCAGTAGTACTGATTTGTATATA

>MinSyn\_1733|Strength:0.001140441

GCGTGTTCGTTTTAGTGAGGAAAAATGTCAAAGATAAGGTCACGACCACTATGCCCAATTAGGAAAAAG  
AAGAGTTGGTACTTGTCTATATAAGGTTTTGCTATTCATTGAAAGCAGTAGTACTGATTTGTATATA

>MinSyn\_1084|Strength:0.001142361

GCGTGTTCGTTTTAGTGAGGAATTTTCGGGAAACCTCCTCGCTTAGCAAGACCTCTACAAAAGGTGGCTC  
CTACAGGGCTCACTGCTAGGAGGACTATATAAGGTTTTGCTATTCATTGAAAGCAGTAGTACTGATT  
TGTATATA

>MinSyn\_1478|Strength:0.001142794

GCGTGTTCGTTTTAGTGAGGTTATGACCCCGCCGATGACGCGGGAGCACCTCACATGTAGGCTATCAG  
CTTAGCAGCCACTTGTGTCCTTGTGAAGCATCTTCCATGTACTATATAAGGTTTTGCTATTCATTGAA  
AGCAGTAGTACTGATTTGTATATA

>MinSyn\_1469|Strength:0.001142949

GCGTGTTCGTTTTAGTGAGGAAAAATGTCAAAGATATTGTCTGCACCTCACATGTATCAGAAGATCAA

GGGCTAGTCTGCACCTCAGCCACTTGTGTCTATCAGCTTAGCAAGACCTAGCAAGTGGATTGGTACTT  
GTGTACAGGGCTCCATCAACAAATAATCCAAGTAAGGCTCACTGCTAGGAGGACCGATGCTGATTCAC  
TATCAGCGCGGTAGGTCAATCCTTACCGCTATGGGTAAGATTGTACTTGTGTACAGGGCAAGATTGAT  
GAAAAGTCAAAAACAAAATCAATTATATCTTGCCTGCCTTGATCTATATAAGGTTTTGCTATTTCATT  
GAAAGCAGTAGTGACTGATTTGTATATA

>MinSyn\_1369|Strength:0.001144036

GCGTGTTCGTTTTAGTGAGGGGAAAAGAAGAGGTACGACCACTATGCCCAATTAGTCAGAAGATCAAA  
GGGCTATGCTAGGAGGACCGAAGATTGATGAAAAGTCAAAAACAAAATCAATTATGTGTACAGGGCT  
CACTGCTAGGAGGACCGACTATATAAGGTTTTGCTATTTCATTGAAAGCAGTAGTGACTGATTTGTATA  
TA

>MinSyn\_1813|Strength:0.001144756

GCGTGTTCGTTTTAGTGAGGATCGAAAGGACAGTATGCTAGGAGGACCGATGCTGATCTTATGACCCCC  
GCCGATGACGCGGAACTGGTACTTGTAAACCACGTCTACAATGTGGAAAAAGAAGAGGTGACCTCTAC  
AAAAGTGGTACTTGTCTATATAAGGTTTTGCTATTTCATTGAAAGCAGTAGTGACTGATTTGTATATA

>MinSyn\_1656|Strength:0.001145503

GCGTGTTCGTTTTAGTGAGGGGAAAAGAAGAGGTGATCTTGCCTGCCTCAGCCACTTGTGTTACTTGT  
TATGACCCCCGCCGATGACGCGGGACAAGACCTCTACAAATCTCTCTGCCGACAGTGGTCCCAAAGG  
GCTCACTGCTAGGAGGCAGTGGTCCCTCCACCGATGCTGATCTAGGTGGCTCCTACCAGGGCTCACTG  
CTAGGAGGACTATATAAGGTTTTGCTATTTCATTGAAAGCAGTAGTGACTGATTTGTATATA

>MinSyn\_1588|Strength:0.001145519

GCGTGTTCGTTTTAGTGAGGTCACTATCAGCACAAAAGTGGTAATCGAAAGGACAGTAGATGCTGGTGG  
AGCACGACAACCTTGTGTACTTATGACCCCCGCCGATGACGCGGGAGTCCATCAACAAATAATCCAAGT  
AAGTAGCAAGACCTCATTGCGATAAAGGAAAGGACCTGCTTTGTCAAAGCTAAAAAAGATGATGCTC  
TTGCAACCATTATTGCGGCAAGACCTCTACAAAACGTGGGAGCCACCAGCCTTGACTATATAAGGTTT  
TGCTATTTCATTGAAAGCAGTAGTGACTGATTTGTATATA

>MinSyn\_1090|Strength:0.001146956

GCGTGTTCGTTTTAGTGAGGAGGTGGCTCCTACCGGTAGGTCACGAATCCTTACCGCTATGGGTAAGAT  
TATGTAGGCTATCAGCTTAGCAAGACCTCAAAAATGTCAAAGATACAAGAGGAAAAAGAAGAGGTCCA  
AATATTTCTTGTACCGATGCTGATCTTGTAGCAAGTGGATGATCTTTTCAACAACATGTAGGCTAATCG  
AAAGGACAGTATCTACAAAAGTGGTACTTGTGTATGAAGATAAGATAATAATGTTGAAGATAAGAACT  
GCTAGGAGGACTATATAAGGTTTTGCTATTTCATTGAAAGCAGTAGTGACTGATTTGTATATA

>MinSyn\_1364|Strength:0.001150221

GCGTGTTCGTTTTAGTGAGGGTGGGAGCCACCAGACCACTATGCCCAATTAGGTTGTCTGCACAGCAAG  
TGGATCTGCCTTGATGATTGGTGGAGCACGACACAGCTTAGCAAGACCTCTACAAAAGTGGTAATTTT  
GGGAAACCTCCTCGGCTCACTGCTAGGAGGATCGAAAGGACAGTAGATTTTTCAACAATTGCCTATTG  
CGATAAAGGAAAGGCCAATTAGGTTCTATATAAGGTTTTGCTATTTCATTGAAAGCAGTAGTGACTGAT  
TTGTATATA

>MinSyn\_1838|Strength:0.001150521

GCGTGTTCGTTTTAGTGAGGTGAAGCATCTCCCTATCAGCTTAGCAAAGGTGGCTCCTACACTTGTGT  
ACAGGGCTCACTGCTAGGATCGAAAGGACAGTAGAGGACCGATGCTGATCTTGTCTCTCTGCCGACA  
GTGGTCCCAAATGCACCTCACATGTAGGCTATCAATCCTTACCGCTATGGGTAAGATTGACAAAAATG  
TCAAAGATACGGTAGGTCACGACCACTATGCCCTATATAAGGTTTTGCTATTTCATTGAAAGCAGTAGT  
GACTGATTTGTATATA

>MinSyn\_1350|Strength:0.001151157

GCGTGTTCGTTTTAGTGAGGTTATGACCCCCGCCGATGACGCGGGATAGGAGGACCGATGCTGATCTTC  
AGTGGTCCCTCCACATCAGCTTAGCAAGAAACCATTATTGCGCCTTCTATATAAGGTTTTGCTATTCA  
TTGAAAGCAGTAGTGACTGATTTGTATATA

>MinSyn\_1686|Strength:0.001152609

GCGTGTTCGTTTTAGTGAGGAGGTGGCTCCTACAGGTGGTGGAGCACGACAATGCCCAATTAGGTTGTC  
TGCTCACTATCAGCGTCTTGAAGATAAGATAATAATGTTGAAGATAAGAGCTCACTGCTAGGAGGAAT  
CCTTACCGCTATGGGTAAGATTCACGACCACTATGCAAATATTTCTTGTGTACAGGGCTTTTCAACA  
ATGTACAGGGCTCACTGCTAGGAGGACTATATAAGGTTTTGCTATTTCATTGAAAGCAGTAGTGACTGA  
TTTGTATATA

>MinSyn\_1100|Strength:0.001153486

GCGTGTCTGTTTTAGTGAGGTTTTCAACAAACCACTATGCATTGCGATAAAGGAAAGGGGAGGACCGAT  
GCTGATCTTGCTGCTTATGACCCCGCCGATGACGCGGGAAGGGCTCACTGCTAGGAGGACCGATCC  
ATCAACAAATAATCCAAGTAAGGTACTTGGAAAAAGAAGAGGTGATCTTGCCTGCCTTGATGATGAAG  
CATCTTCCACCACTATGCCCTATATAAGGTTTTGCTATTCATTGAAAGCAGTAGTGACTGATTTGTA  
TATA

>MinSyn\_1272|Strength:0.001153486

GCGTGTCTGTTTTAGTGAGGCAAATATTTCTTGTAGGCTATCAGGAAAAAGAAGAGGTCTCACTGCTAT  
CACTATCAGCGCCCAATTAGGTTGTCTGCACCTCATGGTGGAGCACGACAGCGGTAGGTCACGACCAC  
TATGCCCAATTATCCATCAACAAATAATCCAAGTAAGACTATATAAGGTTTTGCTATTCATTGAAAGC  
AGTAGTGACTGATTTGTATATA

>MinSyn\_1953|Strength:0.001154386

GCGTGTCTGTTTTAGTGAGGTGAAGATAAGATAATAATGTTGAAGATAAGAGCAGTGGTCCCTCCACCT  
GGTACTTGTGTACAGGGCTCTCACTATCAGCACCCTATGCCCAATTAGGTTGTCTCAAATATTTCTT  
GTCTCACTCAGAAGATCAAAGGGCTAGGGCTCACTGCTAGGAGGACCGATGCTGATTTATGACCCCG  
CCGATGACGCGGGACTATCAGCTTAGCAAGACCTCTACAAGGAAAAAGAAGAGGTTGCACCTCGTGGG  
AGCCACCATAGGTCTATATAAGGTTTTGCTATTCATTGAAAGCAGTAGTGACTGATTTGTATATA

>MinSyn\_1903|Strength:0.001157778

GCGTGTCTGTTTTAGTGAGGGCACACCAGCATGTGTTGATCACCAGCTATGTAGGCTATCAGCTAATTT  
CGGGAAACCTCCTCGGCTGATCTTGCCTGCCTTGATGAGGTGGCTCCTACTCTTGCCTGCCTTGCTAT  
ATAAGGTTTTGCTATTCATTGAAAGCAGTAGTGACTGATTTGTATATA

>MinSyn\_1437|Strength:0.001160473

GCGTGTCTGTTTTAGTGAGGTTATGACCCCGCCGATGACGCGGGATCGCGGTAGGTCATCGAAAGGAC  
AGTATGATCTTGCTGCCTTGAGTGGTCCCTCCACCGATGCTGATCTTGCCTGCCTTGATGATTGCG  
ATAAAGGAAAGGAAGTACTTGTGTACAGGGCTCTCTCTGCGGACAGTGGTCCCAAACAATA  
TTTCTTGTACTATGCCCAATTAGGTTGCCTATATAAGGTTTTGCTATTCATTGAAAGCAGTAGTGAC  
TGATTTGTATATA

>MinSyn\_1209|Strength:0.001160608

GCGTGTCTGTTTTAGTGAGGTCAGAAGATCAAAGGGCTATGCCTTGAGGAAAAAGAAGAGGTTTAGGTT  
GTCTGCACTCCATCAACAAATAATCCAAGTAAGCGGTATGAAGCATCTTCTTAGCAAGACCTCTACA  
AACTGGTACTTGTATGACCCCGCCGATGACGCGGGACTGCTAGGAAACCAATTATTGCGCATGTA  
GCACACCAGCATGTGTTGATCACCAGCTACAAAAGTGGTACTTGTGTACAGGGCAAAAATGTCAAAGA  
TATGCACCTCACATGTAGCAGTGGTCCCTCCACTACAGGGCTCACTGCTAGGAGGACCTATATAAGG  
TTTTGCTATTCATTGAAAGCAGTAGTGACTGATTTGTATATA

>MinSyn\_1735|Strength:0.001162694

GCGTGTCTGTTTTAGTGAGGCAAATATTTCTTGTATCTTGCCTGCCTTGATGATCCTTACCGCTATGGG  
TAAGATTTAAGATTGATGAAAAGTCAAAAACAAAATCAATTATCTGCTAGGAGGACCGATGCTGATC  
AGGTGGCTCCTACACATGTAGGCTATCAGTCAGAAGATCAAAGGGCTAAGCTTAGCAAGACCTCTAAC  
CACGTCTACAAGTACTTGTGTACAGGGCTCACTGCTAGTGAAGATAAGATAATAATGTTGAAGATAAG  
AAGCTTAGCAAGACCTCTACCTATATAAGGTTTTGCTATTCATTGAAAGCAGTAGTGACTGATTTGTA  
TATA

>MinSyn\_1624|Strength:0.001163901

GCGTGTCTGTTTTAGTGAGGTGAAGATAAGATAATAATGTTGAAGATAAGACAGGTGGCTCCTACCACC  
TCACATGTAGGCTAGCAAGTGGATGTACAGGGCTCACTGCTAGGAGGACCAACCATTATTGCGCTCAC  
ATGTAGGTCTCTCTGCGGACAGTGGTCCCAAAGCTCACTGCTAGGAGGACCGATGCAATTTGCGGAAA  
CCTCCTCGAAGACCCTATATAAGGTTTTGCTATTCATTGAAAGCAGTAGTGACTGATTTGTATATA

>MinSyn\_1289|Strength:0.001165272

GCGTGTCTGTTTTAGTGAGGATCGAAAGGACAGTAAGCTTAGCAAGACCTCTACAAATCCTTACCGCTA  
TGGGTAAGATTCCGATGCTGATAAGATTGATGAAAAGTCAAAAACAAAATCAATTATGACCGATGCT  
GATCTTGCCTTATGACCCCGCCGATGACGCGGGACTGCTAGGAGGACCGATGCTGATCTTGCCTA  
TATAAGGTTTTGCTATTCATTGAAAGCAGTAGTGACTGATTTGTATATA

>MinSyn\_1563|Strength:0.001165289

GCGTGTCTGTTTTAGTGAGGCAAGTGGTCCCTCCACTGCTGATAGGTGGCTCCTACATCTTGCCTGCCT  
GCTATATAAGGTTTTGCTATTCATTGAAAGCAGTAGTGACTGATTTGTATATA

>MinSyn\_1773|Strength:0.0011656

GCGTGTTCGTTTTAGTGAGGAACCATTATTGCGTTGCCTGCCTTAAAAATGTCAAAGATAACTGCTAGG  
AGGACCTATATAAGGTTTTGCTATTCATTGAAAGCAGTAGTGACTGATTTGTATATA

>MinSyn\_1392|Strength:0.001166774

GCGTGTTCGTTTTAGTGAGGGCACACCAGCATGTGTTGATCACCAGCTTATCAGCTTAGCAAGACCAAA  
AATGTCAAAGATACCCAATTAGGTTGTCTGCACCTCACATTTTTCAACAAGTACCAGTGGTCCCTCCA  
CGGTCACGACCACTATGCCCAATTAGTGAAGATAAGATAATAATGTTGAAGATAAGACTTGTGAACCA  
TTATTGCGAACTGGTACTTGTGTACAGGTGGGAGCCACCAACTTGTGTACAGCTATATAAGGTTTTGC  
TATTCATTGAAAGCAGTAGTGACTGATTTGTATATA

>MinSyn\_1025|Strength:0.001168407

GCGTGTTCGTTTTAGTGAGGAGCAAGTGGATTTGATGATTGGTGGAGCACGACAGCTCACTGCTCCATC  
AACAAATAATCCAAGTAAGGCTTAGCAAGACCTCTACAAAACCTTGAAGCATCTTCCCTCACTGCTAGG  
AGGACCGATGCTGATCTTAAGATTGATGAAAAGTCAAAAACAAAATCAATTATCACTATGCTCACTA  
TCAGCTGATCATTGCGATAAAGGAAAGGTGATCTTGCCTGGGAAAAGAAGAGGTCTGCTAGGAGGAC  
CGATGCTGATCTTGCCTCTATATAAGGTTTTGCTATTCATTGAAAGCAGTAGTGACTGATTTGTATAT  
A

>MinSyn\_1501|Strength:0.001168911

GCGTGTTCGTTTTAGTGAGGCAAATATTTCTTGTATCAGCAGGTGGCTCCTACGATCTTGCCTGCCTTG  
AAAGATTGATGAAAAGTCAAAAACAAAATCAATTATGTAGGCTATCAGCTTAGCAAGACATTGCGAT  
AAAGGAAAGGGCTGATCTTGCCTGCCTTGTGATCAGAAGATCAAAGGGCTAAAGCAAGTGGATGCC  
ACTATATAAGGTTTTGCTATTCATTGAAAGCAGTAGTGACTGATTTGTATATA

>MinSyn\_1642|Strength:0.001171816

GCGTGTTCGTTTTAGTGAGGTCCATCAACAAATAATCCAAGTAAGTTAGCACAGCCACTTGTGTGTTGT  
CAAATATTTCTTGTAAAGACCTCTACAAAACCTGGTACTTGGAGTGGCTCCTACCTGCCTTGTGAGAAG  
ATCAAAGGGCTAGGCTCACTGCTAGGAGCTATATAAGGTTTTGCTATTCATTGAAAGCAGTAGTGACT  
GATTTGTATATA

>MinSyn\_1180|Strength:0.001171913

GCGTGTTCGTTTTAGTGAGGTCACTATCAGCCACTGCTAGGAGGACCGATGCTCAGAAGATCAAAGGGC  
TACTCTACAATGGTGGAGCACGACAATGCCAATTAGGCTATATAAGGTTTTGCTATTCATTGAAAGC  
AGTAGTGACTGATTTGTATATA

>MinSyn\_1843|Strength:0.001172035

GCGTGTTCGTTTTAGTGAGGAGGTGGCTCCTACCTAAAAATGTCAAAGATACTTGC GGAAAAAGAAGAG  
GTCACCTCACATGTAGGCTATCAAACCACGTCTACAAAACAAAACCTGGTACTTGTGTACAGGGCTCAA  
GATTGATGAAAAGTCAAAAACAAAATCAATTATACGACCACTATGTGGGAGCCACCAAACTGGTACT  
TGTGTACAGGGCTCACTGCTCTATATAAGGTTTTGCTATTCATTGAAAGCAGTAGTGACTGATTTGTA  
TATA

>MinSyn\_1312|Strength:0.001172528

GCGTGTTCGTTTTAGTGAGGCAAATATTTCTTGTCAAAACTCCATCAACAAATAATCCAAGTAAGTTAG  
GTTGTAGGTGGCTCCTACCTCACATGTAGGCTATCAGCTTAGCAAAATTTCCGGGAAACCTCCTCGCTC  
ACTGCTAGGAGGACTCTCTGCGGACAGTGGTCCCAAACACGAACCACGTCTACAATACAAAACCTGG  
TACTTGTGTACAGGGCTCACTATATAAGGTTTTGCTATTCATTGAAAGCAGTAGTGACTGATTTGTAT  
ATA

>MinSyn\_1150|Strength:0.001173184

GCGTGTTCGTTTTAGTGAGGTCTCTCTGCCGACAGTGGTCCCAAATGCCTGAAGATAAGATAATAATG  
TTGAAGATAAGACTGGTACCAGTGGTCCCTCCACACCTCAATTTCCGGGAAACCTCCTCGTAGGAGCAC  
ACCAGCATGTGTTGATCACCAGCTTGCCTGCCTTGTGATAAGCAAGTGGATCTACAAAACCTGGTAC  
TTGTGTACAGCTATATAAGGTTTTGCTATTCATTGAAAGCAGTAGTGACTGATTTGTATATA

>MinSyn\_1144|Strength:0.001173861

GCGTGTTCGTTTTAGTGAGGAAGATTGATGAAAAGTCAAAAACAAAATCAATTATGTAGGCTATCAGC  
TTAGCAAGTCTCTCTGCCGACAGTGGTCCCAAATGCTGATCTTGCCTGCCTTCTATATAAGGTTTTGC  
TATTCATTGAAAGCAGTAGTGACTGATTTGTATATA

>MinSyn\_1704|Strength:0.001175

GCGTGTTCGTTTTAGTGAGGCAGCCACTTGTGTACTTGTGTACAGGGCTCAAAAATGTCAAAGATAGC  
CTTGCTATATAAGGTTTTGCTATTCATTGAAAGCAGTAGTGACTGATTTGTATATA

>MinSyn\_1904|Strength:0.001175894

GCGTGTCTGTTTTAGTGAGGATTGCGATAAAGGAAAGGTAGGTTGTCTGCACCTTATGACCCCCGCCGA  
TGACGCGGGAATGTAGGCTATCAGCTTAGCAAGAATCCTTACCGCTATGGGTAAGATTCCACTATGCC  
CAATTTCCATCAACAAATAATCCAAGTAAGGAGGAGCACACCAGCATGTGTTGATCACCAGCTGCTAG  
GAGGACCGATGCTGATCTTTTTCAACAAGCCCAATTAGGTTGTCTGCACCTCACATGTCACTATCAG  
CCCTATATAAGGTTTTGCTATTCATTGAAAGCAGTAGTGACTGATTTGTATATA

>MinSyn\_1145|Strength:0.001176612

GCGTGTCTGTTTTAGTGAGGTGAAGCATCTTCCTTAGGTTGTCTGCACCTCACATCCTTACCGCTATGG  
GTAAGATTGGGCTCACTGCTAGGAGGACCGATGCAATTTCCGGAAACCTCCTCGCAGGGCTCACTTGA  
AGATAAGATAATAATGTTGAAGATAAGAATGCTGATCTTGCTGCCTCTATATAAGGTTTTGCTATTC  
ATTGAAAGCAGTAGTGACTGATTTGTATATA

>MinSyn\_1486|Strength:0.001179716

GCGTGTCTGTTTTAGTGAGGTTTTCAACAATAGGTCACGTGGGAGCCACCAAGGTCACGACCACTATGC  
GCACACCAGCATGTGTTGATCACCAGCTCTTGCCATAATTTCCGGAAACCTCCTCGACTATGCCCAATT  
AGGTTGTCTGCACCAACCACGTCTACAATCGCGGTAGGTCACAAAATGTCAAAGATACATGTAGGTG  
GCTCCTACTACTTGTGTACAGGGGAAAAAGAAGAGGTTCCGCGGTAGTGGTGGAGCACGACAACCTTGTG  
TACAGGGCTCACTGCTATATAAGGTTTTGCTATTCATTGAAAGCAGTAGTGACTGATTTGTATATA

>MinSyn\_1128|Strength:0.001184252

GCGTGTCTGTTTTAGTGAGGGGAAAAAGAAGAGGTACCACTATGCCCAATTAGGTTGTTGGTGGAGCAC  
GACTCCTATATAAGGTTTTGCTATTCATTGAAAGCAGTAGTGACTGATTTGTATATA

>MinSyn\_1297|Strength:0.001184755

GCGTGTCTGTTTTAGTGAGGTGAAGCATCTCCGCGGTAGGTCATCCTTACCGCTATGGGTAAGATTT  
GCTAGGAGGACCGATGCTGAAAGATTGATGAAAAGTCAAAAACAAAATCAATTATTACAAAACAGCA  
AGTGGATCTAGGAGGACCGATGCTGATCTTGCGCACACCAGCATGTGTTGATCACCAGCTACCTCTAC  
AAAAGTGTACTTGTGTAATTTCCGGAAACCTCCTCGATGTAGGCTATCTATATAAGGTTTTGCTATT  
CATTGAAAGCAGTAGTGACTGATTTGTATATA

>MinSyn\_1360|Strength:0.001184792

GCGTGTCTGTTTTAGTGAGGGCACACCAGCATGTGTTGATCACCAGCTACCTCTACAAAATGAAGATAA  
GATAATAATGTTGAAGATAAGATCTACAAAAGTGGTACTTGTGTACAGGGCTCTATATAAGGTTTTGC  
TATTCATTGAAAGCAGTAGTGACTGATTTGTATATA

>MinSyn\_1016|Strength:0.001185336

GCGTGTCTGTTTTAGTGAGGAAAAATGTCAAAGATAACTATGCCCAATTAGTGGTGGAGCACGACAACA  
AATATTTCTTGACCTCTACAAAAGTGGTACTTGTGTAACCACGTCTACAAATAATTGCGATAAAGGA  
AAGGTAGGAGGACCGATGCTGATCTTGCCGCCATCCTTACCGCTATGGGTAAGATTGTCTGCCAGTG  
GTCCCTCCACAGCTTAGTCCATCAACAAATAATCCAAGTAAGCACTGCTAGGAGGACCGATGCTGATC  
TTGCTATATAAGGTTTTGCTATTCATTGAAAGCAGTAGTGACTGATTTGTATATA

>MinSyn\_1496|Strength:0.001185586

GCGTGTCTGTTTTAGTGAGGCAGTGGTCCCTCCACCCGATGCTAAAAATGTCAAAGATACACTATGCCC  
AATTAGGTTGAGCAAGTGGATCTATGCCATTATGACCCCCGCCGATGACGCGGGAAGGGCTCACTGT  
CAGAAGATCAAAGGGCTAAGCAAGACCTCTACAATAATAAGGTTTTGCTATTCATTGAAAGCAGTA  
GTGACTGATTTGTATATA

>MinSyn\_1187|Strength:0.001186972

GCGTGTCTGTTTTAGTGAGGTGAAGATAAGATAATAATGTTGAAGATAAGACTCACATGTAGGCTATCA  
GCCAGTGGTCCCTCCACGGCACACCAGCATGTGTTGATCACCAGCTATCAGCTTAGCAAGACGCTTTG  
TCAAAAAGCTAAAAAAGATGATGCCTAGGAGGACCGATGCTGATCATTGCGATAAAGGAAAGGACAGGG  
CTCACTGCTAGGAAGATTGATGAAAAGTCAAAAACAAAATCAATTATTAGGCTATCAGCTTAGCAAG  
ACCAATTTCCGGAAACCTCCTCGCAATTAGGTTGTCTATATAAGGTTTTGCTATTCATTGAAAGCAGT  
AGTGACTGATTTGTATATA

>MinSyn\_1450|Strength:0.001187181

GCGTGTCTGTTTTAGTGAGGAAAAATGTCAAAGATAAGGAGGACCTCAGAAGATCAAAGGGCTACAAGA  
CCTCTACAAAAGTAAATTTCCGGAAACCTCCTCGGTCTGATTGCGATAAAGGAAAGGATGCCCAATTAG  
GTTGTCTGCAATCGAAAGGACAGTAGCGGTAGGTCACGACCTATATAAGGTTTTGCTATTCATTGAAA  
GCAGTAGTGACTGATTTGTATATA

>MinSyn\_1658|Strength:0.00118726

GCGTGTCTGTTTTAGTGAGGGCACACCAGCATGTGTTGATCACCAGCTTGCCCAATTAGGTTGTCTGCA



CCTCACTCCATCAACAAATAATCCAAGTAAGCTATCAGCTTAGCAAGACCTCTACAAAACAATTCGG  
GAAACCTCCTCGATTAGGTTTCACTATCAGCTACTTGTGAAGATTGATGAAAAGTCAAAAACAAAAT  
CAATTATCGCGGTAGGTCACGACCACTATGCCCTTTTCAACAAACCACTATGCCCTTATGACCCCCG  
CGATGACGCGGGAGCAAGACCTCTACAAAAGTGGTACTTGTATCCTTACCGCTATGGGTAAGATTCAA  
TTAGGTTGTCTCAAATATTTCTTGTACGACCACTATGCCCAATTAGCTATATAAGGTTTTGCTATTCA  
TTGAAAGCAGTAGTGACTGATTTGTATATA

>MinSyn\_1968|Strength:0.001187915

GCGTGTCTGTTTTAGTGAGGAGGTGGCTCCTACTAGGTTGTCTGCTCAGAAGATCAAAGGGCTAGGGCT  
CACTCAGTGGTCCCTCCACCTAGGAGGACCGATGCTGATCTATATAAGGTTTTGCTATTCATTGAAAG  
CAGTAGTGACTGATTTGTATATA

>MinSyn\_1567|Strength:0.00119055

GCGTGTCTGTTTTAGTGAGGGTGGGAGCCACCACTCTACAAAAGTGGTACTTGTAAAAATGTCAAAGAT  
AGTCTGCAATTCGGGAAACCTCCTCGATGCCCAATTAGGTTGTCTGCGCACACCAGCATGTGTTGAT  
CACCAGCTGTTCTCTGCGGACAGTGGTCCCAAATGGTACTTGTGTACAGGGCTCACTGCTGAAGCA  
TCTTCTAGGTTGTCTGCACCTCACATGTAGTGAAGATAAGATAATAATGTTGAAGATAAGACACTAT  
GCCCAATTAGGTTGTCTGAAAAAGAAGAGGTGGCTCACTGCTAGGAGGACCCTATATAAGGTTTTGCT  
ATTCATTGAAAGCAGTAGTGACTGATTTGTATATA

>MinSyn\_1132|Strength:0.00119218

GCGTGTCTGTTTTAGTGAGGAACCACGTCTACAAAGGTCACGACCACTATGCCCAATGTGGGAGCCACC  
AGCTGATCTTGCCCAAATATTTCTTGTGATGCACACCAGCATGTGTTGATCACCAGCTCGGTAGGTCA  
CGACCACAATTCGGGAAACCTCCTCGACCTCACATGTAGGCTATCAGCTTAGAGGTGGCTCCTACAG  
CTTAGCAAGATCCTTACCGCTATGGGTAAGATTCTGCTAGGAGGACCGATGCTGATCAGAAGATCAA  
GGGCTACGACCACTATTTTTCAACAATCTTGCCTGCCCTATATAAGGTTTTGCTATTCATTGAAAGCA  
GTAGTGACTGATTTGTATATA

>MinSyn\_1867|Strength:0.001193813

GCGTGTCTGTTTTAGTGAGGCAAATATTTCTTGTACCAAATTCGGGAAACCTCCTCGCTGATCTTGCC  
TGCCTTGATGATATTTTCAACAAATGCCCAATTAGGTTGTCTGCACCTCACGAAAAAGAAGAGGTGC  
TATCAGCTTAGCAAGATGAAGCATCTTCTATCAGCTTAGCAATCACTATCAGCAGGGCTCACTGCTA  
TCTCTCTGCCGACAGTGGTCCCAAACCAATTAGGAAAAATGTCAAAGATATGCTAGGAGGACCGATGC  
TGATATTGCGATAAAGGAAAGGGCTATATAAGGTTTTGCTATTCATTGAAAGCAGTAGTGACTGATTT  
GTATATA

>MinSyn\_1601|Strength:0.001194577

GCGTGTCTGTTTTAGTGAGGCAGTGGTCCCTCCACGGGCTCAACCACGTCTACAAGACCTCTACAAAAC  
TGGTACTTGTGTACAGAAAAATGTCAAAGATACTATGCCTTTTCAACAATGCCCAAACCAATTATTGC  
GTCACATGTAGGCCTATATAAGGTTTTGCTATTCATTGAAAGCAGTAGTGACTGATTTGTATATA

>MinSyn\_1493|Strength:0.001194786

GCGTGTCTGTTTTAGTGAGGTCATCAGCTGGTACTTGTGTACAGCAGCCACTTGTGTTGATCAGTG  
GTCCCTCCACTAGGCTATCAGCTTAAAAAATGTCAAAGATAATCTTGCCTAATTCGGGAAACCTCCT  
CGACGACCACTATGCCCAATTAGGTTGTCTGCACACCAGCATGTGTTGATCACCAGCTCACTATGCCT  
ATATAAGGTTTTGCTATTCATTGAAAGCAGTAGTGACTGATTTGTATATA

>MinSyn\_1357|Strength:0.001196069

GCGTGTCTGTTTTAGTGAGGAATTCGGGAAACCTCCTCGATGCTGATCAGTGGTCCCTCCACGTACAG  
GGCTCACTGCTAGGAGGACTGAAGCATCTTCCAGGAGGACCGATTCTCTCTGCCGACAGTGGTCCCAA  
AACCTCTACAAAAGTCTATATAAGGTTTTGCTATTCATTGAAAGCAGTAGTGACTGATTTGTATATA

>MinSyn\_1271|Strength:0.001196343

GCGTGTCTGTTTTAGTGAGGTTTTCAACAACCAATTAGGTTGTCTGCACCTCAAATTCGGGAAACCT  
CCTCGTAGCAAGACCTCTCAAATATTTCTTGTGGACCGATTTATGACCCCCCGCGATGACGCGGGACT  
GGTACTTGTGTACAAGGTGGCTCCTACAATTAGGTTGTCTGGTGGGAGCCACCATATGCCCTATATA  
AGGTTTTGCTATTCATTGAAAGCAGTAGTGACTGATTTGTATATA

>MinSyn\_1089|Strength:0.001203319

GCGTGTCTGTTTTAGTGAGGTCTCTCTGCCGACAGTGGTCCCAAAGCACCTCATTTTTCAACAATTGTGT  
ACAGGGCTCACTGCTAGGAGGACATCCTTACCGCTATGGGTAAGATTTCTACAAAAGTGGTACTTGTG  
TACTGAAGATAAGATAATAATGTTGAAGATAAGATTAGGTTGTCTGCACCTCACATGTAGCACACCAG  
CATGTGTTGATCACCAGCTCTTGTGTACCTATATAAGGTTTTGCTATTCATTGAAAGCAGTAGTGACT

GATTTGTATATA

>MinSyn\_1385|Strength:0.001203817

GCGTGTTCGTTTTAGTGAGGTTTTCAACAAGCCTGCCTTGATCCATCAACAAATAATCCAAGTAAGGCT  
TAGCAAGACCTCTGTGGGAGCCACCATGGTACTTGTGTACAGGGCTCCTATATAAGGTTTTGCTATTC  
ATTGAAAGCAGTAGTGACTGATTTGTATATA

>MinSyn\_1010|Strength:0.001203877

GCGTGTTCGTTTTAGTGAGGTGAAGCATCTTCCCTACAAAACCTGGTACTTGTGTACAGAGGTGGCTCCT  
ACCACTATGCCCAATTAGGTTGTCCAGCCACTTGTGTCTGCTAGGAGGACCGTGAAGATAAGATAATA  
ATGTTGAAGATAAGACGCGGTAGGTCCTATATAAGGTTTTGCTATTCATTGAAAGCAGTAGTGACTGA  
TTTGTATATA

>MinSyn\_1427|Strength:0.0012047

GCGTGTTCGTTTTAGTGAGGAACACGTCTACAAAACCTGGTACTTGTGTACAGGGCTCACAGGTG  
GCTCTACGGACCGATGCTGATCTTGCCTGTTTTCAACAATGTACAGGGGAAAAGAAGAGGTAGGT  
GGTGGAGCACGACAATCTTCTATATAAGGTTTTGCTATTCATTGAAAGCAGTAGTGACTGATTTGTAT  
ATA

>MinSyn\_1670|Strength:0.001204723

GCGTGTTCGTTTTAGTGAGGATTGCGATAAAGGAAAGGAGGGCTCACTGCTAGAACCATTATTGCGCTC  
ACTGCTAGGACAGTGGTCCCTCCACCCTCTACAAAACCTGGTACTTGTGTACAGCAAATATTTCTTGTG  
GAGGACCGATGCTGATCTATCGAAAGGACAGTAATGTAGGCTATCTCCATCAACAAATAATCCAAGTA  
AGTGCTATATAAGGTTTTGCTATTCATTGAAAGCAGTAGTGACTGATTTGTATATA

>MinSyn\_1791|Strength:0.001206829

GCGTGTTCGTTTTAGTGAGGAACACGTCTACAAAACCTGGTACTTGTGTACAGGGCTCACTGAGCAAGT  
GGATAGGTTGTCTGCACCTCAGCTTTGTCAAAGCTAAAAAGATGATGCACCTCACATGTTCTCTCT  
GCCGACAGTGGTCCCAAACCTCTACTCACTATCAGCCCTGCCTTGATGATTCCATCAACAAATAATCC  
AAGTAAGCTAGGAGGACCGATGCTGATCTTGCCTGAAGATTGATGAAAAGTCAAAAACAAAATCAAT  
TATTGCACCTCACAGGTGGCTCCTACGTGTCTATATAAGGTTTTGCTATTCATTGAAAGCAGTAGTGA  
CTGATTTGTATATA

>MinSyn\_1191|Strength:0.001207204

GCGTGTTCGTTTTAGTGAGGGCACACCAGCATGTGTTGATCACCAGCTTCTACAAAACCTGGTACTTGTG  
CAAATATTTCTTGTGTTGTCTGCACCTACAAGGTGGCTCCTACCGTCTCTCTGCCGACAGTGGTCCC  
AAACTTGTGTACAGGGCTCACTAACCACGTCTACAATAGGAGGACCGATGCTGATCCTATATAAGGTT  
TTGCTATTCATTGAAAGCAGTAGTGACTGATTTGTATATA

>MinSyn\_1339|Strength:0.001207311

GCGTGTTCGTTTTAGTGAGGCAGTGGTCCCTCCACGGCTATCCATCAACAAATAATCCAAGTAAGGGAC  
CGATGCTGATCTTGCCTGCCTTCAAATTTGGGAAACCTCCTCGCTATGCCCAATTATCAGAAGATCA  
AAGGGCTAGATGAGCAAGTGGATTACTATATAAGGTTTTGCTATTCATTGAAAGCAGTAGTGACTGAT  
TTGTATATA

>MinSyn\_1699|Strength:0.001208571

GCGTGTTCGTTTTAGTGAGGTCAGAAGATCAAAGGGCTACAATTAGGTTGGAAAAAGAAGAGGTCAAGA  
CCTCTACAAAACCTGGTACTTCTATATAAGGTTTTGCTATTCATTGAAAGCAGTAGTGACTGATTTGTA  
TATA

>MinSyn\_1880|Strength:0.001209116

GCGTGTTCGTTTTAGTGAGGGAAAAAGAAGAGGTAAGACCTCTACAAAACCTGGTACAGCCACTTGTGT  
GAGGGTGGGAGCCACCAGGAGGACCGATCCATCAACAAATAATCCAAGTAAGCCTCACATGTAGGCTA  
TCAGCAAGATTGATGAAAAGTCAAAAACAAAATCAATTATTGCTGATCTTGCCTGCCTTGATGATAC  
TATATAAGGTTTTGCTATTCATTGAAAGCAGTAGTGACTGATTTGTATATA

>MinSyn\_1581|Strength:0.001211663

GCGTGTTCGTTTTAGTGAGGAATTTGGGAAACCTCCTCGGCCTGCCTCAGCCACTTGTGTACCTCTA  
CAGGAAAAAGAAGAGGTGTTGTCTGGTGGGAGCCACCAGCTATCAGCTTAGCAAGACCTCTTGAAGAT  
AAGATAATAATGTTGAAGATAAGATAGCAAATATTTCTTGTCTATGCCCAATTAGGTTGTCATCCTTA  
CCGCTATGGGTAAGATTTGTACAGGGCTCACTGCTAGGCTATATAAGGTTTTGCTATTCATTGAAAGC  
AGTAGTGACTGATTTGTATATA

>MinSyn\_1127|Strength:0.001214045

GCGTGTTCGTTTTAGTGAGGAAAAATGTCAAAGATATCTGCACCTCACATGTAGGCTATCAGCAGGTGG

CTCCTACACCGATGTGGGAGCCACCAGGACCGATGCTGATAAGATTGATGAAAAGTCAAAAACAAAA  
TCAATTATCTGGTACTTGTGTACAGGCTATATAAGGTTTTGCTATTCATTGAAAGCAGTAGTGACTGA  
TTTGTATATA

>MinSyn\_1348|Strength:0.001218745

GCGTGTTCGTTTTAGTGAGGGTGGGAGCCACCATGTGTACAGGGCTAAGATTGATGAAAAGTCAAAAAC  
AAAAATCAATTATGCTAGGAGGACGCACACCAGCATGTGTTGATCACCAGCTGACCGATGCTGATCTT  
GCCTGCCTTGATGCTATATAAGGTTTTGCTATTCATTGAAAGCAGTAGTGACTGATTTGTATATA

>MinSyn\_1946|Strength:0.001222589

GCGTGTTCGTTTTAGTGAGGGCTTTGTCAAAAAGCTAAAAAAGATGATGCTAGGAGGACCGATGCTGATC  
TCTCTCTGCCGACAGTGGTCCCAAAGTGAAGCATCTTCCCACGACCACTGGAAAAAGAAGAGGTCCGT  
AACCACGCTACAACCTGCACCTCACATCAGAAGATCAAAGGGCTAAGGACCGATGCTGATCTTCTATA  
TAAGGTTTTGCTATTCATTGAAAGCAGTAGTGACTGATTTGTATATA

>MinSyn\_1531|Strength:0.001222751

GCGTGTTCGTTTTAGTGAGGAACCATTATTGCGCAATTAGGTCAGCCACTTGTGTCTTGTGTAAGATTG  
ATGAAAAGTCAAAAACAAAAATCAATTATTCAGTCTAGGATGAAGCATCTTCCCTACAAAACCTGGTA  
CTTGTGTACAGGGCAGTGGTCCCTCCACTGATCTTGCCTGCCTCTCTCTGCCGACAGTGGTCCCAAAC  
ACTATGCCCAATTAGGTTCTATATAAGGTTTTGCTATTCATTGAAAGCAGTAGTGACTGATTTGTATA  
TA

>MinSyn\_1381|Strength:0.001224474

GCGTGTTCGTTTTAGTGAGGTCAGAAGATCAAAGGGCTATCTGTGAAGATAAGATAATAATGTTGAAGA  
TAAGAACAGGGCTCACTGCTAGGAGGACCGATCTATATAAGGTTTTGCTATTCATTGAAAGCAGTAGT  
GACTGATTTGTATATA

>MinSyn\_1729|Strength:0.001224865

GCGTGTTCGTTTTAGTGAGGAACCACGTCTACAAAGCTTAGCAAGACCTCTACAAAGCAAGTGGATAGG  
CTATCAGCTTAGCAAGACAAAAATGTCAAAGATAATTAGTGTCTGCACCTCAAGATTGATGAAAAG  
TCAAAAACAAAAATCAATTATGGCTATCAGCTTAGGGAAAAAGAAGAGGTCCGGTAGGTTATGACCC  
CCGCCGATGACGCGGGATCACTGCTAGGAGGACCGATGCTGATTCCATCAACAAATAATCCAAGTAAG  
GTACAACCATTATTGCGGATCTTGCCTGCCTTGATGATACTATATAAGGTTTTGCTATTCATTGAAAG  
CAGTAGTGACTGATTTGTATATA

>MinSyn\_1510|Strength:0.00122806

GCGTGTTCGTTTTAGTGAGGGCACACCAGCATGTGTTGATCACCAGCTGGTAGGTCACGACCACTATGC  
AACCATTATTGCGCGGTAGGTCACGTCTCTGCGGACAGTGGTCCCAAACACATGTAGGCTATCAGC  
TTAGCCAAATATTTCTTGTGTGTACAGGGCTCAATTTCCGGAAACCTCCTCGCTGATCCTATATAAG  
GTTTTGCTATTCATTGAAAGCAGTAGTGACTGATTTGTATATA

>MinSyn\_1796|Strength:0.001229908

GCGTGTTCGTTTTAGTGAGGTCCATCAACAAATAATCCAAGTAAGCTCTACAATGGTGGAGCACGACAT  
ACAAAACGGTACTTGTGTACAGGGCTCAAGATTGATGAAAAGTCAAAAACAAAAATCAATTATACAA  
AACTGGTACTTCTATATAAGGTTTTGCTATTCATTGAAAGCAGTAGTGACTGATTTGTATATA

>MinSyn\_1586|Strength:0.001230952

GCGTGTTCGTTTTAGTGAGGAAAAATGTCAAAGATACCACTATGCCCAATGGTGGAGCACGACACACAT  
GTAGGCCTATATAAGGTTTTGCTATTCATTGAAAGCAGTAGTGACTGATTTGTATATA

>MinSyn\_1776|Strength:0.001231724

GCGTGTTCGTTTTAGTGAGGAAAAATGTCAAAGATAGGTAGGTCACGAAATTTCCGGAAACCTCCTCGG  
CTAGGAGGACCGATGCTGATCTTGCCTATATAAGGTTTTGCTATTCATTGAAAGCAGTAGTGACTGAT  
TTGTATATA

>MinSyn\_1029|Strength:0.001232497

GCGTGTTCGTTTTAGTGAGGTTATGACCCCCGCCGATGACGCGGGATTCTCTCTGCCGACAGTGGTCCC  
AAACGACCACTATGCATCCTTACCGCTATGGGTAAGATTATTAGGTTGTCTGCACCTCACATGAATTT  
CGGGAAACCTCCTCGTGGTACTTGTTCACAAATAGGTCACGACCACTATCTATATAAGGTTTTGCT  
ATTCATTGAAAGCAGTAGTGACTGATTTGTATATA

>MinSyn\_1425|Strength:0.001234153

GCGTGTTCGTTTTAGTGAGGCAAATATTTCTTGTTTAGGTTGTCTGCACAATTTCCGGAAACCTCCTCG  
TCACTGCTAGGAGGACCGATGCTGATTGAAGATAAGATAATAATGTTGAAGATAAGACAGCTTAGCAA  
AAATGTCAAAGATATGATCTTGCCTGTTATGACCCCCGCCGATGACGCGGGACTCTACAAAACCTGGGA

AAAAGAAGAGGTCTTGTGTACAGGGCTCACTGCTAGGAGGCTATATAAGGTTTTGCTATTCATTGAAA  
GCAGTAGTACTGATTTGTATATA

>MinSyn\_1950|Strength:0.001238784

GCGTGTTCGTTTTAGTGAGGGGAAAAGAAGAGTTGCTGCCTTTGAAGATAAGATAATAATGTTGAA  
GATAAGAGCTCACTGCTAGGAGGCAAATATTTCTTGTAGCAAGACCTCTACAAAAGTGGTAGTGGGA  
GCCACCATAGCAAGACTCCATCAACAAATAATCCAAGTAAGTACTTGTGTACAGCTATATAAGGTTTT  
GCTATTCATTGAAAGCAGTAGTGACTGATTTGTATATA

>MinSyn\_1480|Strength:0.001239296

GCGTGTTCGTTTTAGTGAGGCAAATATTTCTTGTGGTCACGACCAGCAAGTGGATCACATGTAGGCTAA  
CCACGTCTACAAGCCCAATTAGGTTGTCTGCACCTCAGCACACCAGCATGTGTTGATCACCAGCTGTC  
AGAAGATCAAAGGGCTATAGGCTGGTGGAGCACGACAGTTGTCTGCACCTCACATTGAAGCATCTTC  
CAAAGTGGTACTTGTGTACAGGGCTCAAATTTGCGGAAACCTCCTCGTCTATATAAGGTTTTGCTATT  
CATTGAAAGCAGTAGTGACTGATTTGTATATA

>MinSyn\_1443|Strength:0.001240917

GCGTGTTCGTTTTAGTGAGGAACCATTATTGCGGCCCAATTAGGTTGTCTCAAATATTTCTTGTACCAC  
TATGCCCAATTATTTTCAACAAGGCCAGTGGTCCCTCCACTGATCTTGCCTGCCTTGATGAGGTGGCT  
CCTACTGCCTGCCTTAAGATTGATGAAAAGTCAAAAACAAAATCAATTATGGGCTCACTGCTAGGAG  
GACCGATGCGTGGGAGCCACCACACCTCACATGTCTATATAAGGTTTTGCTATTCATTGAAAGCAGTA  
GTGACTGATTTGTATATA

>MinSyn\_1309|Strength:0.001241396

GCGTGTTCGTTTTAGTGAGGGCTTTGTCAAAGCTAAAAAGATGATGCAAAGTGGTTCCTATCAGCC  
ACGACCAGTGGGAGCCACCAGCTTAGCAAGACCTCAGCAAGTGGATCTTGGCACACCAGCATGTGTTG  
ATCACCAGCTATGTAGGCTATCAGCTTAGCAAGAAAGATTGATGAAAAGTCAAAAACAAAATCAATT  
ATGGAGCAGCCACTTGTGTTGTGTACAGGGCTCACTCTATATAAGGTTTTGCTATTCATTGAAAGCAG  
TAGTGACTGATTTGTATATA

>MinSyn\_1856|Strength:0.001245289

GCGTGTTCGTTTTAGTGAGGAAAATGTCAAAGATATCAGCTTAGCAAGACCTCTACAAAAGTCCAT  
CAACAAATAATCCAAGTAAGGGTTGTCTGCACCTCTGAAGCATCTTCTTCTATATAAGGTTTTGCTA  
TTCATTGAAAGCAGTAGTGACTGATTTGTATATA

>MinSyn\_1841|Strength:0.001247467

GCGTGTTCGTTTTAGTGAGGTCAGAAGATCAAAGGGCTAACTGGTACTTGTGTACAGGATCCTTACCGC  
TATGGGTAAGATTTACAGGGCAACCATTATTGCGGGACCGATGCTGATCTTCTATATAAGGTTTTGCT  
ATTCATTGAAAGCAGTAGTGACTGATTTGTATATA

>MinSyn\_1807|Strength:0.001248041

GCGTGTTCGTTTTAGTGAGGAAAATGTCAAAGATAGCCTGCCTTGATTGCGATAAAGGAAAGGCTATC  
AGCTTAGCAAGACCTCTACAAAAGTGGTGGCTCCTACCACATGTAGGCTATTTATGACCCCGCCGA  
TGACGCGGGAACCTATATAAGGTTTTGCTATTCATTGAAAGCAGTAGTGACTGATTTGTATATA

>MinSyn\_1268|Strength:0.001250065

GCGTGTTCGTTTTAGTGAGGTTTTCAACAACCTATCAGCTTAGCAAGACCTCTACAAAACAACCATTATT  
GCGGTGAACCACGTCTACAATATGCCCAATTAGGTTGTGCACACCAGCATGTGTTGATCACCAGCTCG  
TGGGAGCCACCCTATGCCCAATTAGGTTGTCTGCACCTCTCAGAAGATCAAAGGGCTATCTTCTATA  
TAAGGTTTTGCTATTCATTGAAAGCAGTAGTGACTGATTTGTATATA

>MinSyn\_1051|Strength:0.001251079

GCGTGTTCGTTTTAGTGAGGAGCAAGTGGATACTTGTGTACAGGGCTCAAAGATTGATGAAAAGTCAA  
AACAAAATCAATTATCAACTATATAAGGTTTTGCTATTCATTGAAAGCAGTAGTGACTGATTTGTAT  
ATA

>MinSyn\_1164|Strength:0.001253891

GCGTGTTCGTTTTAGTGAGGATGAGCTAAGCACATACGTCAGTCACTTAGCAAGACCTCTACAAAAGT  
GGTAACCATTATTGCGACCTCTACAAAAGTGAAGATAAGATAATAATGTTGAAGATAAGAAAAGTGG  
GTACCAGTGGTCCCTCCACAAAAGTGGTACTTGTGTATTGCGATAAAGGAAAGGGGTTGTCTGCACCTC  
ACTTATGACCCCGCCGATGACGCGGGAAATGGAAGAAAGAGGTTGTCAGAAGATCAAAGGGCTAGG  
TACTTGTGTACAGTCACTATCAGCAAGACCTCTACAAAAGTGGTACTTGTCTATATAAGGTTTTGCTAT  
TCATTGAAAGCAGTAGTGACTGATTTGTATATA

>MinSyn\_1611|Strength:0.001253974

GCGTGTGTTTTAGTGAGGGCACACCAGCATGTGTTGATCACCAGCTCCTCTACAAAACCTGGTACTTG  
TGTTTCAGAAGATCAAAGGGCTACCTGCCTATCCTTACCGCTATGGGTAAGATTTTGTGTACAGGGCTC  
ACTGGGAAAAAGAAGAGGTATCTTGCTGCCTTGACTATATAAGGTTTTGCTATTCATTGAAAGCAGT  
AGTGACTGATTTGTATATA

>MinSyn\_1974|Strength:0.001254936

GCGTGTGTTTTAGTGAGGTGAAGATAAGATAATAATGTTGAAGATAAGACGCGGTAGGTCACGACCA  
CTATATCGAAAGGACAGTAACCTCTACAAAACCTGGTACTTGTGTGGAAAAAGAAGAGGTCTGGTACTT  
CAGAAGATCAAAGGGCTATTATCTCTCTGCCGACAGTGGTCCCAAACCAATTAGAACCACGTCTACAA  
TGTACAGGGCTCACTGCTGCACACCAGCATGTGTTGATCACCAGCTTCAGCTTAGTCACTATCAGCAC  
CACTATGCCCAATTAGGTTGTCTGCACCCTATATAAGGTTTTGCTATTCATTGAAAGCAGTAGTGACT  
GATTTGTATATA

>MinSyn\_1171|Strength:0.001258361

GCGTGTGTTTTAGTGAGGAATTCGGGAAACCTCCTCGCCAGCCACTTGTGTTTAGGTTGTCTGCAC  
CTCACATGAAAAATGTCAAAGATAGGTCACGACCACTATGCCTCCATCAACAAATAATCCAAGTAAGG  
TACAGGGCTCACCTATATAAGGTTTTGCTATTCATTGAAAGCAGTAGTGACTGATTTGTATATA

>MinSyn\_1431|Strength:0.00125863

GCGTGTGTTTTAGTGAGGCAGCCACTTGTGTGCAAGACAACCATTATTGCGTGTCTGCACCTCACAT  
GTTCTCTCTGCCGACAGTGGTCCCAAACGCGGTAGGGTGGGAGCCACCAAATTAGGTTGTCTGCACCT  
CACATGAAGCATCTTCCTATCGAAAGGACAGTATAGGTCACGACCACTATGCAACCACGTCTACAATA  
GCAAGACTATATAAGGTTTTGCTATTCATTGAAAGCAGTAGTGACTGATTTGTATATA

>MinSyn\_1226|Strength:0.00125968

GCGTGTGTTTTAGTGAGGTCACTATCAGCCTATGAACCATTATTGCGTTAGGTGAAGATAAGATAAT  
AATGTTGAAGATAAGAATGCTGATCTTGCTGCCTTGAGCACACCAGCATGTGTTGATCACCAGCTTG  
GTACTTATCGAAAGGACAGTAAGGACCGATGCTGATCTTGCGGAAAAAGAAGAGGTGAGCTTAGCAAG  
ACCTCTACAAAAAAGATTGATGAAAAGTCAAAAAACAAAAATCAATTATCGCGGTAGGTCACGACCCTA  
TATAAGGTTTTGCTATTCATTGAAAGCAGTAGTGACTGATTTGTATATA

>MinSyn\_1989|Strength:0.001261901

GCGTGTGTTTTAGTGAGGGGAAAAAGAAGAGTTTTGATGATAATCGAAAGGACAGTAGTACTTGTGT  
ACAGGGCTCACTGCTAGAACCACGTCTACAATGATCCTTACCGCTATGGGTAAGATTACAAAACCTGGT  
ACTATATAAGGTTTTGCTATTCATTGAAAGCAGTAGTGACTGATTTGTATATA

>MinSyn\_1641|Strength:0.001262996

GCGTGTGTTTTAGTGAGGATGACGTAAGCCATGACGTCTAATTAGGTTGTCTGCACCTCACTTTTCA  
ACAAGTGTACAGGGCTCACTGCTAGGAGAAGATTGATGAAAAGTCAAAAAACAAAAATCAATTATTACT  
TGTGTACAGGGCTCACTGCTAGCACACCAGCATGTGTTGATCACCAGCTGCCTGCCTTCCATCAACAA  
ATAATCCAAGTAAGCCTCTACAAAACCTGGTACTTGAAGATAAGATAATAATGTTGAAGATAAGAGGTA  
GGTCACGACCACTATCGAAAGGACAGTATGTGTACAGGGCTCACTGCGGAAAAAGAAGAGGTACTATG  
ATTGCGATAAAGGAAAGGCTACAAAACCTGGTACTTGTCTATATAAGGTTTTGCTATTCATTGAAAGCAG  
TAGTGACTGATTTGTATATA

>MinSyn\_1571|Strength:0.001263076

GCGTGTGTTTTAGTGAGGGCTTTGTCAAAAAGCTAAAAAAGATGATGCCCCAGCACACCAGCATGTGT  
TGATCACCAGCTTAGGTCACGACCACCAGCCACTTGTGTATCAGTCCATCAACAAATAATCCAAGTAA  
GCCTCATCACTATCAGCGGACCGATGCTGATCTTGCTATATAAGGTTTTGCTATTCATTGAAAGCAG  
TAGTGACTGATTTGTATATA

>MinSyn\_1365|Strength:0.001266062

GCGTGTGTTTTAGTGAGGTGGTGGAGCACGACATAGTTATGACCCCGCCGATGACGCGGGAGAGGA  
CCGATGCTGATCTTGCCATCGAAAGGACAGTATCTACATCCATCAACAAATAATCCAAGTAAGCGCG  
TAGGTCACGACCACTATGCCCTATATAAGGTTTTGCTATTCATTGAAAGCAGTAGTGACTGATTTGT  
ATATA

>MinSyn\_1657|Strength:0.001269417

GCGTGTGTTTTAGTGAGGGTGGGAGCCACCCTGATCTTGCTGCCTTGATGATCAGAAGATCAAAG  
GGCTAATCAGCTTAGCAAGACGGAAAAAGAAGAGGTCCACTATGCCCAATTAGGTTGTCTGCAGCAAG  
TGGATTGGTACTTGTGTAAAGATTGATGAAAAGTCAAAAAACAAAAATCAATTATCTATCAGCTTAGCT  
CTCTCTGCCGACAGTGGTCCCAAATATTGCGATAAAGGAAAGGCCCAATTAGGTTGTCTGCACACCAG  
CATGTGTTGATCACCAGCTTCACTGCTAGGAGGACCGTGAAGCATCTTCCTGCTGATCTTGCTGCC

TATATAAGGTTTTGCTATTCATTGAAAGCAGTAGTGACTGATTTGTATATA  
>MinSyn\_1541|Strength:0.001269606  
GCGTGTTCGTTTTAGTGAGGAAAAATGTCAAAGATAGGGCTCTGAAGATAAGATAATAATGTTGAAGAT  
AAGACTCACTCCATCAACAAATAATCCAAGTAAGGTACAGGGCTCACTGAAGATTGATGAAAAGTCAA  
AAACAAAAATCAATTATCAATTAAGCAAGTGGATAGCTTAGCAAGACCTCTACAACTATATAAGGTT  
TTGCTATTCATTGAAAGCAGTAGTGACTGATTTGTATATA  
>MinSyn\_1337|Strength:0.001270212  
GCGTGTTCGTTTTAGTGAGGCAAATATTTCTTGTACTATGCCAATCAGAAGATCAAAGGGCTACACCT  
CACATCCTTACCGCTATGGGTAAGATTTTGTCTGCACCTCACAGGTGGCTCCTACTGGTAAACCATTA  
TTGCGTCTACAAAACCTGGTACTTGTGTACTGAAGATAAGATAATAATGTTGAAGATAAGAGGGCTCAC  
TGCTTTTTCAACAAATCTTGCCTAATTTCCGGAAACCTCCTCGCAGCTTAGCAAGACCTCCTATATAA  
GGTTTTGCTATTCATTGAAAGCAGTAGTGACTGATTTGTATATA  
>MinSyn\_1837|Strength:0.001271311  
GCGTGTTCGTTTTAGTGAGGATTGCGATAAAGGAAAGGCCAATTAGGTGGGAGCCACCAAGGAGGACCG  
ATCTATATAAGGTTTTGCTATTCATTGAAAGCAGTAGTGACTGATTTGTATATA  
>MinSyn\_1891|Strength:0.001272347  
GCGTGTTCGTTTTAGTGAGGAACCACGTCTACAACACCTCACATGTAGGCTATCAGCTGTGGGAGCCAC  
CACACCTCACATGTAGGCTATCAGCTTTCTCTCTGCCGACAGTGGTCCCAAATCTTGCCTAAAAATGT  
CAAAGATAAACTGGTACTTGTGTACAGGGCTGCTTTGTCAAAGCTAAAAAAGATGATGCTAGCACAC  
CAGCATGTGTTGATCACCAGCTCTGCACCTCACATGTAATCCTTACCGCTATGGGTAAGATTAGCTTA  
GCAAGACTGAAGATAAGATAATAATGTTGAAGATAAGATACTTGTCTATATAAGGTTTTGCTATTCAT  
TGAAAGCAGTAGTGACTGATTTGTATATA  
>MinSyn\_1863|Strength:0.001273701  
GCGTGTTCGTTTTAGTGAGGTGGTGGAGCACGACAGGCTATCAGCTTAGCAAGACAAGATTGATGAAAA  
GTCAAAAAACAAAATCAATTATACATGTAGTCTCTCTGCCGACAGTGGTCCCAAATATTAGGTTGTCT  
GCACCTCACATGTCCATCAACAAATAATCCAAGTAAGGATCTTGCCTGCCTATATAAGGTTTTGCTAT  
TCATTGAAAGCAGTAGTGACTGATTTGTATATA  
>MinSyn\_1335|Strength:0.001275725  
GCGTGTTCGTTTTAGTGAGGTCACTATCAGCTCTGCACCTCAAACCACGTCTACAACCTATCCATCAACA  
ATAATCCAAGTAAGCACTGCTAGGAGGACCGATGCTGATCTTCTATATAAGGTTTTGCTATTCATTG  
AAAGCAGTAGTGACTGATTTGTATATA  
>MinSyn\_1008|Strength:0.001277468  
GCGTGTTCGTTTTAGTGAGGATCGAAAGGACAGTAAGACCTCTACAAAACCTGGTACTTGGAAAAAGAAG  
AGGTCTTAGCAAGACCTCTACAAAACCTGGTACTCAGAAGATCAAAGGGCTATGCCAATTAGGTTGTCT  
TGCATTATGACCCCGCCGATGACGCGGGAAGTGGGAGCCACCAACAAAACCTGAACCATTATTGCGAA  
CTGGTACTTGTGTACAGGGCTCCATCAACAAATAATCCAAGTAAGCGGTAGCTATATAAGGTTTTGCT  
ATTCATTGAAAGCAGTAGTGACTGATTTGTATATA  
>MinSyn\_1892|Strength:0.001279776  
GCGTGTTCGTTTTAGTGAGGATCGAAAGGACAGTATAGGTTGTCTGAGGTGGCTCCTACTGGTACTTGT  
GTGCACACCAGCATGTGTTGATCACCAGCTTGGTACTTGTGTAAGATTGATGAAAAGTCAAAAACAAA  
AATCAATTATTCGCGGTAGGTCACGACCACTATGCCCTATATAAGGTTTTGCTATTCATTGAAAGCA  
GTAGTGACTGATTTGTATATA  
>MinSyn\_1556|Strength:0.00128026  
GCGTGTTCGTTTTAGTGAGGGTGGGAGCCACCAGGTAACCAATTATTGCGAAGACAGCAAGTGGATC  
ACTATTGCGATAAAGGAAAGGAATCCTTACCGCTATGGGTAAGATTACTATGCCAATTAGGTTGTCT  
GCACCTATATAAGGTTTTGCTATTCATTGAAAGCAGTAGTGACTGATTTGTATATA  
>MinSyn\_1372|Strength:0.001280806  
GCGTGTTCGTTTTAGTGAGGGTGGGAGCCACCAATCAGCTTAGCATCACTATCAGCGCTGATCTAAGAT  
TGATGAAAAGTCAAAAACAAAATCAATTATTATTTCAACAAAGGCTATCAGCTTAGCAGGTGGCTC  
CTACACTATGCCAATTAGGTTGAGTGGTCCCTCCACCATGTAGGCTATCAATCCTTACCGCTATGGG  
TAAGATTGCCCAATTAGGTTGTCTATATAAGGTTTTGCTATTCATTGAAAGCAGTAGTGACTGATTT  
GTATATA  
>MinSyn\_1310|Strength:0.001281282  
GCGTGTTCGTTTTAGTGAGGAACCACGTCTACAACCTCTCTCTGCCGACAGTGGTCCCAAACCTGGTACT

TGTGTACAGGGCTGTGGGAGCCACCAATGAAAAATGTCAAAGATATCTGCACCTCCTATATAAGGTTT  
TGCTATTCATTGAAAGCAGTAGTGACTGATTTGTATATA  
>MinSyn\_1397|Strength:0.001285156  
GCGTGTTCGTTTTAGTGAGGATTGCGATAAAGGAAAGGCTCTACAAAAGTGGTACTTGTGCAGTGGTCC  
CTCCACGTCTATATAAGGTTTTGCTATTCATTGAAAGCAGTAGTGACTGATTTGTATATA  
>MinSyn\_1543|Strength:0.001285156  
GCGTGTTCGTTTTAGTGAGGGGAAAAGAAGAGGTGCACCTCACATTGCGATAAAGGAAAGGTTGTCTG  
CACCTCACCTATATAAGGTTTTGCTATTCATTGAAAGCAGTAGTGACTGATTTGTATATA  
>MinSyn\_1592|Strength:0.001285786  
GCGTGTTCGTTTTAGTGAGGTGAAGCATCTCCGCTAGGAGGACTTATGACCCCCGCCGATGACGCGGG  
AATGCTGATCTTGCCTGCCTTGATGATATTGCGATAAAGGAAAGGTTATCACTATCAGCGGCTCACTG  
CTAGGAGGACCGAACCATTTGCGTGCCTATATAAGGTTTTGCTATTCATTGAAAGCAGTAGTGACT  
GATTTGTATATA  
>MinSyn\_1424|Strength:0.001285875  
GCGTGTTCGTTTTAGTGAGGGTGGGAGCCACCACTATGCCCAATTAGGTTGTCTGCACCTCAGCAAGTG  
GATAATCCTTACCGCTATGGGTAAGATTAGGAGGACCGATGCTGATCTTGCAGCCACTTGTGTACAAA  
ACTGGTACTTGGGAAAAAGAAGAGGTTTGTGTACAGGGCTCTCCATCAACAAATAATCCAAGTAAGAG  
GAGGAATCGAAAGGACAGTAAGGCTATCAGCTTAAAGATTGATGAAAAGTCAAAAACAAAAATCAATT  
ATCCTGCCTAAAAATGTCAAAGATATAGGAGGACCGATGCTGATCTTGCCTGCCCTATATAAGGTTTT  
GCTATTCATTGAAAGCAGTAGTGACTGATTTGTATATA  
>MinSyn\_1991|Strength:0.001287024  
GCGTGTTCGTTTTAGTGAGGATCGAAAGGACAGTAACAAAAGTGGTACTTGTGTACAGGCAGTGGTCCC  
TCCACCTGCATCCTTACCGCTATGGGTAAGATTACTGCTAGGAGGACCTATATAAGGTTTTGCTATTC  
ATTGAAAGCAGTAGTGACTGATTTGTATATA  
>MinSyn\_1513|Strength:0.001287468  
GCGTGTTCGTTTTAGTGAGGGTGGGAGCCACCATTGACAAATATTTCTTGTAGGCTATCAGCTTAGCAA  
GACCTCTTCAGAAGATCAAAGGGCTAACCACTATGCCCAAACCAATTATTGCGTCAGCTTAGCAAGAC  
CTAGGTGGCTCCTACGCTATATAAGGTTTTGCTATTCATTGAAAGCAGTAGTGACTGATTTGTATATA  
>MinSyn\_1324|Strength:0.001290833  
GCGTGTTCGTTTTAGTGAGGTCAGAAGATCAAAGGGCTAACAGGGCTAGGTGGCTCCTACATTAGGTTG  
TCTGCACCTCTGAAGCATCTTCTTAGGAGGACCGATGAACCATTATTGCGTGTCTGATCTTGCCTGCCA  
AAAATGTCAAAGATAAGTCTCTCTGCCGACAGTGGTCCCAAATAGGTTGTCTGCACCTCCATCAACAA  
ATAATCCAAGTAAGCACTATGCCCAATTAGGTTGTCTGCTGGTGGAGCACGACAAGGCTCTATATAAG  
GTTTTGCTATTCATTGAAAGCAGTAGTGACTGATTTGTATATA  
>MinSyn\_1622|Strength:0.0012925  
GCGTGTTCGTTTTAGTGAGGATTGCGATAAAGGAAAGGGCAAGTGGGAGCCACCATATCAGCTTAGCAA  
CTATATAAGGTTTTGCTATTCATTGAAAGCAGTAGTGACTGATTTGTATATA  
>MinSyn\_1032|Strength:0.001293426  
GCGTGTTCGTTTTAGTGAGGAATTTCCGGAAACCTCCTCGCTCTACAAAAGTGGTACTTGTGTACTGAA  
GCATCTTCTCTACAAAATTGCGATAAAGGAAAGGCTGCTAGGAGGACCGATTTATGACCCCCGCCGA  
TGACGCGGGACACTGCTAGGAGGACCGATGAAGATAAGATAATAATGTTGAAGATAAGAGCCCAATCC  
ATCAACAAATAATCCAAGTAAGAGGAGGACCGATGCTGATCTTGCACACCAGCATGTGTTGATCACCA  
GCTTAGCAAGACCTCTACAAAAGTCTATATAAGGTTTTGCTATTCATTGAAAGCAGTAGTGACTGAT  
TTGTATATA  
>MinSyn\_1644|Strength:0.001294564  
GCGTGTTCGTTTTAGTGAGGTTTTCAACAATGTACAGGGCTCACTGCTATCCATCAACAAATAATCCAA  
GTAAGGCTGCACCTCACATGTAAAAATGTCAAAGATAAGACAACCATTATTGCGAGGCTATCAGCTT  
AGCAAGACCTCAGCCACTTGTGTACCTCTACAAAAGTGGTAGGTGGCTCCTACCACGACCACTATGCC  
CAATTAAGATTGATGAAAAGTCAAAAACAAAAATCAATTATCCTCTACAAAAGTGGTACTTGTGTAC  
ATGAAGATAAGATAATAATGTTGAAGATAAGATAGGATCCTTACCGCTATGGGTAAGATTCACCTCAC  
ATGTAGGCTATCAGCTCTATATAAGGTTTTGCTATTCATTGAAAGCAGTAGTGACTGATTTGTATATA  
>MinSyn\_1546|Strength:0.001296145  
GCGTGTTCGTTTTAGTGAGGTTTTCAACAATGTAGGCTATCAGCTTAGCAAGACCTCTCTCTGCCGAC  
AGTGGTCCCAAACCACTAAAGATTGATGAAAAGTCAAAAACAAAAATCAATTATGCTGATCTTGCCT

GCCTTGACTATATAAGGTTTTGCTATTCATTGAAAGCAGTAGTGACTGATTTGTATATA  
>MinSyn\_1234|Strength:0.001296597  
GCGTGTTCGTTTTAGTGAGGAGGTGGCTCCTACACATGGAAAAAGAAGAGGTGCTATCAGCTTAGCAAG  
TGGGAGCCACCAAAGTGGTATGAAGATAAGATAATAATGTTGAAGATAAGATCACGAAGCAAGTGGAT  
TAAAAATGTCAAAGATATAGGAGGACCGATGCTGATCTTCTATATAAGGTTTTGCTATTCATTGAAAG  
CAGTAGTGACTGATTTGTATATA  
>MinSyn\_1217|Strength:0.0012971  
GCGTGTTCGTTTTAGTGAGGAAAAATGTCAAAGATACTAGGAGGACCGATGCTGAAGATTGATGAAAAG  
TCAAAAACAAAAATCAATTATTAGGTACGACCACCTATATAAGGTTTTGCTATTCATTGAAAGCAGT  
AGTGACTGATTTGTATATA  
>MinSyn\_1525|Strength:0.001299025  
GCGTGTTCGTTTTAGTGAGGTCAGAAGATCAAAGGGCTAGGACCGATGCTGATCGGAAAAAGAAGAGGT  
GTTATGACCCCGCCGATGACGCGGGACTCTACAAAACCCATCAACAAATAATCCAAGTAAGTACAG  
GGCTCACTGCTAGGAAAGATTGATGAAAAGTCAAAAACAAAAATCAATTATGGACCGATGCTGATCTT  
GCCTGCCTTGATGTGAAGATAAGATAATAATGTTGAAGATAAGAACTATGCCCAATTAGGTCTATATA  
AGGTTTTGCTATTCATTGAAAGCAGTAGTGACTGATTTGTATATA  
>MinSyn\_1907|Strength:0.001299065  
GCGTGTTCGTTTTAGTGAGGCAAATATTTCTTGTGAGGACCGATGCTGATCTTGTCCATCAACAAATAA  
TCCAAGTAAGGATGCTGATCTTGCCTGCCTTGATGAACCATTATTGCGATGAAGATTGATGAAAAGTC  
AAAAACAAAAATCAATTATCCTCTACAAAACGGTACTTTATGACCCCGCCGATGACGCGGGATATG  
CCCAATTAGGTTGTCTGCACCTCACAGTGGTCCCTCCACCAGGGCTCACTGCTAGGAGGACCGATGCT  
GAAGATAAGATAATAATGTTGAAGATAAGATCACTGCTATCCTTACCGCTATGGGTAAGATTACCTCA  
CATGTAGGCTATCAGCTTAGCATTGCGATAAAGGAAAGGTACTATATAAGGTTTTGCTATTCATTGAA  
AGCAGTAGTGACTGATTTGTATATA  
>MinSyn\_1120|Strength:0.001306601  
GCGTGTTCGTTTTAGTGAGGTTATGACCCCGCCGATGACGCGGGAGTTGTCTGCACCTCACATGTAGG  
CTATCAGTCTCTCTGCCGACAGTGGTCCCAAATCGCGGTAGGTCATCCATCAACAAATAATCCAAGTA  
AGGTACAGGGCTCACTGCTAACCATTATTGCGTGTGCTGATCTATCCTTACCGCTATGGGTAAGATTTG  
CCTGCCTTGATGAAAGATTGATGAAAAGTCAAAAACAAAAATCAATTATATCTTGCCTGCCTTGAGCA  
CACCAGCATGTGTTGATCACCAGCTGACCACTATGCCCAATTAGGTTGTCTATATAAGGTTTTGCTA  
TTCATTGAAAGCAGTAGTGACTGATTTGTATATA  
>MinSyn\_1981|Strength:0.00130703  
GCGTGTTCGTTTTAGTGAGGTTCTCTGCCGACAGTGGTCCCAAATAAGATTGATGAAAAGTCAAAAAC  
AAAAATCAATTATAACTGGTACTTGTGTACAGGGCTCTGAAGATAAGATAATAATGTTGAAGATAAGA  
GTGTATTATGACCCCGCCGATGACGCGGGAGACCTCTACAAAACGGTACTTGTGTACAAAAATGTC  
AAAGATAATGTAGGCTATCAGTGGGAGCCACCAGTAGGTCACGACTATATAAGGTTTTGCTATTCATT  
GAAAGCAGTAGTGACTGATTTGTATATA  
>MinSyn\_1345|Strength:0.001307826  
GCGTGTTCGTTTTAGTGAGGGGAAAAAGAAGAGGTTGTGTACAGGATCGAAAGGACAGTACCAACTATA  
TAAGGTTTTGCTATTCATTGAAAGCAGTAGTGACTGATTTGTATATA  
>MinSyn\_1519|Strength:0.001308464  
GCGTGTTCGTTTTAGTGAGGGGAAAAAGAAGAGGTGTGTACAGGGCTCACTGCTAGGAGGTTTTCAACA  
ATTGTGTACAGTCCATCAACAAATAATCCAAGTAAGAGACCCAAATATTTCTTGTCTTGCCTGCTATA  
TAAGGTTTTGCTATTCATTGAAAGCAGTAGTGACTGATTTGTATATA  
>MinSyn\_1895|Strength:0.001308707  
GCGTGTTCGTTTTAGTGAGGTTTTCAACAAGGCTCACTGCTAAATTTGGGAAACCTCCTCGATTCCAT  
CAACAAATAATCCAAGTAAGCTGGTACTTGTGTACAGGCACACCAGCATGTGTTGATCACCAGCTATG  
CTGATCTTGCCTGCCTTGATGAAGCATCTCCGCCTGCCTTGATCTATATAAGGTTTTGCTATTCATT  
GAAAGCAGTAGTGACTGATTTGTATATA  
>MinSyn\_1910|Strength:0.001309498  
GCGTGTTCGTTTTAGTGAGGAAGATTGATGAAAAGTCAAAAACAAAAATCAATTATGCTGATCTTGCCT  
GCCTTGATGATAAATTTGGGAAACCTCCTCGGCTGATCTTGCCTGCCTTGATGTGAAGATAAGATAA  
TAATGTTGAAGATAAGATTGCAGTGGTCCCTCCACATTAGGTTGTCTGCACCTCACATGTCTATATAA  
GGTTTTGCTATTCATTGAAAGCAGTAGTGACTGATTTGTATATA



>MinSyn\_1481|Strength:0.001314328  
GCGTGTTCGTTTTAGTGAGGAAAAATGTCAAAGATAGGAGGACCGATGCTGATCTTGCCCTAACCCACGTC  
TACAAAGGAGGACCGATGCTGATCTTGCCTTTTTCAACAAGTACAGTTATGACCCCCGCCGATGACGC  
GGGATGTAGGCTATCAGCTTAGCATGAAGCATCTTCCAAAACCTGGTATGGTGGAGCACGACAGATGCT  
GATCTTGCCCTGCCTTGATGAACCATTATTGCGCAAGACCTCTACAAAACCTGGTACTTCTCTCTGCCGA  
CAGTGGTCCCAAAGTTGAAGATAAGATAATAATGTTGAAGATAAGACCTCACATCTATATAAGGTTTT  
GCTATTCATTGAAAGCAGTAGTGACTGATTTGTATATA

>MinSyn\_1623|Strength:0.001314331  
GCGTGTTCGTTTTAGTGAGGGCACACCAGCATGTGTTGATCACCAGCTCGCGGTAGGTCACGATCCTTA  
CCGCTATGGGTAAGATTGGTACGGTGGGAGCCACCAACTGCTAGGAGGACCAAAAATGTCAAAGATA  
TATCAGCTCCATCAACAAATAATCCAAGTAAGAGGTCTGAAGCATCTTCCATTAGGTTGTCTGCACCT  
CACATGAACCAGTCTACAATACAGGGCTCAAATATTTCTTGCCAATTAGCTATATAAGGTTTTGCT  
ATTCATTGAAAGCAGTAGTGACTGATTTGTATATA

>MinSyn\_1572|Strength:0.001314334  
GCGTGTTCGTTTTAGTGAGGTCAGAAGATCAAAGGGCTAATGTAGGCTATCAGCTTAGCAAGACCATTG  
CGATAAAGGAAAGGATGCCCAATTAGGTTGTCTGCACCTCACATCTCTCTGCCGACAGTGGTCCCAA  
AGGACCGATGCTGATCCATCAACAAATAATCCAAGTAAGCTATCCTATATAAGGTTTTGCTATTCATT  
GAAAGCAGTAGTGACTGATTTGTATATA

>MinSyn\_1585|Strength:0.001316878  
GCGTGTTCGTTTTAGTGAGGAACCATTATTGCGGACCGATGCTGATCTTCACTATCAGCTGCACCTCAC  
ATGTAGCAAATATTTCTTGCTAGGCAGCCACTTGTGTCTCTATATAAGGTTTTGCTATTCATTGAA  
AGCAGTAGTGACTGATTTGTATATA

>MinSyn\_1680|Strength:0.001317221  
GCGTGTTCGTTTTAGTGAGGATCGAAAGGACAGTAGTCTGCACCTCACATGTAGGTCTCTCTGCCGACA  
GTGGTCCCAAATCAGCTTAGCAAGACCTCTACAAAACCTAGGTGGCTCCTACTGCTGATCTTGCCCTGCC  
TTGATAACCACGTCTACAATTAGCAAGACCTCTACAGGAAAAAGAAGAGGTCTATGCCCAATTAGGTT  
GTCTGCACCTCACTGAAGATAAGATAATAATGTTGAAGATAAGACTTGCAAATATTTCTTGTTGGGCTC  
ACTGCATTGCGATAAAGGAAAGGACAGGGCTCACTGCACACCAGCATGTGTTGATCACCAGCTATCAG  
CTTCTATATAAGGTTTTGCTATTCATTGAAAGCAGTAGTGACTGATTTGTATATA

>MinSyn\_1743|Strength:0.001318078  
GCGTGTTCGTTTTAGTGAGGTCAGAAGATCAAAGGGCTACTATCAGCTTAGCAAGACCTCTACAAAACC  
ACGCTTACAACACTATGCCCAATTAGGTTGTCTGCACCTCCATCAACAAATAATCCAAGTAAGTGTGT  
ACAGGTGAAGCATCTTCTGCCTTGATGCAGCCACTTGTGTTGCTATATAAGGTTTTGCTATTCATTG  
AAAGCAGTAGTGACTGATTTGTATATA

>MinSyn\_1570|Strength:0.001318705  
GCGTGTTCGTTTTAGTGAGGGTGGGAGCCACCATGTCTGCACCTCACATATCCTTACCGCTATGGGTAA  
GATTATGCCCAATTAGGTTCTATATAAGGTTTTGCTATTCATTGAAAGCAGTAGTGACTGATTTGTAT  
ATA

>MinSyn\_1201|Strength:0.001320226  
GCGTGTTCGTTTTAGTGAGGAACCACGTCTACAAGCCTGCCTTGATGATAATCGAAAGGACAGTACTCT  
ACAAAATGAAGATAAGATAATAATGTTGAAGATAAGAAGACCTCTTGAAGCATCTTCTCACTGCTAA  
ATTTCCGGGAAACCTCCTCGGCCCAATTAGGTTGTCTGCTATATAAGGTTTTGCTATTCATTGAAAGCA  
GTAGTGACTGATTTGTATATA

>MinSyn\_1102|Strength:0.001325641  
GCGTGTTCGTTTTAGTGAGGCAGCCACTTGTGTAATTGCGATAAAGGAAAGGTGTCTGCACCTCACCTA  
TATAAGGTTTTGCTATTCATTGAAAGCAGTAGTGACTGATTTGTATATA

>MinSyn\_1995|Strength:0.001325765  
GCGTGTTCGTTTTAGTGAGGCAGCCACTTGTGTCAGTCTAGGAGGTGGCTCCTACAATCACTATCAGC  
ACTCTCTCTGCCGACAGTGGTCCCAAAGCTAGGAAGCAAGTGGATCACTGCCTATATAAGGTTTTGCT  
ATTCATTGAAAGCAGTAGTGACTGATTTGTATATA

>MinSyn\_1349|Strength:0.001326771  
GCGTGTTCGTTTTAGTGAGGTGGTGGAGCACGACACGATGCTTTTTCAACAAGCTATCAGGGAAAAAGAA  
GAGGTTACTTGTGTACACAAATATTTCTTGATGCTTCTCTCTGCCGACAGTGGTCCCAAAGTTGTC  
TGCACCTCACATGTGGGAGCCACCATCTACAAAACCTGGTACTTGTGTACAGGGCAAAAATGTCAAAGA

TACTGCCTATCCTTACCGCTATGGGTAAGATTCCCTATATAAGGTTTTGCTATTCATTGAAAGCAGTAG  
TGACTGATTTGTATATA

>MinSyn\_1736|Strength:0.001337891

GCGTGTTCGTTTTAGTGAGGCAAATATTTCTTGAGCAAGATTGATGAAAAGTCAAAAACAAAAATCAA  
TTATCAGGGCTCACTGCTAGGAGGACCGATTTTCAACAAACCGATGCTGATCTTGCCTGCCTCTATAT  
AAGGTTTTGCTATTCATTGAAAGCAGTAGTGACTGATTTGTATATA

>MinSyn\_1882|Strength:0.001338194

GCGTGTTCGTTTTAGTGAGGTCTCTCTGCCGACAGTGGTCCCAAAGGTTGTCTGCACCTAACCCACGTCT  
ACAATCTGCACCTCACATGTAGGCCTATATAAGGTTTTGCTATTCATTGAAAGCAGTAGTGACTGATT  
TGTATATA

>MinSyn\_1850|Strength:0.001339636

GCGTGTTCGTTTTAGTGAGGTGAAGCATCTCCATCTTGCCTGCCTTGATATCCTTACCGCTATGGGTA  
AGATTCTTGCCTGCCTTGATGATGAAGATAAGATAATAATGTTGAAGATAAGACATGTAGGCTATCAG  
CTTTGGTGGAGCACGACAGACCTCTACAAAATTTTCAACAAGGTCACGACCATCTCTCTGCCGACAG  
TGGTCCCAAACCTGCTATATAAGGTTTTGCTATTCATTGAAAGCAGTAGTGACTGATTTGTATATA

>MinSyn\_1527|Strength:0.001340654

GCGTGTTCGTTTTAGTGAGGGGAAAAGAAGAGGTTACTTGTGTAGGTGGCTCCTACGTCTCTCTGCCG  
ACAGTGGTCCCAAAGGGCTCACTGCTAGGAGGTGGGAGCCACCCTTAGCAAGACCTCTACAAAAT  
GGTAAGATTGATGAAAAGTCAAAAACAAAAATCAATTATTGCACCTCACATGTAGGAAAAATGTCAA  
GATAGGTACTTGTGACTCCATCAACAAATAATCCAAGTAAGGTTATGACCCCGCCGATGACGCGGG  
AAGGGCTCACTGCTAGGAGGACCGATGCTCAGTGGTCCCTCCACCCTGCTAGGAGCTATATAAGGTT  
TTGCTATTCATTGAAAGCAGTAGTGACTGATTTGTATATA

>MinSyn\_1259|Strength:0.001349365

GCGTGTTCGTTTTAGTGAGGTCACTATCAGCCAAAATGGTACTATTGCGATAAAGGAAAGGGGTAGGT  
CACGACCACTATGCCCAAGCACACCAGCATGTGTTGATCACCAGCTCATCGAAAGGACAGTAAGCAAG  
ACCTCTCTATATAAGGTTTTGCTATTCATTGAAAGCAGTAGTGACTGATTTGTATATA

>MinSyn\_1672|Strength:0.00135362

GCGTGTTCGTTTTAGTGAGGAAAATGTCAAAGATATATCAGCTTAGCAAGACCTCTACAAAATGAAGA  
TAAGATAATAATGTTGAAGATAAGAAGCTTAGTCAGAAGATCAAAGGGCTAGGGCTCACTGCTAGGAG  
GACCGATCTATATAAGGTTTTGCTATTCATTGAAAGCAGTAGTGACTGATTTGTATATA

>MinSyn\_1539|Strength:0.001356504

GCGTGTTCGTTTTAGTGAGGGCTTTGTCAAAGCTAAAAAGATGATGCCACCTCACATGTAGGCTATG  
TGGGAGCCACCAACTGCTATCGAAAGGACAGTATGCACCTGAAAAAGAAGAGGTTGGTACTTGTGTA  
CATGAAGATAAGATAATAATGTTGAAGATAAGACTTGCCTGTCTCTCTGCCGACAGTGGTCCCAAATA  
CATCCTTACCGCTATGGGTAAGATTACTTGTGTACAGGGCTCACTGCTAGTGAAGCATCTTCTTGTAT  
GATACTATATAAGGTTTTGCTATTCATTGAAAGCAGTAGTGACTGATTTGTATATA

>MinSyn\_1318|Strength:0.001359504

GCGTGTTCGTTTTAGTGAGGAACCATTATTGCGGTACAGGGAATTTCCGGAAACCTCCTCGGCTGATCT  
TCTATATAAGGTTTTGCTATTCATTGAAAGCAGTAGTGACTGATTTGTATATA

>MinSyn\_1009|Strength:0.001360771

GCGTGTTCGTTTTAGTGAGGTCTCTCTGCCGACAGTGGTCCCAAACACCTCACATGTATCGAAAGGACA  
GTATGCCCAATTAGGTATTGCGATAAAGGAAAGGATTAGGTTGTCAAAAATGTCAAAGATAATTCTAT  
ATAAGGTTTTGCTATTCATTGAAAGCAGTAGTGACTGATTTGTATATA

>MinSyn\_1399|Strength:0.001363436

GCGTGTTCGTTTTAGTGAGGTTTTCAACAAGTCACGACCCAAATATTTCTTGTCCCAATTAGAAGATTG  
ATGAAAAGTCAAAAACAAAAATCAATTATCTGCCTTGATGAAGATAAGATAATAATGTTGAAGATAAG  
AATCAGCTTAGCAAGACCTCTAAACCACGTCTACAACCTCACACAGCCACTTGTGTGAGGGCT  
CACTGCTAGGAGGACCGTTATGACCCCGCCGATGACGCGGGAATGCTATATAAGGTTTTGCTATTC  
TTGAAAGCAGTAGTGACTGATTTGTATATA

>MinSyn\_1384|Strength:0.001363626

GCGTGTTCGTTTTAGTGAGGATCCTTACCGCTATGGGTAAGATTTGCACCTCACATGTAGGCTATCAA  
AAATGTCAAAGATAGTCTGCACCTCACACAAATATTTCTTGTACTATGCCCAATTCAGCCACTTGTGT  
TGCCTTATGACCCCGCCGATGACGCGGGAACAAAATGGTACTTGTGTAAATTTCCGGAAACCTCCT  
CGATCTTGCCTGCCTATTGCGATAAAGGAAAGGACTATATAAGGTTTTGCTATTCATTGAAAGCAGTA

GTGACTGATTTGTATATA

>MinSyn\_1881|Strength:0.001365307

GCGTGTCTGTTTTAGTGAGGATCGAAAGGACAGTATCTGCACCTCACATGTAGGCTATCAGTGGTGGAG  
CACGACATTGTCTGCACCTCACATCAGCCACTTGTGTAATTAGGTTGTTGAAGCATCTTCCTATCAGC  
TTAGCAAGACCTCTACAACCATTATTGCGGCCTGCCTTGATGATAAATTTTCGGGAAACCTCCTCGTAG  
CAAGACAAGATTGATGAAAAGTCAAAAACAAAATCAATTATTCACTATATAAGTTTTGCTATTCAT  
TGAAAGCAGTAGTGACTGATTTGTATATA

>MinSyn\_1239|Strength:0.001368524

GCGTGTCTGTTTTAGTGAGGGTGGGAGCCACCATCTGCACCTCACATGTAGGCTATCATCGAAAGGACA  
GTAGTTGTCTGCACCTCAAATTTTCGGGAAACCTCCTCGCTCACATGTAGGTGAAGCATCTTCGGGCTA  
TCACAGCCACTTGTGTCTGCTAGGAGGCAGTGGTCCCTCCACTATTGCGATAAAGGAAAGGCGATGCT  
GATCTTGCCTTCACTATCAGCGACTATATAAGTTTTGCTATTCATTGAAAGCAGTAGTGACTGATTT  
GTATATA

>MinSyn\_1126|Strength:0.001372878

GCGTGTCTGTTTTAGTGAGGTGAAGATAAGATAATAATGTTGAAGATAAGAAGGAGGACCGATAAAAAT  
GTCAAAGATACTACAAAACCTGGTACTTGTGGCACACCAGCATGTGTTGATCACCAGCTTGCTAGTCCA  
TCAACAAATAATCCAAGTAAGAGGAGGACCGATGCTGATCTTGCAAGATTGATGAAAAGTCAAAAACA  
AAAATCAATTATTTAGGTTGTCTGCACCCTATATAAGGTTTTGCTATTCATTGAAAGCAGTAGTGACT  
GATTTGTATATA

>MinSyn\_1317|Strength:0.001375497

GCGTGTCTGTTTTAGTGAGGTGAAGCATCTTCCCTTAGCAAGACCTCTACAAAACCTGGTACTTATGACC  
CCC GCCGATGACGCGGAAGCTTAGCAAGACCTCTACAAAATTTTCGGGAAACCTCCTCGGAGGACCT  
TTTCAACAATATCAGCTTAGCAAGACCTCTACAGCCACTTGTGTATCTTGCTGAAGATAAGATAATAA  
TGTTGAAGATAAGATAGGTCACGACCACTATGCAAATATTTCTTGTGCTTAGCAAGGCACACCAGCAT  
GTGTTGATCACCAGCTGGCTCTATATAAGGTTTTGCTATTCATTGAAAGCAGTAGTGACTGATTTGTA  
TATA

>MinSyn\_1534|Strength:0.001376174

GCGTGTCTGTTTTAGTGAGGGTGGGAGCCACCAAGGTACGACCACTATGCCCAATTAACCATTATTGC  
GCCTGCCTTGATGATATTATGACCCCCGCCGATGACGCGGAATGCTGATCTTGCCTGCCTTGCACAC  
CAGCATGTGTTGATCACCAGCTCACATGTAGGCTATATAAGGTTTTGCTATTCATTGAAAGCAGTAGT  
GACTGATTTGTATATA

>MinSyn\_1789|Strength:0.001376429

GCGTGTCTGTTTTAGTGAGGAACCATTATTGCGGAAACCACGTCTACAACCTCACATGTTCACTATCAGC  
CTTAGCAAGACCTCTACAACCTATATAAGGTTTTGCTATTCATTGAAAGCAGTAGTGACTGATTTGTA  
TATA

>MinSyn\_1346|Strength:0.001377545

GCGTGTCTGTTTTAGTGAGGGTGGGAGCCACCAGGAGGACCGCAGCCACTTGTGTCTGCGGTAGGTCAG  
AAACCATTATTGCGAGACCTCTACAGTGGTCCCTCCACATTATGACCCCCGCCGATGACGCGGGATAC  
TTGTGTACAAACCACGTCTACAACAAAACCTGGTACTTGTGTACAGGGCTTGGTGGAGCACGACAGACC  
ACTATCCTTACCCTATGGGTAAGATTGCTTCCATCAACAAATAATCCAAGTAAGAGCTTAGCAAGAC  
CTCTACAAAACCTATATAAGTTTTGCTATTCATTGAAAGCAGTAGTGACTGATTTGTATATA

>MinSyn\_1828|Strength:0.001378694

GCGTGTCTGTTTTAGTGAGGTGGTGGAGCACGACATGTGTACAGGGTCCATCAACAAATAATCCAAGTA  
AGGCTGCCTTCAGAAGATCAAAGGGCTACCGATGCTGATCTAAGATTGATGAAAAGTCAAAAACAAA  
AATCAATTATCAGCTTAGCCAAATATTTCTTGTCACTATGCCCAATTAGGTTGTCTGCACCTCCTATA  
TAAGGTTTTGCTATTCATTGAAAGCAGTAGTGACTGATTTGTATATA

>MinSyn\_1070|Strength:0.001382353

GCGTGTCTGTTTTAGTGAGGAGGTGGCTCCTACGTACAGGGCTCATCTCTCTGCCGACAGTGGTCCCAA  
AACATGTAGGCTATCACTATATAAGGTTTTGCTATTCATTGAAAGCAGTAGTGACTGATTTGTATATA

>MinSyn\_1211|Strength:0.001386601

GCGTGTCTGTTTTAGTGAGGAGGTGGCTCCTACCAATTAGGTTGTCTGCACCTCACTGAAGATAAGATA  
ATAATGTTGAAGATAAGAGATTTATGACCCCCGCCGATGACGCGGAAACTGGTACTTGTGTACAGGG  
CTCACTGCAATTTTCGGGAAACCTCCTCGTGCTAGGAGGACCGATAAGATTGATGAAAAGTCAAAAACA  
AAAATCAATTATATCAGCTTAGCAAGAACCATTATTGCGGTAGGTCACCTATATAAGGTTTTGCTATT

CATTGAAAGCAGTAGTGACTGATTTGTATATA  
>MinSyn\_1280|Strength:0.00138751  
GCGTGTCTGTTTTAGTGAGGAGGTGGCTCTACGGTAGGTCAAGATTGATGAAAAGTCAAAAACAAAA  
TCAATTATGACATCGAAAGGACAGTAGCCCAATTAGGTTGTGGTGGAGCACGACATGTGTACAGGGCT  
CCTATATAAGGTTTTGCTATTCATTGAAAGCAGTAGTGACTGATTTGTATATA  
>MinSyn\_1285|Strength:0.001388297  
GCGTGTCTGTTTTAGTGAGGATCCTTACCGCTATGGGTAAGATTA AAAACTGGTACTTGTGTACTCACTA  
TCAGCCAGCTTAGCAAGACCTCTACAAAAGTATTGCGATAAAGGAAAGGAAACCATTATTGCGTGCA  
TCGAAAGGACAGTACCTCACATGCACACCAGCATGTGTTGATCACCAGCTCCACTATGCCCAATTAGG  
TTGTCTGCAAGATTGATGAAAAGTCAAAAACAAAATCAATTATTCAGCTTAGCAGCCACTTGTGTGG  
TAGGTCACGACCACTATATAAGGTTTTGCTATTCATTGAAAGCAGTAGTGACTGATTTGTATATA  
>MinSyn\_1620|Strength:0.001391135  
GCGTGTCTGTTTTAGTGAGGGGAAAAGAAGAGGTTGTCTGCACCTCACATGGCACACCAGCATGTGTT  
GATCACCAGCTACGACCACTATGCCCAATTTATGACCCCCGCCGATGACGCGGGAGGTAGGTCACGAC  
CACTATAAAAATGTCAAAGATAGCTTAGCAAGACCTCTACTGGTGGAGCACGACAACGTGAAGATAAG  
ATAATAATGTTGAAGATAAGAGGACCGATGCTTCCATCAACAAATAATCCAAGTAAGTGTAGGCTATC  
AGCTTAGCAAGACCTATATAAGGTTTTGCTATTCATTGAAAGCAGTAGTGACTGATTTGTATATA  
>MinSyn\_1518|Strength:0.001396735  
GCGTGTCTGTTTTAGTGAGGTTATGACCCCCGCCGATGACGCGGGAGCCCAATTAGGTTGTCTGATCGA  
AAGGACAGTAACAAAGGTGGCTCCTACCTATGCCTGGTGGAGCACGACAGTTGTCTGCACCTTTTTCA  
ACAAGAGGACCGTCCATCAACAAATAATCCAAGTAAGTAGGCTCTATATAAGGTTTTGCTATTCATTG  
AAAGCAGTAGTGACTGATTTGTATATA  
>MinSyn\_1578|Strength:0.00141  
GCGTGTCTGTTTTAGTGAGGTCAGAAGATCAAAGGGCTACGATGCTGATATCCTTACCGCTATGGGTAA  
GATTCACTGCTAGGAGGACCGATGCTGATCCTATATAAGGTTTTGCTATTCATTGAAAGCAGTAGTGA  
CTGATTTGTATATA  
>MinSyn\_1235|Strength:0.001418006  
GCGTGTCTGTTTTAGTGAGGGGAAAAGAAGAGGTAATTCACTATCAGCGAGGACCGATGCTGATCTTG  
CATTGCGATAAAGGAAAGGCCGACCACTATGCCCAATTTGAAGATAAGATAATAATGTTGAAGATAAGA  
CTCTACACTATATAAGGTTTTGCTATTCATTGAAAGCAGTAGTGACTGATTTGTATATA  
>MinSyn\_1666|Strength:0.001422533  
GCGTGTCTGTTTTAGTGAGGAGGTGGCTCCTACCCTCACATGTAGGCTATCAGCTTAGCATCTCTCTGC  
CGACAGTGGTCCCAAAGCCTCAGTGGTCCCTCCACGTAGGTCACGACCACATTGCGATAAAGGAAAGG  
GCTGATCTTGCTTATGACCCCCGCCGATGACGCGGGAGGGCTCACTAACCAATTATTGCGACCTATAT  
AAGGTTTTGCTATTCATTGAAAGCAGTAGTGACTGATTTGTATATA  
>MinSyn\_1489|Strength:0.001423239  
GCGTGTCTGTTTTAGTGAGGAACCATTATTGCGCGCGGTAGGTCACGACCACGCACACCAGCATGTGTT  
GATCACCAGCTATCAGCTTAGCCTATATAAGGTTTTGCTATTCATTGAAAGCAGTAGTGACTGATTTG  
TATATA  
>MinSyn\_1878|Strength:0.001424307  
GCGTGTCTGTTTTAGTGAGGGCACACCAGCATGTGTTGATCACCAGCTATTAGGTTGTCAAGATTGATG  
AAAAGTCAAAAACAAAATCAATTATCGACCACTATGCCCAATGGAAAAAGAAGAGGTAAGTACTGCTAGGA  
GGAAAAATGTCAAAGATACTGCCTATATAAGGTTTTGCTATTCATTGAAAGCAGTAGTGACTGATTTG  
TATATA  
>MinSyn\_1549|Strength:0.00142526  
GCGTGTCTGTTTTAGTGAGGTTCTCTCTGCCGACAGTGGTCCCAAAGGCAGTGGTCCCTCCACCACCTC  
ACATGTAGGCTATCAGCTATCCTTACCGCTATGGGTAAGATTGGTTGAACCATTATTGCGGCCTGCAA  
ATATTTCTTGTTAGGTTGTCTGCACCTCACATCTATATAAGGTTTTGCTATTCATTGAAAGCAGTAGT  
GACTGATTTGTATATA  
>MinSyn\_1448|Strength:0.001426437  
GCGTGTCTGTTTTAGTGAGGTGAAGATAAGATAATAATGTTGAAGATAAGACCGATGCTGATCTTGCTT  
GCCTTGATGTTATGACCCCCGCCGATGACGCGGGAAACTGGTACGGAAAAAGAAGAGGTCTCTACAA  
AACTGGTAATCCTTACCGCTATGGGTAAGATTTTGTCTGCACCTGAAGCATCTTCTTAGGTAAGATT  
GATGAAAAGTCAAAAACAAAATCAATTATACATCAGCCACTTGTGTCTACAAAAGTGGTACTTGTGT

ACAGGAAAAATGTCAAAGATAGTACAGTCTCTCTGCCGACAGTGGTCCCAAATGCACCTCACATGTCT  
ATATAAGGTTTTGCTATTCATTGAAAGCAGTAGTGACTGATTTGTATATA  
>MinSyn\_1412|Strength:0.001430075  
GCGTGTTCGTTTTAGTGAGGATCCTTACCGCTATGGGTAAGATTTTGTCTGCACCTCACCAGTGGTCCC  
TCCACTACTTGTGGTGGAGCACGACAAGACCTCTACAAAAGTAGGTGGCTCCTACGTAGCTATATAAG  
GTTTTGCTATTCATTGAAAGCAGTAGTGACTGATTTGTATATA  
>MinSyn\_1230|Strength:0.001430435  
GCGTGTTCGTTTTAGTGAGGTCCTATCAGCCGCGGTAGGTACGACCACTATGGGAAAAAGAAGAGGT  
CAGGTGGCTCCTACGTAGCTATATAAGGTTTTGCTATTCATTGAAAGCAGTAGTGACTGATTTGTATA  
TA  
>MinSyn\_1940|Strength:0.001430435  
GCGTGTTCGTTTTAGTGAGGATTGCGATAAAGGAAAGGAATGGTGGAGCACGACAAAGACCTCTCTATA  
TAAGGTTTTGCTATTCATTGAAAGCAGTAGTGACTGATTTGTATATA  
>MinSyn\_1674|Strength:0.00143262  
GCGTGTTCGTTTTAGTGAGGGCTTTGTCAAAGCTAAAAAGATGATGCTGCCTTATGACCCCCGCCGA  
TGACGCGGGAGCTTAGCAAGACCTAGGTGGCTCCTACTCAGTGGTCCCTCCACCACATGTAGGCTATC  
TATATAAGGTTTTGCTATTCATTGAAAGCAGTAGTGACTGATTTGTATATA  
>MinSyn\_1169|Strength:0.001441601  
GCGTGTTCGTTTTAGTGAGGTGGTGGAGCACGACAAATTTTCAACAAGGGCTCACTGATTGCGATAAAG  
GAAAGGGTACTTGTGTAACCATTATTGCGTGTGTACAGGGCTCACTGCTTGAAGATAAGATAATAATG  
TTGAAGATAAGATGGCTATATAAGGTTTTGCTATTCATTGAAAGCAGTAGTGACTGATTTGTATATA  
>MinSyn\_1213|Strength:0.001443571  
GCGTGTTCGTTTTAGTGAGGAACCACGTCTACAAGCCTGCCTTGACAGCCACTTGTGTTGTACAGAGGT  
GGCTCCTACCACGACCACTACTATATAAGGTTTTGCTATTCATTGAAAGCAGTAGTGACTGATTTGTA  
TATA  
>MinSyn\_1649|Strength:0.001444946  
GCGTGTTCGTTTTAGTGAGGCAGTGGTCCCTCCACGGACCGATGCTGATCTTGAAGATAAGATAATAAT  
GTTGAAGATAAGATTATCGAAAGGACAGTACTAGGAGGACCGATGCTGATCCTATATAAGGTTTTGCT  
ATTCATTGAAAGCAGTAGTGACTGATTTGTATATA  
>MinSyn\_1553|Strength:0.00144513  
GCGTGTTCGTTTTAGTGAGGTGAAGATAAGATAATAATGTTGAAGATAAGAGCGGTAGGTCTTTTTCAAC  
AAGATGCTGATCTTGCCTATCGAAAGGACAGTACCACTATGCCCAATTATGACCCCCGCCGATGACGC  
GGGACGTGGTGGAGCACGACAAATTAATCCTTACCGCTATGGGTAAGATTGATGCTGATCTTGCCTG  
CCTTGATAACCACGTCTACAATCTATATAAGGTTTTGCTATTCATTGAAAGCAGTAGTGACTGATTTG  
TATATA  
>MinSyn\_1685|Strength:0.001451513  
GCGTGTTCGTTTTAGTGAGGGTGGGAGCCACCAACCTCACTTTTTCAACAAAGCTTAGCAAGACCTCTAC  
AAAAGTATTGCGATAAAGGAAAGGGAAAGATTGATGAAAAGTCAAAAACAAAATCAATTATGCCTTG  
ATCGAAAGGACAGTAAGGTCACGACCAAGCAAGTGGATAGGATCCTTACCGCTATGGGTAAGATTTAC  
TTGTCAGAAGATCAAAGGGCTATTTATGACCCCCGCCGATGACGCGGGAAGGACCGATGCTGATCTTG  
CCTGCTATATAAGGTTTTGCTATTCATTGAAAGCAGTAGTGACTGATTTGTATATA  
>MinSyn\_1300|Strength:0.001452033  
GCGTGTTCGTTTTAGTGAGGTTTTCAACAAGATGCTGATCTTTATGACCCCCGCCGATGACGCGGGACT  
GCTCTATATAAGGTTTTGCTATTCATTGAAAGCAGTAGTGACTGATTTGTATATA  
>MinSyn\_1275|Strength:0.001473729  
GCGTGTTCGTTTTAGTGAGGTCCATCAACAAATAATCCAAGTAAGATGTAGGCTTTTTCAACAAGGTCT  
ATATAAGGTTTTGCTATTCATTGAAAGCAGTAGTGACTGATTTGTATATA  
>MinSyn\_1123|Strength:0.001477798  
GCGTGTTCGTTTTAGTGAGGAACCACGTCTACAAGTACAGGGCTCAAGATTGATGAAAAGTCAAAAACA  
AAAATCAATTATAGGACCGATGCCAGCCACTTGTGTTCACTGCTAGGAGGACCGACTATATAAGGTTT  
TGCTATTCATTGAAAGCAGTAGTGACTGATTTGTATATA  
>MinSyn\_1311|Strength:0.001492174  
GCGTGTTCGTTTTAGTGAGGTTATGACCCCCGCCGATGACGCGGGACTCACTGCTAGGAGGTGAAGCAT  
CTTCTAGGTCACGACCACTATGCTGAAGATAAGATAATAATGTTGAAGATAAGAAAAGTGAACCAT

TATTGCGGATCTTGCCTGCCTTGATGACAGTGGTCCCTCCACTAGGCTATATAAGGTTTTGCTATTCA  
TTGAAAGCAGTAGTGACTGATTTGTATATA  
>MinSyn\_1080|Strength:0.001493798  
GCGTGTTCGTTTTAGTGAGGCAAATATTTCTTGTCTATCAGCTTAGCAAGACTCTCTCTGCCGACAGTG  
GTCCCAAAGCTATATAAGGTTTTGCTATTCATTGAAAGCAGTAGTGACTGATTTGTATATA  
>MinSyn\_1112|Strength:0.001495455  
GCGTGTTCGTTTTAGTGAGGTGGTGGAGCACGACAAGGAGGACCGATTCCATCAACAAATAATCCAAGT  
AAGCCTCACATGCTATATAAGGTTTTGCTATTCATTGAAAGCAGTAGTGACTGATTTGTATATA  
>MinSyn\_1426|Strength:0.00150514  
GCGTGTTCGTTTTAGTGAGGAAGATTGATGAAAAGTCAAAAACAAAATCAATTATTACAAAAGTGGTA  
TCGAAAGGACAGTAGACCTCTACAAAAGTGGTACTTGTGTACAGAAAATGTCAAAGATAGACATCCT  
TACCGCTATGGGTAAGATTACATGTAGCACACCAGCATGTGTTGATCACCAGCTCGACCACTATGCCT  
ATATAAGGTTTTGCTATTCATTGAAAGCAGTAGTGACTGATTTGTATATA  
>MinSyn\_1905|Strength:0.001516186  
GCGTGTTCGTTTTAGTGAGGTCAGAAGATCAAAGGGCTAAGCAAGACCTCATTGCGATAAAGGAAAGGC  
GACCACTATGCCAATTAGGTTGTCTGCATTATGACCCCCGCCGATGACGCGGGACTGATCTTGAATT  
TCGGGAAACCTCCTCGGGAGGACCGGTGGGAGCCACCAGACTATATAAGGTTTTGCTATTCATTGAAA  
GCAGTAGTGACTGATTTGTATATA  
>MinSyn\_1414|Strength:0.001516778  
GCGTGTTCGTTTTAGTGAGGATCCTTACCGCTATGGGTAAGATTGCTCACTGCTAGGAGGACCGATGCT  
GATCTCTCTGCCGACAGTGGTCCCAAAGTGGTACTTGTGTACAGAAAATGTCAAAGATAGACATCCT  
ATGCTGATCTTCCATCAACAAATAATCCAAGTAAGGAGCTATATAAGGTTTTGCTATTCATTGAAAG  
CAGTAGTGACTGATTTGTATATA  
>MinSyn\_1184|Strength:0.001522488  
GCGTGTTCGTTTTAGTGAGGATCCTTACCGCTATGGGTAAGATTCTGGTACTTGCACACCAGCATGTGT  
TGATCACCAGCTGTGTACAGGGCTCACTGCTAGGAGGTGGGAGCCACCAGTCTAGGCAGTGGTCCCT  
CCACACATGAAGCATCTTCCATGTAGGCTTTTCAACAAATCTATATAAGGTTTTGCTATTCATTGAA  
AGCAGTAGTGACTGATTTGTATATA  
>MinSyn\_1978|Strength:0.001528429  
GCGTGTTCGTTTTAGTGAGGTCCATCAACAAATAATCCAAGTAAGCCTATCGAAAGGACAGTAGCCCAA  
TTAGGTTGTCTGCACCTCACAAAGATTGATGAAAAGTCAAAAACAAAATCAATTATGAGGACCGATA  
TTGCGATAAAGGAAAGGACTGGTACCTATATAAGGTTTTGCTATTCATTGAAAGCAGTAGTGACTGAT  
TTGTATATA  
>MinSyn\_1380|Strength:0.001529024  
GCGTGTTCGTTTTAGTGAGGAAGATTGATGAAAAGTCAAAAACAAAATCAATTATACCGCACACCAGC  
ATGTGTTGATCACCAGCTCACTATGCCAATTAGGTTGTCTGCACAACCACGTCTACAAGTAGCTATA  
TAAGGTTTTGCTATTCATTGAAAGCAGTAGTGACTGATTTGTATATA  
>MinSyn\_1440|Strength:0.001530233  
GCGTGTTCGTTTTAGTGAGGAAAATGTCAAAGATATTGCCTGCATCCTTACCGCTATGGGTAAGATTT  
GTACAGGGCCTATATAAGGTTTTGCTATTCATTGAAAGCAGTAGTGACTGATTTGTATATA  
>MinSyn\_1662|Strength:0.001531061  
GCGTGTTCGTTTTAGTGAGGTTATGACCCCCGCCGATGACGCGGGACTTGTGTACAGGGCTCATCGAAA  
GGACAGTATGCCCTATATAAGGTTTTGCTATTCATTGAAAGCAGTAGTGACTGATTTGTATATA  
>MinSyn\_1133|Strength:0.001540984  
GCGTGTTCGTTTTAGTGAGGTGAAGCATCTTCTACTTGTCTCTCTGCCGACAGTGGTCCCAAACCT  
CTCTATATAAGGTTTTGCTATTCATTGAAAGCAGTAGTGACTGATTTGTATATA  
>MinSyn\_1236|Strength:0.001553959  
GCGTGTTCGTTTTAGTGAGGATTGCGATAAAGGAAAGGCGGAACCATTATTGCGCTTGTGTACTGAAGA  
TAAGATAATAATGTTGAAGATAAGATAGGTACACGACCACCTATATAAGGTTTTGCTATTCATTGAAAG  
CAGTAGTGACTGATTTGTATATA  
>MinSyn\_1874|Strength:0.001554615  
GCGTGTTCGTTTTAGTGAGGTTATGACCCCCGCCGATGACGCGGGAGATCGAAAGGACAGTACTTAGCA  
AGACCTCTACCTATATAAGGTTTTGCTATTCATTGAAAGCAGTAGTGACTGATTTGTATATA  
>MinSyn\_1143|Strength:0.001555396

GCGTGTTCGTTTTAGTGAGGAACCATTATTGCGAGCAAGTGAAGATAAGATAATAATGTTGAAGATAAG  
ACAGCTTAGCAAGACCTCTCTATATAAGGTTTTGCTATTCATTGAAAGCAGTAGTGACTGATTTGTAT  
ATA

>MinSyn\_1929|Strength:0.001556146

GCGTGTTCGTTTTAGTGAGGAAAAATGTCAAAGATATGTCTCTCTGCCGACAGTGGTCCCAAATTGGTG  
GGAGCCACCATGCCTGCCTTGATGATTCAGAAGATCAAAGGGCTATTAGGTAATTCGGGAAACCTCC  
TCGGTCCTATATAAGGTTTTGCTATTCATTGAAAGCAGTAGTGACTGATTTGTATATA

>MinSyn\_1477|Strength:0.001556808

GCGTGTTCGTTTTAGTGAGGAATTCGGGAAACCTCCTCGTACAGGGCTCACTGCTAGGAGGACCGATC  
AGAAGATCAAAGGGCTACGATGCTGATCTTGAAGATTGATGAAAAGTCAAAAACAAAATCAATTATA  
TGCTATATAAGGTTTTGCTATTCATTGAAAGCAGTAGTGACTGATTTGTATATA

>MinSyn\_1718|Strength:0.001557292

GCGTGTTCGTTTTAGTGAGGTGAAGATAAGATAATAATGTTGAAGATAAGAACTGGTTCACTATCAGC  
ACTATGCCCAATTTCCATCAACAAATAATCCAAGTAAGCTCACATTTATGACCCCCGCCGATGACGCG  
GGAACCTGTGTACAGGGCTCTATATAAGGTTTTGCTATTCATTGAAAGCAGTAGTGACTGATTTGTAT  
ATA

>MinSyn\_1416|Strength:0.001567477

GCGTGTTCGTTTTAGTGAGGTCCATCAACAAATAATCCAAGTAAGTCAGCTTTCTCTCTGCCGACAGTG  
GTCCCAAAGGGAAAAAGAAGAGGTGTACAGGGCTCACTGCTAGGAGAAGATTGATGAAAAGTCAAAAA  
CAAAAATCAATTATCTCAGAAGATCAAAGGGCTAACCGATGCTGATCTTGCCTGCCTATATAAGGTTT  
TGCTATTCATTGAAAGCAGTAGTGACTGATTTGTATATA

>MinSyn\_1096|Strength:0.001577622

GCGTGTTCGTTTTAGTGAGGGCACACCAGCATGTGTTGATCACCAGCTCGATGCTGATCTTGCATTGCG  
ATAAAGGAAAGGCTGCACCTCACCTATATAAGGTTTTGCTATTCATTGAAAGCAGTAGTGACTGATTT  
GTATATA

>MinSyn\_1732|Strength:0.001577631

GCGTGTTCGTTTTAGTGAGGAAGATTGATGAAAAGTCAAAAACAAAATCAATTATATTAGGTTGTCTT  
CCATCAACAAATAATCCAAGTAAGAGGAGGAAACCACGTCTACAATAGGAGGACCGGCACACCAGCAT  
GTGTTGATCACCAGCTCAAACCTGGCTATATAAGGTTTTGCTATTCATTGAAAGCAGTAGTGACTGAT  
TTGTATATA

>MinSyn\_1188|Strength:0.001596257

GCGTGTTCGTTTTAGTGAGGTGAAGCATCTTCCCAAGATTGATGAAAAGTCAAAAACAAAATCAATT  
ATCCTCTACAAAACAATTCGGGAAACCTCCTCGCGCGGTAGGTCACGACCACTATGCCCACTATATA  
AGGTTTTGCTATTCATTGAAAGCAGTAGTGACTGATTTGTATATA

>MinSyn\_1785|Strength:0.0015981

GCGTGTTCGTTTTAGTGAGGATCCTTACCGCTATGGGTAAGATTTAGGTCACGACCACTATGCCCAATT  
AGTTATGACCCCCGCCGATGACGCGGGAGATGCTGAAAAAATGTCAAAGATATCGCGAGGTGGCTCCT  
ACTCTCTATATAAGGTTTTGCTATTCATTGAAAGCAGTAGTGACTGATTTGTATATA

>MinSyn\_1573|Strength:0.001608725

GCGTGTTCGTTTTAGTGAGGAAGATTGATGAAAAGTCAAAAACAAAATCAATTATCAAGACCTCTACA  
AAACTGGTATGAAGCATCTTCCGGTACTTCTATATAAGGTTTTGCTATTCATTGAAAGCAGTAGTGAC  
TGATTTGTATATA

>MinSyn\_1932|Strength:0.001612409

GCGTGTTCGTTTTAGTGAGGAACCACGTCTACAACCTCACATGTAGGCTATAAAAATGTCAAAGATACG  
GCAAAATTTCTTGTGCCTATATAAGGTTTTGCTATTCATTGAAAGCAGTAGTGACTGATTTGTATAT  
A

>MinSyn\_1491|Strength:0.001617532

GCGTGTTCGTTTTAGTGAGGTGAAGATAAGATAATAATGTTGAAGATAAGATAGGTCACGACCACTATG  
CCCAATTAATTTCCGGGAAACCTCCTCGATCTTGCTATATAAGGTTTTGCTATTCATTGAAAGCAGTA  
GTGACTGATTTGTATATA

>MinSyn\_1222|Strength:0.001618033

GCGTGTTCGTTTTAGTGAGGCAGTGGTCCCTCCACTGCACCTCTCCATCAACAAATAATCCAAGTAAGC  
TCCTATATAAGGTTTTGCTATTCATTGAAAGCAGTAGTGACTGATTTGTATATA

>MinSyn\_1547|Strength:0.001618889

GCGTGTCTGTTTTAGTGAGGTGAAGATAAGATAATAATGTTGAAGATAAGAGCTGATCTTGCCTGCCTT  
GATGTGGTGGAGCACGACACTCTACAAAAGTGGTACTTGTGTACAGTCCATCAACAAATAATCCAAGT  
AAGTAGGAGGACCGATATCGAAAGGACAGTACCGCACACCAGCATGTGTTGATCACCAGCTTCTATAT  
AAGTTTTGCTATTCATTGAAAGCAGTAGTGACTGATTTGTATATA

>MinSyn\_1610|Strength:0.001629839

GCGTGTCTGTTTTAGTGAGGAAAATGTCAAAGATAGGACCGATTCTCTCTGCCGACAGTGGTCCCAA  
AGGCCATATAAGGTTTTGCTATTCATTGAAAGCAGTAGTGACTGATTTGTATATA

>MinSyn\_1848|Strength:0.001631405

GCGTGTCTGTTTTAGTGAGGACAGTGGTCCCTCCACGCGGTATCTCTCTGCCGACAGTGGTCCCAA  
AATGCTATATAAGGTTTTGCTATTCATTGAAAGCAGTAGTGACTGATTTGTATATA

>MinSyn\_1498|Strength:0.001648052

GCGTGTCTGTTTTAGTGAGGATCCTTACCGCTATGGGTAAGATTCTGATCTTGCCTGCAACCACGTCTA  
CAAACAGAACCATTATTGCGCTCTACAAAAGTGGCTATATAAGGTTTTGCTATTCATTGAAAGCAGTA  
GTGACTGATTTGTATATA

>MinSyn\_1715|Strength:0.001649669

GCGTGTCTGTTTTAGTGAGGTTATGACCCCCGCCGATGACGCGGGAAGTGGTACTTGTGTACAGGGCTC  
CATCAACAAATAATCCAAGTAAGAGGCTATCCTATATAAGGTTTTGCTATTCATTGAAAGCAGTAGTG  
ACTGATTTGTATATA

>MinSyn\_1597|Strength:0.001681434

GCGTGTCTGTTTTAGTGAGGTCCATCAACAAATAATCCAAGTAAGTTAGGTTTCAGAAGATCAAAGGGC  
TACTACTGCTAGGAGGACCGTGAAGATAAGATAATAATGTTGAAGATAAGAGCTATATAAGGTTTTGC  
TATTCATTGAAAGCAGTAGTGACTGATTTGTATATA

>MinSyn\_1483|Strength:0.00169109

GCGTGTCTGTTTTAGTGAGGCTGACGTAAGGGATGACGCACATGTGTATTATGACCCCCGCCGATGACG  
CGGGATTGTGGGAGCCACCACCCTATGCCAATTAGGTTGTCATTGCGATAAAGGAAAGGCTTGCCT  
GCCTTGACAGCCACTTGTGTATGAAGATAAGATAATAATGTTGAAGATAAGAATTAGGTTGTCTGCAC  
CTCACATATCCTTACCGCTATGGGTAAGATTTTAGCAAGACCTCTACAAAGGTGGCTCCTACCCACTA  
TGCCCAATTAGGTTGTCTGCAACCACGTCTACAAACCTCATATGTAGGCTATCAGCTTAGCACTATAT  
AAGTTTTGCTATTCATTGAAAGCAGTAGTGACTGATTTGTATATA

>MinSyn\_1738|Strength:0.001698319

GCGTGTCTGTTTTAGTGAGGTTATGACCCCCGCCGATGACGCGGGAGTGTGGAAAAGAAGAGGTGCTC  
TATATAAGGTTTTGCTATTCATTGAAAGCAGTAGTGACTGATTTGTATATA

>MinSyn\_1550|Strength:0.001709091

GCGTGTCTGTTTTAGTGAGGAACCACGTCTACAATCACTGCTAGGAGGACCAAGATTGATGAAAAGTCA  
AAAACAAAATCAATTATCACTACTATATAAGGTTTTGCTATTCATTGAAAGCAGTAGTGACTGATTT  
GTATATA

>MinSyn\_1682|Strength:0.001709091

GCGTGTCTGTTTTAGTGAGGTGAAGATAAGATAATAATGTTGAAGATAAGACACCTCACATGTTTCAGAA  
GATCAAAGGGCTACCAATTAGGTCTATATAAGGTTTTGCTATTCATTGAAAGCAGTAGTGACTGATTT  
GTATATA

>MinSyn\_1797|Strength:0.001715328

GCGTGTCTGTTTTAGTGAGGAATTTCCGGAAACCTCCTCGACCTCAGCACACCAGCATGTGTTGATCAC  
CAGCTACGACCACTATGCTATATAAGGTTTTGCTATTCATTGAAAGCAGTAGTGACTGATTTGTATAT  
A

>MinSyn\_1220|Strength:0.001726531

GCGTGTCTGTTTTAGTGAGGATCCTTACCGCTATGGGTAAGATTGCTGATCTTGGCACACCAGCATGTG  
TTGATCACCAGCTACTTGTGTACAGGGCTATATAAGGTTTTGCTATTCATTGAAAGCAGTAGTGACTG  
ATTTGTATATA

>MinSyn\_1561|Strength:0.001728503

GCGTGTCTGTTTTAGTGAGGTTATGACCCCCGCCGATGACGCGGGAATCTTGCCTGAAAAATGTCAAAG  
ATATAGGTGAAGATAAGATAATAATGTTGAAGATAAGATGCACCTATATAAGGTTTTGCTATTCATTG  
AAAGCAGTAGTGACTGATTTGTATATA

>MinSyn\_1643|Strength:0.001741958

GCGTGTCTGTTTTAGTGAGGAATTTCCGGAAACCTCCTCGGTCTGCACCTCACATGTGAAGATAAGATA



ATAATGTTGAAGATAAGATGATACTATATAAGGTTTTGCTATTCATTGAAAGCAGTAGTGACTGATTT  
GTATATA

>MinSyn\_1870|Strength:0.001758015

GCGTGTTCGTTTTAGTGAGGATCGAAAGGACAGTAACAATTGCGATAAAGGAAAGGTGTACAGGGTGGG  
AGCCACCAGTCTATATAAGGTTTTGCTATTCATTGAAAGCAGTAGTGACTGATTTGTATATA

>MinSyn\_1504|Strength:0.001777342

GCGTGTTCGTTTTAGTGAGGCAGCCACTTGTGTACTGCTAGAATTTGCGGAAACCTCCTCGCAAAACTG  
AAGATAAGATAATAATGTTGAAGATAAGATGGCTATATAAGGTTTTGCTATTCATTGAAAGCAGTAGT  
GACTGATTTGTATATA

>MinSyn\_1444|Strength:0.001777612

GCGTGTTCGTTTTAGTGAGGTTATGACCCCGCCGATGACGCGGGACTCTACAAAACCTTTTTCAACAAG  
GTGAAGCATCTTCCCGCACACCAGCATGTGTTGATCACCAGCTGCAAGACCTATATAAGGTTTTGCTA  
TTCATTGAAAGCAGTAGTGACTGATTTGTATATA

>MinSyn\_1637|Strength:0.001805298

GCGTGTTCGTTTTAGTGAGGTCCATCAACAAATAATCCAAGTAAGCGCAAATATTTCTTGTGTACAGC  
CACTATGCCCAAAAAATGTCAAAGATAGGTCCTATATAAGGTTTTGCTATTCATTGAAAGCAGTAGTG  
ACTGATTTGTATATA

>MinSyn\_1407|Strength:0.001807692

GCGTGTTCGTTTTAGTGAGGTCTCTCTGCCGACAGTGGTCCCAAATAGCACACCAGCATGTGTTGATCA  
CCAGCTTCAGCTTAGCAAGACCTCTATATAAGGTTTTGCTATTCATTGAAAGCAGTAGTGACTGATTT  
GTATATA

>MinSyn\_1661|Strength:0.001832768

GCGTGTTCGTTTTAGTGAGGAATTTGCGGAAACCTCCTCGTTTTGAAGATAAGATAATAATGTTGAAGAT  
AAGACTTGTGTACAGGGCTTCCATCAACAAATAATCCAAGTAAGCCCCTATATAAGGTTTTGCTATTC  
ATTGAAAGCAGTAGTGACTGATTTGTATATA

>MinSyn\_1185|Strength:0.001833828

GCGTGTTCGTTTTAGTGAGGTGGTGGAGCACGACACCTCTACAAAACCTAAAAATGTCAAAGATAATCAG  
CCACTTGTGTTAATTTGCGGAAACCTCCTCGTGTACAGTCTCTCTGCCGACAGTGGTCCCAAATAGGC  
TATATAAGGTTTTGCTATTCATTGAAAGCAGTAGTGACTGATTTGTATATA

>MinSyn\_1747|Strength:0.001852555

GCGTGTTCGTTTTAGTGAGGTTATGACCCCGCCGATGACGCGGGACTTTTTCAACAACCGATGCTGATC  
TGGAAAAAGAAGAGGTACTATATAAGGTTTTGCTATTCATTGAAAGCAGTAGTGACTGATTTGTATAT  
A

>MinSyn\_1067|Strength:0.001909375

GCGTGTTCGTTTTAGTGAGGCAAATATTTCTTGTACAAGATTGATGAAAAGTCAAAAACAAAAATCAAT  
TATTTGTGCTATATAAGGTTTTGCTATTCATTGAAAGCAGTAGTGACTGATTTGTATATA

>MinSyn\_1413|Strength:0.001958333

GCGTGTTCGTTTTAGTGAGGGCACACCAGCATGTGTTGATCACCAGCTACTTGTGTCCATCAACAAATA  
ATCCAAGTAAGGCTATATAAGGTTTTGCTATTCATTGAAAGCAGTAGTGACTGATTTGTATATA

>MinSyn\_1313|Strength:0.001960571

GCGTGTTCGTTTTAGTGAGGGTGGGAGCCACCATCATCCTTACCGCTATGGGTAAGATTTGGATTGCGA  
TAAAGGAAAGGAGACAACCATTATTGCGAGCTATATAAGGTTTTGCTATTCATTGAAAGCAGTAGTGA  
CTGATTTGTATATA

>MinSyn\_1751|Strength:0.002088889

GCGTGTTCGTTTTAGTGAGGATCCTTACCGCTATGGGTAAGATTCGTCCTACTATCAGCGTACCAGTGGTC  
CCTCCACACAGGGCTAACCACGTCTACAATACTCTATATAAGGTTTTGCTATTCATTGAAAGCAGTAG  
TGACTGATTTGTATATA

>MinSyn\_1502|Strength:0.002184507

GCGTGTTCGTTTTAGTGAGGAGGTGGCTCTACCAATCGAAAGGACAGTATTTTTCAACAACCTGGTATC  
CTTACCGCTATGGGTAAGATTACTATATAAGGTTTTGCTATTCATTGAAAGCAGTAGTGACTGATTTG  
TATATA

>MinSyn\_1182|Strength:0.002802625

GCGTGTTCGTTTTAGTGAGGATGAGCTAAGCACATACGTCAGGGGCTCACTGCTAGGAGGACCGATGCT  
GTCCATCAACAAATAATCCAAGTAAGGCTATCAAAAAATGTCAAAGATACCAATTAGGTTGTCTGCAC

TTATGACCCCCGCCGATGACGCGGGATCACTGCTAGGAGGACCGATGCTGATCTTAAGATTGATGAAA  
AGTCAAAAACAAAATCAATTATCAATCGAAAGGACAGTACAAGACCTCTACAAAACCTGGTACTCACT  
ATCAGCGTACTTGTGTCTATATAAGGTTTTGCTATTATTGAAAGCAGTAGTGACTGATTTGTATATA  
>MinSyn\_1795|Strength:0.003231172

GCGTGTTCGTTTTAGTGAGGCTGACGTAAGGGATGACGCACAGGTAAGGTTGTGTACAGGGCTCACTGAGC  
AAGTGGATTTAGGTTGTCTGCACCTCACATGTAGGCTTTATGACCCCCGCCGATGACGCGGAACTGG  
TACTTGTGAACCATTATTGCGATTAGGTTGGCTTTGTCAAAAAGCTAAAAAAGATGATGCTAGCAAGAC  
CTCTGCACACCAGCATGTGTTGATCACCAGCTGGTCACGACCACTCAGTGGTCCCTCCACGACCACTA  
TGCCCAATTAGGTTGTCTGCACTGAAGCATCTTCCACAAAACCTGGCTATATAAGGTTTTGCTATTTCAT  
TGAAAGCAGTAGTGACTGATTTGTATATA

>MinSyn\_1442|Strength:0.004153684

GCGTGTTCGTTTTAGTGAGGCTGACGTAAGGGATGACGCACAGGTAAGGTTGTGTACAGGGCTCACTGAGC  
AAGTGGATTTAGGTTGTCTGCACCTCACATGTAGGCTTTATGACCCCCGCCGATGACGCGGAACTGG  
TACTTGTGAACCATTATTGCGATTAGGTTGGCTTTGTCAAAAAGCTAAAAAAGATGATGCTAGCAAGAC  
CTCTGCACACCAGCATGTGTTGATCACCAGCTGGTCACGACCACTCAGTGGTCCCTCCACGACCACTA  
TGCCCAATTAGGTTGTCTGCACTGAAGCATCTTCCACAAAACCTGGCTATATAAGGTTTTGCTATTTCAT  
TGAAAGCAGTAGTGACTGATTTGTATATA

>MinSyn\_1244|Strength:0.004264256

GCGTGTTCGTTTTAGTGAGGAGCAAGTGGATTACTTCTGACGTAAGGGATGACGCACAGTTGTCTGCAC  
TTTTCAACAACAAAACCTGAACCATTATTGCGCTGCTAGGAGGACCGATGCTGACAAATATTTCTTGTT  
GCTGATCTTGCTGCCTTGAATTTGCGGAAACCTCCTCGGTGTACAGGGCTCACTGCTCAGCCACTTG  
TGTACCGATGCTGATCTTGCTGCCTTGTGAAGATAAGATAATAATGTTGAAGATAAGAGCGGTAGGT  
CACGACCACTGTGGGAGCCACCACACTATGCCCAATTAGGTTGTCTGCACCCTATATAAGGTTTTGCT  
ATTCATTGAAAGCAGTAGTGACTGATTTGTATATA

>MinSyn\_1652|Strength:0.0044974

GCGTGTTCGTTTTAGTGAGGAAAAATGTCAAAGATATTAGCAAGACCTATGACGTAAGCCATGACGTCT  
AAATTTTATGACCCCCGCCGATGACGCGGGAAGGTCACGACCACTATGCCCAAACCACGTCTACAAAA  
CTGGTACTTGTGTACAGGTAAGCATCTTCCGCAAGACCTCTACAAGCACACCAGCATGTGTTGATCA  
CCAGCTTTGTGTACAGGGCTCACTGCTAGGAGGCTTTGTCAAAAAGCTAAAAAAGATGATGCCACGACC  
ACTAATCCTTACCGCTATGGGTAAGATTCCGATGCTGATCTTGCTGCCTTGATGATACTATATAAGG  
TTTTGCTATTATTGAAAGCAGTAGTGACTGATTTGTATATA

>MinSyn\_1062|Strength:0.004752577

GCGTGTTCGTTTTAGTGAGGATGACGTAAGCCATGACGTCTATACAAAACCTGGTACTTGTGTAGCTTTG  
TCAAAAAGCTAAAAAAGATGATGCACCGATGCTGATCAAAAATGTCAAAGATACACATGTAGGCTATCA  
GCTTTGGTGGAGCACGACATGTGTACAGGGCCAGCCACTTGTGTTTAGGTTGTCTGCACCTCATCCAT  
CAACAAATAATCCAAGTAAGCGATGCTGATCTTGCTGCCTGAAGCATCTTCCGACTCAGAAGATCAA  
AGGGCTATACTTGTGTACAGGGCTCACTGCTACTATATAAGGTTTTGCTATTATTGAAAGCAGTAGT  
GACTGATTTGTATATA

>MinSyn\_1186|Strength:0.00510202

GCGTGTTCGTTTTAGTGAGGAGGTGGCTCCTACTGGTACTTGTGTACAGGGCTATGACGTAAGCCATGA  
CGTCTAAAACCTGGTACTTGTGTACAGGAACCACGTCTACAATTTTTCAACAATGTGTACAGGGCTCAC  
TGCTAGGTCTCTCTGCCGACAGTGGTCCCAAATGCTGGCTTTGTCAAAAAGCTAAAAAAGATGATGCA  
TGCTGATCTTGCTGCCTGCAAGATTGATGAAAAGTCAAAAACAAAATCAATTATTTGTGTACAGGGCTCA  
CAGCCACTTGTGTGTCTCAGAAGATCAAAGGGCTACCAATTAGGTTGTCTGCACCTCACCTATATAAG  
GTTTTGCTATTATTGAAAGCAGTAGTGACTGATTTGTATATA

>MinSyn\_1190|Strength:0.005211617

GCGTGTTCGTTTTAGTGAGGCTGACGTAAGGGATGACGCACAATCAGCTTATGAAGATAAGATAATAAT  
CGTCAGGACCAGTGGTCCCTCCACCCAATTAGGTTGTCTGCACCTCTGGTGGAGCACGACAACCACTA  
TGCCCAATTAGGTTGTCTGCACTCTCTGCGGACAGTGGTCCCAAAGTTGAAGCATCTTCCCTACAA  
AACTGGTACTTGTGTACAGGGCTCAGAAGATCAAAGGGCTAACTGCTAGGAGGACCGATTTTCAACAA  
TAGCAAGACCTCTACAAAACCTGGTACCTATATAAGGTTTTGCTATTATTGAAAGCAGTAGTGACTGA  
TTTTGTATATA

>MinSyn\_1246|Strength:0.006209338

GCGTGTTCGTTTTAGTGAGGCTGACGTAAGGGATGACGCACAATCAGCTTATGAAGATAAGATAATAAT

GTTGAAGATAAGACGACCACTATGCCCAATTAGGTTGTCTAGCAAGTGGATGGCTTTGTCAAAAAGCTA  
AAAAAGATGATGCGTCAGCCACTTGTGTTTGTCTGCACCTCACATGTAGGCTCACTATCAGCTTGCCA  
AGATTGATGAAAAGTCAAAAACAAAAATCAATTATGCTATCAGCTTAGCTCCATCAACAAATAATCCA  
AGTAAGGTACAGGGCTCACTGCTATATAAGGTTTTGCTATTTCATTGAAAGCAGTAGTGACTGATTTGT  
ATATA

>MinSyn\_1072|Strength:0.006318253

GCGTGTCTGTTTTAGTGAGGTTATGACCCCCGCCGATGACGCGGGAAGTGGTACTTGTGTACAGGGCTT  
CAGAAGATCAAAGGGCTAAGCCAGCCACTTGTGTCTCTACAAAAGTGGTACTGACGTAAGGGATGAC  
GCACACTTAGCAAGACCTCTACAAAAGTGGTATCTCTCTGCCGACAGTGGTCCCAAATGTGTACAGGG  
CTCACTGCTAGGAGGAAAAGATTGATGAAAAGTCAAAAACAAAAATCAATTATCTATCAGCTTAGCAAG  
ACCTCAAAAATGTCAAAGATACCAATTAGGTTGTCTGCACCTCACATGTATGAAGATAAGATAAAT  
GTTGAAGATAAGACTGGTACTTGTGTACAGGGCTCACTCTATATAAGGTTTTGCTATTTCATTGAAAGC  
AGTAGTGACTGATTTGTATATA

>MinSyn\_1487|Strength:0.00667425

GCGTGTCTGTTTTAGTGAGGGCTTTGTCAAAAAGCTAAAAAGATGATGCTATGCCCAATTAGGTTGTCT  
GATGAGCTAAGCACATACGTCAGACCACTATGCCCAATTAGGTTGTCAAATATTTCTTGTTATGCCCA  
ATTAGGTTGTCTGCATCAGAAGATCAAAGGGCTAGGTCACGACCACTATGATCCTTACCGCTATGGGT  
AAGATTTCACTGCTAGGAGGACCGATGCTGATCTCCATCAACAAATAATCCAAGTAAGTTGTCTGGCA  
CACCAGCATGTGTTGATCACCAGCTGCCCAATCTATATAAGGTTTTGCTATTTCATTGAAAGCAGTAGT  
GACTGATTTGTATATA

>MinSyn\_1499|Strength:0.006795702

GCGTGTCTGTTTTAGTGAGGCTGACGTAAGGGATGACGCACACTGATCTTGCCAGGTGGCTCCTACGCT  
ACAAATATTTCTTGTTAGGCGTGGGAGCCACCAGCCTCTCTCTGCCGACAGTGGTCCCAAAGTCACT  
GCTAGGAGGACCGATGCTGATGAAGCATCTTCCGGCTCACTGCTAGGAGGACCGATGCTGAATTTGCG  
GAAACCTCCTCGTCACTGCTAGGAGGACCGATGCTGATCTTGCTTTGTCAAAAAGCTAAAAAGATGAT  
GCATCAGCTTAGCTATATAAGGTTTTGCTATTTCATTGAAAGCAGTAGTGACTGATTTGTATATA

>MinSyn\_1396|Strength:0.00679873

GCGTGTCTGTTTTAGTGAGGAAGATTGATGAAAAGTCAAAAACAAAAATCAATTATGCACCTCACATGT  
AGGCTATCAGCTTATGAAGATAAGATAAATGTTGAAGATAAGACTCAGCCACTTGTGTTACAAAAC  
TGGTACTTGTGTATGACGTAAGCCATGACGTCTAACAAAAGTGGTACTTGTGTA AAAAATGTCAAAGA  
TAAGAATTTCCGGAAACCTCCTCGGCTTAGCAAGACCTCTACAAAAGTGGTAAATCCTTACCGCTATGG  
GTAAGATTTAGCAAGACCTCTACAAAAGTGGTCAAGTGGTCCCTCCACATGCCCAATTAGGTTGTCTGC  
ACCGCACACCAGCATGTGTTGATCACCAGCTGTAGGCTATCAGCTTAGCAAGACCTCTCTATATAAGG  
TTTTGCTATTTCATTGAAAGCAGTAGTGACTGATTTGTATATA

>MinSyn\_1368|Strength:0.006924539

GCGTGTCTGTTTTAGTGAGGAATTTCCGGAAACCTCCTCGACCACTATGCCCAATTAGGTTGTCTGATG  
AGCTAAGCACATACGTCAGAAACTGGTACTGTGGGAGCCACCATAAAAAATGTCAAAGATATAGGTCA  
CGACCACTATGCATCCTTACCGCTATGGGTAAGATTCAAGACCTCTACAAAATGGTGGAGCACGACAC  
ACTGCTAGGAGGACCGATGCTGTGAGAAGATCAAAGGGCTACTATGCCCAATTAGGTTGTGAAGATAA  
GATAAATGTTGAAGATAAGACCACTCTATATAAGGTTTTGCTATTTCATTGAAAGCAGTAGTGACTG  
ATTTGTATATA

>MinSyn\_1544|Strength:0.007112572

GCGTGTCTGTTTTAGTGAGGCTGACGTAAGGGATGACGCACACCTCACAGCCACTTGTGTTTGCCTGCC  
TTGATGATCCTTACCGCTATGGGTAAGATTTGCCTTGGCTTTGTCAAAAAGCTAAAAAGATGATGCTG  
CCCAATTAGGTTAAAAATGTCAAAGATATGCCTTGAACCATTATTGCGAAACTGGTACTTGTGTACA  
GGGCAAAATTTCTTGATGCCCAATTAGGTTGTTGAGAAGATCAAAGGGCTAAACTGGTACTTGTGT  
ACAGGGCTCACCTATATAAGGTTTTGCTATTTCATTGAAAGCAGTAGTGACTGATTTGTATATA

>MinSyn\_1418|Strength:0.007198842

GCGTGTCTGTTTTAGTGAGGATCCTTACCGCTATGGGTAAGATTATGCTGATCTTGCCTGCAAAATATTT  
CTTGTCAGCTTAGCAAGACCTCTACATGACGTAAGCCATGACGTCTATCTGCACCTCAGAAGATCAAA  
GGGCTATTAGCAAGACCTCTATCCATCAACAAATAATCCAAGTAAGTAGGAGGACCGATGCTAGGTGG  
CTCCTACGACCTCTACAAAACAAGATTGATGAAAAGTCAAAAACAAAAATCAATTATGCTATCAGCTT  
AGGGAAAAAGAAGAGGTCTAGGAGGACCGATGCTGATCAGCAAGTGGATGATGCTGATCTTGCCTGCC  
TTGATGCTATATAAGGTTTTGCTATTTCATTGAAAGCAGTAGTGACTGATTTGTATATA

>MinSyn\_1503|Strength:0.007241484

GCGTGTGTTTTAGTGAGGCAAATATTTCTTGTAAGACCTATCGAAAGGACAGTATAGGTCACGACCA  
CTATGCCCAATTATCCATCAACAAATAATCCAAGTAAGATATGACGTAAGCCATGACGTCTAGGGCTC  
ACTGCTAGGAGGACCGATGCTGAAGATAAGATAATAATGTTGAAGATAAGATAGGTCACGACCACTAT  
GCCCAATTAACCACGTCTACAAACCGATGCTGATCTTGCCTGCCTTAGGTGGCTCCTACTTGTGTAC  
AGGGCTCACTGCTGAAGCATCTTCCGTACTTGTGTACAGGGCTCACTGCTAGGATCAGAAGATCAAAG  
GGCTACTGATCTTGCCTGCTATATAAGGTTTTGCTATTCATTGAAAGCAGTAGTGACTGATTTGTATA  
TA

>MinSyn\_1689|Strength:0.00725493

GCGTGTGTTTTAGTGAGGAGCAAGTGGATTATCATGAGCTAAGCACATACGTCAGCTGATCTTGCCT  
GCCTTGATGAATTCGGGAAACCTCCTCGTAGGAGGACCGATGCTGATCTTGCCTGCCTGAAGATAAG  
ATAATAATGTTGAAGATAAGATGATCTTGTCCATCAACAAATAATCCAAGTAAGTTGTGTACAGGGCT  
CACCAGCCACTTGTGTCCCAATGCTTTGTCAAAGCTAAAAAGATGATGCGATGCTGATCTTCTATA  
TAAGGTTTTGCTATTCATTGAAAGCAGTAGTGACTGATTTGTATATA

>MinSyn\_1459|Strength:0.007405516

GCGTGTGTTTTAGTGAGGATCCTTACCGCTATGGGTAAGATTTGCTAGGAGGACCGATGCTGATCTT  
GCCATGACGTAAGCCATGACGTCTACTCACATCCATCAACAAATAATCCAAGTAAGCCGATGCTGATC  
TTGCCTGCCTTGATAACCATTATTGCGCTTAGCAAGACCTCTACAAAAGTGGTTGAAGCATCTTCCAC  
CTCTACAAAAGTGGTACTTATGACCCCCGCGATGACGCGGGACATGTAGGCTCTCTCTGCCGACAGT  
GGTCCCAAAATGCTGATCTTGGGAAAAAGAAGAGTAATTAGGTTGTCTGCACCTCTATATAAGGTTT  
TGCTATTCATTGAAAGCAGTAGTGACTGATTTGTATATA

>MinSyn\_1048|Strength:0.007982987

GCGTGTGTTTTAGTGAGGTCAGAAGATCAAAGGGCTAGGTCACGACCACTATGCCCAATTAAGTACG  
TAAGGGATGACGCACATGCCCTGAAGATAAGATAATAATGTTGAAGATAAGAAGGCTATCAGCTTAC  
TATCAGCCCAGCCACTTGTGTTTAGCAAGACCTCTACAAAATCGAAAGGACAGTACACTAGCACACCA  
GCATGTGTTGATCACCAGCTGGTAGAAGATTGATGAAAAGTCAAAAACAAAAATCAATTATGCACCTC  
ACATGTAGGCTATCAGCTTAGCAGCAAGTGGATGCACCTCACACTATATAAGGTTTTGCTATTCATTG  
AAAGCAGTAGTGACTGATTTGTATATA

>MinSyn\_1772|Strength:0.008165953

GCGTGTGTTTTAGTGAGGAACCATTATTGCGCTTGCCTGCCTTGATGCAGCCACTTGTGTTAGGAGG  
ACCGATGCTGATCTTGCCTGCCTGACGTAAGGGATGACGCACAACCTATGCCCAATTAGGTTGTCTGTG  
AAGCATCTTCCCTGCTAGGAGGACCGATGCTGATTTTCAACAACACTGCTAGGAGGACCGATGCTGTG  
GTGGAGCACGACACAAAAGTGGTACTTGGCTTTGTCAAAGCTAAAAAGATGATGCCGATGCTGATC  
TTGCCTGCCTAATTTTCGGGAAACCTCCTCGCAGGTGGCTCCTACTCACATGTAGGCTATCCTATATA  
GGTTTTGCTATTCATTGAAAGCAGTAGTGACTGATTTGTATATA

>MinSyn\_1174|Strength:0.008625626

GCGTGTGTTTTAGTGAGGATGACGTAAGCCATGACGTCTACCTGCCTTGATGATCTCTCTGCCGACA  
GTGGTCCAAAAGGTCATCAGAAGATCAAAGGGCTACCCAATTAGGTTGTCTGCACCTGCTTTGTCAA  
AAGCTAAAAAGATGATGCTAGGCTATCAGCTTAAACCATTATTGCGACTATGCCCAATTAGTTATGA  
CCCCCGCCGATGACGCGGGAATTAGGTTGTGAAGCATCTTCCATGTAGGCTATCAGCTTAGCAAGACC  
CTATATAAGGTTTTGCTATTCATTGAAAGCAGTAGTGACTGATTTGTATATA

>MinSyn\_1314|Strength:0.008645313

GCGTGTGTTTTAGTGAGGATCCTTACCGCTATGGGTAAGATTAAGACCTCTACAATTATGACCCCCG  
CCGATGACGCGGGATGTGATGACGTAAGCCATGACGTCTAATGCTGATCTTGCCTGCCTTGTCTCTCT  
GCCGACAGTGGTCCCAATGTCTGCACCTACCAAATATTTCTTGTGTACGACCACTATGCCCAATT  
AGGTTCAAGTGGTCCCTCCACAAGACCTCTAGCACACCAGCATGTGTTGATCACCAGCTCGATGCTGAT  
CTTGCCTGCCTTGATGATAAATTTTCGGGAAACCTCCTCGCAAAGTGGTACTTGTGCTATATAAGGTT  
TTGCTATTCATTGAAAGCAGTAGTGACTGATTTGTATATA

>MinSyn\_1479|Strength:0.00871201

GCGTGTGTTTTAGTGAGGAACCATTATTGCGTGCACCTCACATGTAGGCTATCAGTGGTCCCTCCAC  
TTGATGACGTAAGCCATGACGTCTATGCATCAGAAGATCAAAGGGCTAGTGTACAGGGCTCACTGCTA  
GGATTTTCAACAATTGTATCGAAAGGACAGTATGTAGGCTATCAGCTTAGCAACAAATATTTCTTGTCT  
ACTGCTAGGAGGACCGATGACGCAAGTGGATGCTCACTGCTAGGAAGATTGATGAAAAGTCAAAAACA  
AAAATCAATTATAGACCTCTACAAAAGTGGTACTTGTGTACACTATATAAGGTTTTGCTATTCATTGA

AAGCAGTAGTACTGATTTGTATATA

>MinSyn\_1454|Strength:0.008969715

GCGTGTTCGTTTTAGTGAGGATGACGTAAGCCATGACGTCTAAGACCTCTACAAAACCTGGTACTTGAAC  
CATTATTGCGTGTAACCACGTCTACAAGTACTTGTGTACAGGGCTCACATCCTTACCGCTATGGGT  
AAGATTTGGTGGGAGCCACCAAGACCTGAAGCATCTTCCATGCCCAATTAGGTTGTCTAGCAAGTGGA  
TCTCTACAAAACCTGGTACTTGTGTACAGGGTTTTCAACAAACAAAACCTGGTACTTGTGTACAGGCTAT  
ATAAGTTTTGCTATTCATTGAAAGCAGTAGTACTGATTTGTATATA

>MinSyn\_1488|Strength:0.009129715

GCGTGTTCGTTTTAGTGAGGAACCACGTCTACAAGACCTCTACAAAACCTGGTACTTGTGTGAAGCATCT  
TCCACTGACGTAAGGGATGACGCACATCACATGTAGGCTATCAAATATTTCTTGTTATTTTCAACAAG  
CTAGGAGGACCGATGCTGATCTTGCCTTCCATCAACAAATAATCCAAGTAAGCTCTACAAATGGTGGA  
GCACGACACACTATGCTCTCTGCGGACAGTGGTCCCAAACCTCTACAAAACCTGGTACTTGTGTGAG  
TGGTCCCTCCACTGTGTACAGGGCTCACTGCTAGGAGGACCTATATAAGTTTTGCTATTCATTGAAA  
CGAGTAGTACTGATTTGTATATA

>MinSyn\_1157|Strength:0.009257531

GCGTGTTCGTTTTAGTGAGGATGAGCTAAGCACATACGTCAGACGACTTATGACCCCCGCCGATGACGC  
GGGAAACCTGGTACTTGTCTCTCTGCCGACAGTGGTCCCAAAGACCTCTACAATGAAGCATCTTCCAA  
TTAGGTTGTCTGCACCTCACATTTTTCAACAAGTACTTGCCTGCCTTGATGGCTTTGTCAAAGCT  
AAAAAAGATGATGCTAGGTCACGACCACTATGCCCACTATATAAGTTTTGCTATTCATTGAAAGCAG  
TAGTACTGATTTGTATATA

>MinSyn\_1851|Strength:0.009264639

GCGTGTTCGTTTTAGTGAGGCTGACGTAAGGGATGACGCACAACAGGGCTCCATCAACAAATAATCCAA  
GTAAGATTAGTTGTCTGCACCTCACATGTAGGAAAAATGTCAAAGATATGTACAGGGCTCAAATTTT  
GGGAAACCTCCTCGATGTAGGCTATGTGGGAGCCACCAGGTTGTCTGCACCTCACATGTAGGCTATCA  
TCACTATCAGCCGATGCTGATCTTGCAGCAAGTGGATTCAGTCTAAACCATTATTGCGATGCTATA  
TAAGTTTTGCTATTCATTGAAAGCAGTAGTACTGATTTGTATATA

>MinSyn\_1564|Strength:0.0098076

GCGTGTTCGTTTTAGTGAGGATGACGTAAGCCATGACGTCTAGCTATCAGCTTAGCAAGACCTCTCACT  
ATCAGCCACTGCTAGAGGTGGCTCCTACAACCTGGTACTTGTGTACAGAGCAAGTGGATTAGGTTGTCT  
GCACCTCACATAACCACGTCTACAAGCACCTCACATGTAGGCTATCAGGAAAAAGAAGAGGTGGGCTC  
ACTGCTAGGAGCTTTGTCAAAGCTAAAAAAGATGATGCAGCAAGACCTCTACAAACTATATAAGGTT  
TTGCTATTCATTGAAAGCAGTAGTACTGATTTGTATATA

>MinSyn\_1780|Strength:0.00981818

GCGTGTTCGTTTTAGTGAGGCTCTCTGCCGACAGTGGTCCCAAATCTTGCTGCCTTGATAACCATT  
ATTGCGTGCCTTGACTGACGTAAGGGATGACGCACATCAGCTTAGCAAGACCTCTACAAAACCTGTGAA  
GATAAGATAATAATGTTGAAGATAAGATAGGTCACGATCAGAAGATCAAAGGGCTAACCCTGGTGGA  
GCACGACATCATCGAAAGGACGTAAGTACTTCACTATCAGCTGTACAGGGCTCACTGCTAGGTTATGACCC  
CCGCCGATGACGCGGGAGCTTAGCAAGACCTCTACAAAACCTGGTCTATATAAGGTTTTGCTATTCATT  
GAAAGCAGTAGTACTGATTTGTATATA

>MinSyn\_1303|Strength:0.010214276

GCGTGTTCGTTTTAGTGAGGTTATGACCCCCGCCGATGACGCGGGACCTCACATGTAGGCTATCAGCTT  
TGTCAAAAGCTAAAAAAGATGATGCCACTATGCCAATTATGACGTAAGCCATGACGTCTAAGGTCAC  
GAAAGATTGATGAAAAGTCAAAAACAAAATCAATTATCGACCACTATGAAAAATGTCAAAGATAGCG  
GTAGGTCACGACCACTATGCGGAAAAAGAAGAGGTGGTCACGACCACTATGCCCTCAGAAGATCAAAG  
GGCTATGTGTACAGGGCTCACTGTCCATCAACAAATAATCCAAGTAAGATGCTGATCTTGCTATATAA  
GGTTTTGCTATTCATTGAAAGCAGTAGTACTGATTTGTATATA

>MinSyn\_1270|Strength:0.010526518

GCGTGTTCGTTTTAGTGAGGTCAGAAGATCAAAGGGCTACCGATGCTGATCTTGCTGCCTTATGAGCT  
AAGCACATACGTCAGTCACAAATATTTCTTGTTACATGTAGGCTATCAGCTTAGCAAGACTCACTAT  
CAGCCATATTGCGATAAAGGAAAGGTATGCCCAATTAGGTTGTCTGCACGTGGGAGCCACCATGCTAG  
GAGGACCGATGCAAAAATGTCAAAGATACCCATTTTTCAACAAGACCGATGCTGATCTTGCTGCCTA  
TATAAGTTTTGCTATTCATTGAAAGCAGTAGTACTGATTTGTATATA

>MinSyn\_1420|Strength:0.010542649

GCGTGTTCGTTTTAGTGAGGACAGTGGTCCCTCCACACTATGCCCAATTAGGTTGTCTGCACTGACGTA

GGGATGACGCACAAGGGCTCACTGCTAGGAGGACCGATGCTGATCACTATCAGCCTGCACCTCACATG  
TAATCGAAAGGACAGTATGTGTGTGGGAGCCACCAACAGGGCTCACTGCTAGGAGGACCGATGAATTT  
CGGGAAACCTCCTCGTAGGAGGACCGATGCTGGTGGAGCACGACATCACGACCACTATGCCCAATTAG  
GAACCATTATTGCGCTTGCTATATAAGGTTTTGCTATTCATTGAAAGCAGTAGTGACTGATTTGTATA  
TA

>MinSyn\_1746|Strength:0.010709748

GCGTGTGTTTTAGTGAGGATTGCGATAAAGGAAAGGGACCACTATGCCCAATTAGGTTGTCTCCATC  
AACAAATAATCCAAGTAAGCAAACTGGTACATCCTTACCGCTATGGGTAAGATTTTGTCTGCACCTG  
CTTTGTCAAAGCTAAAAAAGATGATGCACGACCACTATGCCCTGACGTAAGGGATGACGCACAAAAA  
GATTGATGAAAAGTCAAAAACAAAATCAATTATACATGTAGGCTATCAGCTTAGCAAGACCTTTTCA  
ACAAGGGCTCACTGCTAGGAGGACCGATGCTGATCGAAAGGACAGTAGCTTAGCAAGACCTCTACAAA  
ACTGGTAAACCATTATTGCGGCACCTCACATGTAGGCTATCCTATATAAGGTTTTGCTATTCATTGAA  
AGCAGTAGTGACTGATTTGTATATA

>MinSyn\_1227|Strength:0.010722348

GCGTGTGTTTTAGTGAGGTTATGACCCCCGCCGATGACGCGGGAAAGACCTCTACAACAGTGGTCCC  
TCCACGGTACTTGTGTACAGGGCTCACTGCTATGAAGATAAGATAATAATGTTGAAGATAAGACCAAT  
TAGGTTGTCTGCATGACGTAAGCCATGACGTCTATGGTACTTGTGTACAGGGCTAAGATTGATGAAAA  
GTCAAAAACAAAATCAATTATATTAGGTTGTCTGCACCTCACATGTATTTTCAACAAATTAGGTTGT  
CTGCACCTCACATGTAGGCTTGGTGGAGCACGACAAGCAAGACCTCTACAAAACCTGGTACTTGTAAAT  
TCGGGAAACCTCCTCGACGCTATATAAGGTTTTGCTATTCATTGAAAGCAGTAGTGACTGATTTGTAT  
ATA

>MinSyn\_1714|Strength:0.010909608

GCGTGTGTTTTAGTGAGGAAGATTGATGAAAAGTCAAAAACAAAATCAATTATGACCTCTACAAAA  
CTGGTACATGACGTAAGCCATGACGTCTATGCTAGGAGGGCTTTGTCAAAGCTAAAAAAGATGATGC  
TCACTAACCAATTATTGCGTCTGCACCTCACATGTAGGCTATCAGCTATCGAAAGGACAGTACTTGATA  
TCCTTACCGCTATGGGTAAGATTTGCCCAATTAGGTTGCAGTGGTCCCTCCACGCTGATCTTGCCAGC  
CACTTGTGTTACTTGTGTACAGGGCTCACTATATAAGGTTTTGCTATTCATTGAAAGCAGTAGTGACT  
GATTTGTATATA

>MinSyn\_1061|Strength:0.011355143

GCGTGTGTTTTAGTGAGGATCCTTACCGCTATGGGTAAGATTCACGACCTGGTGGAGCACGACAATT  
AGGTTGTCTGCACCTCATGAGCTAAGCACATACGTCAGAATTAGGTTGTCTTATGACCCCCGCCGATG  
ACGCGGGAGCACCTCTCCATCAACAAATAATCCAAGTAAGTACGCACACCAGCATGTGTTGATCACC  
GCTGCTATCAGCTTAGCAAGACCTTTTCAACAAGCTTAGCAAGACCTCTACAAAACCTGGTAAAAATGT  
CAAAGATAACAGCTATATAAGGTTTTGCTATTCATTGAAAGCAGTAGTGACTGATTTGTATATA

>MinSyn\_1434|Strength:0.0117363

GCGTGTGTTTTAGTGAGGAAGATTGATGAAAAGTCAAAAACAAAATCAATTATGGAGGACCGATGT  
CCATCAACAAATAATCCAAGTAAGTAGGTTGTCTGCACCTCACATGTTATGACCCCCGCCGATGACGC  
GGGATACAAAACCTGGTACTCTGACGTAAGGGATGACGCACAGGTCACGACCACTATGCAAATATTTCT  
TGTACCACTATGCCCAATTAAGCAAGTGGATAAGACCTCTACAAAACCTCAGCCACTTGTGTTATCGAA  
AGGACAGTATAGGCTATCAGCTTAGCAATCTCTCTGCCGACAGTGGTCCCAAAAAGACCTCTACAAAA  
CTGGTACTTGTGTACCTATATAAGGTTTTGCTATTCATTGAAAGCAGTAGTGACTGATTTGTATATA

>MinSyn\_1104|Strength:0.011749036

GCGTGTGTTTTAGTGAGGATGACGTAAGCCATGACGTCTATTGCCTGCTGAAGATAAGATAATAATG  
TTGAAGATAAGAGGCTCACTATTGCGATAAAGGAAAGGACAAAACCTGGTACTTGTGTAAAGATTGATG  
AAAAGTCAAAAACAAAATCAATTATTCTGCACCTCACATGTAGGCTATTCAGAAGATCAAAGGGCTA  
GCCTGTCTCTGCCGACAGTGGTCCCAAAGCGGTAGGTCACGACCACTCTATATAAGGTTTTGCTAT  
TCATTGAAAGCAGTAGTGACTGATTTGTATATA

>MinSyn\_1168|Strength:0.011782049

GCGTGTGTTTTAGTGAGGTAAGATAAGATAATAATGTTGAAGATAAGAACCGATGCTGACAAATAT  
TTCTTGTGCTTAGCAAGACCTCTACAAAACCTGGTAAATTTGGGAAACCTCCTCGGTACGACCACTA  
TGCCATGAGCTAAGCACATACGTAGGCTATCAGAGGTGGCTCCTACAAAACCTGGTACTTGTGTAC  
AGGGCTCTGAAGCATCTTCTCTTGCCTGCCTGAAGATTGATGAAAAGTCAAAAACAAAATCAATT  
ATACCTCACATGTAGGCTATCAGCTTAGCAATGGTGGAGCACGACACGCGGTACTATATAAGGTTTTG  
CTATTCATTGAAAGCAGTAGTGACTGATTTGTATATA

>MinSyn\_1668|Strength:0.012095567  
GCGTGTCTGTTTTAGTGAGGATCGAAAGGACAGTAACATGACGTAAGCCATGACGTCTATTGTGTACAG  
GGCTCACTGCTAGGTCCATCAACAAATAATCCAAGTAAGTATCTCAGAAGATCAAAGGGCTAACTTGT  
GTACAGGGCTCACTGCTAGTCTCTCTGCCGACAGTGGTCCCAAACGACCACTATTATGACCCCCGCC  
GATGACGCGGGAAGGTCACGACAAATATTTCTTGTTACATGTAGGCTATCAGCTTAGCCTATATAAG  
GTTTTGCTATTCATTGAAAGCAGTAGTGACTGATTTGTATATA

>MinSyn\_1792|Strength:0.012237512  
GCGTGTCTGTTTTAGTGAGGAGCAAGTGGATTACAGCTTAGCAAATGACGTAAGCCATGACGTCTAGTCA  
CGACCACTATGCAAAAATGTCAAAGATACTCTCAGTGGTCCCTCCACAAAACCTGGTACTTGTGTACAG  
GGCTCAGAAGATCAAAGGGCTAACTATGCCCAATTAGGTTGTCTGCAAGGTGGCTCCTACGGAGGACC  
GATGCTGCAAATATTTCTTGTACAGGGCTCACTGCTGGTGGAGCACGACACAAGACCTCTACTATATA  
AGGTTTTGCTATTCATTGAAAGCAGTAGTGACTGATTTGTATATA

>MinSyn\_1121|Strength:0.01231575  
GCGTGTCTGTTTTAGTGAGGAAAATGTCAAAGATATGTACAGGGCTCACTGCTAGGAGGCAAATATTT  
CTTGTAAAACTGGTACTTGTGTACAGGGCTCACTGATGAGCTAAGCACATACGTCAGATGATATTATG  
ACCCCCGCCGATGACGCGGGAGGTTGTCTGCACCTCACAATCGAAAGGACAGTATGGTACTTGTGTAC  
AGGGCTCACTGCGCACACCAGCATGTGTTGATCACCAGCTCTTAGCAAGACCTCTACAAATTGCGATA  
AAGGAAAGGTAGGTCACGACCTATATAAGGTTTTGCTATTCATTGAAAGCAGTAGTGACTGATTTGTA  
TATA

>MinSyn\_1020|Strength:0.012581168  
GCGTGTCTGTTTTAGTGAGGAAAATGTCAAAGATAACGACCACTATGCCCAATTAGCTGACGTAAGGG  
ATGACGCACAAGCAAGAAACCACGTCTACAAAGCTTAGCAATGAAGCATCTTCCCACGACCACTATGC  
CCAATTAGGTCAGTGGTCCCTCCACGCAAGACCTCTACAAAACCTGGTATGGTGGAGCACGACAACCAC  
TATGCCCAATTAGGTTGTCTAGGTGGCTCCTACTCATCGAAAGGACAGTAGTAGGTCACGACCACTAT  
GCTATATAAGGTTTTGCTATTCATTGAAAGCAGTAGTGACTGATTTGTATATA

>MinSyn\_1263|Strength:0.012762558  
GCGTGTCTGTTTTAGTGAGGAACCACGTCTACAAACTGGTACTTGTGTAAATTTCCGGAAACCTCCTCG  
GGGCTCACTGCCTGACGTAAGGGATGACGCACACACATGTAGGCTATCAGAAAAATGTCAAAGATAAT  
CAGGGAAAAGAAGAGGTAAATGGTGGAGCACGACACACCTCACATTGAAGCATCTTCCGTAGGTCAC  
GACCACTATGCTCACTATCAGCACCTCACATGTAGGCTATCAGCTTAGCAAAGATTGATGAAAAGTCA  
AAAACAAAATCAATTATCCTATATAAGGTTTTGCTATTCATTGAAAGCAGTAGTGACTGATTTGTAT  
ATA

>MinSyn\_1065|Strength:0.012788347  
GCGTGTCTGTTTTAGTGAGGTGAAGCATCTTCCAGCAAGACCTCTACAAAACCTGGTACTTGAAGATTGA  
TGAAAAGTCAAAAACAAAATCAATTATTAGGTTGTCTGCACCTCACATGTAGTCTCTCTGCCGACAG  
TGGTCCCAAAGGTTGCTTTGTCAAAGCTAAAAAAGATGATGCGGCTCATGAGCTAAGCACATACGTC  
AGTTAGGTTGTCTGCACCTCACGTGGGAGCCACCAAGGACCGATGCTGATCTTGCCTGCCTTGAATTG  
CGATAAAGGAAAGGCGATGCTGATCTTTGAAGATAAGATAAATGTTGAAGATAAGATATGCCCAAT  
TAGGTTGTCTGCTATATAAGGTTTTGCTATTCATTGAAAGCAGTAGTGACTGATTTGTATATA

>MinSyn\_1445|Strength:0.012854288  
GCGTGTCTGTTTTAGTGAGGATGACGTAAGCCATGACGTCTACCAATTAGGTTGTCCAGCCACTTGTGT  
TGCAAACCACGTCTACAACAGCTTAGCAAGACCTCATCCTTACCGCTATGGGTAAGATTAGGCTATCA  
GCTTAGCAAAAATGTCAAAGATATTGTGATTATGACCCCCGCCGATGACGCGGGATGCTGATCTT  
GCCTGCCTTGAATCGAAAGGACAGTATGTACAGGGCTCACTCTATATAAGGTTTTGCTATTCATTGAA  
AGCAGTAGTGACTGATTTGTATATA

>MinSyn\_1897|Strength:0.012971484  
GCGTGTCTGTTTTAGTGAGGAGCAAGTGGATGGAGGACTGACGTAAGGGATGACGCACACAATTAGGTT  
GTCTGCAGCACACCAGCATGTGTTGATCACCAGCTACCGATGCTTTGTCAAAGCTAAAAAAGATGAT  
GCGGTCACGACCACTATGCCCAATTAATTTCCGGAAACCTCCTCGCTGCACCTCACATGTAGGCTTGA  
AGCATCTTCTAAAAATGTCAAAGATAGCTGATCTTGCCTGCCTTGTGATCTATATAAGGTTTTGCT  
ATTCATTGAAAGCAGTAGTGACTGATTTGTATATA

>MinSyn\_1114|Strength:0.013122754  
GCGTGTCTGTTTTAGTGAGGTCCATCAACAAATAATCCAAGTAAGTCAAGCTTAGCAAGACCTCTACCTG  
ACGTAAGGGATGACGCACATACAAAACCTGGTACTTGTGTACAGAACCACGTCTACAATGTGTACAGGG

CTCACTGCTAGGAGGACTGGTGGAGCACGACAGACCACTATGTCTCTCTGCCGACAGTGGTCCCAAAT  
ATCAGCTTAGCCAGCCACTTGTGTGATGCTGATCTTGCTGCCTTGATGATTTTTCAACAACCTCACT  
GCTACTATATAAGGTTTTGCTATTCATTGAAAGCAGTAGTGACTGATTTGTATATA

>MinSyn\_1849|Strength:0.013222254

GCGTGTGTTTTAGTGAGGATTGCGATAAAGGAAAGGTAGGAGGACCGATGCTGATCAGCCACTTGTG  
TTAGGAGGACCGATGACGTAAGCCATGACGTCTAACTGCTAGGAGGACCGATGCTTCACTATCAGCCA  
GGGCTCACTGCTAGATCGAAAGGACAGTACTGCTAGGAGGACCGATTGAGAAGATCAAAGGGCTAACA  
AACTGGTACTTGTGTAATTTGCGGAAACCTCCTCGTTGTGTACAGTTATGACCCCCGCCGATGACGC  
GGGACTGCCTTGATGACTATATAAGGTTTTGCTATTCATTGAAAGCAGTAGTGACTGATTTGTATATA

>MinSyn\_1495|Strength:0.013454555

GCGTGTGTTTTAGTGAGGCTGACGTAAGGGATGACGCACACTGGTACTTGTGTACAGGGCTGTGGGA  
GCCACCACTGATCTTGCTGAAGATAAGATAATAATGTTGAAGATAAGAGACCGATGCTGGTGGAGCAC  
GACAAAGACCTCCAGCCACTTGTGTCAATTAGTTGTCTGCACCTCACATGTCACATATCAGCATGCTG  
ATCTTGCCTTTTTCAACAACCCAATTAGGTTGTCTGCTATATAAGGTTTTGCTATTCATTGAAAGCAG  
TAGTGACTGATTTGTATATA

>MinSyn\_1975|Strength:0.013672905

GCGTGTGTTTTAGTGAGGCTGACGTAAGGGATGACGCACACTGGTACTTGTGTACAGTGGTGGAGCA  
CGACAAGGGCTCACTGTCTCTCTGCCGACAGTGGTCCCAAACATGTAGATCGAAAGGACAGTACTTGG  
GAAAAAGAAGAGTTGCTGATCTTGCTGCCTTGATGAAACCACGTCTACAAATCTTGCCAGGTGGCT  
CCTACTGTAGGCTATCAGCTTAGCAAGACCTCTACCTATATAAGGTTTTGCTATTCATTGAAAGCAGT  
AGTGACTGATTTGTATATA

>MinSyn\_1402|Strength:0.013690818

GCGTGTGTTTTAGTGAGGATGACGTAAGCCATGACGTCTAGCCCAATTAGGTTGTCTGCACCTCACA  
TTATGACCCCCGCCGATGACGCGGGATCAGCTTAAAAAATGTCAAAGATAGTCTGCACCTCACATGTA  
GGCTATCAGTGAAGCATCTTCCCCTCTACAAAACCTGATCGAAAGGACAGTAATGCTGATCTTAGCAAG  
TGGATAGGTTGTCTGCACCTCACATGTAGGCTACTATATAAGGTTTTGCTATTCATTGAAAGCAGTAG  
TGACTGATTTGTATATA

>MinSyn\_1200|Strength:0.014244046

GCGTGTGTTTTAGTGAGGTCCATCAACAAATAATCCAAGTAAGACTTGTGTACTGAAGATAAGATAA  
TAATGTTGAAGATAAGACTAGGAGCTGACGTAAGGGATGACGCACACTGATCTTGCCTCAAAATATTC  
TTGTTCACTGCTAGGAGGCACACCAGCATGTGTTGATCACCAGCTCAGCTTAGCAAGACCTCTAAACC  
ATTATTGCGCACGACCACTATGCAGCCACTTGTGTGCACCTCACATGTATCACTATCAGCAGGTTGTC  
TGCACCTCACATGTAGGCTATATAAGGTTTTGCTATTCATTGAAAGCAGTAGTGACTGATTTGTATAT  
A

>MinSyn\_1759|Strength:0.014334976

GCGTGTGTTTTAGTGAGGTCAGAAGATCAAAGGGCTAGCGGTAGGTCACGACCACTATGCCCACTGA  
CGTAAGGGATGACGCACACGGTAGGTCACGACCACTATGCTCACTATCAGTACTTGTGTACAGGGCT  
CACTGCTTCCATCAACAAATAATCCAAGTAAGCTTAGCAAGACCTTATGACCCCCGCCGATGACGCGG  
GAGGTTGTCTGCACCTCAAAGATTGATGAAAAGTCAAAAACAAAATCAATTATTCACGACCACTCTA  
TATAAGGTTTTGCTATTCATTGAAAGCAGTAGTGACTGATTTGTATATA

>MinSyn\_1551|Strength:0.014474524

GCGTGTGTTTTAGTGAGGTGAAGATAAGATAATAATGTTGAAGATAAGAGCACCTCACATGTAGGCT  
ATCAGCTTAGCACAAATATTTCTTGTGGAGGACCGATGCTGATCTCTCTGCCGACAGTGGTCCCAAAC  
TGATCTTAGGTGGCTCCTACTAGGCTAATTGCGATAAAGGAAAGGGTCTGCACCTCACATGTAGGCTG  
ACGTAAGGGATGACGCACAAGACCTCTACAAAACCTGGTACTTGTGTCCATCAACAAATAATCCAAGTA  
AGACATGTAGGCTATCAGCTTAGCAAGAAAAATGTCAAAGATAGGTAGGTCACGACCACTATGCCCAA  
TTAGGTGGGAGCCACCACTGATCTTGTATATAAGGTTTTGCTATTCATTGAAAGCAGTAGTGACTGA  
TTTGTATATA

>MinSyn\_1760|Strength:0.01451124

GCGTGTGTTTTAGTGAGGTCCATCAACAAATAATCCAAGTAAGAGGCTATCAGCTGAAGCATCTTCC  
TGATCTTGCCTGCCTTGATGATTGCGATAAAGGAAAGGGGCTGTGGGAGCCACCACTAGGAGGACATG  
ACGTAAGCCATGACGTCTATGAAGATTGATGAAAAGTCAAAAACAAAATCAATTATAGCACACCAGC  
ATGTGTTGATCACCAGCTGGTAGGTCACGACCACTATGCCCAGGAAAAAGAAGAGGTTGCCCAATTAG  
GTTGTCTGAACCACGTCTACAATGGTACTTGTGTACAGGGCTCACTCTATATAAGGTTTTGCTATTC



TTGAAAGCAGTAGTGACTGATTTGTATATA  
>MinSyn\_1261|Strength:0.014567139  
GCGTGTGTTTTAGTGAGGATCGAAAGGACAGTAGCAAGACCTCTACAAAAGTGGTACTTGCAGCCAC  
TTGTGTCGGTAGGTACAACCATTATTGCGCCTCACATGTAGGCTATCAGCTTAGCCTGACGTAAGGG  
ATGACGCACAAGGTCACGACCAGTGGTCCCTCCACTCACTGCTAGGAGGGAAAAAGAAGAGGTTTACG  
AAGATTGCGATAAAGGAAAGGACCGATGCTGATCTTGCTGCCTTGATTCATCAGCTCTGCACCT  
CACATGTAGGTGGCTCCTACTACTTGTGTACAGGGCTCTATATAAGGTTTTGCTATTCATTGAAAGCA  
GTAGTGACTGATTTGTATATA

>MinSyn\_1636|Strength:0.014658457  
GCGTGTGTTTTAGTGAGGAACCATTATTGCGGGTACTTGTGTACGGAAAAAGAAGAGGTTTGTCTGC  
ACCTCACATCACTATCAGCATTAGGTTGTCTGCACCTCACAGTGGTCCCTCCACACTATGCCCAATTA  
GGTTGTCTCAGCCACTTGTGTGTAGGCTAATGAGCTAAGCACATACGTCAGACCTCACATGTAGGCTA  
TCAGCTTATCGAAAGGACAGTAATGTAGGCTATCAGCTTAGCTCTCTCTGCGGACAGTGGTCCCAAAG  
GTAGGTCACGACCACTATGCAAATATTTCTTGTGCGGTAGGTCACGACCACCTATATAAGGTTTTGCT  
ATTCATTGAAAGCAGTAGTGACTGATTTGTATATA

>MinSyn\_1853|Strength:0.014973143  
GCGTGTGTTTTAGTGAGGGTGGGAGCCACCAGGAGGACCGATGCTGATCTTTGAAGATAAGATAATA  
ATGTTGAAGATAAGACCGATGCTGATCTTGCTGCCTTGCCATCAACAAATAATCCAAGTAAGATCT  
TGCCTATGACGTAAGCCATGACGTCTATCTACAAAAGTGGTACTTGGAAAAAGAAGAGGTCCAATTAG  
GTTGTCTGCACCTGGTGGAGCACGACGCGGTAGGTCTCTCTCTGCGGACAGTGGTCCCAAATGTAGG  
CTATCAGCTTAGCAAGACCTAATTTGCGGAAACCTCCTCGGACCACTCTATATAAGGTTTTGCTATT  
CATTGAAAGCAGTAGTGACTGATTTGTATATA

>MinSyn\_1955|Strength:0.015018225  
GCGTGTGTTTTAGTGAGGTCCATCAACAAATAATCCAAGTAAGGCTTAGCAAGACCTCTACAAAAGT  
GGTACTTGAAGATAAGATAATAATGTTGAAGATAAGAGACCACTATGCCCAATTAGGTTGCTCTGACG  
TAAGGGATGACGCACAGCAAGACCTCTACAAAAGTGGTACTTGTTCAGAAGATCAAAGGGCTACGACC  
ACTATGCCCAATTAGGTTGTTGAAGCATCTTCCCTAGGAGGACCGATGCTGATCTTGCCAGCAAGTGG  
ATTAGGCTATTGCGATAAAGGAAAGGCTTAGCAAGACCTATATAAGGTTTTGCTATTCATTGAAAGCA  
GTAGTGACTGATTTGTATATA

>MinSyn\_1754|Strength:0.015468922  
GCGTGTGTTTTAGTGAGGTGAAGATAAGATAATAATGTTGAAGATAAGAGCCCAATTAGGTTGTCAG  
AAGATCAAAGGGCTACGATGCTGATCTTGCTGCCTTTCACTATCAGCTACAAAAGTGGTATGACGTA  
AGCCATGACGTCTACTCACGCTTTGTCAAAAAGCTAAAAAGATGATGCCCTCTACAAAAGTGGTACTT  
GTGTACCAAATATTTCTTGTAGGTTGTCTGCACCTCACATGTAGGTCTCTCTGCGGACAGTGGTCCCA  
AAACCACTATGCCCAATTAGGTTGTCTGCACCCTATATAAGGTTTTGCTATTCATTGAAAGCAGTAGT  
GACTGATTTGTATATA

>MinSyn\_1635|Strength:0.015540591  
GCGTGTGTTTTAGTGAGGATTGCGATAAAGGAAAGGGAGGACCGATGCTGATCTTGCTGCCTGCTGAAGC  
ATCTTCCATGCCCAATTAGGTTGTCTGCAGCTTTGTCAAAAAGCTAAAAAGATGATGCCACTGTGAA  
GATAAGATAATAATGTTGAAGATAAGAACTGCTAGGAGGACCGATGCTGATATGACGTAAGCCATGAC  
GTCTATATCAAACCATTATTGCGCATGTAGGCTATCAGCTTAGAATTTGCGGAAACCTCCTCGTGCTG  
ACAGTGGTCCCTCCACATGTAGGCTATCAGCTTAGCAAGACTTATGACCCCCGCCGATGACGCGGGAA  
CCTCACATCTATATAAGGTTTTGCTATTCATTGAAAGCAGTAGTGACTGATTTGTATATA

>MinSyn\_1896|Strength:0.015933681  
GCGTGTGTTTTAGTGAGGAAGATTGATGAAAAGTCAAAAACAAAATCAATTATGGTACTTGTGTAC  
AGGGCTCACTGCTATGAGCTAAGCACATACGTCAGTTATCGAAAGGACAGTACTCACATGTAGGCTAT  
CTCCATCAACAAATAATCCAAGTAAGCTAGGAGGACCGATGTCTCTCTGCGGACAGTGGTCCCAAACC  
ACTATGCAAATATTTCTTGTCTGCTAGGAGGACCGATGCTGATCTTGCTCTATATAAGGTTTTGCTA  
TTCATTGAAAGCAGTAGTGACTGATTTGTATATA

>MinSyn\_1665|Strength:0.016143435  
GCGTGTGTTTTAGTGAGGAAGATTGATGAAAAGTCAAAAACAAAATCAATTATGCTGATCTTTGAA  
GCATCTTCCATGCCCAATTAGGTTGTCTCAAATATTTCTTGTGTTGCCCAATTAGGTTGTCTGCACCTCA  
CATGCTTTGTCAAAAAGCTAAAAAGATGATGCGTTGTCTGCACCTCACATGTAGGCTATCAGATGACG  
TAAGCCATGACGTCTACAGCTTAGCAAGACCTCTACAAATCAGAAGATCAAAGGGCTATACAGCCACT

TGTGTGACCACTAAAAATGTCAAAGATATGTGAAGATAAGATAATAATGTTGAAGATAAGATACAAAA  
CTGGTACTTGTCTATATAAGGTTTTGCTATTTCATTGAAAGCAGTAGTGACTGATTTGTATATA

>MinSyn\_1730|Strength:0.016314165

GCGTGTTCGTTTTAGTGAGGTGAAGCATCTTCCAGCTTAGCAAGAAAAATGTCAAAGATACAAACTG  
GTATTATGACCCCGCGGATGACGCGGGAATGTAGGCTATCAGCTCTGACGTAAGGGATGACGCACAT  
CAGCTTAGCAGTGGTCCCTCCACCGATGCTGATCTTGCCTAGCAAGTGGATTGCTAGGAGGACCGCAG  
CCACTTGTGTATCTTGCCTGCCTTATGATACAAATATTTCTTGTATGCCCAATTAGGTTGTCTATCG  
AAAGGACAGTACACATGCTATATAAGGTTTTGCTATTTCATTGAAAGCAGTAGTGACTGATTTGTATAT  
A

>MinSyn\_1292|Strength:0.016341363

GCGTGTTCGTTTTAGTGAGGGCTTTGTCAAAGCTAAAAAGATGATGCGTAGGTCACGACCACTATGC  
CCAATTAAGCAAGTGGATAGGAGGCTGACGTAAGGGATGACGCACACCTCTACAAAAGTGGTACTTGT  
GTACAGGGTGAAGCATCTTCCGCGGTAGGTCACGACCACTATGCCCTGGTGGAGCAGACAACAAATA  
TTTCTTGTTCCTACTATCAGCTGTACAGAAAAATGTCAAAGATACTCACATGTAGGCTATCAGCTTAGC  
AACTATATAAGGTTTTGCTATTTCATTGAAAGCAGTAGTGACTGATTTGTATATA

>MinSyn\_1221|Strength:0.01658346

GCGTGTTCGTTTTAGTGAGGAACCATTATTGCGTAGCAAGACCTCTACAAAAGTGGAGCAAGTGGATTA  
ATGAGCTAAGCACATACGTCAGCGACCACTATGCCCAATCTCTCTGCCGACAGTGGTCCCAAAGCTGT  
GAAGCATCTTCCGCGGTAGGTCACGACCACTATGCCCAGCACACCAGCATGTGTTGATCACCAGCTTA  
GGAGGAATCGAAAGGACAGTATCACATGTAGGCTATCCTATATAAGGTTTTGCTATTTCATTGAAAGCA  
GTAGTGACTGATTTGTATATA

>MinSyn\_1307|Strength:0.016676953

GCGTGTTCGTTTTAGTGAGGATTGCGATAAAGGAAAGGGGAAGCAAGTGGATCAAACTGGTACTTGTG  
TACAGGGTCCATCAACAAATAATCCAAGTAAGACTAATGAGCTAAGCACATACGTCAGACCACTATGC  
CCAATTAGAACCACGTCTACAATATCAGCTTAGCAAGACCTCTACAAAGGAAAAAGAAGAGGTTGTCT  
GCACCTCACATGTAGGCTATCAATTTCCGGAAACCTCCTCGAAGACCTCTACAAAAGTGGTCTATATA  
AGGTTTTGCTATTTCATTGAAAGCAGTAGTGACTGATTTGTATATA

>MinSyn\_1858|Strength:0.016710046

GCGTGTTCGTTTTAGTGAGGCAGCCACTTGTGTCTTGTGTACAGGGCTCACTGCTAGGAGGACCTGACG  
TAAGGGATGACGCACAGTACAGGGCTCACTGCTAGGAGGACCGAAAAATGTCAAAGATAAGGACCCA  
AATATTTCTTGTGTAGGCTATCAGCTTAGCAAGATTATGACCCCGCGGATGACGCGGGACGATGCTG  
ATCTTGCCTGCTTGTCAAAGCTAAAAAGATGATGCTGTCTGCACTATATAAGGTTTTGCTATTCA  
TTGAAAGCAGTAGTGACTGATTTGTATATA

>MinSyn\_1408|Strength:0.016719292

GCGTGTTCGTTTTAGTGAGGAACCATTATTGCGCACGACCACTATGCCCGAAAAAGAAGAGGTCGATG  
CTGATCTTGCCATGACGTAAGCCATGACGTCTACTTAGCAAAAATGTCAAAGATAACAAAAGTCACTA  
TCAGCTCACTGCTAGGAGGACCGAAGATTGATGAAAAGTCAAAAACAAAATCAATTATGTACTTATG  
ACCCCGCCGATGACGCGGGATTGTCTGCTTTTCAACAAGCGGTAGGTCACGACCACTATGCTATATA  
AGGTTTTGCTATTTCATTGAAAGCAGTAGTGACTGATTTGTATATA

>MinSyn\_1988|Strength:0.016891437

GCGTGTTCGTTTTAGTGAGGTCCATCAACAAATAATCCAAGTAAGTATGACGTAAGCCATGACGTCTA  
AGGTCCTCTCTGCGGACAGTGGTCCCAAATACAAAAGTGGTACCAAATATTTCTTGTAGGCTATC  
AGCTTAGCAATTGCGATAAAGGAAAGGAAAAGTGGTACAGCCACTTGTGTTACGACCACTATGCCCA  
ATTGCACACCAGCATGTGTTGATCACCAGCTATCTTGTATATAAGGTTTTGCTATTTCATTGAAAGCA  
GTAGTGACTGATTTGTATATA

>MinSyn\_1163|Strength:0.016977389

GCGTGTTCGTTTTAGTGAGGATGACGTAAGCCATGACGTCTATTGTCTGCACCTCAGTGGGAGCCACCA  
ACGACCACTATGCCCAATTAGGTTGTCTGCAGCAAGTGGATTCTACAAAAGTGCAGCCACTTGTGTGT  
TCCATCAACAAATAATCCAAGTAAGCACGACCACTATGCCCAATTAGGTTGTGAAAAAGAAGAGGTT  
CGCGGTAGGTCACGACCTATATAAGGTTTTGCTATTTCATTGAAAGCAGTAGTGACTGATTTGTATATA

>MinSyn\_1565|Strength:0.016986154

GCGTGTTCGTTTTAGTGAGGATGACGTAAGCCATGACGTCTACGCGGTAGGTCACGACCACTATGTGGT  
GGAGCACGACAAGACCTCTACAAAAGCACGTCTACAATTAGCAAGACCTCTACAAAAGTGGTACTTA  
ATTTCCGGAAACCTCCTCGTGTAGTGAAGCATCTTCCAGGTTGTCTGATCCTTACCCTATGGGTAAG

ATTTTAGGTTGTCTGCACTATATAAGGTTTTGCTATTCATTGAAAGCAGTAGTGACTGATTTGTATAT  
A

>MinSyn\_1521|Strength:0.017043856

GCGTGTTCGTTTTAGTGAGGTCTCTGCGGACAGTGGTCCCAAAGTAGGTCACGACCACTATGCCCAA  
TTAGGATGACGTAAGCCATGACGTCTATGCTAGGAGGACCGATGCTGATCTTCAGTGGTCCCTCCACT  
TAGCAAGACCTCTACAAAAGTGGTACTGCTTTGTCAAAGCTAAAAAAGATGATGCCACATGTAGGCT  
ATCAGCTTTTATGACCCCCGCCGATGACGCGGGAGCGGTAGGTCACGACCACTATATAAGGTTTTGCT  
ATTCATTGAAAGCAGTAGTGACTGATTTGTATATA

>MinSyn\_1302|Strength:0.017051622

GCGTGTTCGTTTTAGTGAGGTGAAGCATCTTCCACTCCATCAACAAATAATCCAAGTAAGGGGCTCACT  
GCATGAGCTAAGCACATACGTGAGTGTCTGCACCTCACATGTAGGCTATCAGCATTGCGATAAAGGAA  
AGGCCACTATGCCCAATTAGGTCAGTGGTCCCTCCACTAGGAGGACCGATGGCTTTGTCAAAGCTAA  
AAAAGATGATGCACCTCTACAAAAGTGGTACTTCTATATAAGGTTTTGCTATTCATTGAAAGCAGTAG  
TGACTGATTTGTATATA

>MinSyn\_1783|Strength:0.017141418

GCGTGTTCGTTTTAGTGAGGCAGTGGTCCCTCCACTGTCTGCACCTCACAACCATTATTGCGAGACCAT  
CGAAAGGACAGTAAGATGAGCTAAGCACATACGTGAGTAGGCTATCAGCTTAGAGGTGGCTCCTACTG  
CTAGGAGGACCGATGCTGATCTTGCCTAACACGTCTACAAGTGGTACTTGTGTACAGGGCTCACTGC  
TAGGGAAAAAGAAGAGGTAGGTCACGATGAAGCATCTTCCCTAGGCTATATAAGGTTTTGCTATTCATT  
GAAAGCAGTAGTGACTGATTTGTATATA

>MinSyn\_1428|Strength:0.017308183

GCGTGTTCGTTTTAGTGAGGCAGCCACTTGTGTACAAAAGTGGTACTTGTGTACAGGGCTGGAAAAAGA  
AGAGGTGTAGGCTATCCAGTGGTCCCTCCACGCTAGGAGGACCGATGCTGATCTTGCCTGCTGACGTA  
AGGGATGACGCACATGCCTGCAACCATTATTGCGGTTGTCTGCACCTCACATGTAGGCAAAAATGTCA  
AAGATAGCTAAATTTTCGGGAAACCTCCTCGATGCTTCCATCAACAAATAATCCAAGTAAGTCTACAAA  
ACTGGTACTTGTGTACAGGGCTCTATATAAGGTTTTGCTATTCATTGAAAGCAGTAGTGACTGATTTG  
TATATA

>MinSyn\_1037|Strength:0.017312637

GCGTGTTCGTTTTAGTGAGGCAAATATTTCTTGTAGGCTATCAGCATTGCGATAAAGGAAAGGTTGGTG  
GAGCACGACATGCACCCAGCCACTTGTGTACATGTAGGCTATCAGCTTAGCAAGACCTCAACCATTAT  
TGCGCTCACATGTAGGCTATATGACGTAAGCCATGACGTCTAATTAGGTTGTCTGCACCAGGTGGCTC  
CTACACCGATGCTGATCTTGCACACCAGCATGTGTTGATCACCAGCTGGTTGTCTGCACCTTTATGAC  
CCCCGCCGATGACGCGGGATACTTGTGTACAGGGCTCACTGCTATATAAGGTTTTGCTATTCATTGAA  
AGCAGTAGTGACTGATTTGTATATA

>MinSyn\_1147|Strength:0.01733475

GCGTGTTCGTTTTAGTGAGGAGGTGGCTCCTACGTAGGCTATCAGCTTAGCAAGACCTCTAGCTTTGTC  
AAAAGCTAAAAAAGATGATGCTGTAGGCTATCAGCTATGAGCTAAGCACATACGTGAGGTTGTCTG  
CACCTCACATCCATCAACAAATAATCCAAGTAAGATGCCCAATTAGGTTGTCTGCAACCATTATTGC  
GGACCACTATGCCCAATTTGGTGGAGCACGACAGCCAATTAGGTTGTCTGCACCTCCTATATAAGGT  
TTTGTATTCATTGAAAGCAGTAGTGACTGATTTGTATATA

>MinSyn\_1517|Strength:0.017570124

GCGTGTTCGTTTTAGTGAGGAACCATTATTGCGGAGGACCGATGCTGATCTTGCCTGCCTTGAACCAG  
TCTACAAAGCTTTGTCAAAGCTAAAAAAGATGATGCCCGATGCTGATCTTGCCTTTTTCAACAAAGC  
AAGACCTCTACAAAAGTGGTACTTCTGACGTAAGGGATGACGCACAGACCACTATGCCCAATTAGGTT  
CAAATATTTCTTGTATTAGGGAAAAAGAAGAGGTCTAGGAGGACCGATGCTGATCTATCCTTACCCT  
ATGGGTAAGATTGGAGGACCGATGCTGATCTTGCCTGCCTCTATATAAGGTTTTGCTATTCATTGAA  
GCAGTAGTGACTGATTTGTATATA

>MinSyn\_1663|Strength:0.017581133

GCGTGTTCGTTTTAGTGAGGTCAGAAGATCAAAGGGCTATCTACAAAAGTGGTACGCACACCAGCATGT  
GTTGATCACCAGCTCACATGTAGGCTACAGCCACTTGTGTATTATGACCCCCGCCGATGACGCGGGAT  
AGGTTGTCTGCACCTCAGTGGTCCCTCCACGTGTACAGCTGACGTAAGGGATGACGCACATCGCGGTA  
GGTCACGGCTTTGTCAAAGCTAAAAAAGATGATGCTCTACAAAAGTGGTACTTGTGTAAAAATGTCA  
AAGATATCTTGAACCATTATTGCGACCTCACATGTAGGCTATCAGCTTACTATATAAGGTTTTGCTA  
TTCATTGAAAGCAGTAGTGACTGATTTGTATATA

>MinSyn\_1943|Strength:0.017657967  
GCGTGTTCGTTTTAGTGAGGTCTCTCTGCCGACAGTGGTCCCAAACAGGGCTCACTGTGGTGGAGCAC  
GACATATCCTTACCCTATGGGTAAGATTGTACAATGAGCTAAGCACATACGTCAGCGCGGTAGGTCA  
CGACCGTGGGAGCCACCAAGGACCGATGCTGATCTTGCCTGCAGTGGTCCCTCCACGTGTATCACTAT  
CAGCTAGGTCACGACCATTTTTCAACAACCTGCCTTGATGAAACCATTATTGCGTGCCCTATATAAGGTT  
TTGCTATTCATTGAAAGCAGTAGTGACTGATTTGTATATA

>MinSyn\_1744|Strength:0.017707944  
GCGTGTTCGTTTTAGTGAGGTTTTCAACAACCTTAGCAAGACCTCTACAAAACCTGGTACTTGGAAAAAGA  
AGAGGTGCACCACTATGCCCAATAAAAAATGTCAAAGATACTATGACGTAAGCCATGACGTCTACTCAC  
TGCTAGGAGCAGTGGTCCCTCCACTCACATCAAATTTTTCTTGTAACCTCTCTGCCGACAGTGGTCC  
CAAAGGAGGACCGATGCTGATCTTGCCTGCCTCAGAAGATCAAAGGGCTAGGTAAGCAAGTGGATGT  
AGGTCATATATAAGGTTTTGCTATTCATTGAAAGCAGTAGTGACTGATTTGTATATA

>MinSyn\_1912|Strength:0.017786435  
GCGTGTTCGTTTTAGTGAGGTCCATCAACAAATAATCCAAGTAAGCTCACATGTAGGCTATAGGTGGCT  
CCTACGTAGGTCACGACCACTGGTGGAGCACGACACCTCTACGTGGGAGCCACCACACCTCACATGTA  
GGCTGACGTAAGGGATGACGCACAGGCTATCAGCTGCACACCAGCATGTGTTGATCACCAGCTCGCGG  
TAGGTCACGACCACTATGGGAAAAAGAAGAGGTGGCTCACTGCTAGGAGAAAAATGTCAAAGATATGT  
GTACAGGGCTCACTGCTAGGAGGACCTATATAAGGTTTTGCTATTCATTGAAAGCAGTAGTGACTGAT  
TTGTATATA

>MinSyn\_1059|Strength:0.017803154  
GCGTGTTCGTTTTAGTGAGGGTGGGAGCCACCAAGGACCGATGCTGATCTGACGTAAGGGATGACGCAC  
ATCTACAAAACCTGGTACTTGTGTACTTATGACCCCGCGGATGACGCGGGATTGCCTGCCTTTGAAGC  
ATCTTCCTAGGTCACCAAGTGGTCCCTCCACTGATATTTTCAACAATTGTGTACAGGGCTCATCCTTAC  
CGCTATGGGTAAGATTAACTGGTACTTGTGTCTATATAAGGTTTTGCTATTCATTGAAAGCAGTAGT  
GACTGATTTGTATATA

>MinSyn\_1758|Strength:0.018013979  
GCGTGTTCGTTTTAGTGAGGAAGATTGATGAAAAGTCAAAAACAAAATCAATTATCTCCATCAACAAA  
TAATCCAAGTAAGACATGTAGGCTATCAGCTTAGCAAAAAATGTCAAAGATAGGGCTCACTGCTAGG  
AGGTGAAGCATCTTCCGACCTCTACAAAACAACCATTATTGCGAGGTTGTCTGCACCCTGACGTAAGG  
GATGACGCACATATGCCCATGAAGATAAGATAATAATGTTGAAGATAAGACGGTAGGTCACGACCACT  
ATGCCCGCTTTGTCAAAAAGCTAAAAAAGATGATGCACAGGGCTCACTGCTAGGAGGACCTATATAAG  
GTTTTGCTATTCATTGAAAGCAGTAGTGACTGATTTGTATATA

>MinSyn\_1790|Strength:0.018026655  
GCGTGTTCGTTTTAGTGAGGATTGCGATAAAGGAAAGGAAGACCTCTACAAAACCTGGTACTTGTGTAAT  
GAGCTAAGCACATACGTCAGTTGTCTGCACCTCAAGATTGATGAAAAGTCAAAAACAAAATCAATTA  
TCTGATCTTGCCTGCAAAAATGTCAAAGATATCGCGGTAGGTCACGACCTCCATCAACAAATAATCCA  
AGTAAGTAGGTTGTCTGCACCTCACATGCTATATAAGGTTTTGCTATTCATTGAAAGCAGTAGTGACT  
GATTTGTATATA

>MinSyn\_1515|Strength:0.018079662  
GCGTGTTCGTTTTAGTGAGGATGAGCTAAGCACATACGTCAGCTATGCCCAATTAGGTTGTCTGAAAAA  
TGTCAAAGATAGTACTCACTATCAGCGTAGGCTATCAGCTTAGCAAGAGGTGGCTCCTACATCTTGCC  
TGCCTTCAAATATTTCTTGTTGCTGATCAACCATTATTGCGACCTCACATGTAGGCTATCAGCTATAT  
AAGGTTTTGCTATTCATTGAAAGCAGTAGTGACTGATTTGTATATA

>MinSyn\_1617|Strength:0.018431341  
GCGTGTTCGTTTTAGTGAGGTGGTGGAGCACGACAACTGGTACTTGTGTACAGGGCTCATGAGCTAAG  
CACATACGTCAGTCAATGACGTAAGCCATGACGTCTACGCGGTAGGTCTCTCTCTGCCGACAGTGGTC  
CCAACTTAGCAAGACCTCTAAACCACGTCTACAATTGTGTAAGGTGGCTCCTACCGCGGTAGGGGAA  
AAAGAAGAGGTCAATTAGGTTGTCTGCACCTCACATGTAGGTTTTCAACAATGGTACTTGTGTACAGG  
GCTCACTGCTAGGTGGGAGCCACCAGTCTATATAAGGTTTTGCTATTCATTGAAAGCAGTAGTGACTG  
ATTTGTATATA

>MinSyn\_1058|Strength:0.018480717  
GCGTGTTCGTTTTAGTGAGGTGGTGGAGCACGACATAGGTTGAGCAAGTGGATGGACCGATGCTGATCT  
TGCCTGCCTTGATTCACTATCAGCCTGATCTTGCCTGCCTTGAATGACGTAAGCCATGACGTCTATAG  
GCTATCAGCTTAGCAAGACCTCTAAGGTGGCTCCTACACCACCTATGCCCAATTAGGTTGTCTGCATCG

AAAGGACAGTAAGCAAGACCTCTACAAAACCTGTGAAGATAAGATAATAATGTTGAAGATAAGAAGACC  
TCCTATATAAGGTTTTGCTATTCATTGAAAGCAGTAGTGACTGATTTGTATATA

>MinSyn\_1398|Strength:0.018508868

GCGTGTGTTTTAGTGAGGTCAGTATCAGCGATCCTTACCGCTATGGGTAAGATTTAATCGAAAGGAC  
AGTACTTGTGTACAGGGCATGAGCTAAGCACATACGTCAGACTTGTCTCTCTGCCGACAGTGGTCCC  
AAAGTTGTCTGCACCTCACATGTAGGCCAGCCACTTGTGTACCTCACATGTAGGCTATTGAAGATAAG  
ATAATAATGTTGAAGATAAGACTTAGCAAGACCTCTACAACCTATATAAGGTTTTGCTATTCATTGAAA  
GCAGTAGTGACTGATTTGTATATA

>MinSyn\_1403|Strength:0.018577837

GCGTGTGTTTTAGTGAGGAAAAATGTCAAAGATATACAAAACCTGGTACTTGTGTACAGGGCTGACGT  
AAGGGATGACGCACACTATCAGCTTAGCAATGACGTAAGCCATGACGTCTAAATTAGGTTGTCATCCT  
TACCGCTATGGGTAAGATTCCTCTACAAAACAGGTGGCTCCTACGTAAGTGTGTACAGGGCTCACTGC  
TAGGAGGTGGGAGCCACCATCTGCACCTCACACAAATATTTCTTGTAAAGACCTCTACAAAACCTGGTAA  
GATTGATGAAAAGTCAAAAACAAAATCAATTATAGGCTATTCACTATCAGCCTCACTGCTAGGAGGA  
CCGATGCTGATCCTATATAAGGTTTTGCTATTCATTGAAAGCAGTAGTGACTGATTTGTATATA

>MinSyn\_1017|Strength:0.018651377

GCGTGTGTTTTAGTGAGGAGGTGGCTCCTACGTAGGTCACGACCACTATGCCAGCCACTTGTGTAGG  
ACCGAGCACACCAGCATGTGTTGATCACCAGCTCCACTATGCCCAATTAGCTGACGTAAGGGATGACG  
CACACTTGCCTGCCTTTGGTGGAGCAGCAGCAGTGGTCCCTCCACCAAGACCTCTACAAAACCTGGT  
ACTTGTGTTGAAGATAAGATAATAATGTTGAAGATAAGAATGCTGATCTTGCCTGCCTTGAGCAAGTG  
GATAGGCTATATAAGGTTTTGCTATTCATTGAAAGCAGTAGTGACTGATTTGTATATA

>MinSyn\_1391|Strength:0.019058547

GCGTGTGTTTTAGTGAGGCTGACGTAAGGGATGACGCACACGCTTATGACCCCCGCCGATGACGCGG  
GAGCACCTCACATGTAGGCTATCAGCTTAGCAATTCGGGAAACCTCCTCGTCAGCTTAGCAAGACCT  
CTACAAAACCTGGTAAGATTGATGAAAAGTCAAAAACAAAATCAATTATCCGATGCTGTCACTATCAG  
CATGCTGCTATATAAGGTTTTGCTATTCATTGAAAGCAGTAGTGACTGATTTGTATATA

>MinSyn\_1835|Strength:0.019176719

GCGTGTGTTTTAGTGAGGTCAGAAGATCAAAGGGCTACGCGGTAGGTCACGACCACTATGCCCAATT  
ATCCTTACCGCTATGGGTAAGATTTGTAGGCTATCAGCTTAGCAAGACCTCTAAATTCGGGAAACCT  
CCTCGCTTCACTATCAGCTTGATGATGACGTAAGCCATGACGTCTACCAATTGTGGGAGCCACCACT  
ATGCCCAATTAGGTTGTCTGCACCTAACACGTCTACAAGCTTAGCAAGACCTCTACAAAACCTGCAGC  
CACTTGTGTGGTAGGTCACGACCACTATGCCTATATAAGGTTTTGCTATTCATTGAAAGCAGTAGTGA  
CTGATTTGTATATA

>MinSyn\_1034|Strength:0.019263706

GCGTGTGTTTTAGTGAGGATGAGCTAAGCACATACGTCAGTAGGTTTGCATAAAGGAAAGGCAAA  
ACTGGTACTAAGATTGATGAAAAGTCAAAAACAAAATCAATTATCGATGCTGATCTTGCCTGTCCAT  
CAACAAATAATCCAAGTAAGACGAATTCGGGAAACCTCCTCGGCCAATTAGGTTGTCTATATAAG  
GTTTTGCTATTCATTGAAAGCAGTAGTGACTGATTTGTATATA

>MinSyn\_1603|Strength:0.019577595

GCGTGTGTTTTAGTGAGGGCACACCAGCATGTGTTGATCACCAGCTTACAGGGCTTGGTGGAGCAGC  
ACACCCAATTAGGTATGACGTAAGCCATGACGTCTATATGCCCAATTAGGTTGTCTTCCATCAACAAA  
TAATCCAAGTAAGTCGCTTTGTCAAAAAGCTAAAAAGATGATGCTCACTGCTAGGAGGACCGATGCTG  
ATCTTGAAAAAGAAGAGGTACGACCACTATGCCCAATTAGGTTCTATATAAGGTTTTGCTATTCATTG  
AAAGCAGTAGTGACTGATTTGTATATA

>MinSyn\_1608|Strength:0.019584039

GCGTGTGTTTTAGTGAGGTGGTGGAGCACGACATTGTGTATTATGACCCCCGCCGATGACGCGGGAG  
CTAGGAGGAATGACGTAAGCCATGACGTCTATATCAGCTTAGCAAGACCTCTACAAAATCCATCAACA  
ATAATCCAAGTAAGGGCTATCAGCTTAGCCAGCCACTTGTGTTGTCTGCAATTGCGATAAAGGAAAG  
GTGCACCTCACATGTAGGCTATCATGAAGCATCTCCCTGGTCTATATAAGGTTTTGCTATTCATTGA  
AAGCAGTAGTGACTGATTTGTATATA

>MinSyn\_1111|Strength:0.019819941

GCGTGTGTTTTAGTGAGGATCGAAAGGACAGTACCAATTAGGTTGTCTGCACCTCACATGTAGAAGA  
TTGATGAAAAGTCAAAAACAAAATCAATTATACTTGTGTACAGGGCTCACTGCTAGGAGGTCAGAAG  
ATCAAAGGGCTACACGACCACTATGCCCAATTAGGTTGTCCAGTGGTCCCTCCACCTGCTAGGAGCTG

ACGTAAGGGATGACGCACATACTTGTGTACAGGGCTCACTGCTAGTGGGAGCCACCATCACATGTAGG  
CACACCAGCATGTGTTGATCACCAGCTAGGCTATCAGCTTAGCAAGACCTCTACTATATAAGGTTTTG  
CTATTCATTGAAAGCAGTAGTGACTGATTTGTATATA

>MinSyn\_1802|Strength:0.020251865

GCGTGTTCGTTTTAGTGAGGAATTTTCGGGAAACCTCCTCGTTTTATGACCCCGCCGATGACGCGGGAGG  
TTGTCTGCACCTCACATGTAGCTGACGTAAGGGATGACGCACATACAAAACCTGGTACTGGTGGAGCAC  
GACAACAGGTGGCTCCTACAGGAGGACCGATGCTGAAAAGATTGATGAAAAGTCAAAAACAAAAATCAA  
TTATTGACAGCCACTTGTGTAAGACCTCTACAAAACCTGGTACTTGTGCTATATAAGGTTTTGCTATTC  
ATTGAAAGCAGTAGTGACTGATTTGTATATA

>MinSyn\_1917|Strength:0.020273035

GCGTGTTCGTTTTAGTGAGGAAGATTGATGAAAAGTCAAAAACAAAAATCAATTATGGTTCACTATCAG  
CGTACTTGTGTACAGGGCTCACTAATTTTCGGGAAACCTCCTCGGTACTTCAGAAGATCAAAGGGCTAC  
ATGTAGGCCTGACGTAAGGGATGACGCACACAAAACCTGGTACTTGTGTACAGGGCTATTGCGATAAAG  
GAAAGGAGCTTAGCAAGACCTCTACAAAAGCTTTGTCAAAGCTAAAAAAGATGATGCGCGGTAGAGC  
AAGTGGATACCCTATATAAGGTTTTGCTATTCATTGAAAGCAGTAGTGACTGATTTGTATATA

>MinSyn\_1274|Strength:0.02048127

GCGTGTTCGTTTTAGTGAGGATTGCGATAAAGGAAAGGTCTTGCCTGCCTTGATGACTGACGTAAGGGA  
TGACGCACACTACAAAACCTGATGAGCTAAGCACATACGTCAGCTGCACCTCACATTCTCTCTGCCGAC  
AGTGGTCCCAATGTCTGCACCTCACATGTACAGTGGTCCCTCCACGCTTAGCAAGACCTCTACTGGT  
GGAGCACGACAAAACCTGGTACTTGTGAATTTTCGGGAAACCTCCTCGCACTACAAATATTTCTTGTAGC  
AAGACCTCTACGAAAAAGAAGAGGTAATTAGTTGTCTATATAAGGTTTTGCTATTCATTGAAAGC  
AGTAGTGACTGATTTGTATATA

>MinSyn\_1786|Strength:0.020632702

GCGTGTTCGTTTTAGTGAGGTGAAGATAAGATAATAATGTTGAAGATAAGACACATGTAGAAAAATGTC  
AAAGATAGCAAGACCTCGCTTTGTCAAAGCTAAAAAAGATGATGCACCTCTCCATCAACAAATAATC  
CAAGTAAGCTCTACAAAACCTGGTACTTGTGTACAAACCATTATTGCGAGCTTAGCAAGACCTCTACAA  
AACTGGTATGACGTAAGCCATGACGTCTAGCAAATATTTCTTGTCTGGTACAGTGGTCCCTCCACCAA  
GACCTCTGCACACCAGCATGTGTTGATCACCAGCTCCACTATGCCCAATTAGGTTCTATATAAGGTTT  
TGCTATTCATTGAAAGCAGTAGTGACTGATTTGTATATA

>MinSyn\_1764|Strength:0.020639637

GCGTGTTCGTTTTAGTGAGGTGGTGGAGCAGCAGGGCTCACTGCTAGGAGGACATGACGTAAGCCAT  
GACGTCTATATGCCCAATTAGGTTGTCTGCAACCATTATTGCGTGTGTACAGGGTGGGAGCCACCAAT  
TAGGTTGTCTGCACCTTTTTCAACAAGCAAGACCTCTACAAAACCTGGTACTTGTGAATTTTCGGGAAAC  
CTCCTCGTATGCCCAATTAGCTATATAAGGTTTTGCTATTCATTGAAAGCAGTAGTGACTGATTTGTA  
TATA

>MinSyn\_1604|Strength:0.020644542

GCGTGTTCGTTTTAGTGAGGAAAAATGTCAAAGATACCCAATTAGGTTGTCTGCACCTCACATAGGTGG  
CTCCTACTAGGTACGACCACTATGCCCAATTAGGTAACCACGTCTACAATGATCTTGCCTGCCTTGA  
TGAATGACGTAAGCCATGACGTCTAGTAGGCTATCAGCTTAGCTGGTGGAGCAGCACAACCGATGCTG  
TGGGAGCCACCACTATCAGCTTAGCAAGACCTCTACAAAACGCTTTGTCAAAGCTAAAAAAGATGAT  
GCTATCTATATAAGGTTTTGCTATTCATTGAAAGCAGTAGTGACTGATTTGTATATA

>MinSyn\_1579|Strength:0.020700241

GCGTGTTCGTTTTAGTGAGGTGAAGATAAGATAATAATGTTGAAGATAAGAACAAAACCTGGTACTTGTG  
TACAGGGCTCACCAGTGGTCCCTCCACGTTGTCTGCACCTCACATGTAGGCTATATCGAAAGGACAGT  
AAGGTCACGACAAATATTTCTTGTGCTCACTGCTAGGAGGACCGATGCATGACGTAAGCCATGACGTC  
TAGATGCTGATCTTGCCTGTCAGAAGATCAAAGGGCTAGGTCACGACCACTATGCCCAATGAAGCATC  
TTCCCCTATCCTTACCCTATGGGTAAGATTCTCACACTATATAAGGTTTTGCTATTCATTGAAAGCA  
GTAGTGACTGATTTGTATATA

>MinSyn\_1158|Strength:0.020721356

GCGTGTTCGTTTTAGTGAGGATGACGTAAGCCATGACGTCTAAAGACCTCTACAGCTTTGTCAAAGCT  
AAAAAAGATGATGCTGCCCAATTGAAGATAAGATAATAATGTTGAAGATAAGAGACCACTATGCCCAA  
TTAGGTTGTAATTTTCGGGAAACCTCCTCGATTAGGTTTTGAAGCATCTTCCGATCTTGCCTGCCTTGT  
ATATAAGGTTTTGCTATTCATTGAAAGCAGTAGTGACTGATTTGTATATA

>MinSyn\_1942|Strength:0.020967183

GCGTGTGTTTTAGTGAGGATTGCGATAAAGGAAAGGTGCCTGCCAGGTGGCTCCTACCTGCACCTCA  
CATGTAGGCTATCAGCTTAATCGAAAGGACAGTATCACTATGACGTAAGCCATGACGTCTAACTGGTA  
CTTGTGTACATGAAGATAAGATAATAATGTTGAAGATAAGAGTCACTATCAGCTAGGAGGACAGCCAC  
TTGTGTCTGCTAGGAGGACCGACAAATATTTCTTGTTGTCTGCACCTCACATGTCTATATAAAGTTTT  
GCTATTCATTGAAAGCAGTAGTGACTGATTTGTATATA

>MinSyn\_1460|Strength:0.020970431

GCGTGTGTTTTAGTGAGGCTTTGTCAAAGCTAAAAAGATGATGCGACCTCTATCCTTACCGCTA  
TGGGTAAGATTGAGGACCGATGCTGAAATTTCCGGAAACCTCCTCGACAAAACCTCAGAAGATCAAAG  
GGCTACGGTAGGTACGACCACTATGCCCAATATCGAAAGGACAGTATGATCTTGCCTGACGTAAGGG  
ATGACGCACAGTAGGCTATCAGCTTAGCAAGACCTAACCATTATTGCGATCTTGCCTGCCTCAGCCAC  
TTGTGTTACAGGCAAATATTTCTTGTTGTCTAGCTTAGCCTATATAAAGTTTTGCTATTCATTGAAA  
GCAGTAGTGACTGATTTGTATATA

>MinSyn\_1925|Strength:0.020998491

GCGTGTGTTTTAGTGAGGTCAGAAGATCAAAGGGCTAACTGGTACTTGTGTACAGGGCTCACGGAAA  
AAGAAGAGGTACGACCACTATGCCCAATTAGGTAATTTCCGGAAACCTCCTCGTAAAAAATGTCAAAG  
ATAGTCACGACCACTATGCCCAGTGGTCCCTCCACGGTTGGTGGAGCACGACATCTTGCCTGCCTTGA  
TGATAATCGAAAGGACAGTATACAGGGCTCACTCTGACGTAAGGGATGACGCACATCACATGTAGGCT  
ATCAGCTTAGGCTTTGTCAAAGCTAAAAAGATGATGCTCACTGCTAGGAGGACCGATGCTGATCCT  
ATATAAGGTTTTGCTATTCATTGAAAGCAGTAGTGACTGATTTGTATATA

>MinSyn\_1724|Strength:0.021043932

GCGTGTGTTTTAGTGAGGTGAAGCATCTTCTTAGCAAGAATCGAAAGGACAGTAATTAGGTTAGGT  
GGCTCCTACTGCACCTCACATGTAGGCAATTTCCGGAAACCTCCTCGACTGGTTCACTATCAGCTCAG  
CCTGACGTAAGGGATGACGCACAACCTTGTGTACAGGTGGGAGCCACCAATGCCCAATTAGGTTGTCTG  
CAAACCATTATTGCGCACCTCACATGTAGGCATTGCGATAAAGGAAAGGACTGCTAGGAGGACCGATG  
CTGACTATATAAAGTTTTGCTATTCATTGAAAGCAGTAGTGACTGATTTGTATATA

>MinSyn\_1894|Strength:0.021058824

GCGTGTGTTTTAGTGAGGCTGACGTAAGGGATGACGCACATTGATGATAAGATTGATGAAAAGTCAA  
AAACAAAATCAATTATAAACTGGTACTTGTGGCACACCAGCATGTGTTGATCACCAGCTGCCCAAT  
TTCATATCAGCCGATGCTGATCTTGCAGCCACTTGTGTCTGCACCTCACATGTAGGCTATCAGCCTA  
TATAAAGTTTTGCTATTCATTGAAAGCAGTAGTGACTGATTTGTATATA

>MinSyn\_1927|Strength:0.021595007

GCGTGTGTTTTAGTGAGGCAAATATTTCTTGCTCACTGCTAGGAGGACCGATGCTGATGTGGGAGC  
CACCACCACTATGCCCAATTAGGTTGTCTGCAGCAAGTGGATATGTAGGCTATCAGCTTAGCATGGTG  
GAGCACGACATAGGCAGTGGTCCCTCCACTCGCGGTATGACGTAAGCCATGACGTCTATATCAGCTTA  
AAAAATGTCAAAGATACATGTAGGCTATCAGCTTTCAGAAGATCAAAGGGCTAGTCTGCACCTCACAT  
GTAGTGAAGCATCTCCGACCGACTATATAAAGTTTTGCTATTCATTGAAAGCAGTAGTGACTGATTT  
GTATATA

>MinSyn\_1204|Strength:0.021651386

GCGTGTGTTTTAGTGAGGTGAAGATAAGATAATAATGTTGAAGATAAGATGATCTTGCTGAAGCATC  
TTCCGCACCTCACATGTAGGCTATCAGCTTAGCCAGCCACTTGTGTACTGCTAGGAGGACCGATGCTG  
ATCAACCACGTCTACAACCCTGACGTAAGGGATGACGCACATCTGCACCTCACATGTAGAAGATTGAT  
GAAAAGTCAAAAACAAAATCAATTATGTCTGCACCTCAATTGCGATAAAGGAAAGGTGCTAGGAGGA  
GGTGGCTCCTACCTCTATATAAAGTTTTGCTATTCATTGAAAGCAGTAGTGACTGATTTGTATATA

>MinSyn\_1344|Strength:0.02172796

GCGTGTGTTTTAGTGAGGTGGTGGAGCACGACACTTAGCAAGACCTCTACAACTGACGTAAGGGAT  
GACGCACAGTTATCGAAAGGACAGTACAATTAGTTTTCAACAAATAAGATTGATGAAAAGTCAAAAAC  
AAAAATCAATTATGGTAGGTCATCAGAAGATCAAAGGGCTATAAGGTGGCTCCTACCTGCACCTCACA  
TGTAGGCTATCAGCTTACTATATAAAGTTTTGCTATTCATTGAAAGCAGTAGTGACTGATTTGTATAT  
A

>MinSyn\_1115|Strength:0.02175701

GCGTGTGTTTTAGTGAGGAACCATTATTGCGGCCTTGAACCACGTCTACAATAGGTATGACGTAAGC  
CATGACGTCTACGATGCTGATCTTGCCTGCCTTAGGTGGCTCCTACCAATTAGGTTGTCTGCACCTCA  
CATATCCTTACCCTATGGGTAAGATTTTAGGTTGTCTGCACCTCACTTATGACCCCGCCGATGACG  
CGGGAAGACCTCTACAACTATATAAAGTTTTGCTATTCATTGAAAGCAGTAGTGACTGATTTGTATA

TA

>MinSyn\_1576|Strength:0.022107473

GCGTGTCTGTTTTAGTGAGGCTCTCTGCCGACAGTGGTCCCAAAGGTAGGTCTCCATCAACAAATAAT  
CCAAGTAAGGTAGGCTATCAGCTTAGCATGACGTAAGCCATGACGTCTATCGCGGTAGGTCACATTGC  
GATAAAGGAAAGGCACTGCTAGAGCAAGTGGATGTTGTCTGCACCTCACATGTAGGCTATCGCACACC  
AGCATGTGTTGATCACCAGCTATCAGCTTAGCAAGACCTCTATATAAGGTTTTGCTATTCATTGAAAG  
CAGTAGTACTGATTTGTATATA

>MinSyn\_1347|Strength:0.022211928

GCGTGTCTGTTTTAGTGAGGCTGACGTAAGGGATGACGCACAGGGCTCACTGCGTGGGAGCCACCAGAT  
GCTGATCTTAAAAATGTCAAAGATATACTTGTGTACAGTCACTATCAGCTTGTCTGCACCTCACATGT  
AGGCTACAGCCACTTGTGTGCACAGCAAGTGGATGAACCATTATTGCGCGGTAGGTCACCTATATAAG  
GTTTTGCTATTCATTGAAAGCAGTAGTACTGATTTGTATATA

>MinSyn\_1383|Strength:0.022337491

GCGTGTCTGTTTTAGTGAGGGCTTTGTCAAAGCTAAAAAGATGATGCCGCGTAAACCACGTCTACA  
AGAATCGAAAGGACAGTAGTGGTGGAGCACGACACACCTCACATGTAGGCTATCAGCTTAGCAACTGA  
CGTAAGGGATGACGCACAGTACTTGTGTACAGATTGCGATAAAGGAAAGGCACTATGCCCAATTAGGT  
TGTCTGCACCTGCACACCAGCATGTGTTGATCACCAGCTAGGACCGATGCTGATCTTGCCCTATATA  
AGGTTTTGCTATTCATTGAAAGCAGTAGTACTGATTTGTATATA

>MinSyn\_1148|Strength:0.022351469

GCGTGTCTGTTTTAGTGAGGATGACGTAAGCCATGACGTCTACACCTCACATGTAGGCTATCAGCTTAG  
ATTGCGATAAAGGAAAGGCCGATGCTGATCTTGCCCTGCATCGAAAGGACAGTAGCACCTCACATGTAG  
GCTATCAAATTCGGGAAACCTCCTCGAGGACCGATGCTGGTGGAGCACGACAGTACAGCTATATAAG  
GTTTTGCTATTCATTGAAAGCAGTAGTACTGATTTGTATATA

>MinSyn\_1233|Strength:0.022693784

GCGTGTCTGTTTTAGTGAGGATGACGTAAGCCATGACGTCTAAGCAAGACCTCTACAAAACCTGGAAAA  
GAAGAGGTCTGCAATCGAAAGGACAGTATCGCGAGGTGGCTCCTACGGTAGGTGAAGATAAGATAATA  
ATGTTGAAGATAAGAGACCTCTACAAAACCTGATTGCGATAAAGGAAAGGGCACCTCACACTATATAAG  
GTTTTGCTATTCATTGAAAGCAGTAGTACTGATTTGTATATA

>MinSyn\_1430|Strength:0.022780331

GCGTGTCTGTTTTAGTGAGGATGACGTAAGCCATGACGTCTACGCGGTAGGTGGGAGCCACCAAGCAAG  
AGGAAAAAGAAGAGGTTGGTACTTGTGTACAGGGCTAGCAAGTGGATGAGGTGGCTCCTACACAAAAC  
TGGTACTTGTGTACAGGTGAAGATAAGATAATAATGTTGAAGATAAGACCAATTAGCTATATAAGGT  
TTTGCTATTCATTGAAAGCAGTAGTACTGATTTGTATATA

>MinSyn\_1900|Strength:0.023125814

GCGTGTCTGTTTTAGTGAGGAACCATTATTGCGTGTACAGGGCTCACTGCTAGGAGGACCTCACTATCA  
GCACCTCACATGTAGGCTATCAGCTTAGATCGAAAGGACAGTAACTGACGTAAGGGATGACGCACAGT  
TGTCTGCAAATATTTCTTGTATTAGGTTGTCTGCACCTCATCAGAAGATCAAAGGGCTAACCTCACAT  
GTAGGCTATCAGCTTAGCAAATTCGGGAAACCTCCTCGTGTCTGCTATATAAGGTTTTGCTATTCAT  
TGAAAGCAGTAGTACTGATTTGTATATA

>MinSyn\_1124|Strength:0.023167549

GCGTGTCTGTTTTAGTGAGGATGAGCTAAGCACATACGTCAGTGTGTACAGGGCTCACTGCTAGCAAAT  
ATTTCTTGTTCGCGGTATGACGTAAGCCATGACGTCTATAGGATTATGACCCCCGCCGATGACGCGGG  
AACTGCTAGGAGGACCGATGCTGATCACTATCAGCGCGGTAGGTCACTGGTGGAGCACGACATTGCCT  
GATCGAAAGGACAGTAGACCTCTACAAAACCTGGTACTTGTGTACAGGGAAAAAGAAGAGGTGTACAGG  
GCTCACTGCTATCCTTACCGCTATGGGTAAGATTTAGGAGGACCGCTATATAAGGTTTTGCTATTCAT  
TGAAAGCAGTAGTACTGATTTGTATATA

>MinSyn\_1613|Strength:0.02336254

GCGTGTCTGTTTTAGTGAGGATGAGCTAAGCACATACGTCAGGTGTACAGGGCTCACTGCTAGGAACCA  
CGTCTACAAAGCTTAGCAAGACCTCTACAATTCGGGAAACCTCCTCGCCGATGGCTTTGTCAAAGC  
TAAAAAGATGATGCACTGGTACTTGTGTACAGGGCTCACCTATATAAGGTTTTGCTATTCATTGAAA  
GCAGTAGTACTGATTTGTATATA

>MinSyn\_1808|Strength:0.023566348

GCGTGTCTGTTTTAGTGAGGATGACGTAAGCCATGACGTCTAACTATGCCCAATTAGGGGAAAAAGAAG  
AGGTCTCACTGTCCATCAACAAATAATCCAAGTAAGCATGTAGATCGAAAGGACAGTATGGTACTTGT



GTACAGGGCTCACTGCTAGTCACTATCAGCGACCACTATGCCCAATTAGGTTGCTATATAAGGTTTTG  
CTATTCATTGAAAGCAGTAGTGACTGATTTGTATATA

>MinSyn\_1979|Strength:0.023684046

GCGTGTTCGTTTTAGTGAGGTGGTGGAGCACGACATCTACAAAATGACGTAAGCCATGACGTCTACAC  
GACCACTACTGACGTAAGGGATGACGCACAGACCACTATGCAAGATTGATGAAAAGTCAAAAACAAAA  
ATCAATTATGGACCGATGCTGATCTTGCCAGTGGTCCCTCCACCTGCACCTCACATGTAGGAAAAATG  
TCAAAGATACCAATTAGGTTGTCTGCACCTCACATGTAGAGGTGGCTCCTACCCAATCTATATAAGGT  
TTTGCTATTCATTGAAAGCAGTAGTGACTGATTTGTATATA

>MinSyn\_1181|Strength:0.023913541

GCGTGTTCGTTTTAGTGAGGCAAATATTTCTTGTAAGTGGTACTTGTGTACAGGGTGAAGATAAGATAA  
TAATGTTGAAGATAAGACAGCTTAGCACTGACGTAAGGGATGACGCACACACGACCACTATGCCCAAT  
CAGAAGATCAAAGGGCTAGTTGTCTGCACATTGCGATAAAGGAAAGGCTCACATGTAGGCTTGGTGG  
GCACGACATAGCAATCGAAAGGACAGTAGCTCCTATATAAGGTTTTGCTATTCATTGAAAGCAGTAGT  
GACTGATTTGTATATA

>MinSyn\_1998|Strength:0.024347373

GCGTGTTCGTTTTAGTGAGGAATTTTCGGGAAACCTCCTCGACCTCACATGTAGGCTATCAGCTTAGCAA  
ACCATTATTGCGAGGGCTCACTGCTAGGAGGACCGATGCTGATCGAAAGGACAGTATGATCTGAAGCA  
TCTTCCAGACCTCTACAAAAGTGGTACTTGTGTGCACACCAGCATGTGTTGATCACCAGCTGCTAGGA  
GGACCGCTGACGTAAGGGATGACGCACATAGGAGGACCGATGTGAAGATAAGATAATAATGTTGAAGA  
TAAGAACTATGCCCAATTAGGTTGTCTGCACATATAAGGTTTTGCTATTCATTGAAAGCAGTAGTGA  
CTGATTTGTATATA

>MinSyn\_1482|Strength:0.02464178

GCGTGTTCGTTTTAGTGAGGGTGGGAGCCACCACCTTATGACCCCGCCGATGACGCGGGATGATTGAA  
GATAAGATAATAATGTTGAAGATAAGACTGCTAGGTGAAGCATCTTCCAGACCTCTACAAAAGTGTCC  
ATCAACAAATAATCCAAGTAAGCAAAAAGTGGTACTTGTGTACAGGGTTTTCAACAAGGCTCATGACGT  
AAGCCATGACGTCTAAGGGCTCAGTGGTCCCTCCACTTAGCAAGACCTCTACAAAAGTGCACACCAGC  
ATGTGTTGATCACCAGCTTACCTATATAAGGTTTTGCTATTCATTGAAAGCAGTAGTGACTGATTTG  
TATATA

>MinSyn\_1600|Strength:0.024891757

GCGTGTTCGTTTTAGTGAGGCAAATATTTCTTGTTGGGCATCCTTACCGCTATGGGTAAGATTCACTATG  
CCCAATTAGGTTGAAGATAAGATAATAATGTTGAAGATAAGACACTGCTAGGAGGACCGATGCTGATC  
TTATGACGTAAGCCATGACGTCTAGTAACCATTATTGCGAGCAATCGAAAGGACAGTATTGCCTGCCT  
TGATGAAAGATTGATGAAAAGTCAAAAACAAAATCAATTATGCTATCAGCTTCTATATAAGGTTTTG  
CTATTCATTGAAAGCAGTAGTGACTGATTTGTATATA

>MinSyn\_1342|Strength:0.024902135

GCGTGTTCGTTTTAGTGAGGCAGTGGTCCCTCCACACGACCACGTGGGAGCCACCACCAATTAGGTTG  
TCTGCACCTCACATTCATCTACGCTCTACAAAAGTGGTACTTGTCTGACGTAAGGGATGACGCACAG  
GTCACGACCACAAGATTGATGAAAAGTCAAAAACAAAATCAATTATCAGGGCTCACTGCTAGGAGGA  
CCGATGATCGAAAGGACAGTAACCAATATTTCTTGCTATATAAGGTTTTGCTATTCATTGAAAGC  
AGTAGTGACTGATTTGTATATA

>MinSyn\_1595|Strength:0.024922556

GCGTGTTCGTTTTAGTGAGGAACCACGTCTACAAAATTAGGTTGTCTGCACCTCCAGTGGTCCCTCCAC  
ACCACTATGCCCAATTATGACGTAAGCCATGACGTCTAGGTAGGTACGACCACTATGCCCAATTAGG  
GCACACCAGCATGTGTTGATCACCAGCTATAAGATTGATGAAAAGTCAAAAACAAAATCAATTATAT  
CAGCATCGAAAGGACAGTAGGCTATATAAGGTTTTGCTATTCATTGAAAGCAGTAGTGACTGATTTGT  
ATATA

>MinSyn\_1231|Strength:0.025061356

GCGTGTTCGTTTTAGTGAGGAATTTTCGGGAAACCTCCTCGTAGGTCACGATCACTATCAGCCCCTATG  
CCCAATTAGGTTGTCTGCACCTCCATCAACAAATAATCCAAGTAAGTCTGCACCTCAACCACGTCTAC  
AACCCTATTTTCAACAAGTCAAGACCTCTACAAAATCGAAAGGACAGTAGCTTAGCAAGACCTC  
ATGACGTAAGCCATGACGTCTAGCAAATATTTCTTGCTAGGAGGACCGATGCTGATCTTGTCTCTC  
TGCCGACAGTGGTCCCAAAGGAGCTATATAAGGTTTTGCTATTCATTGAAAGCAGTAGTGACTGATTT  
GTATATA

>MinSyn\_1908|Strength:0.025090813

GCGTGTGCGTTTTAGTGAGGCAGTGGTCCCTCCACAACTGGTACTTGTGTACAGGGATGACGTAAGCC  
ATGACGTCTAACATGTAGGCTATCAAGCAAGTGGATTAGGTCACGACCACTATGTCCATCAACAAATA  
ATCCAAGTAAGACCGATGCTGATCTTGCAAAAATGTCAAAGATAACCACTATGCCCAATTAGGTTGTC  
TCTATATAAGGTTTTGCTATTCATTGAAAGCAGTAGTGACTGATTTGTATATA

>MinSyn\_1684|Strength:0.025177688

GCGTGTGCGTTTTAGTGAGGAAGATTGATGAAAAGTCAAAAACAAAATCAATTATACTATGCCCAATT  
AGGTTGTCTGCACTCCATCAACAAATAATCCAAGTAAGCGGTAGGTCACGACCACTATGCCCAAAAAA  
ATGTCAAAGATAATCTTGCCTGCCTTGATGACTGACGTAAGGGATGACGCACATTGTGTACAGGGCTC  
ACTGCTAGTGAAGATAAGATAATAATGTTGAAGATAAGAGCTTAGCAAGACCTCTACAAAACCTGGTAC  
TATATAAGGTTTTGCTATTCATTGAAAGCAGTAGTGACTGATTTGTATATA

>MinSyn\_1958|Strength:0.025389954

GCGTGTGCGTTTTAGTGAGGTTATGACCCCGCCGATGACGCGGGAACTGGTACTTGTGTACAGGGCT  
CAGAAGATCAAAGGGCTATACAGGGCTCACTGATCGAAAGGACAGTAGTTGTCTGCACGTGGGAGCCA  
CCACTGGTACTTGTGTACAGGGCTCACTTCTCTCTGCCGACAGTGGTCCCAAAGCTCACTGCTAGGAG  
GACCGCTTTGTCAAAGCTAAAAAGATGATGCCAGCTTAGCAAGACCTCTAATTTCCGGGAAACCTCC  
TCGTCACTGCTAGGAGGATGAAGATAAGATAATAATGTTGAAGATAAGAGGCTCACTGCTAGGAATGA  
CGTAAGCCATGACGTCTAACAAAACCTGGTACTTGTGTACAGGGCTCACTATATAAGGTTTTGCTATTC  
ATTGAAAGCAGTAGTGACTGATTTGTATATA

>MinSyn\_1569|Strength:0.025869568

GCGTGTGCGTTTTAGTGAGGGCTTTGTCAAAGCTAAAAAGATGATGCCCTCACATCAGCCACTTGTG  
TTGCTGATCATGACGTAAGCCATGACGTCTACATGAGCTAAGCACATACGTCAGAGCAAGACCTCTAC  
AAAACCTGGATCCTTACCGCTATGGGTAAGATTCCGATGAATTTCCGGGAAACCTCCTCGGGCTATCAGC  
TTAAGGTGGCTCCTACACCTCACATGTAGGCTATCAGCTTAGAAAAATGTCAAAGATAACCAATTA  
TATAAGGTTTTGCTATTCATTGAAAGCAGTAGTGACTGATTTGTATATA

>MinSyn\_1817|Strength:0.026387978

GCGTGTGCGTTTTAGTGAGGTCCATCAACAAATAATCCAAGTAAGGCACCTCACATGTAGGCTAATGAC  
GTAAGCCATGACGTCTAGACCAGCCACTTGTGTCTGCCTTGATGATTTATGACCCCGCCGATGACGC  
GGGACGACCACTATGCTGAAGATAAGATAATAATGTTGAAGATAAGACCAATTAGGTTGTCTGCACCT  
CCTATATAAGGTTTTGCTATTCATTGAAAGCAGTAGTGACTGATTTGTATATA

>MinSyn\_1530|Strength:0.026525711

GCGTGTGCGTTTTAGTGAGGTCACTATCAGCCAGCTTAGCAAGACCAATTTCCGGGAAACCTCCTCGAGG  
AAAAAGAAGAGGTTCTGCACCTCTGACGTAAGGGATGACGCACACTGCACCTCACATGTAGGCTATCA  
TCCTTACCGCTATGGGTAAGATTTAGGTTGTCTGCACCTCACATTTTTCAACAATATGCCCAATTAGG  
TTGTCTGCACCTCACCTATATAAGGTTTTGCTATTCATTGAAAGCAGTAGTGACTGATTTGTATATA

>MinSyn\_1003|Strength:0.026710807

GCGTGTGCGTTTTAGTGAGGTCACTATCAGCGGTAGGTCACGACCACTGACGTAAGGGATGACGCACAC  
ATGTAGGCTATCAGCTTAGCAAGACCTCAGGTGGCTCCTACCTCCATCAACAAATAATCCAAGTAAGC  
CTTGATGTCAGAAGATCAAAGGGCTAGTGGTGGAGCACGACAATCTTGCCTGCCTTGACTATATAAGG  
TTTTGCTATTCATTGAAAGCAGTAGTGACTGATTTGTATATA

>MinSyn\_1964|Strength:0.026810648

GCGTGTGCGTTTTAGTGAGGTGAAGATAAGATAATAATGTTGAAGATAAGATCGCGGTAGGTCAAAAT  
GTCAAAGATAGGACCGATGCTGATCTTGTGAGAAGATCAAAGGGCTACCAATTAGGTTGTCTTCACTA  
TCAGCCTATGCCAATTAGGTTGTCTGCACGAAAAAGAAGAGGTAGACCTCTACAAAACCTGGTACTT  
GTGTACAGTGGGAGCCACCATCAGCTTAGCAAGACCTCTACAAAACCTGGTGGTGGAGCACGACAGCTA  
GGAGGACCGATGCTGATCTTGCCTTGAAGCATCTTCCCACTGCTAGGAGGACCGATGCTGATCTTGT  
GAGCTAAGCACATACGTCAGCCCTATATAAGGTTTTGCTATTCATTGAAAGCAGTAGTGACTGATTTG  
TATATA

>MinSyn\_1322|Strength:0.026849537

GCGTGTGCGTTTTAGTGAGGAAGATTGATGAAAAGTCAAAAACAAAATCAATTATGGTAGGTCACGAC  
CAGGTGGCTCCTACTGCACCTCACATGTAGGCTAATGACGTAAGCCATGACGTCTAGGTACTTGTGAT  
CGAAAGGACAGTACTACAAAACCTGGTACTTGTGTTGAAGATAAGATAATAATGTTGAAGATAAGACTC  
ACTGCTAGGAGGACCGATGCTCTATATAAGGTTTTGCTATTCATTGAAAGCAGTAGTGACTGATTTGT  
ATATA

>MinSyn\_1203|Strength:0.027049334

GCGTGTCTGTTTTAGTGAGGATCCTTACCGCTATGGGTAAGATTGACCTCTACAAAACCTGGTACTTTTC  
AACAAATGCCCAATTAGGTTGTCTGTGAGAAGATCAAAGGGCTAGCACCTCACATCAGTGGTCCCTCCA  
CTCACATGTAGGCTATCAGCTTAGCATGAAGATAAGATAATAATGTTGAAGATAAGACGATGCTGAAA  
TTTCGGGAAACCTCCTCGGGTCACGACCACTATGCCCAATTAAGCAAGTGGATGCCCAATTAGGTTGT  
CTGCAGCTTTGTCAAAAAGCTAAAAAAGATGATGCAGGGCTCACTGCTAGGAGATGACGTAAGCCATGA  
CGTCTACCTGCCTTGACTATATAAGGTTTTGCTATTATTGAAAGCAGTAGTGACTGATTTGTATATA  
>MinSyn\_1875|Strength:0.027232371

GCGTGTCTGTTTTAGTGAGGTTATGACCCCGCCGATGACGCGGGAGCCTGACGTAAGGGATGACGCAC  
ACTGCACCTCACATGTAGGCTTCCATCAACAAATAATCCAAGTAAGTAGGTCACGACCACTATGCCCA  
ATTAGGTTGGTGGAGCACGACACAGGGCTATTGCGATAAAGGAAAGGAGGACCGATCTATATAAGGTT  
TTGCTATTATTGAAAGCAGTAGTGACTGATTTGTATATA

>MinSyn\_1914|Strength:0.02765369

GCGTGTCTGTTTTAGTGAGGAATTTCCGGGAAACCTCCTCGCTCTACAAAACCTGGTACTTGTGTACAGGG  
TCTCTCTGCCGACAGTGGTCCCAAAACCTCTACAAAAGATTGATGAAAAGTCAAAAACAAAAATCAA  
TTATGCCCAATTAGTCCATCAACAAATAATCCAAGTAAGGATCTTGCCTGCCCTGACGTAAGGGATGA  
CGCACAGGAGGACAACCATTATTGCGTTAGCAAGACCTCTACAAATCAGAAGATCAAAGGGCTAGCCT  
CTATATAAGGTTTTGCTATTATTGAAAGCAGTAGTGACTGATTTGTATATA

>MinSyn\_1645|Strength:0.027797816

GCGTGTCTGTTTTAGTGAGGCTGACGTAAGGGATGACGCACACAGGTGGCTCCTACAGCTTAGCAAGAA  
AGATTGATGAAAAGTCAAAAACAAAAATCAATTATAAACTGGTACTTGTGTACAGGGCTCCAAATAT  
TTCTTGCAACCACGTCTACAACACCTCACATGTAGGCTATATAAGGTTTTGCTATTATTGAAAGC  
AGTAGTGACTGATTTGTATATA

>MinSyn\_1256|Strength:0.027996543

GCGTGTCTGTTTTAGTGAGGTCCATCAACAAATAATCCAAGTAAGCTAGGAGGACCGATGCTGATCTTG  
CCTATTGCGATAAAGGAAAGGCGATGCTGATCTTCAAGTGGTCCCTCCACGCCAGCAAGTGGATCCTC  
ACATGTAGGCTATCATGACGTAAGCCATGACGTCTATAGGAGGACCGATGCTGAAAGATTGATGAAAA  
GTCAAAAACAAAAATCAATTATAGGTACGACCACTATGCCCACTATATAAGGTTTTGCTATTATTG  
AAAGCAGTAGTGACTGATTTGTATATA

>MinSyn\_1885|Strength:0.028000408

GCGTGTCTGTTTTAGTGAGGATGACGTAAGCCATGACGTCTATTGCCTGCCGAAAAAGAAGAGGTCAC  
GACCACTATGCCCAATTAGTGGTGGAGCACGACACATGTAGGCTAAGATTGATGAAAAGTCAAAAACA  
AAAATCAATTATCTGCACCTCACATGTAGGCTATCAGCTATATAAGGTTTTGCTATTATTGAAAGCA  
GTAGTGACTGATTTGTATATA

>MinSyn\_1484|Strength:0.028185233

GCGTGTCTGTTTTAGTGAGGATCGAAAGGACAGTAAGCAAGACCTCTACAAAACCTGGAAGATTGATGAA  
AAGTCAAAAACAAAAATCAATTATTACAGGAACCACGTCTACAACCTCTACAAAACCTGGTACTTGTGTA  
CAGGGATCCTTACCGCTATGGGTAAGATTGTCTGCACCTCACATGTAGGCTATCAGCTTAACCATTAT  
TGCGGCACCTCACATGTATCACTATCAGCAGCAAGAATTTCCGGGAAACCTCCTCGTACAGGGCTCACT  
CTGACGTAAGGGATGACGCACAGACCACTATGCCCAATAGGTGGCTCCTACGGTTGTCTGCACCTCAC  
ATGCTATATAAGGTTTTGCTATTATTGAAAGCAGTAGTGACTGATTTGTATATA

>MinSyn\_1924|Strength:0.02819587

GCGTGTCTGTTTTAGTGAGGAGCAAGTGGATACAGGGCTCACTGCAAGATTGATGAAAAGTCAAAAACA  
AAAATCAATTATGACCGATGCTGATCTTGCCTGCGCACACCAGCATGTGTTGATCACCAGCTGTA  
GTGTACAGGGCTCACTGCTAGTCTCTCTGCCGACAGTGGTCCCAAAGTAGGTCACGACCATCACTATC  
AGCGTACTTTATGACCCCGCCGATGACGCGGGAACGACCACTATGCATTGCGATAAAGGAAAGGCTA  
CATGAGCTAAGCACATACGTACGTAGGTCACGACCACTATGCCCAACCATTATTGCGCTACAAAAC  
GGTACTCTATATAAGGTTTTGCTATTATTGAAAGCAGTAGTGACTGATTTGTATATA

>MinSyn\_1857|Strength:0.028347089

GCGTGTCTGTTTTAGTGAGGTTATGACCCCGCCGATGACGCGGGAAAGACCTCTACAAAACCTGGTACG  
CTTTGTCAAAAAGCTAAAAAAGATGATGCGCTGATCTTGCCTGGTGGAGCACGACACTGCAAGATTGA  
TGAAAAGTCAAAAACAAAAATCAATTATCCTCACATGTAGGCTATCAGCTCTCTCTGCCGACAGTGGT  
CCCAAACCTCACTGCTAGGAGGATCCTTACCGCTATGGGTAAGATTTGCCCAATTAGGTTGTCTTTTCA  
ACAAAATTAGGTTGTCTGCACCTCACCTGACGTAAGGGATGACGCACACAGCTTAGCAAGACCTCTAC  
ACTATATAAGGTTTTGCTATTATTGAAAGCAGTAGTGACTGATTTGTATATA

>MinSyn\_1598|Strength:0.028476233  
GCGTGTCTGTTTTAGTGAGGATTGCGATAAAGGAAAGGCTTGCATCCTTACCGCTATGGGTAAGATTTG  
CCCAATTAGGCTGACGTAAGGGATGACGCACAGCCTTTCCATCAACAAATAATCCAAGTAAGCGGTAG  
GTCACGATGAAGATAAGATAATAATGTTGAAGATAAGACTCACATGTAGGGAAAAAGAAGAGGTATTA  
GGCTATATAAGGTTTTGCTATTCATTGAAAGCAGTAGTGACTGATTTGTATATA

>MinSyn\_1040|Strength:0.028709452  
GCGTGTCTGTTTTAGTGAGGATCCTTACCGCTATGGGTAAGATTCACTATGCCCAATCTGACGTAAGGG  
ATGACGCACAACGACCACTATGCCCAACAGTGGTCCCTCCACATGCTGATCTTGCTGCCATGAGCTA  
AGCACATACGTCAGCGGTAGGTCACGACCACAAGATTGATGAAAAGTCAAAAACAAAATCAATTATT  
TAGCAAGACCTCTACAAAATGAAGATAAGATAATAATGTTGAAGATAAGAACAACAACTGGTAGCACAC  
CAGCATGTGTTGATCACCAGCTATGTAGGATTGCGATAAAGGAAAGGCCAATTAGGTTGTCTGCACC  
ATCGAAAGGACAGTAAGGTCACGACCACTATGCCCAATTAGGTCATATAAGGTTTTGCTATTCATTG  
AAAGCAGTAGTGACTGATTTGTATATA

>MinSyn\_1749|Strength:0.028765713  
GCGTGTCTGTTTTAGTGAGGAGGTGGCTCCTACGCAAGACCTCTACAAATTATGACCCCCGCCGATGAC  
GCGGGAAACTCTGACGTAAGGGATGACGCACACTTAATTTTCGGGAAACCTCCTCGTATCAGCCACTTG  
TGTCACTGATCGAAAGGACAGTAACTGGTAAGCAAGTGGATCACATGTAGGCTATCAGCTTAGCAAC  
TATATAAGGTTTTGCTATTCATTGAAAGCAGTAGTGACTGATTTGTATATA

>MinSyn\_1447|Strength:0.028801708  
GCGTGTCTGTTTTAGTGAGGATCGAAAGGACAGTATACAAAGTGGGAGCCACCACCCAGCTTTGTCAA  
AGCTAAAAAAGATGATGCGGACCGATGCTGATCTTGCTGCCTTGGCACACCAGCATGTGTTGATCAC  
CAGCTCTACAATGAAGCATCTTCCGATCTTGCTGCCTTGATGTTATGACCCCCGCCGATGACGCGGG  
ATTAGTTGTCTGCTCAGAAGATCAAAGGGCTACTGATCTAAGATTGATGAAAAGTCAAAAACAAAA  
TCAATTATCACCTCACATGTAGGCTATATGACGTAAGCCATGACGTCTACTGATCTTGCTGCCTTCT  
ATATAAGGTTTTGCTATTCATTGAAAGCAGTAGTGACTGATTTGTATATA

>MinSyn\_1129|Strength:0.028880261  
GCGTGTCTGTTTTAGTGAGGAGGTGGCTCCTACCTTGCTGCCTTGAATTTTCGGGAAACCTCCTCGCG  
ACCACTATGCCCAATTAGTTTTGAAGATAAGATAATAATGTTGAAGATAAGATTCCATCAACAAATA  
TCCAAGTAAGCCTCTACAAAAGTGGTACTTGTGCTTTGTCAAAGCTAAAAAAGATGATGCGATTGCG  
ATAAAGGAAAGGACTGGTTCTCTGCGGACAGTGGTCCCAAAAGTGGTACTTGTGTACAGGGCTCA  
CTATCAGCCTTAGCAAGACCTCTACAAAAGTGGTACATGACGTAAGCCATGACGTCTACCTCCTATAT  
AAGTTTTGCTATTCATTGAAAGCAGTAGTGACTGATTTGTATATA

>MinSyn\_1821|Strength:0.028958314  
GCGTGTCTGTTTTAGTGAGGAATTTTCGGGAAACCTCCTCGTGACCTCTGGTGGAGCACGACAGGACGC  
TTTTGTCAAAGCTAAAAAAGATGATGCCAAAAGTGGTACTTGTGTACAGGGAAAAATGTCAAAGATA  
TCAGCTTAGCATCCATCAACAAATAATCCAAGTAAGGCTAGGAGGACCGATGCAGTGGTCCCTCCACG  
CTAGGAGGACCGATGCTGATCAACCATTATTGCGCCAATTAGGTTGTCTGACGTAAGGGATGACGCA  
CAGGCTCACTGCTAGGAGGACCGATGCTGATCCAGCCACTTGTGTTGATCTTGCTGCCTATATAAG  
GTTTTGCTATTCATTGAAAGCAGTAGTGACTGATTTGTATATA

>MinSyn\_1745|Strength:0.028974012  
GCGTGTCTGTTTTAGTGAGGATCCTTACCGCTATGGGTAAGATTCTCACATGTAGGCTATCAGCTTAGG  
GAAAAAGAAGAGGTCGGTAGGTCACGACCAAGATTGATGAAAAGTCAAAAACAAAATCAATTATTAT  
GAGCAAGTGGATTAGGTTGTCACTATCAGCTACTTGTGTACAGGGCTCACTGCTATCAGAAGATCAA  
GGGCTAAGGACCGATGCTGAGCTTTGTCAAAGCTAAAAAAGATGATGCCATGTAGGCTATCAGCTTA  
GCAAGACATGACGTAAGCCATGACGTCTATTGTCTTGAAGCATCTTCCAGGAGGACCGCTATATAAG  
TTTTGCTATTCATTGAAAGCAGTAGTGACTGATTTGTATATA

>MinSyn\_1949|Strength:0.029094295  
GCGTGTCTGTTTTAGTGAGGTCTCTGCGGACAGTGGTCCCAACTGCTAGGTCAGAAGATCAAAGGG  
CTACCAGTGGTCCCTCCACCTGGGAAAAAGAAGAGGTAATGCCCAATTAGGTTGTCTGCACCTATG  
ACGTAAGCCATGACGTCTAACCACAACCACGTCTACAAGTGTACAGGGAAAGATTGATGAAAAGTCAA  
AACAAAATCAATTATCTTGCTGCCTTGACTATATAAGGTTTTGCTATTCATTGAAAGCAGTAGTGA  
CTGATTTGTATATA

>MinSyn\_1625|Strength:0.029106419  
GCGTGTCTGTTTTAGTGAGGAGCAAGTGGATCACGACCACTATGCCCAATTAGCAGTGGTCCCTCCACG

TACTTGTGTACAGATCCTTACCGCTATGGGTAAGATTTGTGTACAGGGCTCACTGCTAGGTTTTCAAC  
AAATCAGCTTAGCAAGACCTCTTCCATCAACAAATAATCCAAGTAAGAGGTCACGACCACTGAAGATA  
AGATAATAATGTTGAAGATAAGAGGAGGACCGATGCTAACCACGTCTACAATGTCTGCACCATGACGT  
AAGCCATGACGTCTATTAGCAAGACCTCTACAAAAAATTTGGGAAACCTCCTCGACTGCTCTATATA  
AGGTTTTGCTATTCATTGAAAGCAGTAGTGACTGATTTGTATATA

>MinSyn\_1669|Strength:0.02923485

GCGTGTGTTTTAGTGAGGAGTGGTCCCTCCACTTAGGTTGTCTGCACCTCACATCCTTACCGCTAT  
GGGTAAGATTTCACTGCAAAAATGTCAAAGATAAACTGGTACTTAATTTGGGAAACCTCCTCGTCTG  
CACCTCACATGTACAAATATTTCTTGTCTATGTGGGAGCCACCACCTATGCCAATTAGGTTGTCT  
AAGATTGATGAAAAGTCAAAAACAAAATCAATTATTGCTAGGAGGACCGGAAAAAGAAGAGGTGGTT  
GTCTGCACCTCCTGACGTAAGGGATGACGCACATCACTGCTAGGAGGACCGATGCTGACTATATAAGG  
TTTTGCTATTCATTGAAAGCAGTAGTGACTGATTTGTATATA

>MinSyn\_1076|Strength:0.02926333

GCGTGTGTTTTAGTGAGGATCGAAAGGACGTAAGGAGGACCGATGAAGATTGATGAAAAGTCAA  
AAACAAAATCAATTATTCACATGTAGGCTATCAGCTTAGCAAGACTTTTCAACAATATCCATCAACA  
ATAATCCAAGTAAGCTCACATGTACTGACGTAAGGGATGACGCACAGATGCTGATCTTGGGAAAAAG  
AAGAGGTCAAACCATTATTGCGGATCTTGCCTGCCTTGATGATCTATATAAGGTTTTGCTATTCATT  
GAAAGCAGTAGTGACTGATTTGTATATA

>MinSyn\_1524|Strength:0.029306882

GCGTGTGTTTTAGTGAGGAGTGGTCCCTCCACCTTGCTCAGAAGATCAAAGGGCTAGGCTATCAGC  
TTAGCAAGACCTTGAAGCATCTTCCGGTACTTGTGTACAGGGCTCACTGCATTGCGATAAAGGAAAGG  
ATGCCAATAGGTGGCTCCTACGTAGGTCACGACCACTAATCCTTACCGCTATGGGTAAGATTTTGCC  
TGCAAGATTGATGAAAAGTCAAAAACAAAATCAATTATAGACCTCTACAAATCGAAAGGACAGTAGT  
CTGCACCTCACATGCTGACGTAAGGGATGACGCACAGTCACGACCACTATGCCAATTCTATATAAGG  
TTTTGCTATTCATTGAAAGCAGTAGTGACTGATTTGTATATA

>MinSyn\_1290|Strength:0.029376935

GCGTGTGTTTTAGTGAGGATTGCGATAAAGGAAAGGACTGCTAGGTGGCTCCTACATCTGACGTAAG  
GGATGACGCACATGCTAGGAGGACCGATGCAGCCACTTGTGTACGACCACTATGCCAATTAGGTTGT  
CAACCACGTCTACAACACTGCTAGGAGGACCGATGCTGATCTTTTTCAACAATCTATATAAGGTTTTG  
CTATTCATTGAAAGCAGTAGTGACTGATTTGTATATA

>MinSyn\_1071|Strength:0.029398465

GCGTGTGTTTTAGTGAGGTGAAGCATCTTCCCATGTAGTCTCTCTGCCGACAGTGGTCCCAAATACA  
GGGCTCACTGAATTTGGGAAACCTCCTCGAGGCTTCCATCAACAAATAATCCAAGTAAGTGCACCTC  
ACATCTGACGTAAGGGATGACGCACAAGGACCGATGCTGATCTTGCCTGCCAAAATGTCAAAGATAA  
TCAGAAGATCAAAGGGCTACAATTAGGTTGCCTATATAAGGTTTTGCTATTCATTGAAAGCAGTAGT  
GACTGATTTGTATATA

>MinSyn\_1078|Strength:0.029419088

GCGTGTGTTTTAGTGAGGGCTTTGTCAAAGCTAAAAAGATGATGCCTCACTGCTAGGAGGACCAT  
GACGTAAGCCATGACGTCTATGTGTACAGGGCTCACTGCTAGGAATCGAAAGGACAGTACATTATGAC  
CCCCGCCGATGACGCGGAAAAACCAAATATTTCTTGTGCTAGGAGGACCGATGCTGCTATATAAGG  
TTTTGCTATTCATTGAAAGCAGTAGTGACTGATTTGTATATA

>MinSyn\_1945|Strength:0.029592706

GCGTGTGTTTTAGTGAGGCTGACGTAAGGGATGACGCACAAGACCTCTACAAAACCTGGTACTTGTGT  
ACATCCATCAACAAATAATCCAAGTAAGAGACCTCTACAAAACCTGGTACTTTCACTATCAGCTGTGAA  
GATAAGATAATAATGTTGAAGATAAGACTGCCCTATATAAGGTTTTGCTATTCATTGAAAGCAGTAGT  
GACTGATTTGTATATA

>MinSyn\_1202|Strength:0.029626197

GCGTGTGTTTTAGTGAGGAACACGTCTACAACGACCACTATGCGCACACCAGCATGTGTTGATCAC  
CAGCTCGGTAGATTGCGATAAAGGAAAGGCATTTTCAACAACCTGCTAGGAGGACCGATGCTGATCTTG  
CCTAGGTGGCTCCTACGTCTGCACCTCACATGTAGGCTTGAAGATAAGATAATAATGTTGAAGATAAG  
ACAGGGCTCACTGCTTATGACCCCGCGGATGACGCGGGAGTAGGTCACGATGAGCTAAGCACATACG  
TCAGCTGCTAGGAGGACCGATCCTTACCGCTATGGGTAAGATTGCAAGACCTCTACTATATAAGGTTT  
TGCTATTCATTGAAAGCAGTAGTGACTGATTTGTATATA

>MinSyn\_1419|Strength:0.029656738

GCGTGTGTTTTAGTGAGGAAGATTGATGAAAAGTCAAAAACAAAATCAATTATTGCACCTCACATG  
TAGGCTATCAGCTTAATCGAAAGGACAGTAGCTAATCCTTACCGCTATGGGTAAGATTGACCGATGCT  
GATCTTCCATCAACAAATAATCCAAGTAAGTCTGCACCTCACATGTAGGCTATCAGCTTTTTCAACAA  
GTCACGACCACTATGTGGGAGCCACCACTATCAGCTTAGCAAGACCTCTACAAATATTTCTTGATCA  
GATGACGTAAGCCATGACGTCTATAGGCTATCAGCTTAGCAAGACCTCTACCTATATAAGGTTTTGCT  
ATTCATTGAAAGCAGTAGTGACTGATTTGTATATA

>MinSyn\_1358|Strength:0.029808951

GCGTGTGTTTTAGTGAGGGCACACCAGCATGTGTTGATCACCAGCTATGCTGATCTTGCCTGCCAG  
CCACTTGTGTAGGTTGTCTGCACCTCACATCTGACGTAAGGGATGACGCACAAGGCTATCAGCTTAGC  
ATCCTTACCGCTATGGGTAAGATTCTTAGCAAGACCTCTACAAAACCTGGTAACCACGTCTACAAGATG  
CTGATCCTATATAAGGTTTTGCTATTATTGAAAGCAGTAGTGACTGATTTGTATATA

>MinSyn\_1948|Strength:0.029948342

GCGTGTGTTTTAGTGAGGTCCATCAACAAATAATCCAAGTAAGGTCTCAGCCACTTGTGTACAAAAC  
TGGTACTTGTGTACAGGGCTCAAAGATTGATGAAAAGTCAAAAACAAAATCAATTATCTCACATGTA  
GGCTGGAAAAAGAAGAGGTATCAGCTATCCTTACCGCTATGGGTAAGATTTAGCTTTGTCAAAGCTA  
AAAAAGATGATGCGGCTTCTCTCTGCCGACAGTGGTCCCAAAGTCTGACGTAAGGGATGACGCACATA  
CTTGTGTACATTATGACCCCCGCCGATGACGCGGGATGCCCAATTAGGTTGCTATATAAGGTTTTGCT  
ATTCATTGAAAGCAGTAGTGACTGATTTGTATATA

>MinSyn\_1282|Strength:0.029986531

GCGTGTGTTTTAGTGAGGTCTCTCTGCCGACAGTGGTCCCAAATCACTGCTAGGAGGACCGATGCTC  
AGCCACTTGTGTCCCAATTAGGTTGTCTGCACCTCAGCTTTGTCAAAGCTAAAAAGATGATGCACT  
GCTAGGATCACTATCAGCCTATGCCCAATTAGGTTGTCTGAGGTGGCTCCTACGCACCTCACATCCTT  
ACCGCTATGGGTAAGATTTAGCTTAGCAATCGAAAGGACAGTACACTATGCCCAATTAGGTGGAAAA  
AGAAGAGGTTGCGATGACGTAAGCCATGACGTCTAAGGACCGATGCTCTATATAAGGTTTTGCTATTC  
ATTGAAAGCAGTAGTGACTGATTTGTATATA

>MinSyn\_1928|Strength:0.029986847

GCGTGTGTTTTAGTGAGGATCCTTACCGCTATGGGTAAGATTA AAAACTGGTACTTGTGTACAGGGCT  
CACTGGCTTTGTCAAAGCTAAAAAGATGATGCGTAGGCTATCAGCTTAGCAAGAATTGCGATAAAG  
GAAAGGGTAGGTACGACTCAGAAGATCAAAGGGCTACCCAATTAGGTTGTCTGCACCTCACATTGG  
TGGAGCACGACTCCAAATATTTCTTGTGTAGGTACGACCACTATGCCCAATTCTGACGTAAGGGA  
TGACGCACAGGTACAGTGGTCCCTCCACTCACATGTAGGCTATCACTATATAAGGTTTTGCTATTCA  
TTGAAAGCAGTAGTGACTGATTTGTATATA

>MinSyn\_1177|Strength:0.030180156

GCGTGTGTTTTAGTGAGGATGACGTAAGCCATGACGTCTACCTCTACAAAACCTGGTACTTGTGTACA  
GATCCTTACCGCTATGGGTAAGATTCACGACCACTATGCCCAATTAGGTTGTCTGAACCATTATTGCG  
TAGATCGAAAGGACAGTAACATGTAGGCTCTATATAAGGTTTTGCTATTATTGAAAGCAGTAGTGAC  
TGATTTGTATATA

>MinSyn\_1962|Strength:0.030383533

GCGTGTGTTTTAGTGAGGTCTCTCTGCCGACAGTGGTCCCAAACACCTCACATGTAGGCTATCATCA  
GAAGATCAAAGGGCTAAAACCTGGTACTTGTGTACAGGGCTTCACTATCAGCGCAAGACCTCTACAAA  
CTGGTACTTGTGAGCAAGTGGATCTGCTAGGAGGACCGATGCTGATTATGACCCCCGCCGATGACGCG  
GGAAGTCTAGGAATGAGCTAAGCACATACGTGACCTCACATGTAGGCTATCAGCTTAGCAAGACAA  
ATATTTCTTGTAGGTTGTCTGCACCTCACATGTAGGCTCTATATAAGGTTTTGCTATTATTGAAAG  
CAGTAGTGACTGATTTGTATATA

>MinSyn\_1852|Strength:0.030410964

GCGTGTGTTTTAGTGAGGATCGAAAGGACAGTAGGCTCACTGCTAGGAGGACCGATGCTTGAAGATA  
AGATAATAATGTTGAAGATAAGAGGTAGGTCACGACCACTATATGACGTAAGCCATGACGTCTATAAA  
AAATGTCAAAGATATAATCCTTACCGCTATGGGTAAGATTGTACGACCACTATGCCCAATTAGGTTT  
TTCAACAAAACCTATATAAGGTTTTGCTATTATTGAAAGCAGTAGTGACTGATTTGTATATA

>MinSyn\_1352|Strength:0.030538666

GCGTGTGTTTTAGTGAGGTGAAGCATCTTCTAGGAGGACCGATGAAGATTGATGAAAAGTCAAAA  
CAAAAATCAATTATCTCACATGTAGGCTATCAGCTTAGCAACAGCCACTTGTGTATCAGCTTAGCAAG  
ACCTCTACAAAACCTGAACCACGTCTACAATAGCAAGACCTCTACAAAACCTGGTATCCATCAACAAATA  
ATCCAAGTAAGCTGGTTCAGAAGATCAAAGGGCTAGCTTAGCAAGACCTCTACAAAACCTGGTACTGTG

GGAGCCACCACTATGACGTAAGCCATGACGTCTATGGTACTCTATATAAGGTTTTGCTATTCATTGAA  
AGCAGTAGTGACTGATTTGTATATA

>MinSyn\_1822|Strength:0.030571413

GCGTGTTCGTTTTAGTGAGGTCTCTCTGCCGACAGTGGTCCCAAATGCTGATCTTGCCTGCCTTGATGA  
TGCACACCAGCATGTGTTGATCACCAGCTGCAAGAATTGCGATAAAGGAAAGGAGGTTGTCTGCACCT  
CACATGATCCTTACCGCTATGGGTAAGATTCTGCTAGGAGGACGGAAAAAGAAGAGGTCACCTCAATG  
AGCTAAGCACATAACGTCAGACAAAACCTGGTACTTGTGTACAGGGCCAAATATTTCTTGTACATGATC  
GAAAGGACAGTAGCAAGACCTCTACAAAACCTGGTACTTGTGCTATATAAGGTTTTGCTATTCATTGAA  
AGCAGTAGTGACTGATTTGTATATA

>MinSyn\_1768|Strength:0.030662246

GCGTGTTCGTTTTAGTGAGGTGGTGGAGCACGACAGCTAGGAGGACCGATGGCTTTGTCAAAGCTAAA  
AAAGATGATGCCTCACTGCTAGGAGGACCGATGCTGACTGACGTAAGGGATGACGCACACGCGGTAGG  
TCACGACGCACACCAGCATGTGTTGATCACCAGCTTGAGGTGGCTCCTACCCTCACATGTAGGCTATC  
AGCTTACTATATAAGGTTTTGCTATTCATTGAAAGCAGTAGTGACTGATTTGTATATA

>MinSyn\_1756|Strength:0.030829521

GCGTGTTCGTTTTAGTGAGGTGAAGATAAGATAATAATGTTGAAGATAAGAACAGGGCTCACTGCTAGG  
AATTTTCGGGAAACCTCCTCGCCACTATGCCAGGTGGCTCCTACGCTATCAGCTTAGCAAGACCTCTTC  
TCTCTGCCGACAGTGGTCCCAAACCTGCCTTGATCCTTACCGCTATGGGTAAGATTGTGTACATGAAG  
CATCTTCTCACATGTAGGCTATCAGCTTAGCAATGAGCTAAGCACATACGTCAGCCAATTAGGTTGT  
CTGCACCTCAGAAGATCAAAGGGCTAACAGGGCTCACTCTATATAAGGTTTTGCTATTCATTGAAAGC  
AGTAGTGACTGATTTGTATATA

>MinSyn\_1492|Strength:0.030842137

GCGTGTTCGTTTTAGTGAGGTGAAGCATCTTCTCACGACAATTTTCGGGAAACCTCCTCGAAAACCTGA  
ACCATTATTGCGTCTACAAAACCTGGTACTTGTGTACAGGTGGCTCCTACACCTCACATGTAGGCTATT  
TTTCAACAATATCAGCTTAGCAAGACCTCTACAAATGAGCTAAGCACATACGTCAGAGGACCGATTCT  
CTCTGCCGACAGTGGTCCCAAACAGGGCTTTGTCAAAGCTAAAAAAGATGATGCAGGCTATCAGCT  
TAGCAAGACCTCTACAAAAAATGTCAAAGATATCTCTATATAAGGTTTTGCTATTCATTGAAAGCAGT  
AGTGACTGATTTGTATATA

>MinSyn\_1980|Strength:0.030933655

GCGTGTTCGTTTTAGTGAGGAACACGCTCTACAAACCTCTACAAATGAAGATAAGATAATAATGTTGAA  
GATAAGAACATGTAGGCTATCAGCTTAGCAAGAATTGCGATAAAGGAAAGGCAAGACCTCTACAAAAC  
TGGTACTTGTGTAGGAAAAAGAAGAGGTACCTCACATGTAGGCTATCAGCTATCCTTACCGCTATGGG  
TAAGATTACCACTATGCCCAATTATGACGTAAGCCATGACGTCTATGGTATTATGACCCCCGCCGATG  
ACGCGGGATGTACAGGGCTCACTGCTAGGAGGACCGCTATATAAGGTTTTGCTATTCATTGAAAGCAG  
TAGTGACTGATTTGTATATA

>MinSyn\_1441|Strength:0.031032834

GCGTGTTCGTTTTAGTGAGGAACATTATTGCGTGTAGGCTATCAGCTTAGCAAGAGCACACCAGCATG  
TGTTGATCACCAGCTCACATGTAGGCTATCAGCTTAGCAAGAGGAAAAAGAAGAGGTAAGTGAAGATA  
AGATAATAATGTTGAAGATAAGATGTAGGGTGGGAGCCACCAGATCTTGCCTGCCTTTCCATCAACAA  
ATAATCCAAGTAAGAGGAGGACCGATGCTGATCCTTACCGCTATGGGTAAGATTTGATATGAGCTAAG  
CACATACGTCAGTGACCTCACATGTAGGCTATCAGCCTATATAAGGTTTTGCTATTCATTGAAAGCA  
GTAGTGACTGATTTGTATATA

>MinSyn\_1690|Strength:0.031152887

GCGTGTTCGTTTTAGTGAGGTTATGACCCCCGCCGATGACGCGGGACTGATCTTGCCTGCCTTTGAAGC  
ATCTTCTGCCTGCCTTGATGATCTGACGTAAGGGATGACGCACACACGACCACTATGCCCAATTAGG  
AGGTGGCTCCTACGTCACGACCACTATGCTCACTATCAGCAGCAAGACCTCTACAAAACCTGGTACTAT  
ATAAGGTTTTGCTATTCATTGAAAGCAGTAGTGACTGATTTGTATATA

>MinSyn\_1956|Strength:0.031224063

GCGTGTTCGTTTTAGTGAGGCTGACGTAAGGGATGACGCACACCTCACATGTAGGCTATCAGCTTAGCT  
GAAGATAAGATAATAATGTTGAAGATAAGAACAGGGCTCACTGCTAGGAGGACCGAGTGGGAGCCACC  
ACATGTAGGACAGTGGTCCCTCCACACCTATATAAGGTTTTGCTATTCATTGAAAGCAGTAGTGACTGA  
TTTGTATATA

>MinSyn\_1660|Strength:0.031258365

GCGTGTTCGTTTTAGTGAGGATGACGTAAGCCATGACGTCTACCGATGCTGATCTTGCCAAGATTGATG

AAAAGTCAAAAACAAAAATCAATTATCTGCCTTGGCTTTGTCAAAGCTAAAAAAGATGATGCTCACC  
AAATATTTCTTGTCTCACTGCTAGGCTATATAAGGTTTTGCTATTCATTGAAAGCAGTAGTGACTGAT  
TTGTATATA

>MinSyn\_1784|Strength:0.031329136

GCGTGTCTGTTTTAGTGAGGGCACACCAGCATGTGTTGATCACCAGCTCGCGGTAGATGACGTAAGCCA  
TGACGTCTAAGGTTGTCTATCGAAAGGACAGTATGTACAGGGCTGCTTTGTCAAAGCTAAAAAAGAT  
GATGCACAGCCACTTGTGTTTCAGTCAGAAGATCAAAGGGCTAACTCTATATAAGGTTTTGCTATTCAT  
TCAAAGCAGTAGTGACTGATTTGTATATA

>MinSyn\_1277|Strength:0.031825814

GCGTGTCTGTTTTAGTGAGGATCGAAAGGACAGTAGCCTGCCTTGATCAAATATTTCTTGTGTCTGCAC  
CTCACATGTAGGCTATATGACGTAAGCCATGACGTCTATATGCCCAATTAGGTTGTCAACCATTATTG  
CGATCAGCTTATTGCGATAAAGGAAAGGTTAGCAAGACCTCTACAAAAGTGGTACTTGCTATATAAGG  
TTTTGCTATTCATTGAAAGCAGTAGTGACTGATTTGTATATA

>MinSyn\_1739|Strength:0.031867253

GCGTGTCTGTTTTAGTGAGGATCCTTACCGCTATGGGTAAGATTGATCTATTGCGATAAAGGAAAGGCT  
ACAAAAGTGGTACTCAGAAGATCAAAGGGCTACCATGAAGATAAGATAATAATGTTGAAGATAAGAAC  
TATGCCCAATTAGGTTGTCAAATATTTCTTGTACTGGTACTTGTGTACAGGGGCTTTGTCAAAGCTA  
AAAAAGATGATGCCTATGACGTAAGCCATGACGTCTACATGTAGGCTATCAGCTAACCACGTCTACAA  
TGCACCTCACATGTAGGCTATCACTATATAAGGTTTTGCTATTCATTGAAAGCAGTAGTGACTGATTT  
GTATATA

>MinSyn\_1915|Strength:0.032036786

GCGTGTCTGTTTTAGTGAGGTCCATCAACAAATAATCCAAGTAAGGGACCGATGCTGATAACCACGTCT  
ACAAGACCACTATGCCCAATTAGGTTGTCTAGCAAGTGGATTAAGATTGATGAAAAGTCAAAAACAAA  
AATCAATTATCACGCAGTGGTCCCTCCACCTCACATGTAGGCTATCAGCTTAGCAAGACTGAAGATAA  
GATAATAATGTTGAAGATAAGACACTATGCCCAATTATGACCCCGCCGATGACGCGGGAAGTCTAA  
TGAGCTAAGCACATACGTCAGCTATCCTATATAAGGTTTTGCTATTCATTGAAAGCAGTAGTGACTGA  
TTTGTATATA

>MinSyn\_1840|Strength:0.032269512

GCGTGTCTGTTTTAGTGAGGTGAAGCATCTTCCAAATGACGTAAGCCATGACGTCTATCACTGCTAGGA  
GGGGAAAAAGAAGAGGTATTAGGTTGTCTGCACCTCACATGTAGGCGCTTTGTCAAAGCTAAAAAAG  
ATGATGCCAGCTTAGCAAGACCTCTACACTATATAAGGTTTTGCTATTCATTGAAAGCAGTAGTGACT  
GATTTGTATATA

>MinSyn\_1457|Strength:0.03249702

GCGTGTCTGTTTTAGTGAGGATCGAAAGGACAGTACCGATGCTGATCTTGCCTGCCTTGATTGAGAAGA  
TCAAAGGGCTAGATGCTGATCTTGCCTGCCTTGATGCAGCCACTTGTGTAAAAGTGGTACTTGTGTAC  
AGGGCTCACTTGAAGATAAGATAATAATGTTGAAGATAAGATAGGTTGTCTGCACCTCACATGAACCA  
TTATTGCGCATGAGCTAAGCACATACGTCAGATCAGCTGCACACCAGCATGTGTTGATCACCAGCTGC  
TCACTGCTAGGAGGACCGACTATATAAGGTTTTGCTATTCATTGAAAGCAGTAGTGACTGATTTGTAT  
ATA

>MinSyn\_1255|Strength:0.032614602

GCGTGTCTGTTTTAGTGAGGTTATGACCCCGCCGATGACGCGGGAGCCTGCCTTGATGATCAGTGGTC  
CCTCCACCTGGTACTTGTGTACAGGGCTCACTGCTAGCAAATATTTCTTGTCTATGCCCAATTAGGTT  
GTCTGCACCTTCTCTGCGACAGTGGTCCCAAATAGGAGGAAACCATTATTGCGTTGTGTACAGGG  
CTCACTGCTAGGTGAGAAGATCAAAGGGCTACACATGACGTAAGCCATGACGTCTATTGTGTACAGGG  
CTCACTGCTAGGAGGACTATATAAGGTTTTGCTATTCATTGAAAGCAGTAGTGACTGATTTGTATATA

>MinSyn\_1692|Strength:0.032626337

GCGTGTCTGTTTTAGTGAGGATTGCGATAAAGGAAAGGGCTATCAGCTTAGCAAGACCTCTGGAAAAA  
GAAGAGGTCTGGTACTTGTGTACAGCAGCCACTTGTGTCTGCCTTGATGATCAAATATTTCTTGTGT  
TGTCTGCACCTCACATGTAGGCTATCAGGCACACCAGCATGTGTTGATCACCAGCTCGATGCTGATCT  
TGCCTGATGAGCTAAGCACATACGTCAGATCAGCTTAGCAACCACGTCTACAATAGCAAGACCTCTAC  
AAAAGTGGTACTTGTCTATATAAGGTTTTGCTATTCATTGAAAGCAGTAGTGACTGATTTGTATATA

>MinSyn\_1332|Strength:0.032714788

GCGTGTCTGTTTTAGTGAGGCAAATATTTCTTGTGTTGTCTGCACCTCACATGTAGGCTATCATGGTGG  
AGCACGACAAGGTACGAGGTGGCTCCTACTAGGAGGAAAAATGTCAAAGATAACAGGGCTCACTGCT



ATCTCTCTGCCGACAGTGGTCCCAAAGGTCACGACCACTATGCCAGCAAGTGGATCCACTATGCCCAA  
TTAGGCTGACGTAAGGGATGACGCACAGTACAGTTATGACCCCCGCCGATGACGCGGGAGCTTAGCAA  
GACCTCTACAAACTCTATATAAGGTTTTGCTATTCATTGAAAGCAGTAGTGACTGATTTGTATATA  
>MinSyn\_1707|Strength:0.033309259  
GCGTGTCTGTTTTAGTGAGGGCACACCAGCATGTGTTGATCACCAGCTATTAGGTTGTCTCTCTGCC  
GACAGTGGTCCCAAACACTGCTAGGAACCATTATTGCGACTTGTGTACAGGGCTCATGAAGATAAGAT  
AATAATGTTGAAGATAAGAATCTTGCCTGCCTTGCAGTGGTCCCTCCACCTGCTAGGAGGACCGATGC  
TGATCTTGCATGAGCTAAGCACATACGTCAGGCGGAGGTGGCTCCTACCTCACTGCTAGGAGGACCGA  
TGCTGATCTCTATATAAGGTTTTGCTATTCATTGAAAGCAGTAGTGACTGATTTGTATATA  
>MinSyn\_1019|Strength:0.03370915  
GCGTGTCTGTTTTAGTGAGGTGAAGCATCTTCCCTACAGGGCTCACTGCTAGGAGGACCGATGATGACGT  
AAGCCATGACGTCTAGCAAGACCTCTACAAAACGCTTTGTCAAAGCTAAAAAGATGATGCACGACC  
ATGGTGGAGCACGACACGACCACTATGCCCAATTAGGTCTATATAAGGTTTTGCTATTCATTGAAAGC  
AGTAGTGACTGATTTGTATATA  
>MinSyn\_1107|Strength:0.033780574  
GCGTGTCTGTTTTAGTGAGGAAGATTGATGAAAAGTCAAAAACAAAATCAATTATGGTACTTGTGTAC  
AGGGCTCACTCACTATCAGCGCTAGGAGGACCGATGCTGATAGGTGGCTCCTACTGTCTGCACCTCAC  
ATCTCTCTGCCGACAGTGGTCCCAAATGTGTACAGGTGAAGCATCTTCCAATTAGGTTTTCAACAACA  
GCTTAGCAAGACCTCTACAACCTGACGTAAGGGATGACGCACACAAGACCTCTACAAAACCTGGTACTTG  
TGTCTATATAAGGTTTTGCTATTCATTGAAAGCAGTAGTGACTGATTTGTATATA  
>MinSyn\_1351|Strength:0.03382199  
GCGTGTCTGTTTTAGTGAGGTCTCTCTGCCGACAGTGGTCCCAAATGATATTGCGATAAAGGAAAGGCA  
AATCAGAAGATCAAAGGGCTATGCCCAATTATGACGTAAGCCATGACGTCTAGGTACTTGTGTAATCG  
AAAGGACAGTATGTACAGGGCTCACTGAACCATTATTGCGAGACAGTGGTCCCTCCACTACTATATAA  
GGTTTTGCTATTCATTGAAAGCAGTAGTGACTGATTTGTATATA  
>MinSyn\_1172|Strength:0.033825604  
GCGTGTCTGTTTTAGTGAGGATCGAAAGGACAGTACATGTAGGCTAATCCTTACCGCTATGGGTAAGAT  
TCTAGGAGGACCGATGCTGATGAAGCATCTTCCGTAGGAACCACGTCTACAATGTCTCACTATCAGCA  
GGACTCTCTCTGCCGACAGTGGTCCCAAATACTTGTGTACAGGGTTATGACCCCCGCCGATGACGCGG  
GAACCTCTACAAAACCTGGTACTAGGTGGCTCCTACGATGCTGATCATGAGCTAAGCACATACGTCAGG  
TCACGACTATATAAGGTTTTGCTATTCATTGAAAGCAGTAGTGACTGATTTGTATATA  
>MinSyn\_1681|Strength:0.033917155  
GCGTGTCTGTTTTAGTGAGGCAGTGGTCCCTCCACACAGGGCTCACTGCTAGGAGGACTTATGACCCCC  
GCCGATGACGCGGGATCGCGTGGTGGAGCACGACATTGCCTGCCTTGATTGAAGATAAGATAATAATG  
TTGAAGATAAGACTGATCTTGCCTGCCTTGATGATAAAAATGTCAAAGATAACCAATTAGGTTATGAGC  
TAAGCACATACGTCAGCTATGCCAAGATTGATGAAAAGTCAAAAACAAAATCAATTATGAGGACCG  
ATGCTGCTATATAAGGTTTTGCTATTCATTGAAAGCAGTAGTGACTGATTTGTATATA  
>MinSyn\_1673|Strength:0.033940344  
GCGTGTCTGTTTTAGTGAGGTTATGACCCCCGCCGATGACGCGGGATGCCTGCCTTGATGATACTGACG  
TAAGGGATGACGCACATTAGCAAGACCTCTACAAAAGTGGGAGCCACCAAGGTCACGACCACTATGCC  
CAATTAGATGACGTAAGCCATGACGTCTAACCTCACATGTAGGCTATCAGCTTAGCAAGCAGCCACTT  
GTGTCAAATTTTCGGGAAACCTCCTCGCACGACCACTATGCCCAATTAGGTCAGAAGATCAAAGGGCT  
AGCCCAATTAGGTTGTCTGCACCTCTGAAGATAAGATAATAATGTTGAAGATAAGAGGGCTCACTGCT  
AGGAGGACCGATGCATCGAAAGGACAGTATTAGGTTGTCTGCACCCTATATAAGGTTTTGCTATTCAT  
TGAAAGCAGTAGTGACTGATTTGTATATA  
>MinSyn\_1215|Strength:0.034010572  
GCGTGTCTGTTTTAGTGAGGTCACTATCAGCTTAGGTTGTCTGCACCTCACATGTGCACACCAGCATGT  
GTTGATCACCAGCTGCTTAGCAAGACCTCTACAATCCATCAACAAATAATCCAAGTAAGGTACAGGGC  
TCAGTGGGAGCCACCGATCTTGCCTGCCTTGGAAAAAGAAGAGGTATGCTGATCAAATATTTCTTGT  
CTTAGCAAGACCTCTACAAATGACGTAAGCCATGACGTCTAAGACCTCTACAAAACCTGGTACTTGTGT  
ACTATATAAGGTTTTGCTATTCATTGAAAGCAGTAGTGACTGATTTGTATATA  
>MinSyn\_1873|Strength:0.034245843  
GCGTGTCTGTTTTAGTGAGGTTTTCAACAAATTAGGTTGTCTGCACAGTGGTCCCTCCACGTCACGACC  
ACTATGCCCAAAGGTGGCTCCTACACCACTATGCCCAATTAGGTGTGGGAGCCACCACAGGGAAAAAT

GTCAAAGATAGCCCAATTAGGTTGTCTGCACCTCACATGTATTGCGATAAAGGAAAGGGCCCAATTAG  
GTTGTCTGCACCTCACATGTCTGACGTAAGGGATGACGCACAAGCAAGACCTCTACAAAAGTGGTCTA  
TATAAGGTTTTGCTATTCATTGAAAGCAGTAGTGACTGATTTGTATATA

>MinSyn\_1584|Strength:0.034279473

GCGTGTCTGTTTTAGTGAGGCTGACGTAAGGGATGACGCACATTGTCTGCACCTATTGCGATAAAGGAA  
AGGTCTGCACCTCACATGTAGGCTATCGGAAAAAGAAGAGGTTACTTGTGTACAGGGCTCACTGCTAG  
AGGTGGCTCCTACAGGCTATATAAGGTTTTGCTATTCATTGAAAGCAGTAGTGACTGATTTGTATATA

>MinSyn\_1664|Strength:0.03428934

GCGTGTCTGTTTTAGTGAGGCAAATATTTCTTGTGGCTCACTGCTAGGAGGACCGATTGAGAAGATCAA  
AGGGCTAGCTGATCTTGCCTGCCTTATGACGTAAGCCATGACGTCTACACCTCACATGTAGGCTAGCT  
TTGTCAAAGCTAAAAAGATGATGCTATCAGCTTAGCAAGACCTCTACAAAATATATAAGGTTTTGC  
TATTCATTGAAAGCAGTAGTGACTGATTTGTATATA

>MinSyn\_1871|Strength:0.034323268

GCGTGTCTGTTTTAGTGAGGTCATCAGCATTAGGTTGTCCAAATATTTCTTGTCTACAAGGAAAA  
AGAAGAGGTACGACCACTATGCCAATCCATCAACAAATAATCCAAGTAAGTGCTGATCTTGCTTATG  
ACCCCGCCGATGACGCGGGACTGAAGCATCTTCCCCTCACATGTAGGCTATCAGCTTAGCAAGTGG  
TCTTGTGTAAGGTGGCTCCTACCCTCTACAAAAGTGGTACTTGTATGAGCTAAGCACATACGTCAGCC  
TATATAAGGTTTTGCTATTCATTGAAAGCAGTAGTGACTGATTTGTATATA

>MinSyn\_1074|Strength:0.034720594

GCGTGTCTGTTTTAGTGAGGTCAGAAGATCAAAGGGCTACACTGCTAGGAGGACCGATGCTGATCTTGA  
TGACGTAAGCCATGACGTCTAGTCACGACCACTATGCCAATTAGGCAGTGGTCCCTCCACATCTTGG  
AAGCATCTTCCCTAGGAGGACAAAATGTCAAAGATAACCCTATATAAGGTTTTGCTATTCATTGAAA  
GCAGTAGTGACTGATTTGTATATA

>MinSyn\_1583|Strength:0.034817439

GCGTGTCTGTTTTAGTGAGGTTTTCAACAATTAGCAAGACCTCTACAAAAGTGGTACTTTCCATCAACA  
AATAATCCAAGTAAGACAAAAGTGGTACTTGTGTACTGAAGCATCTTCCCACATGTAGGCTATCAGCT  
TAGCAAGACCTAGCAAGTGGATGGAGGACCGACAAATATTTCTTGTAGCAAGACCTCCTGACGTAAG  
GGATGACGCACATGATGATAACCATTATTGCGTACAAAAGTGGTACTGGTGGAGCACGACACCTATAT  
AAGGTTTTGCTATTCATTGAAAGCAGTAGTGACTGATTTGTATATA

>MinSyn\_1288|Strength:0.035027297

GCGTGTCTGTTTTAGTGAGGAGGTGGCTCCTACGTAGGTCACGACCACTATGCCCATCCATCAACAAAT  
AATCCAAGTAAGTAGCAAGACCTCTACAAAAGTGGATTGCGATAAAGGAAAGGTGCACCAAAATATTC  
TTGTACATGTAGGCTATCAGCTTAGCTTTTCAACAATGGTACTTGTGTACAGGGCTATGACGTAAGC  
CATGACGTCTATCTTGCCTGCAACCATTATTGCGTTGTCTGCACCTCACATGTAGGCTACTATATAAG  
GTTTTGCTATTCATTGAAAGCAGTAGTGACTGATTTGTATATA

>MinSyn\_1911|Strength:0.035238308

GCGTGTCTGTTTTAGTGAGGATGACGTAAGCCATGACGTCTATGCACCTCACATGTAGGCTATCAGCTT  
AGCAATTCGGGAAACCTCCTCGGCGCTTTGTCAAAGCTAAAAAGATGATGCGTAGGTCACGCAGC  
CACTTGTGTTACACTATATAAGGTTTTGCTATTCATTGAAAGCAGTAGTGACTGATTTGTATATA

>MinSyn\_1449|Strength:0.035319412

GCGTGTCTGTTTTAGTGAGGATCGAAAGGACAGTACAAAAGTGGTACTTGTAGGTGGCTCCTACAAGT  
GTACTTGTGTATTTTCAACAATGCCTTAACCACGTCTACAAAAGTGGTACTTGTGTACATGAGCTAAGC  
ACATACGTCAGGGCTCAAATATTTCTTGTTCAGTCTAGGAGGACCCAGCCACTTGTGTAGGCTATCA  
GCTTTGAAGATAAGATAAATAATGTTGAAGATAAGAACAGGGCTCACTGCTAGGAGGACCCTATATAAG  
GTTTTGCTATTCATTGAAAGCAGTAGTGACTGATTTGTATATA

>MinSyn\_1741|Strength:0.035355146

GCGTGTCTGTTTTAGTGAGGTCCATCAACAAATAATCCAAGTAAGTCTTGGCACACCAGCATGTGTTG  
ATCACCAGCTTTGTCTGCACCTCACATGTAGGCTATCAGCTGACGTAAGGGATGACGCACAGGTA  
GTGTACAGGGCTCACTGCTTGGTGGAGCACGACCCGATGCTGATCTTGCCTGCCTTCTATATAAGG  
TTTGTATTCATTGAAAGCAGTAGTGACTGATTTGTATATA

>MinSyn\_1464|Strength:0.035822282

GCGTGTCTGTTTTAGTGAGGTCCATCAACAAATAATCCAAGTAAGAAAAGTGGTACTTAAAGATTGATGA  
AAAGTCAAAAACAAAATCAATTATAATTAGGTTGTCTGCACCTCACGTGGGAGCCACCACATGTAGG  
CTATCAGCTTAGCAAGACCTTCTCTCTGCCGACAGTGGTCCAAATACTTGTGTACAGGCTGACGTAA

GGGATGACGCACAAGGTCACGACCACTATGCCCAATTCAGCTGCTAGCTATATAAGGTTTTG  
CTATTCATTGAAAGCAGTAGTGACTGATTTGTATATA

>MinSyn\_1788|Strength:0.035920296

GCGTGTCTGTTTTAGTGAGGCAAATATTTCTTGTGCTTAGCAAGACCTCTACATCGAAAGGACAGTATT  
GTCTGCACCTCACATGTAGGCTATCTTATGACCCCGCGGATGACGCGGGAGTTGTCTGCACCTCAC  
ATTTTCAACAATCACGACCACTATGCCCAATTAGGGCACACCAGCATGTGTTGATCACCAGCTGACCT  
CTACAAAACCTGGTACTTGTGTACAATGAGCTAAGCACATACGTCAGTCAGCTCTATATAAGGTTTTGC  
TATTCATTGAAAGCAGTAGTGACTGATTTGTATATA

>MinSyn\_1947|Strength:0.036184301

GCGTGTCTGTTTTAGTGAGGATCCTTACCGCTATGGGTAAGATTGGTAGGTCACGACCACTATGCCCAA  
TTAATTGCGATAAAGGAAAGGGTTGTCTGCACCTCAAATTTTCGGGAAACCTCCTCGTATGCCCAATTA  
GGTTGAAGATAAGATAATAATGTTGAAGATAAGATAGGTTGTGCGCACACCAGCATGTGTTGATCACCA  
GCTACCTCTACAAAACCTGACGTAAGGGATGACGCACAGGACCGATGCTGATCTATATAAGGTTTTGC  
TATTCATTGAAAGCAGTAGTGACTGATTTGTATATA

>MinSyn\_1823|Strength:0.03680938

GCGTGTCTGTTTTAGTGAGGTTTTCAACAACCTCTACAAAACCTGGTACTTGTATGACGTAAGCCATGACG  
TCTATGTACAGGGCTCATGAAGCATCTTCTACAGTGGGAGCCACCAGACCACTATTCTCTCTGCCGA  
CAGTGGTCCCAAAGACCTCTACAACCTATATAAGGTTTTGCTATTTCATTGAAAGCAGTAGTGACTGAT  
TTGTATATA

>MinSyn\_1630|Strength:0.036840517

GCGTGTCTGTTTTAGTGAGGATCGAAAGGACAGTAGTCTGCACCTCACATGCTTTGTCAAAGCTAAAA  
AAGATGATGCAGTCTCTCTGCCGACAGTGGTCCCAAACGACCACTATGCCCAATTAGCAAATATTTCT  
TTGTGGGCTCACTGCTAGGAATGAGCTAAGCACATACGTCAGTAGCAAGACCTCTACAAAACCTGGTAT  
GAAGCATCTTCTGCCCAATTAGGTTGTCTGCACCTCACATGCTATATAAGGTTTTGCTATTTCATTGA  
AAGCAGTAGTGACTGATTTGTATATA

>MinSyn\_1723|Strength:0.036946569

GCGTGTCTGTTTTAGTGAGGCTGACGTAAGGGATGACGCACATACTTGTGTACAGGGCGGAAAAAGAAG  
AGGTACTAATTTTCGGGAAACCTCCTCGCAAACCTGGTACTTGTGTACAGGGCAAAAATGTCAAAGATA  
TGTACAGGGCTATATAAGGTTTTGCTATTTCATTGAAAGCAGTAGTGACTGATTTGTATATA

>MinSyn\_1021|Strength:0.037523589

GCGTGTCTGTTTTAGTGAGGTTATGACCCCGCGGATGACGCGGGATATCAGCTTAGCAAGACCTCTAC  
AAAATGGTGGAGCACGACAAGGTCACGACCACTATGCCCAATTAGGTATCCTTACCGCTATGGGTAAG  
ATTGGAGACCGATGCTGATCTTGCCTGCATGACGTAAGCCATGACGCTAGCCCAATTAGGTTGTCT  
GCACGTGGGAGCCACCATAGGAGGACCGATGCTGATCCTATATAAGGTTTTGCTATTTCATTGAAAGCA  
GTAGTGACTGATTTGTATATA

>MinSyn\_1939|Strength:0.037632911

GCGTGTCTGTTTTAGTGAGGCAGCCACTTGTGTCAAACCTGGTATCACTATCAGCACTTGTGTACAGGG  
CTCACTATCCTTACCGCTATGGGTAAGATTAGGGCTCACTGCTAATGAGCTAAGCACATACGTCAGCC  
TCACATGTAGGCTATCAAATTTTCGGGAAACCTCCTCGGTACAGGGCTTTGTCAAAGCTAAAAAAGAT  
GATGCTAGCAAGACCTCTACAAAACCTGGTACTTGTCTATATAAGGTTTTGCTATTTCATTGAAAGCAGT  
AGTGACTGATTTGTATATA

>MinSyn\_1075|Strength:0.03765868

GCGTGTCTGTTTTAGTGAGGAAAAATGTCAAAGATATATCAGCTTAGCAAGACCTCTACAAAATCGAA  
AGGACAGTAGCACCTCAAGGTGGCTCCTACCATGTAGGCATGAGCTAAGCACATACGTCAGGACCACT  
ATGCCAGCAAGTGGATTCACATCCTTACCGCTATGGGTAAGATTCTGCCTGAAGATAAGATAATAAT  
GTTGAAGATAAGAGACCGATGCTGATCTTGCCTGCCTTGTATATAAGGTTTTGCTATTTCATTGAAAG  
CAGTAGTGACTGATTTGTATATA

>MinSyn\_1436|Strength:0.037662506

GCGTGTCTGTTTTAGTGAGGGCACACCAGCATGTGTTGATCACCAGCTCAAGACCTCTACAAAACCTGGT  
CAGCCACTTGTGTCTATGCCCAATTAGGTTGAAGCATCTTCCCTACAAAACCTGGTACTTGTGTAAACCA  
CGTCTACAACCACTATGCCCAATTAGGTTGTCTGGTGGGAGCCACCAGGACCATGAGCTAAGCACATA  
CGTCAGGGTAGGTCACGACCACTATGCCCAATTAGGCTATATAAGGTTTTGCTATTTCATTGAAAGCAG  
TAGTGACTGATTTGTATATA

>MinSyn\_1340|Strength:0.037677702

GCGTGTGTTTTAGTGAGGATGACGTAAGCCATGACGTCTACCGCTTTGTCAAAGCTAAAAAGATG  
ATGCACCTCTACAAAAGTATGAGCTAAGCACATACGTCAGTACTTGTGTACAGGGCTCCAGCCACT  
TGTGTGGTTGTCTGCACCTCACATGTAGGCAGTGGTCCCTCCACGTACAGGGCTCACTGCTAGGAGGA  
CCGATCCTTACCGCTATGGGTAAGATTGCTATCACTATCAGCCTCTATATAAGGTTTTGCTATTCATT  
GAAAGCAGTAGTACTGATTTGTATATA

>MinSyn\_1291|Strength:0.037694745

GCGTGTGTTTTAGTGAGGATTGCGATAAAGGAAAGGCCTCTACAAAAGTGGTACTTGTATCGAAAGG  
ACAGTACATGTAGGTTTTCAACAACGATGCTGATAACCATTATTGCGACCGATGCTGATCTTGCCTAG  
CAAGTGGATAAAAAGTGGTACTTGTGTACAGGGATGACGTAAGCCATGACGTCTAAGGTCACGACCACT  
ATGCCAATTAGGTTGCAAATATTTCTTGTGTTGTGCTATATAAGGTTTTGCTATTCATTGAAAGCAGT  
AGTGACTGATTTGTATATA

>MinSyn\_1097|Strength:0.037756714

GCGTGTGTTTTAGTGAGGTCCATCAACAAATAATCCAAGTAAGCACTGCTAGGAGGACCGATGCTGA  
TCTTGCTGGTGGAGCACGACACACGACCACTATGCCAATTAGGTTGTCTGATCCTTACCGCTATGGG  
TAAGATTAGGACCGATGCTGATCTATGAGCTAAGCACATACGTCAGGCTATCAGCTTAGCAAGACCTC  
TACATCACTATCAGCCAATTAGGTTGTCTGCACCTCTATATAAGGTTTTGCTATTCATTGAAAGCAGT  
AGTGACTGATTTGTATATA

>MinSyn\_1522|Strength:0.037784038

GCGTGTGTTTTAGTGAGGTGAAGCATCTCCAGCAAGACCTCTACAAAAGTGGTACAGGTGGCTCCT  
ACCTGCCTTGATGACAAATATTTCTTGTAGGTCACGACCACTATGCCAATTAGGTTGTGGGAGCCAC  
CACAGGGCGGAAAAGAAGAGGTCAGCTTAGCAAATCCTTACCGCTATGGGTAAGATTATTAGGTTGT  
CTGCACCTGACGTAAGGGATGACGCACAATGTAGGCTCTATATAAGGTTTTGCTATTCATTGAAAGCA  
GTAGTGACTGATTTGTATATA

>MinSyn\_1523|Strength:0.037792821

GCGTGTGTTTTAGTGAGGATGACGTAAGCCATGACGTCTATGTGTACAGGGCTCACTGCTAGGAGGA  
CCGTCAGAAGATCAAAGGGCTATTGGTGGAGCACGACATCAAGGTGGCTCCTACGACCTCTACAAAAC  
TGGTACTCTATATAAGGTTTTGCTATTCATTGAAAGCAGTAGTGACTGATTTGTATATA

>MinSyn\_1954|Strength:0.03783838

GCGTGTGTTTTAGTGAGGAGGTGGCTCCTACGGACCGATGCTTGGTGGAGCACGACATCGCGGTAAT  
GACGTAAGCCATGACGTCTATCTACAAAAGTGGTACTTGTGTACAGGGCACACCAGCATGTGTTGATC  
ACCAGCTAGGACCGATGCTGATCTTGCCTCTATATAAGGTTTTGCTATTCATTGAAAGCAGTAGTGAC  
TGATTTGTATATA

>MinSyn\_1359|Strength:0.037868422

GCGTGTGTTTTAGTGAGGTGAAGCATCTTCCACTTTTTCAACAAGTATCTTGCCTGCAACCATTA  
TTGCGTAGGAACCACGTCTACAACAAAAGTGGTACTTGTGTACAGGGCTCACAATTTGCGGAAACCTC  
CTCGTTGCCTGCCTTAAGATTGATGAAAAGTCAAAAACAAAATCAATTATTTACAGCCACTTGTGTC  
CCAATTAATGACGTAAGCCATGACGTCTAAGGACCGATGCTATATAAGGTTTTGCTATTCATTGAAAG  
CAGTAGTGACTGATTTGTATATA

>MinSyn\_1069|Strength:0.037875138

GCGTGTGTTTTAGTGAGGTGAAGCATCTTCCAATTAGGTTGTCTGCACCTCACATTGCGATAAAGGA  
AAGGCTTTTTCAACAAGCTTAGCAAGACCTCTACAAAAATTTGCGGAAACCTCCTCGAATGAGCTAA  
GCACATACGTCAGGGTCACGACCACTATGCCAATTAGTCAGAAGATCAAAGGGCTATTTTATGACCC  
CCGCCGATGACGCGGGAACAGGGCTCACTGCTAGGAGGCTATATAAGGTTTTGCTATTCATTGAAAGC  
AGTAGTGACTGATTTGTATATA

>MinSyn\_1628|Strength:0.038223418

GCGTGTGTTTTAGTGAGGGCTTTGTCAAAGCTAAAAAGATGATGCCACTGCTAGGAGGACCGATG  
CTGATGGTGGAGCACGACATCTACAATGACGTAAGCCATGACGTCTAGGACCGATGCTGATCTTGCCTG  
AAGCATCTTCCACATGTAGGCTATCAGCTTAGCAAGACCCTATATAAGGTTTTGCTATTCATTGAAA  
GCAGTAGTGACTGATTTGTATATA

>MinSyn\_1122|Strength:0.038248778

GCGTGTGTTTTAGTGAGGCTGACGTAAGGGATGACGCACATGATGATAGTGGGAGCCACCAGCACCT  
CACTCAGAAGATCAAAGGGCTATGATCTTGCCTGCCTTTTATGACCCCGCCGATGACGCGGGACTGA  
TCTTGCCTATATAAGGTTTTGCTATTCATTGAAAGCAGTAGTGACTGATTTGTATATA

>MinSyn\_1432|Strength:0.038521396

GCGTGTGTTTTAGTGAGGAGGTGGCTCCTACGAGGACCGATGCTGATCTTGCCTGACGTAAGGGAT  
GACGCACAGTGTAATTTTCGGGAAACCTCCTCGTGCCTTGATCTCTCTGCCGACAGTGGTCCCAAATTA  
GCAAGACCTCTACAAAACGGTCTATATAAGGTTTTGCTATTCATTGAAAGCAGTAGTGACTGATTTG  
TATATA

>MinSyn\_1472|Strength:0.038559512

GCGTGTGTTTTAGTGAGGTGAGAAGATCAAAGGGCTATGGTACTTGTGTACAGGCACACCAGCATGT  
GTTGATCACCAGCTAGGCTATGAGCTAAGCACATACGTCAGTTAGCAAGACCTCTACAAAACGGTAC  
TAAGATTGATGAAAAGTCAAAAACAAAATCAATTATTCACGACCACTATGCCCAATAGGTGGCTCCT  
ACGCAAGACCTCTACAAAACGGTACTTGTGCTATATAAGGTTTTGCTATTCATTGAAAGCAGTAGTG  
ACTGATTTGTATATA

>MinSyn\_1509|Strength:0.038617148

GCGTGTGTTTTAGTGAGGTTATGACCCCCGCCGATGACGCGGGATACTTGTGTACAGGGCTCACTGC  
AACCACGTCTACAAGCAGCTTTGTCAAAAAGCTAAAAAGATGATGCGGCTATTTTCAACAAGCTTAGC  
AAGACCTCTACAAAACGGCAGCCACTTGTGTGCAAATATTTCTTGTATCAGCTTAGCAAGACCTCT  
ACAAAATGAGCTAAGCACATACGTCAGGGCTATATAAGGTTTTGCTATTCATTGAAAGCAGTAGTGAC  
TGATTTGTATATA

>MinSyn\_1774|Strength:0.038813273

GCGTGTGTTTTAGTGAGGAGCAAGTGGATGGGCTTCACTATCAGCCAGCTTAGCAAGATTTTCAACA  
AGATGCAAAAATGTCAAAGATACAGCTTAGCAAGACCTCCAGTGGTCCCTCCACTAGGTTGTCTGCAC  
CTCACAATGAGCTAAGCACATACGTCAGATCAGCTTAGCAATTGCGATAAAGGAAAGGTGCTAGGAGG  
ACCGATGCTGATCTGTGGGAGCCACCACTCTATATAAGGTTTTGCTATTCATTGAAAGCAGTAGTGAC  
TGATTTGTATATA

>MinSyn\_1173|Strength:0.038841341

GCGTGTGTTTTAGTGAGGTGGTGGAGCACGACACTGCACCTCACATGTAGGCTATCAGCTTAGCAAG  
TGGATCACCTCACATGTAGGCTATCAGCTTAAAAATGTCAAAGATAGTCTGAACCATTATTGCGAGCA  
AGACCTCTACAAAACGGTACTCAGAAGATCAAAGGGCTAACTTGTGTACAGGGCTCACCTGACGTAA  
GGGATGACGCACAAATTAGGTTGTCTGCTATATAAGGTTTTGCTATTCATTGAAAGCAGTAGTGACTG  
ATTTGTATATA

>MinSyn\_1001|Strength:0.038882142

GCGTGTGTTTTAGTGAGGTCACTATCAGCGCAGCAAGTGGATCACCTCACATGTAGGCTATCAGCTT  
AGCAGTGGGAGCCACCACAGGGCTCACTGCTGAAGATAAGATAATAATGTTGAAGATAAGATTAGCAA  
GACCTCTACAAAACATGAGCTAAGCACATACGTCAGCTCACATATCCTTACCGCTATGGGTAAGATTC  
CTCACATGTAGGCTATCAGCTTAGCAAGCTATATAAGGTTTTGCTATTCATTGAAAGCAGTAGTGACT  
GATTTGTATATA

>MinSyn\_1406|Strength:0.038906411

GCGTGTGTTTTAGTGAGGTCCATCAACAAATAATCCAAGTAAGGTGTAATTTTCGGGAAACCTCCTCG  
CAGGGCTCACTGCTAGGAGGACAGGTGGCTCCTACCTGGTGGAGCACGACACAAATGAGCTAAGCACA  
TACGTCAGATCAAACCATTATTGCGCTCTACCAGTGGTCCCTCCACCTCACATGTAGGCTATCAGCTT  
AGCAAATCCTTACCGCTATGGGTAAGATTACCTATATAAGGTTTTGCTATTCATTGAAAGCAGTAGTG  
ACTGATTTGTATATA

>MinSyn\_1839|Strength:0.038968452

GCGTGTGTTTTAGTGAGGAATTTTCGGGAAACCTCCTCGGGTAGGTCACGACCACTATGGCTTTGTCA  
AAAGCTAAAAAGATGATGCGCGGATTGCGATAAAGGAAAGGGACCTCTACATCACTATCAGCTAGGT  
CACGACCACTATGCCCAATGAGCTAAGCACATACGTCAGTATCAGTGGTCCCTCCACTACTTGTGTAC  
ATTTTCAACAATGCTGATCTTGCCTGCCTATATAAGGTTTTGCTATTCATTGAAAGCAGTAGTGACTG  
ATTTGTATATA

>MinSyn\_1602|Strength:0.039039844

GCGTGTGTTTTAGTGAGGTCTCTCTGCCGACAGTGGTCCCAAACACCTCAGAAGATCAAAGGGCTAT  
GTACAGGGCTCACTGCTAGGAGTCCATCAACAAATAATCCAAGTAAGAGCAAGACCTCTACAAAACGG  
GTAATGAGCTAAGCACATACGTCAGTAGGAGGACCGATGCTGATCTTGCCTTTTTCAACAATGTGTAC  
AGGGCTCACAGTGGTCCCTCCACTCACCTATATAAGGTTTTGCTATTCATTGAAAGCAGTAGTGACTG  
ATTTGTATATA

>MinSyn\_1331|Strength:0.039153927

GCGTGTGTTTTAGTGAGGAAGATTGATGAAAAGTCAAAAACAAAATCAATTATCTGATCTTGCCTG

CCTTGCAGCCACTTGTGTGATGATATCGAAAGGACAGTACCAATTAGGTATCCTTACCGCTATGGGTA  
AGATTGCTGGTGGAGCACGACAGATATGAGCTAAGCACATACGTCAGCCGATGCTGATCTTGCCTTAT  
GACCCCGCCGATGACGCGGGAACCTCTACTATATAAGGTTTTGCTATTCATTGAAAGCAGTAGTGAC  
TGATTTGTATATA

>MinSyn\_1769|Strength:0.039244143

GCGTGTCTGTTTTAGTGAGGTCCATCAACAAATAATCCAAGTAAGCAAGACCTCTACAAAACCTGGTACT  
TGTAGGTGGCTCCTACCAGGGCTCACTGCTAATTGCGATAAAGGAAAGGCAAAATCGAAAGGACAGTA  
GCAAGACCTCTACAAAACCTGGTACTTGTGAGCAAGTGGATCTTAGCAAGACCTCTATGAGCTAAGCAC  
ATACGTCAGCAAAAACCTGGTACTTCTATATAAGGTTTTGCTATTCATTGAAAGCAGTAGTGACTGATTT  
GTATATA

>MinSyn\_1640|Strength:0.039416757

GCGTGTCTGTTTTAGTGAGGAAAATGTCAAAGATAGCTTGAAGATAAGATAATAATGTTGAAGATAAG  
AACAGTGGTCCCTCCACTTAGGTTGTCTGCACCTCACATGTAGTCAGAAGATCAAAGGGCTATATCAG  
CTTAGCAAGACCTCAGGTGGCTCCTACTTAGGTTGTCTGCACCTCACATGTAGGATGAGCTAAGCACA  
TACGTCAGTAGGTCACGACCACTCTATATAAGGTTTTGCTATTCATTGAAAGCAGTAGTGACTGATTT  
GTATATA

>MinSyn\_1458|Strength:0.039604634

GCGTGTCTGTTTTAGTGAGGTCCATCAACAAATAATCCAAGTAAGCTTAGCAAGACAGGTGGCTCCTAC  
GGAGGACAATTTGCGGAAACCTCCTCGAGGTTGTCTGCATCTCTCTGCCGACAGTGGTCCAAAACGA  
CCATGAGCTAAGCACATACGTCAGTCACTGCTAGGAGGACCGATTGGTGGAGCACGACAGACCATTGC  
GATAAAGGAAAGGTTGCCTGCCTTGCTATATAAGGTTTTGCTATTCATTGAAAGCAGTAGTGACTGAT  
TTGTATATA

>MinSyn\_1023|Strength:0.039664696

GCGTGTCTGTTTTAGTGAGGTCACTATCAGCGCGGAAAAGAAGAGGTGCTCACTGCAAAAATGTCAA  
GATAACTGCTAGGAGGACCGATGCTGATCTTGCTTTTCAACAAGCAACAGCCACTTGTGTACCACATG  
AGCTAAGCACATACGTCAGGCTATCAGCTTAGCCAAATATTTCTTGTCTCTACAAAACCTGGTACTTG  
TGTAATCGAAAGGACAGTACTGCCTATATAAGGTTTTGCTATTCATTGAAAGCAGTAGTGACTGATTT  
GTATATA

>MinSyn\_1516|Strength:0.039855518

GCGTGTCTGTTTTAGTGAGGAGGTGGCTCCTACCCTCACATGTAGGCTATCAGCTTAGCAGCCACTTGT  
GTCTTGCCTGCCTTGATAATTTGCGGAAACCTCCTCGAGACCTCTACAAAACCTGGTACTTGTGTGGTG  
GAGCACGACATGTAGGCTATCAAATATTTCTTGTAACCAGTGGTCCCTCCACCCTTGATGATGACGT  
AAGCCATGACGTCTACTTGTGTCTATATAAGGTTTTGCTATTCATTGAAAGCAGTAGTGACTGATTTG  
TATATA

>MinSyn\_1606|Strength:0.040005833

GCGTGTCTGTTTTAGTGAGGGTGGGAGCCACCATACAGGGCTCACTGCTACAAATATTTCTTGTTGCTA  
GGAGTCCATCAACAAATAATCCAAGTAAGTCTGCACCTCACATGTAGGCTATCAGTCACTATCAGCGC  
TTAGCAAGATGACGTAAGCCATGACGTCTAACCGATGCTGATCTTGCCTGCCTTGAGGAAAAGAAGA  
GGTTCACATGTAGGCTATCCTATATAAGGTTTTGCTATTCATTGAAAGCAGTAGTGACTGATTTGTAT  
ATA

>MinSyn\_1421|Strength:0.040179224

GCGTGTCTGTTTTAGTGAGGTTTTCAACAATACTTGTGTACAGGGGTGGGAGCCACCAACAGTGGTCCC  
TCCACTCTTGCCTGCCTTGATATCCTTACCCTATGGGTAAGATTGCTCACTGCTAAAAATGTCAAAG  
ATAGCTCACTGCTAGGAGGACCGATGGCTTTGTCAAAGCTAAAAAAGATGATGCAAAAACCTGACGTAA  
GGGATGACGCACATGCTCTATATAAGGTTTTGCTATTCATTGAAAGCAGTAGTGACTGATTTGTATAT  
A

>MinSyn\_1042|Strength:0.040224872

GCGTGTCTGTTTTAGTGAGGTGAAGATAAGATAATAATGTTGAAGATAAGAGTACAGGTTTTCAACAAG  
GTAGGTCACGACCACTATGCATGAGCTAAGCACATACGTCAGACTATGCCCTCACTATCAGCGTCACG  
ACCACTATGCCCCAGCCACTTGTGTATGTAGGCTATCAGCTTAGCAAGACCTCTCCATCAACAAATAA  
TCCAAGTAAGGACCTCTACCTATATAAGGTTTTGCTATTCATTGAAAGCAGTAGTGACTGATTTGTAT  
ATA

>MinSyn\_1135|Strength:0.040281838

GCGTGTCTGTTTTAGTGAGGATCCTTACCGCTATGGGTAAGATTCGCGGTAGGTCACGACCACTATGCT

TTGTCAAAGCTAAAAAGATGATGCTCTACAAAAGCTGGTCACTATCAGCTTAGGTCCATCAACAAAT  
AATCCAAGTAAGCCTTGCTGACGTAAGGGATGACGCACAAGGGCTATGACGTAAGCCATGACGTCTAG  
GCTCACTGCTAGGAGGACCGATGTTTTCAACAATTGTCTGCACCTCACATGTAGGCTAAAAATGTCAA  
AGATAGGAGGACCGATGCTGATCTTGCCTGCCTATATAAGGTTTTGCTATTCATTGAAAGCAGTAGTG  
ACTGATTTGTATATA

>MinSyn\_1901|Strength:0.040446364

GCGTGTCTGTTTTAGTGAGGTTATGACCCCCGCCGATGACGCGGGACAGGGCTCAACCACGTCTACAAT  
GGTACTTGTGTACAGGGCTCACTGCTTCTCTCTGCCGACAGTGGTCCCAAACCTCACATGTAGGCTAT  
CAGCTTAGCAAGATCAGAAGATCAAAGGGCTATGATCAGCCACTTGTGTCTCAATGACGTAAGCCATG  
ACGTCTACAGGGCTCACTCTATATAAGGTTTTGCTATTCATTGAAAGCAGTAGTGACTGATTTGTATA  
TA

>MinSyn\_1893|Strength:0.040637912

GCGTGTCTGTTTTAGTGAGGAACACGTCTACAAAGACCTCTACAAAAGCTGGTACTTGTAAAAATGTCA  
AAGATATGGTACTTGTGCTTTGTCAAAGCTAAAAAGATGATGCATCTTGCAAGATTGATGAAAAGT  
CAAAAACAAAAATCAATTATTATGCCCAATTAGGTTATGACGTAAGCCATGACGTCTAACAAAAGCTGG  
TACTTGTGTACAGGGCTATATAAGGTTTTGCTATTCATTGAAAGCAGTAGTGACTGATTTGTATATA

>MinSyn\_1593|Strength:0.040845949

GCGTGTCTGTTTTAGTGAGGTTATGACCCCCGCCGATGACGCGGGACGGTAGGTCACGACCACTATGCC  
CAATTAGATGAGCTAAGCACATACGTACAGCAGGGCTCACTGCTAGGAGGACCGATGTCAGAAGATCAA  
AGGGCTATTGTGTACAGGGCTCACTGCTAGGAGCAAGTGGATCGGTAGGTCACGACCACTATATTGCC  
ATAAAGGAAAGGGCTATATAAGGTTTTGCTATTCATTGAAAGCAGTAGTGACTGATTTGTATATA

>MinSyn\_1438|Strength:0.041506704

GCGTGTCTGTTTTAGTGAGGGCTTTGTCAAAGCTAAAAAGATGATGCTGCACCTCACATGTAGGAGG  
TGGCTCCTACGTAGGCTATCAGCTTAGCAAGACCTCTAATGAGCTAAGCACATACGTACAGAAAAGCTGG  
TACTTGTATTGCGATAAAGGAAAGGTACAAAAGCTGGGTGGGAGCCACCAACGACCACTATGCCCATTTT  
CAACAAGCCCCTATATAAGGTTTTGCTATTCATTGAAAGCAGTAGTGACTGATTTGTATATA

>MinSyn\_1376|Strength:0.041565253

GCGTGTCTGTTTTAGTGAGGATTGCGATAAAGGAAAGGCTTAGCAAGACCTCTACAAAAGCTGGTACTTA  
AGATTGATGAAAAGTCAAAAACAAAAATCAATTATCCAAATATTTCTTGTGGTTGTCTGCACCTCAC  
ATGTAGGCATGACGTAAGCCATGACGTCTAGTAGGCTATCAGCTTAGCAAGACCTCTAAGGTGGCTCC  
TACAGACCTCTATATAAGGTTTTGCTATTCATTGAAAGCAGTAGTGACTGATTTGTATATA

>MinSyn\_1834|Strength:0.041628952

GCGTGTCTGTTTTAGTGAGGATTGCGATAAAGGAAAGGCGCAAAAATGTCAAAGATAGGCTCACTGCTA  
GGAGGAAATTTGCGGAAACCTCCTCGGGAGGACCGATGCTGATCTTGCCTTATGACCCCCGCCGATGA  
CGCGGGACGACCACTATGCCCATGAGCTAAGCACATACGTACAGGTCACTATCAGCCAAAAGCTGGTACT  
TGTGTACAGCTATATAAGGTTTTGCTATTCATTGAAAGCAGTAGTGACTGATTTGTATATA

>MinSyn\_1805|Strength:0.041662376

GCGTGTCTGTTTTAGTGAGGTCCATCAACAAATAATCCAAGTAAGACCACGCTTTGTCAAAGCTAAAA  
AAGATGATGCCTGCTAGGAGGACCGATGCTGATCTTTCAGAAGATCAAAGGGCTAGGACTTGTGTAC  
AGGGCTCACTGCTAGGATCGAAAGGACAGTAAAGACCTCTAATGACGTAAGCCATGACGTCTAATTCT  
GACGTAAGGGATGACGCACAATTAGGTTGTCTGCACCTCACATGTTTTTCAACAAGCTAGGAGGAC  
CGATGGAAAAAGAAGAGGTCATGTAGGCTATCAGCCTATATAAGGTTTTGCTATTCATTGAAAGCAGT  
AGTGACTGATTTGTATATA

>MinSyn\_1650|Strength:0.041791062

GCGTGTCTGTTTTAGTGAGGGGAAAAAGAAGAGGTTTTGCCTGCCTTTGGTGGAGCACGACAGACCACTA  
TGCCCAATATGAGCTAAGCACATACGTACAGGCTGATAATTTGCGGAAACCTCCTCGGCCCAATTAGGT  
TGTCTGAACCATTATTGCGGATCAGAAGATCAAAGGGCTATCTGCACCTCACATGTTCACTATCAGC  
GCCTTGATGACTATATAAGGTTTTGCTATTCATTGAAAGCAGTAGTGACTGATTTGTATATA

>MinSyn\_1913|Strength:0.042714657

GCGTGTCTGTTTTAGTGAGGAAGATTGATGAAAAGTCAAAAACAAAAATCAATTATGCCCAATTAGGTT  
GTCTGCACCTCATTTTTCAACAAGCTACAAAAGCTGGTACTTGTGTACAGGGCTCAGAAGATCAAAGGGCT  
ACTATCATGAGCTAAGCACATACGTACAGCTCTACAAAAGCTCCATCAACAAATAATCCAAGTAAGATG  
TAGCTATATAAGGTTTTGCTATTCATTGAAAGCAGTAGTGACTGATTTGTATATA

>MinSyn\_1223|Strength:0.04273176

CGGTGTCGTTTTAGTGAGGGCTTTGTCAAAAAGCTAAAAAAGATGATGCTTAGGTTGTCTGCACCTCAC  
ATGTAGATGAGCTAAGCACATACGTCAGGGACCGATGCTGATTTTTCAACAAGCTTAATTTTCGGGAAA  
CCTCCTCGGATGCTGATCTTGCCTGCGTGGGAGCCACCACTCGCACACCAGCATGTGTTGATCACCAG  
CTCCCTATATAAGGTTTTGCTATTCATTGAAAGCAGTAGTGACTGATTTGTATATA

>MinSyn\_1267|Strength:0.042949638

CGGTGTCGTTTTAGTGAGGTCTCTCTGCCGACAGTGGTCCCAAAGCTTAGCAAGACCTCTACAAAAC  
GGTACTATTGCGATAAAGGAAAGGATCTTGCCTGCCTTGATATGAGCTAAGCACATACGTCAGAGGAC  
CGATGCTGATCTTGCCTGCCTTGATCAGTGGTCCCTCCACACTGCTAGGAGGACCGATGCTGATCTTC  
TATATAAGGTTTTGCTATTCATTGAAAGCAGTAGTGACTGATTTGTATATA

>MinSyn\_1013|Strength:0.043091941

CGGTGTCGTTTTAGTGAGGCTGACGTAAGGGATGACGCACATACAAAACCTGGTACTTGTGTA  
CTGCGGACAGTGGTCCCAAATAGGTTGTCTGATCCTTACCGCTATGGGTAAGATTACAGGCTATAT  
AAGTTTTGCTATTCATTGAAAGCAGTAGTGACTGATTTGTATATA

>MinSyn\_1411|Strength:0.043127465

CGGTGTCGTTTTAGTGAGGAACCATTATTGCGGCCAATTAGGTTGTCTGACGTAAGGGATGACGCA  
CATCGCGGTAGGTCACGACCACTATGGCACACCAGCATGTGTTGATCACCAGCTGTCTGCACCTCACA  
TGTAGGCTATATAAGGTTTTGCTATTCATTGAAAGCAGTAGTGACTGATTTGTATATA

>MinSyn\_1860|Strength:0.0434633

CGGTGTCGTTTTAGTGAGGTCCATCAACAAATAATCCAAGTAAGTGTGTACAGGGCTCACTTGAAGCA  
TCTTCCCAGGGCTCACTGCTAGGAGGACCGATGAGCTAAGCACATACGTCAGTGTGTACAGTGGGAGC  
CACCAGAGGACCGATGCTTGAAGATAAGATAATAATGTTGAAGATAAGAGAACCACGTCTACAATGAT  
CTATATAAGGTTTTGCTATTCATTGAAAGCAGTAGTGACTGATTTGTATATA

>MinSyn\_1711|Strength:0.043684269

CGGTGTCGTTTTAGTGAGGCAGCCACTTGTGTGGAGGACCGATGCTGATCTTGCCTGCCTCACTATCA  
GCGCGGTAGGTCACGACCACTATGCCCAATTTTTTCAACAACACTGCTAGGAGGGGAAAAAGAGG  
TCGCGGTAGGTCACGACCAATGACGTAAGCCATGACGTCTAAGGCTATCAGCTTAGCAAGACCTATAT  
AAGTTTTGCTATTCATTGAAAGCAGTAGTGACTGATTTGTATATA

>MinSyn\_1574|Strength:0.04401541

CGGTGTCGTTTTAGTGAGGCTGACGTAAGGGATGACGCACAGTGTACAGGGCTCACTGCTAGGATCGA  
AAGGACAGTATAGGAGGACCGATGCTGATCTTGCCTGGGAGCCACCACTGCTAGGAGGACCGATGGTG  
GAGCACGACACCAATATGACGTAAGCCATGACGTCTAGGACCGATGCTGATCTTGCCTGCCTTGATG  
AAGATAAGATAATAATGTTGAAGATAAGAAATTAGGTTGTCTGCACCTCACATGTAGGCTCCATCAAC  
AAATAATCCAAGTAAGAGACCTCTACAAAACCTGGTACTTGTGTAAGGTGGCTCCTACCTACAAAAGAT  
TGATGAAAAGTCAAAAACAAAATCAATTATATCTTGCCTGCTATATAAGGTTTTGCTATTCATTGAA  
AGCAGTAGTGACTGATTTGTATATA

>MinSyn\_1401|Strength:0.044221534

CGGTGTCGTTTTAGTGAGGAGGTGGCTCCTACCTTAGCAAGACCTCTACAAAACCTGGTACTTTCTCTC  
TGCCGACAGTGGTCCCAAAGTCTGCACCTCACATGTAGGCTATCAGCTTATGACGTAAGCCATGACGT  
CTAGTATTGCGATAAAGGAAAGGAGGGCACACCAGCATGTGTTGATCACCAGCTCTCATATGTCTATA  
TAAGGTTTTGCTATTCATTGAAAGCAGTAGTGACTGATTTGTATATA

>MinSyn\_1614|Strength:0.044605993

CGGTGTCGTTTTAGTGAGGCTGACGTAAGGGATGACGCACAGCTCACTGCTAGGAGGACCGATATCCT  
TACCGCTATGGGTAAGATTGATGCTGATCTTGCCTGCCGAAAAAGAAGAGGTCTTGTCTATATAAGG  
TTTTGCTATTCATTGAAAGCAGTAGTGACTGATTTGTATATA

>MinSyn\_1621|Strength:0.044648

CGGTGTCGTTTTAGTGAGGTCCATCAACAAATAATCCAAGTAAGCTTGATCGAAAGGACAGTAATGCC  
CAATTAGGTTGTCTGCACCTCACATAATTTTCGGGAAACCTCCTCGCGCAGCCACTTGTGTGTTGAAGC  
ATCTTCCGTTGTCTGCACCTCACATGTACTGACGTAAGGGATGACGCACATTGCCTGCCTATATAAG  
GTTTTGCTATTCATTGAAAGCAGTAGTGACTGATTTGTATATA

>MinSyn\_1877|Strength:0.044670426

CGGTGTCGTTTTAGTGAGGCAAATATTTCTTGTTCACATGTAGGCTATCAGCTTAGCAAGACCAGCAA  
GTGGATACCTCTACAAAACCTGGTACTATGAGCTAAGCACATACGTCAGGCGGTAGGCTTTTTCAACAA  
GACCGATGCTGATCTTGAACCACGTCTACAAGCTAGGAGGACCGATGCTGATCTTGTCTATATAAGG  
TTTGTCTATTCATTGAAAGCAGTAGTGACTGATTTGTATATA



>MinSyn\_1587|Strength:0.044797655  
GCGTGTCTGTTTTAGTGAGGAACCACGTCTACAAGTCACGACCACTTCCATCAACAAATAATCCAAGTA  
AGACAGGGCTCACTGCTAGGAGGACCGAGGAAAAAGAAGAGGTTTTGTGTACAGGGCTCACATGACGTA  
AGCCATGACGTCTATTGTCTGCACCTCACATGTAGTGGGAGCCACCAGACCTCTACACTATATAAGGT  
TTTGCTATTCATTGAAAGCAGTAGTGACTGATTTGTATATA

>MinSyn\_1095|Strength:0.045045225  
GCGTGTCTGTTTTAGTGAGGCTGACGTAAGGGATGACGCACAAGGCAGCCACTTGTGTCTATGCCCAAT  
TAACCACGTCTACAATTGCCTGCATTGCGATAAAGGAAAGGACCGATGCTGATCTTGCTATATAAGGT  
TTTGCTATTCATTGAAAGCAGTAGTGACTGATTTGTATATA

>MinSyn\_1077|Strength:0.04522081  
GCGTGTCTGTTTTAGTGAGGGTGGGAGCCACCAGTTTTCAACAACAGGGCTCACTGCTAGGAATGAGCT  
AAGCACATACGTCAACCTCACATGTAGGCTATCAGCTTAGCAAACCATTATTGCGTCTTGCCCTGCCC  
TGACGTAAGGGATGACGCACATTAGGTTGTCTGCACCTCACATGTAGGTCCATCAACAAATAATCCAA  
GTAAGGGTACATTGCGATAAAGGAAAGGACAGGGCTCACTGCTAGGAGATCGAAAGGACAGTACTCTA  
CATGGTGGAGCACGACACTCACATGTAGGCTATCAGCTCTATATAAGGTTTTGCTATTCATTGAAAGC  
AGTAGTGACTGATTTGTATATA

>MinSyn\_1582|Strength:0.045494801  
GCGTGTCTGTTTTAGTGAGGAACCACGTCTACAAGTCTAGGAGGACCGATGCTATCGAAAGGACAGTA  
TGACTTGTGTAAGGTGGCTCCTACTATCAAAGATTGATGAAAAGTCAAAAACAAAATCAATTATC  
CGATGCTGATCTTGCTGCCTTGATGATAATGAGCTAAGCACATACGTCAGCTGGCTATATAAGGTTT  
TGCTATTCATTGAAAGCAGTAGTGACTGATTTGTATATA

>MinSyn\_1767|Strength:0.045549509  
GCGTGTCTGTTTTAGTGAGGTTATGACCCCGCCGATGACGCGGGACTGATCTTATGAGCTAAGCACAT  
ACGTCAGTCTTGCTGCCTTGATGATCCATCAACAAATAATCCAAGTAAGGTTTTCAACAACCTCTGG  
AAAAAGAAGAGGTGGTAGGTCAATTGCGATAAAGGAAAGGGTAGGCTATCAGCTTACTATATAAGGTT  
TTGCTATTCATTGAAAGCAGTAGTGACTGATTTGTATATA

>MinSyn\_1085|Strength:0.045650172  
GCGTGTCTGTTTTAGTGAGGGGAAAAAGAAGAGGTGCTAGGAGGACCGATGACGTAAGCCATGACGTCT  
ATATGCCCAATTAGGTTGTCATGAGCTAAGCACATACGTCAGTTAGCAAGACAACCACGTCTACAACC  
TCACATGTAGGAAAAATGTCAAAGATACTGCACCTCACATGCAGTGGTCCCTCCACTAGGAGGACCGA  
TCTATATAAGGTTTTGCTATTCATTGAAAGCAGTAGTGACTGATTTGTATATA

>MinSyn\_1605|Strength:0.045811199  
GCGTGTCTGTTTTAGTGAGGGGAAAAAGAAGAGGTAGGACCGATGAAGATAAGATAATAATGTTGAAGA  
TAAGACCTCTACAAAACCTGGTCAGTGGTCCCTCCACAGGATCCTTACCGCTATGGGTAAGATTATTAG  
GTTGTCTGATGACGTAAGCCATGACGTCTAAAGACAGCAAGTGGATACCGATGCTATATAAGGTTTTGCT  
CTATTCATTGAAAGCAGTAGTGACTGATTTGTATATA

>MinSyn\_1253|Strength:0.045880972  
GCGTGTCTGTTTTAGTGAGGAAGATTGATGAAAAGTCAAAAACAAAATCAATTATCTAGGAGGACCGA  
TGCTGATCTTGCCATCGAAAGGACAGTACTGATCTTGCCCTGCCTTGAATGAGCTAAGCACATACGTCA  
GTAGGTTGTCTGCAAACCATTATTGCGACAAAACCTGGTACTTGTGTACAGGCTATATAAGGTTTTGCT  
ATTCATTGAAAGCAGTAGTGACTGATTTGTATATA

>MinSyn\_1740|Strength:0.046086879  
GCGTGTCTGTTTTAGTGAGGTTTTCAACAACGACATTGCGATAAAGGAAAGGCCTCACATGTAGGCTA  
AAGATTGATGAAAAGTCAAAAACAAAATCAATTATCTCACATGACGTAAGCCATGACGTCTAGGTCA  
CGACCACTATGCCCAATTAGGAAAAAGAAGAGGTTTTGTCTGCACCTCACATCTATATAAGGTTTTGCT  
ATTCATTGAAAGCAGTAGTGACTGATTTGTATATA

>MinSyn\_1063|Strength:0.046194565  
GCGTGTCTGTTTTAGTGAGGATCCTTACCGCTATGGGTAAGATTTACATGTAGGCTATCAGCTTAGCA  
AGACCTTATGACCCCGCCGATGACGCGGGAATCTTGCCCTGACGTAAGGGATGACGCACATTGTGTA  
CAGGGCTCACTGCGCACACCAGCATGTGTTGATCACCAGCTCTGCACCTCACTATATAAGGTTTTGCT  
ATTCATTGAAAGCAGTAGTGACTGATTTGTATATA

>MinSyn\_1548|Strength:0.046282293  
GCGTGTCTGTTTTAGTGAGGAGCAAGTGGATGGTACTTGTGTACAGTCACTATCAGCACTGGTACTAAA  
AATGTCAAAGATAGCTTAGCAAGACCTCTACTCAGAAGATCAAAGGGCTACTTGTGTACAGGGCTCAC

TGCATGAGCTAAGCACATACGTCAGTAGGCTATCAGCTTAGCAAGACCCTATATAAGGTTTTGCTATT  
CATTGAAAGCAGTAGTGACTGATTTGTATATA  
>MinSyn\_1193|Strength:0.046791942  
GCGTGTTCGTTTTAGTGAGGCAGCCACTTGTGTTGCCTGCCTTGATGAGCTAAGCACATACGTCAGCTG  
CACCTCACATGTAGGCTATCAGCTTTTCAACAAGAGGACCGATAACCATTATTGCGATGCCCAATTAG  
GTTGTCTGCACCTCAATGACGTAAGCCATGACGTCTACATGTAGGCCAAATATTTCTTGTTGCACCTC  
ACATGTAGGCTATCAGCTTAGCTCACTATCAGCTGCCCAATTAGGTTGTCTGCACCTCACTTATGACC  
CCCGCCGATGACGCGGAGATCTTGCTGCCTTGATGAATTGCGATAAAGGAAAGGCACTGCTAGGAG  
GACCGATGCTGATCTCTATATAAGGTTTTGCTATTCATTGAAAGCAGTAGTGACTGATTTGTATATA  
>MinSyn\_1830|Strength:0.04735734  
GCGTGTTCGTTTTAGTGAGGAATTTCCGGAAACCTCCTCGTCGCGGTAGGTCACGACCACTACAGTGGT  
CCCTCCACCACTGCTAGGAGGACCTCAGAAGATCAAAGGGCTAACAGGGCTCACTGCCAGCCACTTGT  
GTGCGGTAGGTCACGACATGAGCTAAGCACATACGTCAGAATTACTATATAAGGTTTTGCTATTCATT  
GAAAGCAGTAGTGACTGATTTGTATATA  
>MinSyn\_1047|Strength:0.04762969  
GCGTGTTCGTTTTAGTGAGGAATTTCCGGAAACCTCCTCGACTGGTACTTGTGTACAGGGCTCACTGCT  
AAACCATTATTGCGTGCCTGCCAACCACGTCTACAATCACGACCACTATGCCCAATTACTGACGTAAG  
GGATGACGCACAACCTTGTGTACAGGGCTTTTTCAACAACCTTGCTATATAAGGTTTTGCTATTCATTGA  
AAGCAGTAGTGACTGATTTGTATATA  
>MinSyn\_1520|Strength:0.047672452  
GCGTGTTCGTTTTAGTGAGGGGAAAAGAAGAGTCTCTACAAAACCTGGTACTTGTGTACAGCCACTT  
GTGTTATGCCCAATTTGAAGATAAGATAATAATGTTGAAGATAAGACGGTAGGTCACGACCACTGACG  
TAAGGGATGACGCACAAAACCTGGTACTTGTGAAGCATCTTCCACTATATAAGGTTTTGCTATTCATTG  
AAAGCAGTAGTGACTGATTTGTATATA  
>MinSyn\_1208|Strength:0.047701997  
GCGTGTTCGTTTTAGTGAGGAACCACGTCTACAAGCTTAGCAATGAGCTAAGCACATACGTCAGATCTC  
TCTGCCGACAGTGGTCCCAAATTGATGATACAAATATTTCTTGCTCCTCCATCAACAAATAATCCAAGT  
AAGAGCAGCCACTTGTGTGGGCTCACTGCTAGGAGGACCGATGCTCTATATAAGGTTTTGCTATTCAT  
TGAAAGCAGTAGTGACTGATTTGTATATA  
>MinSyn\_1935|Strength:0.048057973  
GCGTGTTCGTTTTAGTGAGTTTTTCAACAAAAGACCTCTACAAAACCTGGTACTTAGCAAGTGGATTGCT  
CAGTGGTCCCTCCACCTGCTAGGATCCTTACCGCTATGGGTAAGATTCATCGAAAGGACAGTAGGTTG  
TCTGCACCTCACATGTAAGGATGACGTAAGGATGACGCACAAGCTATATAAGGTTTTGCTATTCATTGAA  
AGCAGTAGTGACTGATTTGTATATA  
>MinSyn\_1580|Strength:0.048207255  
GCGTGTTCGTTTTAGTGAGGATGACGTAAGCCATGACGTCTAGCTAGGAAGGTGGCTCCTACAATTAGG  
TTGTGAGAAGATCAAAGGGCTATCTACAAAACCTGGTACTTGTGTACAGGGCTATATAAGGTTTTGCTA  
TTCATTGAAAGCAGTAGTGACTGATTTGTATATA  
>MinSyn\_1639|Strength:0.048459816  
GCGTGTTCGTTTTAGTGAGGTGAAGATAAGATAATAATGTTGAAGATAAGATATGCCCAATTAGGTTGT  
CTGCACGTGGGAGCCACCATCACGACCACTATGCCCAATTAGGTGAAGCATCTTCCGACCACTATATG  
ACGTAAGCCATGACGTCTAATCTTGCTGCCTTGATGACTATATAAGGTTTTGCTATTCATTGAAAGC  
AGTAGTGACTGATTTGTATATA  
>MinSyn\_1965|Strength:0.048975389  
GCGTGTTCGTTTTAGTGAGGGGAAAAGAAGAGGTAAGACCTCTACAAAACCTCCATCAACAAATAATC  
CAAGTAAGGGTTGTCTATGAGCTAAGCACATACGTCAGACCAGCCACTTGTGTTAGCAAGTGGTGGAG  
CACGACACAATTAGGTTGTCTGCACCTCACATGTAGGCTATATAAGGTTTTGCTATTCATTGAAAGCA  
GTAGTGACTGATTTGTATATA  
>MinSyn\_1103|Strength:0.049011637  
GCGTGTTCGTTTTAGTGAGGATGACGTAAGCCATGACGTCTACTACAAATGGTGGAGCACGACAGCTTA  
GCGCACACCAGCATGTGTTGATCACCAGCTAGGAGGACCGATGCTGATCCTATATAAGGTTTTGCTAT  
TCATTGAAAGCAGTAGTGACTGATTTGTATATA  
>MinSyn\_1374|Strength:0.049039178  
GCGTGTTCGTTTTAGTGAGGTCATCAGCGGTCAATGACGTAAGCCATGACGTCTATCAGCTTAGCA

AGACGCACACCAGCATGTGTTGATCACCAGCTGAGGACCGATGCTGATCTTGCCTCTATATAAGGTTT  
TGCTATTCATTGAAAGCAGTAGTACTGATTTGTATATA

>MinSyn\_1043|Strength:0.049100844

GCGTGTTCGTTTTAGTGAGGCAGCCACTTGTGTACATGTAGGCTATCAGGCACACCAGCATGTGTTGA  
TCACCAGCTACATGTAGGCTATCAGCTTAGCATGAGCTAAGCACATACGTCAGTATCAGCTTAGCAAG  
AAACCATTATTGCGCATGTAGGCTATCAGCTTAGCCTATATAAGGTTTTGCTATTCATTGAAAGCAGT  
AGTACTGATTTGTATATA

>MinSyn\_1697|Strength:0.049368436

GCGTGTTCGTTTTAGTGAGGTTTTCAACAACCTGTGGGAGCCACCAACCTCACATTCAGAAGATCAAAGG  
GCTATTGTCTGCACCTCACATGTATCACTATCAGCGGAGGACCGATGCTGATCTTGCCTGACGTAAGG  
GATGACGCACAGCTAGGAGGACCGATGCTGATCCTATATAAGGTTTTGCTATTCATTGAAAGCAGTAG  
TGACTGATTTGTATATA

>MinSyn\_1651|Strength:0.049699898

GCGTGTTCGTTTTAGTGAGGAAAAATGTCAAAGATAGACCGATGCTGATCTTGCCTGCATTGCGATAAA  
GGAAAGGCAGCTTAGCAAGACCTCTACAAAACCTATCCTTACCGCTATGGGTAAGATTTGCTAATGAGC  
TAAGCACATACGTCAGCTGCTAGGAGGACCGATCTATATAAGGTTTTGCTATTCATTGAAAGCAGTAG  
TGACTGATTTGTATATA

>MinSyn\_1869|Strength:0.049778946

GCGTGTTCGTTTTAGTGAGGCTGACGTAAGGGATGACGCACATAGGTTGTCTGCACCTCACATGTAGTC  
ACTATCAGCTTGTACTCTCTCTGCCGACAGTGGTCCCAAACCTCTACAATGACGTAAGCCATGACG  
TCTACCACTATGCCCAATTAGGTTGTCTGCACCTAACACGTCTACAAGCGGTAGGTCACGACCACTA  
TGCCCAAATATTTCTTGTAGCAAGACCTCTACAAAACCTGAAGCATCTTCCAGGACCGATGCTGAT  
CTTGCCTGCTATATAAGGTTTTGCTATTCATTGAAAGCAGTAGTGACTGATTTGTATATA

>MinSyn\_1782|Strength:0.049899858

GCGTGTTCGTTTTAGTGAGGCAGCCACTTGTGTACTCTACTGAAGCATCTTCCCTTAGCAAGACCTCT  
ACATGAAGATAAGATAATAATGTTGAAGATAAGACTATGCCCAATTAGGTTATGACGTAAGCCATGAC  
GTCTAAGGCTTCAGAAGATCAAAGGGCTAACAGCTATATAAGGTTTTGCTATTCATTGAAAGCAGTAG  
TGACTGATTTGTATATA

>MinSyn\_1619|Strength:0.050130635

GCGTGTTCGTTTTAGTGAGGATGAGCTAAGCACATACGTCAGATTAGGTTGTCTGCACCTCACATTTTT  
CAACAACCACTATGCCCAATTAGGTTGTCTGCACCCAAATATTTCTTGTGCAAGACCTCTACAAAAC  
ATCGAAAGGACAGTATGCCCAATTAGGTTGTCTATATAAGGTTTTGCTATTCATTGAAAGCAGTAGTG  
ACTGATTTGTATATA

>MinSyn\_1811|Strength:0.050188618

GCGTGTTCGTTTTAGTGAGGTTATGACCCCGCCGATGACGCGGGAACCACTATGCCCAATTAGGTAGG  
TGGCTCCTACACTATGATGACGTAAGCCATGACGTCTAGATGCTGATCTTGCCTGAACCATTATTGCG  
GTAGGCTATCAGCTTAGCAAGACCTCTACACTATATAAGGTTTTGCTATTCATTGAAAGCAGTAGTGA  
CTGATTTGTATATA

>MinSyn\_1011|Strength:0.050455516

GCGTGTTCGTTTTAGTGAGGCAGTGGTCCCTCCACTGATCTTGCCTGCCTTGATGAATGAGCTAAGCAC  
ATACGTCAGTGCTAGGAGGACCGATGCTGATCTTGCCTGAAGATTGATGAAAAGTCAAAAACAAAAT  
CAATTATAGGACCGATGCTGATCTTGCCTGCTATATAAGGTTTTGCTATTCATTGAAAGCAGTAGTGA  
CTGATTTGTATATA

>MinSyn\_1846|Strength:0.050741623

GCGTGTTCGTTTTAGTGAGGTTTTCAACAACCTGGTACTTGTGTACAGGGCTCACAAATATTTCTTGTTA  
GGTTGTCTGCACCTCAACCACGTCTACAACCTACATGACGTAAGCCATGACGTCTAGTTGTTCTCTC  
TGCCGACAGTGGTCCCAAATACAGGGCTCCTATATAAGGTTTTGCTATTCATTGAAAGCAGTAGTGAC  
TGATTTGTATATA

>MinSyn\_1049|Strength:0.050789693

GCGTGTTCGTTTTAGTGAGGATCCTTACCGCTATGGGTAAGATTATGGTGGAGCACGACACGACCACTA  
TGCCCAATTAGAGGTGGCTCCTACCTCTATGAGCTAAGCACATACGTCAGGGTAGGTCACGACCACTA  
TAACCATTATTGCGGGAGGACCGATGCTCTATATAAGGTTTTGCTATTCATTGAAAGCAGTAGTGACT  
GATTTGTATATA

>MinSyn\_1229|Strength:0.050810391

GCGTGTCTGTTTTAGTGAGGAGGTGGCTCCTACGCAAGACCTCTACAAAACCTGGTACTTGGCACACCAG  
CATGTGTTGATCACCAGCTACAAAAAATGTCAAAGATATGCACCTCACATGTAGGCCTGACGTAA  
GGGATGACGCACAACCTGGTACTTGTGTACTATATAAGGTTTTGCTATTTCATTGAAAGCAGTAGTGACT  
GATTTGTATATA

>MinSyn\_1778|Strength:0.050812244

GCGTGTCTGTTTTAGTGAGGAGGTGGCTCCTACGCAAGACCTCTACAAAACCTGGTACTTGGCACACCAG  
CACATACGTCAGGCTCACTGAAAAATGTCAAAGATAAGCAAGACTGGTGGAGCACGACAGACCTCTAC  
AAAACCTGGTACTGGAAAAAGAAGAGGTGCCTATATAAGGTTTTGCTATTTCATTGAAAGCAGTAGTGAC  
TGATTTGTATATA

>MinSyn\_1056|Strength:0.051147946

GCGTGTCTGTTTTAGTGAGGTTTTCAACAAACCGATGCTGATCTTGCCTGCCTTGCTTTGTCAAAGCT  
AAAAAAGATGATGCAGGTCACGACCACTATGCCCAATTAGGGGAAAAAGAAGAGGTAATGACGTAAGC  
CATGACGTCTAATGCCCAATTAGGTCTATATAAGGTTTTGCTATTTCATTGAAAGCAGTAGTGACTGAT  
TTGTATATA

>MinSyn\_1241|Strength:0.051335041

GCGTGTCTGTTTTAGTGAGGAGCAAGTGGATCATGTAGGCTATCAGCCAAATATTTCTTGTTCTGCACA  
GCCACTTGTGTCATCCTTACCGCTATGGGTAAGATTTGTACAGGGCTCACTGCTACTGACGTAAGGGA  
TGACGCACACAAGACCTCTACAAAACCTATATAAGGTTTTGCTATTTCATTGAAAGCAGTAGTGACTGA  
TTTGTATATA

>MinSyn\_1937|Strength:0.052045891

GCGTGTCTGTTTTAGTGAGGTGAAGCATCTTCTACAAAACCTGGTACTTGTGTACAGGTGAAGATAAGA  
TAATAATGTTGAAGATAAGACTTAGCATGACGTAAGCCATGACGTCTACTATGGAAAAAGAAGAGGTA  
CTGCTAGGAGGACCGATGCTGATCTATATAAGGTTTTGCTATTTCATTGAAAGCAGTAGTGACTGATTT  
GTATATA

>MinSyn\_1831|Strength:0.052197764

GCGTGTCTGTTTTAGTGAGGTCCATCAACAAATAATCCAAGTAAGACTGCTAGGAGGACCGATGCTGAT  
CTATGAGCTAAGCACATACGTCAGACATGTAGGCTATGTGGGAGCCACCAACTGCTAGGAGGACCGAT  
TTTCAACAACTCACTGCTAGGACTATATAAGGTTTTGCTATTTCATTGAAAGCAGTAGTGACTGATTTG  
TATATA

>MinSyn\_1698|Strength:0.052354216

GCGTGTCTGTTTTAGTGAGGAACCATTATTGCGAGGAGGACCGATGCTGATCTTAGCAAGTGGATGGGC  
TCACTGCTAATGAGCTAAGCACATACGTCAGAGCCTGACGTAAGGGATGACGCACACGGTAGGTACG  
ACCACTATGCCCTTTTCAACAAGCATTGCGATAAAGGAAAGGGTAGGTCTATATAAGGTTTTGCTAT  
TCATTGAAAGCAGTAGTGACTGATTTGTATATA

>MinSyn\_1982|Strength:0.05270437

GCGTGTCTGTTTTAGTGAGGATTGCGATAAAGGAAAGGACTGGTACTTGTGTACAGGGCTCACTGCTTT  
TCAACAACCAATATTTCTTGTTCCCAATTAGGTTGTCTGCACCTCACATGTGAAGCATCTTCCACTGA  
CGTAAGGGATGACGCACAGCCTATATAAGGTTTTGCTATTTCATTGAAAGCAGTAGTGACTGATTTGTA  
TATA

>MinSyn\_1377|Strength:0.052716759

GCGTGTCTGTTTTAGTGAGGTGAAGCATCTTCTGATCTTGTTTTTCAACAACCTGAGCACACCAGCATGT  
GTTGATCACCAGCTACCTCACATGTAGGCTATCAGCTCTGACGTAAGGGATGACGCACATATGCCCAA  
TTAGGTTGTCTGCACCTCACTATATAAGGTTTTGCTATTTCATTGAAAGCAGTAGTGACTGATTTGTAT  
ATA

>MinSyn\_1178|Strength:0.052783996

GCGTGTCTGTTTTAGTGAGGGAAAAAGAAGAGGTCTCACATGTAGGCTATCAGCTTGTGGGAGCCACC  
AACATGAGCTAAGCACATACGTCAGGGTTGTCTGCACCTCACACAAATATTTCTTGTTGTCTGCAC  
CTCACATGTAGGCTATCAGCTATATAAGGTTTTGCTATTTCATTGAAAGCAGTAGTGACTGATTTGTAT  
ATA

>MinSyn\_1101|Strength:0.053164342

GCGTGTCTGTTTTAGTGAGGGAAAAAGAAGAGGTTAGGCTATCAAACCACGTCTACAAACCGATGCTG  
ATCTTGCCTGCCTTGATAATTTCCGGAAACCTCCTCGGTCTGCACCTCTGACGTAAGGGATGACGCAC  
ATGCTAGGAGGACCGATGCTATATAAGGTTTTGCTATTTCATTGAAAGCAGTAGTGACTGATTTGTATA  
TA

>MinSyn\_1286|Strength:0.053267457  
GCGTGTTCGTTTTAGTGAGGCAGCCACTTGTGTTACACGCAAATATTTCTTGTCTGCATCCTTACCGCTA  
TGGGTAAGATTACTTGTGTACAGGGCTCACTGCTAGGAGATGACGTAAGCCATGACGTCTATAGGTTG  
AAGCATCTTCCTCTACAACCTATATAAGGTTTTGCTATTCATTGAAAGCAGTAGTGACTGATTTGTATA  
TA

>MinSyn\_1327|Strength:0.053671707  
GCGTGTTCGTTTTAGTGAGGATGAGCTAAGCACATACGTCAGCGCGGTAGGTCACGACCAGCAAGTGGG  
TTTTAGCAAGACCTCTTTATGACCCCGCCGATGACGCGGGAAGGCTATCAGCTTAGTGGGAGCCACCA  
CTCACTGCTAGGAGGACCTATATAAGGTTTTGCTATTCATTGAAAGCAGTAGTGACTGATTTGTATAT  
A

>MinSyn\_1295|Strength:0.053763351  
GCGTGTTCGTTTTAGTGAGGATCCTTACCGCTATGGGTAAGATTA AAACTGGTACTTGTGTAGCAAGTG  
GATCCTGCCTTGA AACACGTCTACA ACTTGATGAATGACGTAAGCCATGACGTCTAGTCACGACCAC  
TATGCCCAATTAGGCTATATAAGGTTTTGCTATTCATTGAAAGCAGTAGTGACTGATTTGTATATA

>MinSyn\_1370|Strength:0.053847528  
GCGTGTTCGTTTTAGTGAGGATGAGCTAAGCACATACGTCAGCTGGTACTTGTGTACAGGGCTCACTGC  
TAAACCATTATTGCGACTATGCCCAATTAGGTTGTCTCTGACGTAAGGGATGACGCACAGGCTCACTG  
TCCATCAACAAATAATCCAAGTAAGGCAAGAAACCACGTCTACAATTGCCTTGAAGATAAGATAATAA  
TGTTGAAGATAAGATCACGACCCAAATATTTCTTGTCACTATATAAGGTTTTGCTATTCATTGAAAGC  
AGTAGTGACTGATTTGTATATA

>MinSyn\_1452|Strength:0.053867002  
GCGTGTTCGTTTTAGTGAGGTGAAGATAAGATAATAATGTTGAAGATAAGAACTATGCCCAATTAGGTT  
GTCTGCACTGGTGGAGCACGACATTGCCTGCCTATGACGTAAGCCATGACGTCTAGGTCACGACCCT  
ATGCCCAATTAGGTTCTATATAAGGTTTTGCTATTCATTGAAAGCAGTAGTGACTGATTTGTATATA

>MinSyn\_1959|Strength:0.05397967  
GCGTGTTCGTTTTAGTGAGGAACCATTATTGCGCGATGCTGATGAGCTAAGCACATACGTCAGGTA  
GTGTACAGTCTCTCTGCCGACAGTGGTCCCAAAGGTAGGTCACGACCAAGGTGGCTCCTACTCGCGGT  
AGGTCACGACCACTATCTATATAAGGTTTTGCTATTCATTGAAAGCAGTAGTGACTGATTTGTATATA

>MinSyn\_1012|Strength:0.054010338  
GCGTGTTCGTTTTAGTGAGGCTGACGTAAGGGATGACGCACACCACTATGCCCAATTAGGTTGTCTGCA  
CAACCATTATTGCGAGGCTATCAGCTTAGCAAGACCTCCTATATAAGGTTTTGCTATTCATTGAAAGC  
AGTAGTGACTGATTTGTATATA

>MinSyn\_1536|Strength:0.054104345  
GCGTGTTCGTTTTAGTGAGGGCACACCAGCATGTGTTGATCACCAGCTCCACAAGATTGATGAAAAGTC  
AAAAACAAAATCAATTATTTCTCTCTGCCGACAGTGGTCCCAAAGTAGGCAGTGGTCCCTCCACTGT  
GTACACAAATATTTCTTGTACTTGTGTACAGGGCTTTTCAACAAGCTGACGTAAGGGATGACGCACAA  
ATTAGGTTATGACGTAAGCCATGACGTCTAACTTGTGTACAGGGCTCACTGCTAGGAGAGCAAGTGGG  
TTGGTACTTGTGTACAGCTATATAAGGTTTTGCTATTCATTGAAAGCAGTAGTGACTGATTTGTATAT  
A

>MinSyn\_1752|Strength:0.054240596  
GCGTGTTCGTTTTAGTGAGGTGGTGGAGCACGACACTATGCCCAATTAGGTTGTCTGCACCTATGAGCT  
AAGCACATACGTCAGGACCACTATGCCCAATTAGGTTGTCTCGAAAAAGAAGAGGTGGTACTTGTGTAC  
AGGGCTCACTGCTCTATATAAGGTTTTGCTATTCATTGAAAGCAGTAGTGACTGATTTGTATATA

>MinSyn\_1708|Strength:0.054523992  
GCGTGTTCGTTTTAGTGAGGCTGACGTAAGGGATGACGCACAGCTAGGAGGACCGATGCTGATCTTGCC  
TCACTATCAGCTATCAGCTTAGCAAGACCTCTACAACTATATAAGGTTTTGCTATTCATTGAAAGCA  
GTAGTGACTGATTTGTATATA

>MinSyn\_1762|Strength:0.05456669  
GCGTGTTCGTTTTAGTGAGGCAAATATTTCTTGTGTATGAGCTAAGCACATACGTCAGGGTTCTCTCT  
GCCGACAGTGGTCCCAAAGCTTAGCATTTCACAAACAAAACCTGGTACTTGTGTACAGGGGGAAAA  
AGAAGAGGTCTATGCTATATAAGGTTTTGCTATTCATTGAAAGCAGTAGTGACTGATTTGTATATA

>MinSyn\_1812|Strength:0.054746863  
GCGTGTTCGTTTTAGTGAGGTCCATCAACAAATAATCCAAGTAAGCCTCACATGTAGCAGTGGTCCCTC  
CACGCCTGATGACGTAAGCCATGACGTCTATGCTGATCTTGCTGCCTTCTCTCTGCCGACAGTGGTC

CCAAATGATCTTGCTATATAAGGTTTTGCTATTCATTGAAAGCAGTAGTGACTGATTTGTATATA  
>MinSyn\_1688|Strength:0.054748649  
GCGTGTCTGTTTTAGTGAGGTTTTCAACAAACCGCAAATATTTCTTGTGCAGTGGTCCCTCCACCTGCT  
AGGAGGACCATGACGTAAGCCATGACGCTACCAATTAGGTTGTCTGGGAAAAAGAAGAGGTTATCAG  
CTTAGCAAGACCCTATATAAGGTTTTGCTATTCATTGAAAGCAGTAGTGACTGATTTGTATATA  
>MinSyn\_1631|Strength:0.054784057  
GCGTGTCTGTTTTAGTGAGGCAAATATTTCTTGTACTGCTAGGAGGACCGATGCTAACCACGTCTACAA  
AAACAATTTTCGGGAAACCTCCTCGGACCACTATGCCAATTAGGATGAGCTAAGCACATACGTCAGCT  
CACTGCTAGGAGCTATATAAGGTTTTGCTATTCATTGAAAGCAGTAGTGACTGATTTGTATATA  
>MinSyn\_1073|Strength:0.054796805  
GCGTGTCTGTTTTAGTGAGGCAAATATTTCTTGTATGGTGGAGCACGACAGGCTCACTGCTAGGAGGAC  
CGATATGAGCTAAGCACATACGTCAGGACATCGAAAGGACAGTACAATTAGGTTGTCTGCACCTCACA  
TGTATGACGTAAGCCATGACGCTAAACTGGTACTTGTGTAATTTTCGGGAAACCTCCTCGACTGGTAC  
TTGTGTACAGGATTGCGATAAAGGAAAGGGCCCAATAAAAATGTCAAAGATAGGTACTTGAGGTGGCT  
CCTACCCTATATAAGGTTTTGCTATTCATTGAAAGCAGTAGTGACTGATTTGTATATA  
>MinSyn\_1575|Strength:0.054811898  
GCGTGTCTGTTTTAGTGAGGATTGCGATAAAGGAAAGGTCTTGCCTGCATGACGTAAGCCATGACGTCT  
AGCTGGTGGAGCACGACATAGCAAGACCTCTACAAAAGTGGTACTAACCACGTCTACAAAACAAATATT  
TCTTGTATGCCAATTATGAGCTAAGCACATACGTCAGCAATTAGGTTGTCTGCACCTCACATTCTCT  
CTGCCGACAGTGGTCCCAAAGCTATCAGCTTAGCAAGACCAATTTTCGGGAAACCTCCTCGTCAGCTTA  
GCAAGACCTCTACAAAAGTGGGAAAAAGAAGAGGTTGCACCTCACATGTAGGCTCTATATAAGGTTTT  
GCTATTCATTGAAAGCAGTAGTGACTGATTTGTATATA  
>MinSyn\_1916|Strength:0.054906116  
GCGTGTCTGTTTTAGTGAGGCGAGTGGTCCCTCCACCTGCCTAACCATTATTGCGTACAGGGCTCACTGC  
TAGGAGGATCGAAAGGACAGTAAGGCTATCAGATGACGTAAGCCATGACGTCTAATGTAGGCTATCAG  
CTTAGCAAGACCTATATAAGGTTTTGCTATTCATTGAAAGCAGTAGTGACTGATTTGTATATA  
>MinSyn\_1800|Strength:0.055130407  
GCGTGTCTGTTTTAGTGAGGTTTTCAACAAGTTGTCTGCACCTCACATGTATGGTGGAGCACGACATCT  
GCACCTCACATCCTTACCGCTATGGGTAAGATTATGATATGAGCTAAGCACATACGTCAGAGACCTCT  
ACAAAAGTGGTCTATATAAGGTTTTGCTATTCATTGAAAGCAGTAGTGACTGATTTGTATATA  
>MinSyn\_1824|Strength:0.055325315  
GCGTGTCTGTTTTAGTGAGGGGAAAAAGAAGAGGTTACAAAAGTGGTACTTGTGTACAGGGCTCAATGA  
CGTAAGCCATGACGCTAGCTCACTGCTAGGAGGTTATGACCCCGCCGATGACGCGGGATTAGCAAG  
TGGATACAAACCTATATAAGGTTTTGCTATTCATTGAAAGCAGTAGTGACTGATTTGTATATA  
>MinSyn\_1216|Strength:0.055531738  
GCGTGTCTGTTTTAGTGAGGTTTTCAACAAAAGACCTCTACAAAAGTGGTACTTGTGTACAGGGCTCAATGA  
GGGAACAAAAGTGGTACTTGTGTACATCACTATCAGCTCTACAAATGACGTAAGCCATGACGCTACT  
ATGCCAATCTATATAAGGTTTTGCTATTCATTGAAAGCAGTAGTGACTGATTTGTATATA  
>MinSyn\_1512|Strength:0.056327692  
GCGTGTCTGTTTTAGTGAGGTCCATCAACAAATAATCCAAGTAAGCACTGCTAGGAGGACCGATGCATG  
AGCTAAGCACATACGTCAGTGCACCTCACAGGTGGCTCCTACACCAAATATTTCTTGTAGGTTGTC  
TGCACCTCTATATAAGGTTTTGCTATTCATTGAAAGCAGTAGTGACTGATTTGTATATA  
>MinSyn\_1827|Strength:0.057051082  
GCGTGTCTGTTTTAGTGAGGATGACGTAAGCCATGACGCTAAGCTTAGCAAGACCTTTTCAACAAGGA  
CCTCTCTGCGGACAGTGGTCCCAAACCTCTACCTATATAAGGTTTTGCTATTCATTGAAAGCAGTA  
GTGACTGATTTGTATATA  
>MinSyn\_1338|Strength:0.057923647  
GCGTGTCTGTTTTAGTGAGGTGAAGCATCTCCCTGCTTTGTCAAAGCTAAAAAGATGATGCCAAAA  
CTGGTCTCTGCGGACAGTGGTCCCAAACCTGCCTTGATGAATGAGCTAAGCACATACGTCAGCCTC  
TCTATATAAGGTTTTGCTATTCATTGAAAGCAGTAGTGACTGATTTGTATATA  
>MinSyn\_1633|Strength:0.059095224  
GCGTGTCTGTTTTAGTGAGGGGAAAAAGAAGAGGTTGCCTTGATTGAGAAGATCAAAGGGCTATGCACC  
TCACATGCTGACGTAAGGGATGACGCACAAGGCTATCAGCTTAGCAGCAAGTGGATTCACTGCTCTAT  
ATAAGGTTTTGCTATTCATTGAAAGCAGTAGTGACTGATTTGTATATA

>MinSyn\_1367|Strength:0.059201853  
GCGTGTTCGTTTTAGTGAGGATTGCGATAAAGGAAAGGACTGGTACTTGTGTACAATCCTTACCGCTAT  
GGGTAAGATTCCAATTAGGTTGTCTGCACCTCATGAGCTAAGCACATACGTCAGGACCTCTACAATA  
TATAAGTTTTGCTATTCATTGAAAGCAGTAGTGACTGATTTGTATATA

>MinSyn\_1691|Strength:0.059757227  
GCGTGTTCGTTTTAGTGAGGATCGAAAGGACAGTATGATCTTGCCTGCCTTAAAAATGTCAAAGATAGT  
ACTTGTGTACAGGGCTCACTCTGACGTAAGGGATGACGCACAAGCCAGCCACTTGTGTGTACACTATA  
TAAGTTTTGCTATTCATTGAAAGCAGTAGTGACTGATTTGTATATA

>MinSyn\_1864|Strength:0.060126627  
GCGTGTTCGTTTTAGTGAGGTGAAGATAAGATAAATAATGTTGAAGATAAGAAGGAGGACCGATGTGGTG  
GAGCACGACAAGCAAGACCTCTACAAAAGTGGTACTATGACGTAAGCCATGACGTCTACTCACTATAT  
AAGTTTTGCTATTCATTGAAAGCAGTAGTGACTGATTTGTATATA

>MinSyn\_1176|Strength:0.060278119  
GCGTGTTCGTTTTAGTGAGGAATTTCCGGAAACCTCCTCGAGACCTCTACAAAAGCAAGTGGATGCTGA  
TCTTGCCTGCCTTGATGAAACCACGTCTACAAGCCTTATGACGTAAGCCATGACGTCTAAGCTATATA  
AGGTTTTGCTATTCATTGAAAGCAGTAGTGACTGATTTGTATATA

>MinSyn\_1224|Strength:0.061166366  
GCGTGTTCGTTTTAGTGAGGCAGCCACTTGTGTCCAATTAGGTTGTCTGCACCATGACGTAAGCCATGA  
CGTCTACTCACTGCTAGGAGGACCTCTCTCTGCCGACAGTGGTCCCAAAGCTTAGCAAGCTATATAAG  
GTTTTGCTATTCATTGAAAGCAGTAGTGACTGATTTGTATATA

>MinSyn\_1375|Strength:0.061540366  
GCGTGTTCGTTTTAGTGAGGAGGTGGCTCCTACTCACTGCTAGGAGGACCGATGTGAAGCATCTTCCGG  
TCGCTTTGTCAAAGCTAAAAAAGATGATGCCTATGAGCTAAGCACATACGTCAGGCCTATATAAGGT  
TTTGCTATTCATTGAAAGCAGTAGTGACTGATTTGTATATA

>MinSyn\_1238|Strength:0.06180761  
GCGTGTTCGTTTTAGTGAGGAGCAAGTGGATAAAAAGTGGTACTTGTGTACAGGGCTAACCACGTCTACA  
ATCTATCTCTCTGCCGACAGTGGTCCCAAAGCTATCAGCTTAGCAAGACCTCTACATCAGAAGATCAA  
AGGGCTACTATTGCGATAAAGGAAAGGTTGTCTGCACCTCACATGGTGGGAGCCACCACAAAAGTGGT  
ACTTGTGTACAGGGCTCATGACGTAAGCCATGACGTCTACCAATTAGGTTGTCTGCACCTCACCTGAC  
GTAAGGGATGACGCACAAAAGTGGGCACACCAGCATGTGTTGATCACCAGCTGATCTTGCCTGCCTTGA  
TGACTATATAAGTTTTGCTATTCATTGAAAGCAGTAGTGACTGATTTGTATATA

>MinSyn\_1207|Strength:0.062742407  
GCGTGTTCGTTTTAGTGAGGTCTCTCTGCCGACAGTGGTCCCAAAGTGGTACTTGTGTACAGGGCT  
CACTGATGAGCTAAGCACATACGTCAGCCGATGCTGATCTTGCCTGCCTTGCCTGATCTATATAAGGTTTTG  
CTATTCATTGAAAGCAGTAGTGACTGATTTGTATATA

>MinSyn\_1803|Strength:0.062827629  
GCGTGTTCGTTTTAGTGAGGTTATGACCCCCGCCGATGACGCGGGATTGCCTGCCTTATGACGTAAGCC  
ATGACGTCTAACTTGTGTACAGGGCTCAGGAAAAGAAGAGGACTGCTAGGAGCTATATAAGGTTTT  
GCTATTCATTGAAAGCAGTAGTGACTGATTTGTATATA

>MinSyn\_1562|Strength:0.063200827  
GCGTGTTCGTTTTAGTGAGGCTGACGTAAGGGATGACGCACATAGGCTATCATTATGACCCCCGCCGAT  
GACGCGGGACGATGCTGATCTTGCCTGCCAACCACGTCTACAATTAGGTTGTCTGCACCTCATGACGT  
AAGCCATGACGTCTACCAATTAGGTTGTTTTCAACAAATGTAGGCTATCATCAGAAGATCAAAGGGCT  
ATACAGGGCTCACTGCTAGGAGGATTGCGATAAAGGAAAGGGTCTGCACCTCACATGTAGGCTCTATA  
TAAGGTTTTGCTATTCATTGAAAGCAGTAGTGACTGATTTGTATATA

>MinSyn\_1036|Strength:0.06327588  
GCGTGTTCGTTTTAGTGAGGAACCACGTCTACAACAAGACCTGACGTAAGGGATGACGCACACTGATCT  
TGCCTGATCCTTACCGCTATGGGTAAGATTCTCTACAAAAGTGGTACTTGTGTCTATATAAGGTTTTG  
CTATTCATTGAAAGCAGTAGTGACTGATTTGTATATA

>MinSyn\_1618|Strength:0.063541768  
GCGTGTTCGTTTTAGTGAGGGCACACCAGCATGTGTTGATCACCAGCTCTGATCTTGCCTGCCTTCTGA  
CGTAAGGGATGACGCACATACAGGGCTCAACCATTATTGCGTACAGGGCTCACTATATAAGGTTTTG  
TATTCATTGAAAGCAGTAGTGACTGATTTGTATATA

>MinSyn\_1761|Strength:0.063678396

GCGTGTCTGTTTTAGTGAGGGCACACCAGCATGTGTTGATCACCAGCTCCTCTACAAAAATTGCGATAA  
AGGAAAGGGGTCACGACCACTATGCCCTGACGTAAGGGATGACGCACAGCACCTATATAAGGTTTTGC  
TATTCATTGAAAGCAGTAGTGACTGATTTGTATATA

>MinSyn\_1330|Strength:0.06389896

GCGTGTCTGTTTTAGTGAGGCAAATATTTCTTGTGCCTGCCTTAAGATTGATGAAAAGTCAAAAACAAA  
AATCAATTATATTAGGATGACGTAAGCCATGACGTCTAGTCAAACCACGTCTACAAGATGCTGATGAG  
CTAAGCACATACGTCAGCTTTTTCAACAAGAGCACACCAGCATGTGTTGATCACCAGCTCACTATGGG  
AAAAAGAAGAGGTCTCTACAACCTATATAAGGTTTTGCTATTCATTGAAAGCAGTAGTGACTGATTTGT  
ATATA

>MinSyn\_1467|Strength:0.064227164

GCGTGTCTGTTTTAGTGAGGATCCTTACCGCTATGGGTAAGATTTGTCTGCATGAAGCATCTTCCGGTA  
CTTGTGTACAGGGCTCACTGCTAGCTGACGTAAGGGATGACGCACACTAGCTATATAAGGTTTTGCTA  
TTCATTGAAAGCAGTAGTGACTGATTTGTATATA

>MinSyn\_1287|Strength:0.064876152

GCGTGTCTGTTTTAGTGAGGAAAAATGTCAAAGATAACTATGCCCAATTAGGTTGTCTGCACCTCAATG  
AGCTAAGCACATACGTCAGTGCTAGGAGGACCGATGCTGATCTTGCCCTATATAAGGTTTTGCTATTC  
ATTGAAAGCAGTAGTGACTGATTTGTATATA

>MinSyn\_1081|Strength:0.064877495

GCGTGTCTGTTTTAGTGAGGAGGTGGCTCCTACCACTGCTAGGAGGACCGATGCGCACACCAGCATGTG  
TTGATCACCAGCTGGTACTTGTGTACCTGACGTAAGGGATGACGCACACCTATATAAGGTTTTGCTAT  
TCATTGAAAGCAGTAGTGACTGATTTGTATATA

>MinSyn\_1755|Strength:0.06499653

GCGTGTCTGTTTTAGTGAGGTTTTCAACAAGGACAAATATTTCTTGTGCTGCCTTGATGATAGCAAG  
TGGATTGATCTTTCAGAAGATCAAAGGGCTAGGTCACGACCACTATGCCCAAGCACACCAGCATGTGT  
TGATCACCAGCTTACAGGGCTCACTGCTAGATGAGCTAAGCACATACGTCAGCTGATCTTGCCTGCCT  
TGATGCTGACGTAAGGGATGACGCACACAAGACCTCTACAAATCACTATCAGCTTCCATCAACAAATA  
ATCCAAGTAAGAGCTATATAAGGTTTTGCTATTCATTGAAAGCAGTAGTGACTGATTTGTATATA

>MinSyn\_1844|Strength:0.065012808

GCGTGTCTGTTTTAGTGAGGAACCATTATTGCGGCTTAGCAAGACCTCTACAAAAATGAGCTAAGCACA  
TACGTCAGGACCGATGTCAGAAGATCAAAGGGCTACACTGCTAGGAGGCTATATAAGGTTTTGCTATT  
CATTGAAAGCAGTAGTGACTGATTTGTATATA

>MinSyn\_1859|Strength:0.065200022

GCGTGTCTGTTTTAGTGAGGTCCTATCAGCACATCTGACGTAAGGGATGACGCACATAATGACGTAAG  
CCATGACGTCTAGGTCACGACTCAGAAGATCAAAGGGCTATCGCGGTAGGTCACGACCACTATATCGA  
AAGGACAGTAGCCTGTGGTGGAGCACGACAATGCTGATCTTGCATCCTTACCGCTATGGGTAAGATTA  
GGTTGTCTGCACCTCACATGTGGGAGCCACCAGTGTACAGGGCACACCAGCATGTGTTGATCACCAGC  
TCTATCAGCTTAGCAAGACCTCTATATAAGGTTTTGCTATTCATTGAAAGCAGTAGTGACTGATTTGT  
ATATA

>MinSyn\_1737|Strength:0.065325978

GCGTGTCTGTTTTAGTGAGGTTTTCAACAAGGTAAGTACTTGTGTACAGGGCTCACTGCTCAGCCACTTGTGT  
TATGCCCAATTAGGTTGTCTGCACCTCACATGAGCTAAGCACATACGTCAGCTACAAAATGGTACTT  
GTGTACAGGGCATGACGTAAGCCATGACGTCTACCTGACGTAAGGGATGACGCACAGCTGATCTTGCC  
ATTGCGATAAAGGAAAGGTACAAAATGGTACTTTCCATCAACAAATAATCCAAGTAAGCGGTAGGTC  
TGGTGGAGCACGACACAATTACTATATAAGGTTTTGCTATTCATTGAAAGCAGTAGTGACTGATTTGT  
ATATA

>MinSyn\_1906|Strength:0.065600057

GCGTGTCTGTTTTAGTGAGGAGGTGGCTCCTACTCGCGGTAGGTCATTATGACCCCCGCCGATGACGCG  
GGAACCGATCTGACGTAAGGGATGACGCACATGCCTGCCTTGATGATCTATATAAGGTTTTGCTATTC  
ATTGAAAGCAGTAGTGACTGATTTGTATATA

>MinSyn\_1757|Strength:0.065708603

GCGTGTCTGTTTTAGTGAGGGGAAAAAGAAGAGGTAAGTACTTGTGGTGGAGCACGACACTGCTAA  
GCAAGTGGATGCTATCAGCCTGACGTAAGGGATGACGCACACTAGGCTATATAAGGTTTTGCTATTC  
TTGAAAGCAGTAGTGACTGATTTGTATATA

>MinSyn\_1514|Strength:0.065858846



GCGTGTCTGTTTTAGTGAGGTCCTATCAGCCCTGAAGATTGATGAAAAGTCAAAAACAAAAATCAATT  
ATATCATGAGCTAAGCACATACGTCAGCGCGGTGAGCCACTTGTGTACCTATATAAGGTTTTGCTATT  
CATTGAAAGCAGTAGTGACTGATTTGTATATA  
>MinSyn\_1260|Strength:0.065903815  
GCGTGTCTGTTTTAGTGAGGTCAGAAGATCAAAGGGCTAATCTTGCCTGCCTTGAATTTTCGGGAAACC  
TCCTCGGGTAGGTCTGACGTAAGGGATGACGCACAAGGCTATCAGCCTATATAAGGTTTTGCTATTCA  
TTGAAAGCAGTAGTGACTGATTTGTATATA  
>MinSyn\_1004|Strength:0.066136525  
GCGTGTCTGTTTTAGTGAGGTGGTGGAGCACGACATGGTACTTGTGTACAGGGCTCACTATGAGCTAAG  
CACATACGTCAGCAAAAATGTCAAAGATACACCTCACATGTAGGCCTATATAAGGTTTTGCTATTCAT  
TGAAAGCAGTAGTGACTGATTTGTATATA  
>MinSyn\_1748|Strength:0.066337952  
GCGTGTCTGTTTTAGTGAGGATGAGCTAAGCACATACGTCAGTTGCCTGAGGTGGCTCCTACCGACGCA  
CACCAGCATGTGTTGATCACCAGCTTCTGCACCTCACATGTAGGCTCTATATAAGGTTTTGCTATTCA  
TTGAAAGCAGTAGTGACTGATTTGTATATA  
>MinSyn\_1152|Strength:0.067812143  
GCGTGTCTGTTTTAGTGAGTTTTTCAACAACGGTAGGTACGACCCTGACGTAAGGGATGACGCACATT  
CAGAAGATCAAAGGGCTAACAGGGCTCACTGCTAGGAGGACCTATATAAGGTTTTGCTATTCATTGAA  
AGCAGTAGTGACTGATTTGTATATA  
>MinSyn\_1675|Strength:0.068105943  
GCGTGTCTGTTTTAGTGAGGATCGAAAGGACAGTACCATGACGTAAGCCATGACGTCTACGGTAGGTCA  
CCAGCCACTTGTGTCTGAGGTGGCTCCTACCACGACCACTACTATATAAGGTTTTGCTATTCATTGAA  
AGCAGTAGTGACTGATTTGTATATA  
>MinSyn\_1395|Strength:0.068111186  
GCGTGTCTGTTTTAGTGAGGAACCATTATTGCGCCAATTAGGTTGTCTGCACCTCACATGTAGCTGACG  
TAAGGGATGACGCACAACCTCTACAAAACCTGGTACTTGTCTATATAAGGTTTTGCTATTCATTGAAAG  
CAGTAGTGACTGATTTGTATATA  
>MinSyn\_1810|Strength:0.068286478  
GCGTGTCTGTTTTAGTGAGGTCCATCAACAAATAATCCAAGTAAGATGTAGGCTATCAGCTTAGCAAGA  
CCTCTGTGGGAGCCACCATAACAGGGCTCACCAATATTTCTTGTCTGCACCTCACATGTAGGCTATCA  
CTGACGTAAGGGATGACGCACAACCACTATGCCCAATTAGGTTGTCTTATGACCCCCGCCGATGACGC  
GGGAGTACTTGTGTACAGGATGACGTAAGCCATGACGTCTACAATTAGTTGTCTGCGCTTTGTCAA  
AAGCTAAAAAAGATGATGCCTGATCAGAAGATCAAAGGGCTAGCTTAGCAAGACCTCTACAAATTGCG  
ATAAAGGAAAGGTGCACCTCTATATAAGGTTTTGCTATTCATTGAAAGCAGTAGTGACTGATTTGTAT  
ATA  
>MinSyn\_1500|Strength:0.068543444  
GCGTGTCTGTTTTAGTGAGGAACCATTATTGCGGGGCTCACTGCAGCAAGTGGATTGCCAATTAGATG  
AGCTAAGCACATACGTCAGGGCTCACTGCTAGGAGGACCTATATAAGGTTTTGCTATTCATTGAAAGC  
AGTAGTGACTGATTTGTATATA  
>MinSyn\_1750|Strength:0.068597126  
GCGTGTCTGTTTTAGTGAGGCAAATATTTCTTGTCTTGTGGTGGAGCACGACACAGGGCTCACATGACG  
TAAGCCATGACGTCTATGCTAGGAGGACCGATGCTGATCCTATATAAGGTTTTGCTATTCATTGAAAG  
CAGTAGTGACTGATTTGTATATA  
>MinSyn\_1394|Strength:0.069087006  
GCGTGTCTGTTTTAGTGAGGAATTTTCGGGAAACCTCCTCGCACGACCACTATGCATGACGTAAGCCATG  
ACGTCTATGCACCTCACATGTAGGCTATCAGCTTAGCCTATATAAGGTTTTGCTATTCATTGAAAGCA  
GTAGTGACTGATTTGTATATA  
>MinSyn\_1154|Strength:0.069399162  
GCGTGTCTGTTTTAGTGAGGTCCTATCAGCGTCACGACCACTAGCAAGTGGATCTACAAAACCTGGTAC  
TTGTGTACCTGACGTAAGGGATGACGCACATCGCGGCTATATAAGGTTTTGCTATTCATTGAAAGCAG  
TAGTGACTGATTTGTATATA  
>MinSyn\_1031|Strength:0.070789853  
GCGTGTCTGTTTTAGTGAGGTGAAGCATCTCCCAATTAGGTTGTCTGCACATGACGTAAGCCATGAC  
GTCTATTGTCTGCACCTCACATGTAGGCTATCACTATATAAGGTTTTGCTATTCATTGAAAGCAGTAG

TGACTGATTTGTATATA  
>MinSyn\_1018|Strength:0.070991503  
GCGTGTCTGTTTTAGTGAGGCTGACGTAAGGGATGACGCACATAGGTTGTCTGCACCTCACATGTATTT  
TCAACAATAGTTGTCTGCACCTCACATGTAGGCTATATAAGGTTTTGCTATTCATTGAAAGCAGTAG  
TGACTGATTTGTATATA  
>MinSyn\_1779|Strength:0.07107987  
GCGTGTCTGTTTTAGTGAGGGCACACCAGCATGTGTTGATCACCAGCTTTGTGTACAGGGCTCACTGCT  
AGGATGACGTAAGCCATGACGTCTATGCCTGCCTCTATATAAGGTTTTGCTATTCATTGAAAGCAGTA  
GTGACTGATTTGTATATA  
>MinSyn\_1833|Strength:0.071149981  
GCGTGTCTGTTTTAGTGAGGATGACGTAAGCCATGACGTCTACTCACTGCTAGGAGGACCGATGCTGAT  
AACCACGTCTACAACTATGCCCAATTAGTTGTCTGCACCCTGACGTAAGGGATGACGCACACTAGG  
AGGACCGATGCTGATCTTGCCTGCAAAATTTCTTGTCTGCTGCACCTCACATGTATCACTATCAGC  
CACTGCTAGCTATATAAGGTTTTGCTATTCATTGAAAGCAGTAGTGACTGATTTGTATATA  
>MinSyn\_1098|Strength:0.071728758  
GCGTGTCTGTTTTAGTGAGGATGACGTAAGCCATGACGTCTACAGGGCAGGTGGCTCCTACCCTCACAT  
GTAGGCTAAATTTTCGGAAACCTCCTCGGAGGACTATATAAGGTTTTGCTATTCATTGAAAGCAGTAG  
TGACTGATTTGTATATA  
>MinSyn\_1276|Strength:0.071778609  
GCGTGTCTGTTTTAGTGAGGAACCACGTCTACAAGGAGGACCGATGCTGATCGTTTTGTCAAAGCTAA  
AAAAGATGATGCCGATGCTGATCTTATGACGTAAGCCATGACGTCTACGCGGTAGGTTGAAGCATCTT  
CCTAGTTGTCTGCACCTCACCTGACGTAAGGGATGACGCACAAGTTATGACCCCGCCGATGACGCG  
GGAGCTAGGAGGACCGATGCTGATCTTGTCACTATCAGCACCGATGCTGATCTATATAAGGTTTTGCT  
ATTCATTGAAAGCAGTAGTGACTGATTTGTATATA  
>MinSyn\_1057|Strength:0.07197451  
GCGTGTCTGTTTTAGTGAGGCTGACGTAAGGGATGACGCACACAAGTCTCTCTGCCGACAGTGGTCCCA  
AAACAAAAATGTCAAAGATAACAAAACCTGGTACCTATATAAGGTTTTGCTATTCATTGAAAGCAGTAG  
TGACTGATTTGTATATA  
>MinSyn\_1961|Strength:0.072025166  
GCGTGTCTGTTTTAGTGAGGATGAGCTAAGCACATACGTCAGGGTAGGTCACGACCACTATGCCCAATT  
AGGAACCATTATTGCGGACCACTATGCCCACTATATAAGGTTTTGCTATTCATTGAAAGCAGTAGTG  
ACTGATTTGTATATA  
>MinSyn\_1696|Strength:0.073162552  
GCGTGTCTGTTTTAGTGAGGAACCACGTCTACAACTTGTGTACAGGGCTCACTGCTAGGGCTTTGTCA  
AAAGCTAAAAAAGATGATGCCCTTGATCTGACGTAAGGGATGACGCACACTTGTGTACATCTCTCTGC  
CGACAGTGGTCCCAAAATGCTAGGTGGCTCCTACAGTTGTCTGCACCATGAGCTAAGCACATACGTC  
AGACCTCACATGTAGGCTATCAGCTTAGCAGGAAAAAGAAGAGTTGTACAGGGCTCACTGTCCATCA  
ACAAATAATCCAAGTAAGGGTACTTGTGTACAGGCTATATAAGGTTTTGCTATTCATTGAAAGCAGTA  
GTGACTGATTTGTATATA  
>MinSyn\_1091|Strength:0.074300133  
GCGTGTCTGTTTTAGTGAGGTCATATCAGCGCTCAAACCATTATTGCGGTAGGTCACGACCACTATGC  
CCGCACACCAGCATGTGTTGATCACCAGCTTACGCTTAGCAAGACCTCTACTTATGACCCCGCCGAT  
GACGCGGACTACAAAACCTGGTACTTGTGTACAGGCTGACGTAAGGGATGACGCACAGTTGTCTTCCA  
TCAACAAATAATCCAAGTAAGATTAGTTGTCTGCAATGACGTAAGCCATGACGTCTACACGACCACT  
ATGGGAAAAAGAAGAGGTATGTAGGCTATCAGCTTAGCAAGACAGCCACTTGTGTCTATCCTATATAA  
GGTTTTGCTATTCATTGAAAGCAGTAGTGACTGATTTGTATATA  
>MinSyn\_1206|Strength:0.074336735  
GCGTGTCTGTTTTAGTGAGGATCCTTACCGCTATGGGTAAGATTATCTTGCCTGCCTGACGTAAGGGAT  
GACGCACAGTGACAGGGCTCACTGCTCTATATAAGGTTTTGCTATTCATTGAAAGCAGTAGTGACTG  
ATTTGTATATA  
>MinSyn\_1082|Strength:0.074496599  
GCGTGTCTGTTTTAGTGAGGATGAGCTAAGCACATACGTCAGACCACTATGCCCAATTAGGTTGAAAA  
AGAAGAGGTGTACGTGGGAGCCACCACTATATAAGGTTTTGCTATTCATTGAAAGCAGTAGTGACTG  
ATTTGTATATA

>MinSyn\_1494|Strength:0.074816292  
GCGTGTTCGTTTTAGTGAGGAGCAAGTGGATCCTCTACAAAAGTGGTACTCCATCAACAAATAATCCAA  
GTAAGCGCGGTAGGTCACGACCACTATGCCTCTCTCTGCCGACAGTGGTCCCAAACATGTAGGCTAT  
CAGCTTAGCAAGACCTCTCAGAAGATCAAAGGGCTACTGCTTTGTCAAAGCTAAAAAAGATGATGCC  
CACTATGCCCAAGTGGGAGCCACCAAAATGACGTAAGCCATGACGTCTACGACCACTATGCCCAATTA  
GGTTGCTGACGTAAGGGATGACGCACATCTGCACCTCACATGTCTATATAAGGTTTTGCTATTCATTG  
AAAGCAGTAGTGACTGATTTGTATATA

>MinSyn\_1362|Strength:0.075070345  
GCGTGTTCGTTTTAGTGAGGATGAGCTAAGCACATACGTCAGAGGAGGACCGATGCTGATCTTGCATCG  
AAAGGACAGTAGGTAGGTCACGACCCTATATAAGGTTTTGCTATTCATTGAAAGCAGTAGTGACTGAT  
TTGTATATA

>MinSyn\_1240|Strength:0.076126761  
GCGTGTTCGTTTTAGTGAGGGCTTTGTCAAAGCTAAAAAGATGATGCACTGGTAATGACGTAAGCCA  
TGACGTCTATAGCAAGACCTCTCTATATAAGGTTTTGCTATTCATTGAAAGCAGTAGTGACTGATTTG  
TATATA

>MinSyn\_1866|Strength:0.076279371  
GCGTGTTCGTTTTAGTGAGGAAGATTGATGAAAAGTCAAAAACAAAAATCAATTATTGCACCTCACAAA  
AATGTCAAAGATACTCTACAAAACCTTGGTGGAGCACGACACCTTCTCTCTGCCGACAGTGGTCCCAA  
TAGGCTATCAGCTTAGCAAGACCTCTGAAGATAAGATAATAATGTTGAAGATAAGACCTCTACAAAAC  
TGGTTCATCAACAAATAATCCAAGTAAGCACGTGGGAGCCACCACACTGACGTAAGGGATGACGCAC  
AACCCTATGCCCAATTAGGTTGTCTATGACGTAAGCCATGACGTCTAACTGGTACCTATATAAGGTT  
TTGCTATTCATTGAAAGCAGTAGTGACTGATTTGTATATA

>MinSyn\_1046|Strength:0.076679021  
GCGTGTTCGTTTTAGTGAGGATGAGCTAAGCACATACGTCAGTAGGATCGAAAGGACAGTAAAAAATG  
TCAAAGATATAGGAGGACCGATGCTATATAAGGTTTTGCTATTCATTGAAAGCAGTAGTGACTGATTT  
GTATATA

>MinSyn\_1716|Strength:0.078037269  
GCGTGTTCGTTTTAGTGAGGATTGCGATAAAGGAAAGGACGACCACTATGCCCAATTA AAAATGTCAA  
GATACGGTAGGTCAAACCATTATTGCGTTAGGTTGTCTGCACCTCACTGACGTAAGGGATGACGCACA  
GGAGGACCGATGCTGATCTTGCCCTGCCATGACGTAAGCCATGACGTCTAGCTCACTGCATCCTTACCG  
CTATGGGTAAGATTTAGCTTAGCAAGCTATATAAGGTTTTGCTATTCATTGAAAGCAGTAGTGACTG  
ATTTGTATATA

>MinSyn\_1705|Strength:0.078542802  
GCGTGTTCGTTTTAGTGAGGGCACACCAGCATGTGTTGATCACCAGCTTTGCCTGCCTTGATGAAAAAT  
GTCAAAGATACTCTACAAAAGTGGTACTTGTGTACAGGGCTCACTATCAGCACTATGCCAACCATTAT  
TGCGCTCACATGTAGTGAAGATAAGATAATAATGTTGAAGATAAGACGACCACTATGCCCAATTAGGT  
TGTCTAATTTGCGGAAACCTCCTCGCACATGTAGGCTATCAGCTATGACGTAAGCCATGACGTCTAGG  
TTGTCAACCACGTCTACAATCTGCACCTCACATGTAGATGAGCTAAGCACATACGTCAGAAACTGGTA  
CTTGTGTACAGGGCTCACCTATATAAGGTTTTGCTATTCATTGAAAGCAGTAGTGACTGATTTGTATA  
TA

>MinSyn\_1139|Strength:0.078804062  
GCGTGTTCGTTTTAGTGAGGATTGCGATAAAGGAAAGGGATGCTGATCTTGCCTGCCTTGATGAGCTAA  
GCACATACGTCAGTGACTGACGTAAGGGATGACGCACACAAGACCTCTACAAAAGTGGTACTCTATAT  
AAGGTTTTGCTATTCATTGAAAGCAGTAGTGACTGATTTGTATATA

>MinSyn\_1854|Strength:0.078810145  
GCGTGTTCGTTTTAGTGAGGAGGTGGCTCTACGTTGTCTGCACCTCATGAGCTAAGCACATACGTCAG  
AGCAAGACCTCTACAAAAGTATATAAGGTTTTGCTATTCATTGAAAGCAGTAGTGACTGATTTGTATA  
TA

>MinSyn\_1320|Strength:0.079385401  
GCGTGTTCGTTTTAGTGAGGATGAGCTAAGCACATACGTCAGTATGCCAATTAGGTTGTCTGCACCTC  
ACAACCATTATTGCGTACTATATAAGGTTTTGCTATTCATTGAAAGCAGTAGTGACTGATTTGTATAT  
A

>MinSyn\_1027|Strength:0.079454015  
GCGTGTTCGTTTTAGTGAGGACAGTGGTCCCTCCACATAATGACGTAAGCCATGACGTCTACGATGCTGA

TCTTGCCTGCCTTGATGCTATATAAGGTTTTGCTATTCATTGAAAGCAGTAGTGACTGATTTGTATATA

A

>MinSyn\_1589|Strength:0.079969118

GCGTGTTCGTTTTAGTGAGGTGAAGCATCTCCCTTGTGTACAATGACGTAAGCCATGACGTCTACTCT  
ACAAAACGGTACTTGCTATATAAGGTTTTGCTATTCATTGAAAGCAGTAGTGACTGATTTGTATATA

>MinSyn\_1228|Strength:0.080072794

GCGTGTTCGTTTTAGTGAGGAAAAATGTCAAAGATATGCCCACTGACGTAAGGGATGACGCACAGACCG  
ATGCTGATCTTGCCTGCTATATAAGGTTTTGCTATTCATTGAAAGCAGTAGTGACTGATTTGTATATA

>MinSyn\_1590|Strength:0.080418382

GCGTGTTCGTTTTAGTGAGGCTGACGTAAGGGATGACGCACAAATTTTCAACAATGCACCTCACATCGA  
AAGGACAGTATTGATGCTATATAAGGTTTTGCTATTCATTGAAAGCAGTAGTGACTGATTTGTATATA

>MinSyn\_1088|Strength:0.080561481

GCGTGTTCGTTTTAGTGAGGAGGTGGCTCCTACGTAAGGCTGACGTAAGGGATGACGCACAAATTTTCAACAATGCACCTCACATCGA  
CATACTGACGCTTGCCTGCTATATAAGGTTTTGCTATTCATTGAAAGCAGTAGTGACTGATTTGTATATA

>MinSyn\_1855|Strength:0.080974068

GCGTGTTCGTTTTAGTGAGGAGCAAGTGGATAATTAGGTATGAGCTAAGCACATACGTCAGCCCAATTA  
GGTTGTCTGCACCTCTGAAGCATCTCCAGTTGTCTGTCTCTCTGCCGACAGTGGTCCCAAATGGTA  
CTTGTGTACAGGGCTCAATGACGTAAGCCATGACGTCTAACCCTATGCCCAATTAGGTTGTCTGACG  
TAAGGGATGACGCACAGGTAAGGTTGTGTACAGGGCTAAGATTGATGAAAAGTCAAAAACAAAAATCAAT  
TATACCGATGCTGAGGTGGCTCCTACTAGGTTGTCTGCACCTCACATGTAGGCTGTGGGAGCCACCAC  
ACCTCACCTATATAAGGTTTTGCTATTCATTGAAAGCAGTAGTGACTGATTTGTATATA

>MinSyn\_1969|Strength:0.081162687

GCGTGTTCGTTTTAGTGAGGCTGACGTAAGGGATGACGCACACCGATGCTGATCTTGCCTAACCATTAT  
TGCGAAAACGGTACTATATAAGGTTTTGCTATTCATTGAAAGCAGTAGTGACTGATTTGTATATA

>MinSyn\_1341|Strength:0.081197761

GCGTGTTCGTTTTAGTGAGGCAAATATTTCTTGTTCGTTAGGTCACGACCACATGACGTAAGCCATGACG  
TCTAATCTTGCCTGCTATATAAGGTTTTGCTATTCATTGAAAGCAGTAGTGACTGATTTGTATATA

>MinSyn\_1028|Strength:0.081374051

GCGTGTTCGTTTTAGTGAGGCAAGTGGTCCCTCCACAACTGGTACTTGTGTACAGGGCTCATTATGACC  
CCC GCCGATGACGCGGGATCTGCACCTCACATGTAGGCTATCAGCTGACGTAAGGGATGACGCACAAC  
CTCTACAAAACGGTACTTGTGTAGCTTTGTCAAAGCTAAAAAGATGATGCCCAATTAGGTTGTCT  
GCAATGACGTAAGCCATGACGTCTAAAGACCTCTACAAAACGGTACTTGTGAGCAAGTGGATCACCT  
CACAAAAAATGTCAAAGATATCAGATCGAAAGGACAGTACGGTAGCTATATAAGGTTTTGCTATTCAT  
TGAAAGCAGTAGTGACTGATTTGTATATA

>MinSyn\_1278|Strength:0.083840769

GCGTGTTCGTTTTAGTGAGGATGACGTAAGCCATGACGTCTAAATTAGGTTATTGCGATAAAGGAAAGG  
TGTACAGGGCCTATATAAGGTTTTGCTATTCATTGAAAGCAGTAGTGACTGATTTGTATATA

>MinSyn\_1986|Strength:0.084381395

GCGTGTTCGTTTTAGTGAGGTGGTGGAGCACGACACCATGAGCTAAGCACATACGTCAGACGACCACTA  
TGCCCAATTCTATATAAGGTTTTGCTATTCATTGAAAGCAGTAGTGACTGATTTGTATATA

>MinSyn\_1308|Strength:0.085037447

GCGTGTTCGTTTTAGTGAGGAGGTGGCTCCTACTGGTACTTGTGTACAGGGCAGCCACTTGTGTGAGGA  
AGCAAGTGGATTAGCAAGACCTCTACAAAGATTGATGAAAAGTCAAAAACAAAAATCAATTATCTATG  
CCCAATTAGGTTGTCTGCACCTCATGAGCTAAGCACATACGTCAGACGATGGTGGAGCACGACACT  
ATGCCCAATTAGGTTGTCTGCACCCTGACGTAAGGGATGACGCACACACTATGCCCAATTATGACCCC  
CGCCGATGACGCGGGACCTCTACAAAACCTATATAAGGTTTTGCTATTCATTGAAAGCAGTAGTGACTG  
ATTTGTATATA

>MinSyn\_1299|Strength:0.086340054

GCGTGTTCGTTTTAGTGAGGGTGGGAGCCACCATGTGTACAGGGCTCACTGCTAGGAGCAGTGGTCCCT  
CCACGTCTGACGTAAGGGATGACGCACATGCACCTCACATGTAGGCTATATGAGCTAAGCACATACGT  
CAGTATTGCGATAAAGGAAAGGACAGGGCTCACTGCCTATATAAGGTTTTGCTATTCATTGAAAGCAG  
TAGTGACTGATTTGTATATA

>MinSyn\_1006|Strength:0.086969403

GCGTGTTCGTTTTAGTGAGGATGACGTAAGCCATGACGTCTATCCTGACGTAAGGGATGACGCACAGTA

CTTGTGTACAGGGCTCACTGCAAGATTGATGAAAAGTCAAAAACAAAATCAATTATTGCCTTGATGA  
AAAAATGTCAAAGATATCTACAAAAGTACTTGTGTAGGAAAAAGAAGAGGTCCCAATTAGTTGT  
CCTATATAAGGTTTTGCTATTCATTGAAAGCAGTAGTGACTGATTTGTATATA

>MinSyn\_1798|Strength:0.087032941

GCGTGTTCGTTTTAGTGAGGATGACGTAAGCCATGACGTCTACTTGCCTGCCTTGATGATTCATCA  
GCTGCACCTCACATGTAGGTGAAGATAAGATAATAATGTTGAAGATAAGACTTAGCAAGATGAGCTAA  
GCACATACGTCAGGTAAGTGTGTACAGGGCTCACTGCTAGGTGAAGCATCTCCGACCGATGCTGATC  
TTGCCTGCCTTGATGACTATATAAGGTTTTGCTATTCATTGAAAGCAGTAGTGACTGATTTGTATATA

>MinSyn\_1555|Strength:0.087773317

GCGTGTTCGTTTTAGTGAGGATGACGTAAGCCATGACGTCTACTTACAAAAGTACTTGTCTGAC  
GTAAGGGATGACGCACATGTCTGCACCTCACATGTAGGTTTTCAACAAGGAGGACCGATGCTGATCTT  
GTCCATCAACAATAATCCAAGTAAGGTGTACAGGCTTTGTCAAAGCTAAAAAGATGATGCAGACC  
TCTACTCAGAAGATCAAAGGGCTAGAGGACCGATGCTGATCTTGCCAACCATATTGCGGGTAGGTCA  
GGTGGCTCCTACGCTATCAGCTTAGCAAGACCTCTACACTATATAAGGTTTTGCTATTCATTGAAAGC  
AGTAGTGACTGATTTGTATATA

>MinSyn\_1799|Strength:0.088162903

GCGTGTTCGTTTTAGTGAGGTCCATCAACAATAATCCAAGTAAGGCTAGATGACGTAAGCCATGACGT  
CTAGCTATATAAGGTTTTGCTATTCATTGAAAGCAGTAGTGACTGATTTGTATATA

>MinSyn\_1422|Strength:0.089188931

GCGTGTTCGTTTTAGTGAGGATCCTTACCGCTATGGGTAAGATTCTGCTAGGAGGACCGATCACTATCA  
GCAAAAATTATGACCCCGCCGATGACGCGGGAGTCTGCACCTCAATGAGCTAAGCACATACGTCAGC  
TAAGATTGATGAAAAGTCAAAAACAAAATCAATTATTGGTACTTGTGTATGACGTAAGCCATGACGT  
CTATTTGAAGATAAGATAATAATGTTGAAGATAAGATTAGGTTGTCTGCACCTCACCTATATAAGGTT  
TTGCTATTCATTGAAAGCAGTAGTGACTGATTTGTATATA

>MinSyn\_1936|Strength:0.0908275

GCGTGTTCGTTTTAGTGAGGATTGCGATAAAGGAAAGGTGGTACTTATGACGTAAGCCATGACGTCTAG  
CTATATAAGGTTTTGCTATTCATTGAAAGCAGTAGTGACTGATTTGTATATA

>MinSyn\_1343|Strength:0.09132062

GCGTGTTCGTTTTAGTGAGGCTGACGTAAGGGATGACGCACACGCGGTAGGTCACGACCACTATGCCTC  
TCTCTGCCGACAGTGGTCCAAAAGTACTTGTGTACAGGGCTCACTGCAGCAAGTGGATGTGTAC  
AGGGCTCACTGCTAGGAGGACCGATGAGCTAAGCACATACGTCAGCAAGACCATCCTTACCGCTATGG  
GTAAGATTCAAGACCTCTACAAAAGTACTAAAATGTCAAAGATAACCTCTACAAAAGTCTATAT  
AAGGTTTTGCTATTCATTGAAAGCAGTAGTGACTGATTTGTATATA

>MinSyn\_1923|Strength:0.092955556

GCGTGTTCGTTTTAGTGAGGAGGTGGCTCCTACTTGCCTGATGAGCTAAGCACATACGTCAGGGGCCTA  
TATAAGGTTTTGCTATTCATTGAAAGCAGTAGTGACTGATTTGTATATA

>MinSyn\_1508|Strength:0.095582719

GCGTGTTCGTTTTAGTGAGGAAAAATGTCAAAGATAGCAAGACCTCTACAAAAGTGGTATGAAGATAAG  
ATAATAATGTTGAAGATAAGAGGCAGGTGGCTCCTACTATGAGCTAAGCACATACGTCAGATCACAGT  
GGTCCCTCCACGATAACCATTATTGCGTTGTGTACAGGGCTATGACGTAAGCCATGACGTCTATGCTG  
ATCTTGCCTGCCTTGTGGTGGAGCACGACAGGACCGATCTATATAAGGTTTTGCTATTCATTGAAAGC  
AGTAGTGACTGATTTGTATATA

>MinSyn\_1819|Strength:0.09604893

GCGTGTTCGTTTTAGTGAGGAAAAATGTCAAAGATATCGCGGTAGGTCACGACCAAAGATTGATGAAAA  
GTCAAAAACAAAATCAATTATATTAGGGCTTTGTCAAAGCTAAAAAGATGATGCGCTCACTGCTA  
GGAGTCACTATCAGCTGCCAATTCTGACGTAAGGGATGACGCACACATGTAGGCTATGAAGATAAGA  
TAATAATGTTGAAGATAAGATGCTAGGAGGACCGATGCTGATCTATGACGTAAGCCATGACGTCTATT  
GTCTGCACCTCACATGTAGGCTATCAGCTGGTGGAGCACGACAACTCTATATAAGGTTTTGCTATTC  
TTGAAAGCAGTAGTGACTGATTTGTATATA

>MinSyn\_1325|Strength:0.096907364

GCGTGTTCGTTTTAGTGAGGATGACGTAAGCCATGACGTCTAGTCTGCACCTCACATGTAGGCACACCA  
GCATGTGTTGATCACCAGCTCACATGTAGGCTATCAGCTTACTGACGTAAGGGATGACGCACATAGGT  
CACGACCACTATCAGCCACTTGTGTATCTTGCCTGCCTTGATGCTATATAAGGTTTTGCTATTCATTG  
AAAGCAGTAGTGACTGATTTGTATATA

>MinSyn\_1694|Strength:0.097166886  
GCGTGTGTTTTAGTGAGGTTATGACCCCCGCCGATGACGCGGGAGCCTGCCTTGATGAATCGAAAGG  
ACAGTATGATCTTTCGCGTGGGAGCCACCACACATGTAGGCTATCAGCTTAGCAAGACATGAGCTAAGCA  
CATACGTCAGTATCAGCTTAGCAAATGACGTAAGCCATGACGTCTACTGCTATATAAGGTTTTGCTAT  
TCATTGAAAGCAGTAGTGACTGATTTGTATATA

>MinSyn\_1506|Strength:0.097421955  
GCGTGTGTTTTAGTGAGGAGCAAGTGGATGGACCGATGCTGATCTTGCCTGTTATGACCCCCGCCGA  
TGACGCGGGATATGCCCAATTAGGTTGTCAAGATTGATGAAAAGTCAAAAACAAAATCAATTATTGT  
ACAGGGCTCACTGCTAGGAATGACGTAAGCCATGACGTCTAAGGACCGATGCTGATCTTTTCAACAAG  
CTTAGCAAGACCTCTACAAAAAATGTCAAAGATAGTTGTCTGCACCTCACATGTAGGCTATCCTGACG  
TAAGGGATGACGCACAATCAGCTCACTATCAGCTTCCATCAACAAATAATCCAAGTAAGTAGCAAGAC  
CTCTACAAAACCTGGTCTATATAAGGTTTTGCTATTTCATTGAAAGCAGTAGTGACTGATTTGTATATA

>MinSyn\_1119|Strength:0.101316857  
GCGTGTGTTTTAGTGAGGCTGACGTAAGGGATGACGCACAATGCTGATCTTGCCTGCCTTGATGAAT  
GAGCTAAGCACATACGTCAGGGGCTCACTGCAACCACGCTACAACCACTATGCCCAATTAGGTTGTT  
GAAGATAAGATAATAATGTTGAAGATAAGAAATCCTTACCGCTATGGGTAAGATTCTAAAAAATGTCA  
AAGATACGACCACTATGCCCAATTAGGTTGTCTCAAATATTTCTTGTAGGACCGATGCTGATCTTGCC  
TGCCCTATATAAGGTTTTGCTATTTCATTGAAAGCAGTAGTGACTGATTTGTATATA

>MinSyn\_1777|Strength:0.104911167  
GCGTGTGTTTTAGTGAGGGCACACCAGCATGTGTTGATCACCAGCTTGCACCTCACATGTAGGCTAT  
CAGCGCTTTGTCAAAGCTAAAAAAGATGATGCAGGCTATCAGCTTAGCAAGACAGCCACTTGTGTAC  
ATGTAGGCTATCAGCTATGAGCTAAGCACATACGTCAGCTGCTAGGAGGACCGATGCTGATCACTATC  
AGCACTATGCCCAATTAGGTTGTCTCTGACGTAAGGGATGACGCACAGATGCTGATCTTGCCTGCCT  
GATGCTATATAAGGTTTTGCTATTTCATTGAAAGCAGTAGTGACTGATTTGTATATA

>MinSyn\_1533|Strength:0.108015405  
GCGTGTGTTTTAGTGAGGTCTCTCTGCCGACAGTGGTCCCAAAGGTCACATGAGCTAAGCACATAC  
GTCAGACCTCTACAAAACCTGGTACTTGTGTACAGCTGACGTAAGGGATGACGCACAGATCTTGCCTGC  
CTTGATGACTATATAAGGTTTTGCTATTTCATTGAAAGCAGTAGTGACTGATTTGTATATA

>MinSyn\_1131|Strength:0.108118689  
GCGTGTGTTTTAGTGAGGCTGACGTAAGGGATGACGCACAGATCTTGCCTGCCTTGAATGACGTAAG  
CCATGACGTCTACACGCTTTGTCAAAGCTAAAAAAGATGATGCTACAGGGCTCACTGCTAAACCATT  
ATTGCGACAAAACCTGGTACTTGTGTACAGGGCGTGGGAGCCACCATACTTGTGTACATTTTCAACAAG  
CAAGACCTCTACAAAACCTATATAAGGTTTTGCTATTTCATTGAAAGCAGTAGTGACTGATTTGTATATA

>MinSyn\_1409|Strength:0.10842386  
GCGTGTGTTTTAGTGAGGATGACGTAAGCCATGACGTCTAATGCTGATCTTGCCTGCCTTGATGACA  
GCCACTTGTGTTAGCTTAGCAAGATCAGAAGATCAAAGGGCTACGCGGTAGGTCACGACCACTATGC  
CCAATTTCTCTCTGCCGACAGTGGTCCCAAATGATGATATCCATCAACAAATAATCCAAGTAAGCTCA  
CATGTAGCTGACGTAAGGGATGACGCACAATGCTAGCAAGTGGATCGGTAGGTCACGACCACTAACCA  
TTATTGCGGCAAGACCTCTACAAAACCTGGTACTTGTCACTATCAGCTCTATATAAGGTTTTGCTATTC  
ATTGAAAGCAGTAGTGACTGATTTGTATATA

>MinSyn\_1865|Strength:0.109941317  
GCGTGTGTTTTAGTGAGGTTTTCAACAACCTGCACCTCACATGTAGGCTATCAGCTTAGTCTCTCTGC  
CGACAGTGGTCCCAAAGCTTAGCAAAAAATGTCAAAGATAGACCGATGCTGATCTTGCCTGCCTTGC  
AGCCACTTGTGTTGCTGAAGGTGGCTCCTACTAATGACGTAAGCCATGACGTCTAGCCTGCCTTGATG  
ATGAAAAAGAAGAGGTGAGAATTTGCGGAAACCTCCTCGGGCTGACGTAAGGGATGACGCACAGACC  
GATGCTGATCCTATATAAGGTTTTGCTATTTCATTGAAAGCAGTAGTGACTGATTTGTATATA

>MinSyn\_1134|Strength:0.110884416  
GCGTGTGTTTTAGTGAGGATGACGTAAGCCATGACGTCTAAGGCTATCAGCTTAGCAAGACCTCTAC  
TGACGTAAGGGATGACGCACACTCTACAAAACCTGGTACTTGTGTACAGGGCCAGTGGTCCCTCCACGC  
TCACTGCTAGGAGGACCGATGTGGTGGAGCACGACAGGTTGTCTGCACCTCACACAAATATTTCTTGT  
CAGCTTAGCAAGACCTCTACAAAGTGGGAGCCACCATAGGCTATCAGCTATATAAGGTTTTGCTATTC  
ATTGAAAGCAGTAGTGACTGATTTGTATATA

>MinSyn\_1763|Strength:0.114324633  
GCGTGTGTTTTAGTGAGGGCTTTGTCAAAGCTAAAAAAGATGATGCCTACAAAACCTGGTACTTGTG

TACAGGGTGAAGATAAGATAATAATGTTGAAGATAAGAATGCCCAATTAGGTTGTCTGCACCCAGCCA  
CTTGTGTCCTCTACAAAAGTGGTACTTGTGTAATGACGTAAGCCATGACGTCTAGTACTTGTGTACAG  
GGCTAGGTGGCTCCTACGCCCAATTAGGTAACCACGTCTACAACACTGCTAGGAGGACCGATGCTGAT  
TGGTGGAGCACGACAAATTATGAGCTAAGCACATACGTCAGCCTCTAGTGGGAGCCACCATCGCGGTA  
GGTCACGACCACTATGCTATATAAGGTTTTGCTATTTCATTGAAAGCAGTAGTGACTGATTTGTATATA  
>MinSyn\_1390|Strength:0.115923226

GCGTGTGTTTTAGTGAGGTTTTCAACAAGCACCTCACATGTAGGCTCACTATCAGCCTCTACAAATG  
AGCTAAGCACATACGTCAGCCACTATGCCAAAACCATTATTGCGATCTTGCCTGCCATGACGTAAGC  
CATGACGTCTATGGTACTTGTGTACAGGGCTATATAAGGTTTTGCTATTTCATTGAAAGCAGTAGTGAC  
TGATTTGTATATA

>MinSyn\_1166|Strength:0.118586881

GCGTGTGTTTTAGTGAGGCAGCCACTTGTGTCTACAAAAGTGGTACTTGTGTATGAGCTAAGCACAT  
ACGTCAGACCACTATGCCCAATTAGGTTGTCTGCACCTCCATCAACAAATAATCCAAGTAAGCACGAC  
CACTATGCCCAATCAAAATATTTCTTGTTCGCGGTAGGTCACGACGCTTTGTCAAAGCTAAAAAGAT  
GATGCCCAATTAGGTTGTCTGCACCTCACGAAAAAGAAGAGGTTGTCTGCACCTCACATGTAGGCT  
ATGACGTAAGCCATGACGTCTATAGGTCACGACCACTATGCCCAATATCCTTACCGCTATGGGTAAGA  
TTTTGCCTGAACCACGTCTACAAGACCACTATGCCCAATTAGGTTCTATATAAGGTTTTGCTATTTCATT  
GAAAGCAGTAGTGACTGATTTGTATATA

>MinSyn\_1826|Strength:0.120565767

GCGTGTGTTTTAGTGAGGATTGCGATAAAGGAAAGGCACTGCTAGGAGGACCGATGCTGATCCTGAC  
GTAAGGGATGACGCACAGTCTGCACCTCACATGTAGGCTATCAGTGGGAGCCACCAGGTCACGACCAC  
TATGCTGAAGCATCTTCCGATCTATGACGTAAGCCATGACGTCTAACTAGGTGGCTCCTACCACTGCT  
AGGAGGACCGCTATATAAGGTTTTGCTATTTCATTGAAAGCAGTAGTGACTGATTTGTATATA

>MinSyn\_1996|Strength:0.121128935

GCGTGTGTTTTAGTGAGGTTATGACCCCCGCCGATGACGCGGGATAGGCTAACCACGTCTACAAGGC  
TATATGACGTAAGCCATGACGTCTACTCTACAAAAGTGGTACTTGTGTCGAAAGGACAGTATAGGCTAT  
CAGCTTAGCAAGACCTCTATGGTGGAGCACGACAGCCGATGCTGATCTTGCCTGCCTCAGCCACTTG  
TGTAGGGCTACAACCATTATTGCGTCTGCACCATGAGCTAAGCACATACGTCAGCCTCTACAAAAGT  
GGTATCCTTACCGCTATGGGTAAGATTTGTACAGGGCTCACTGCTAGGAGGACTATATAAGGTTTTGC  
TATTTCATTGAAAGCAGTAGTGACTGATTTGTATATA

>MinSyn\_1336|Strength:0.121219204

GCGTGTGTTTTAGTGAGGTCACCTATCAGCATGTAGGCTATCAGCTTAGCAGCCACTTGTGTTGGTAA  
TGAGCTAAGCACATACGTCAGTACTTGTGTACAGGGCTGGAAAAAGAAGAGGTGGCCTGACGTAAGGG  
ATGACGCACACGACCACTATGCCTATATAAGGTTTTGCTATTTCATTGAAAGCAGTAGTGACTGATTTG  
TATATA

>MinSyn\_1118|Strength:0.127615374

GCGTGTGTTTTAGTGAGGAATTTGCGGAAACCTCCTCGGATGCTGATCTTGCCTGCCTTGAATGAGC  
TAAGCACATACGTCAGGCTAGGAGGACCGATTTTTCAACAAGTCACGACCACTATGCCCAATATTTCT  
TTGTCACTGCTAGGAGGACCGATGCTCTCTGCGGACAGTGGTCCCAAAGCTAGGAGGACCGATGCT  
GATCTTGCATGACGTAAGCCATGACGTCTAGTCTGCACCTCACATGTAGGAAAAATGTCAAAGATAG  
CCCAATTAGGTTCTATATAAGGTTTTGCTATTTCATTGAAAGCAGTAGTGACTGATTTGTATATA

>MinSyn\_1279|Strength:0.129843222

GCGTGTGTTTTAGTGAGGGCACACCAGCATGTGTTGATCACCAGCTCTAGGAGGACCGATGCTGGTG  
GAGCACGACACAATTTGCGGAAACCTCCTCGTCAGAAAAATGTCAAAGATATAGCAAGACCATGAGCT  
AAGCACATACGTCAGTAGGAGGAATCCTTACCGCTATGGGTAAGATTGTAGGTCACGACCAAGGTGGC  
TCCTACATGCTGATCTTGTGACGTAAGCCATGACGTCTATGTACAGGGCTCCTATATAAGGTTTTGC  
TATTTCATTGAAAGCAGTAGTGACTGATTTGTATATA

>MinSyn\_1671|Strength:0.131230415

GCGTGTGTTTTAGTGAGGAAGATTGATGAAAAGTCAAAAACAAAATCAATTATATCTTGCCTATGA  
GCTAAGCACATACGTCAGCGCGGTAGGTCACGGCACACCAGCATGTGTTGATCACCAGCTGGTTGTCT  
GCACCTCACATGTAGGCAGCCACTTGTGTGATCTTGCCTGCCTTGTGATGACGTAAGCCATGACGTC  
TAACCTGTGGGAGCCACCAGCGGTAGGTCACGACCTATATAAGGTTTTGCTATTTCATTGAAAGCAGT  
AGTGACTGATTTGTATATA

>MinSyn\_1045|Strength:0.131618431

GCGTGTTCGTTTTAGTGAGGCTGACGTAAGGGATGACGCACAGGTAGGTCACGACCACTATGCCAATA  
TGACGTAAGCCATGACGTCTACCGAGCTTTGTCAAAGCTAAAAAGATGATGCTGATCTCTCTGCCG  
ACAGTGGTCCCAAAGACCACTATGCCAATTAGGTTGTCTGCACAACCACGTCTACAAGGTCACGACC  
TATATAAGTTTTGCTATTCATTGAAAGCAGTAGTGACTGATTTGTATATA

>MinSyn\_1700|Strength:0.131772013

GCGTGTTCGTTTTAGTGAGGATGACGTAAGCCATGACGTCTATACAGGGCTCACTGCTAGGAGGAAAA  
GAAGAGGTAAGACCTCTACAAAAGTGGTACTTAAAGATTGATGAAAAGTCAAAAACAAAATCAATTAT  
AACTGGTACTTGTGTACAGGGCTCACTTTATGACCCCGCCGATGACGCGGGACACTATGCCAATTA  
GGTTGTCTGCCTGACGTAAGGGATGACGCACACGATGCTGATCTTGTCCATCAACAAATAATCCAAG  
TAAGCTCACATGTAGGCTACTATATAAGGTTTTGCTATTCATTGAAAGCAGTAGTGACTGATTTGTAT  
ATA

>MinSyn\_1693|Strength:0.132226001

GCGTGTTCGTTTTAGTGAGGTTTTCAACAATGCCAATTAGGTTGTCTGCTTTGTCAAAGCTAAAAA  
GATGATGCTAGCAAGACCTCTACAAAAGTGGTGGAGCAGCAGCACCTCACATGTAGGCTTCTCT  
CTGCCGACAGTGGTCCCAAAGTTGTCTGCACCTCACATGTAGATGAGCTAAGCACATACGTCAGGTAG  
GCTATCAGCTTAGCGTGGGAGCCACCAACCTCACATGTAGGCTATCAGCTAACCATTATTGCGCTGGT  
ACTTGTGTACAGGGCTCACTGCTACAGTGGTCCCTCCACGCTGACTGACGTAAGGGATGACGCACACA  
GGGCTCACTGCTAGGAGGACCTATATAAGGTTTTGCTATTCATTGAAAGCAGTAGTGACTGATTTGTA  
TATA

>MinSyn\_1353|Strength:0.132596813

GCGTGTTCGTTTTAGTGAGGATGACGTAAGCCATGACGTCTATACAAAAGTGGTACTTGTGTACAGAAC  
CACGTCTACAAATGCTGATCTTGCTGCATGAGCTAAGCACATACGTCAGATCTGACGTAAGGGATGA  
CGCACATATCAGCAAGTGGATGGTAGGCTATATAAGGTTTTGCTATTCATTGAAAGCAGTAGTGACT  
GATTTGTATATA

>MinSyn\_1731|Strength:0.136219509

GCGTGTTCGTTTTAGTGAGGATGACGTAAGCCATGACGTCTAATTAGAAGATTGATGAAAAGTCAAAA  
CAAAAATCAATTATCCAATTAGGTTAGCAAGTGGATTTGTCTGCACCTCAATCCTTACCGCTATGGGT  
AAGATTACTACTATCAGCCCTCACATGTAGGCTATCAGCTTATGAGCTAAGCACATACGTCAGCTTGT  
GTACAGGGTGGTGGAGCAGCAGCACTGCTAGGAGCTATATAAGGTTTTGCTATTCATTGAAAGCAGTAG  
TGACTGATTTGTATATA

>MinSyn\_1461|Strength:0.136978696

GCGTGTTCGTTTTAGTGAGGTTCTCTGCGGACAGTGGTCCCAAAGGGCTCACTGCTAGGAGGACCGA  
TGCTTCCATCAACAAATAATCCAAGTAAGGCTATCAGCTTAGCAAGAATGACGTAAGCCATGACGTCT  
AGTAGGTCAGTGGTCCCTCCACAGGTCACGACCACTATGCCAATTAGGTTAGCAAGTGGATGTCAGC  
ACCACTATGCCAATTAGGATGAGCTAAGCACATACGTCAGGCTAGGAGGACCGATCTATATAAGGTT  
TTGCTATTCATTGAAAGCAGTAGTGACTGATTTGTATATA

>MinSyn\_1753|Strength:0.137154545

GCGTGTTCGTTTTAGTGAGGATGAGCTAAGCACATACGTCAGTCAATGACGTAAGCCATGACGTCTAGG  
ACCGATGCTGATCAACCAGTCTACAACTCACATGTAGGCTATCACTATATAAGGTTTTGCTATTCAT  
TGAAAGCAGTAGTGACTGATTTGTATATA

>MinSyn\_1861|Strength:0.138050657

GCGTGTTCGTTTTAGTGAGGAGGTGGCTCCTACGACCGATGCTGATCTTGTATGACCCCGCCGATGA  
CGCGGGATGCCTGCCTTGATGATAATGAGCTAAGCACATACGTCAGGGCTCACTGCTAGGAGGACCGA  
TGCTGATATCCTTACCGCTATGGGTAAGATTACGACCTGACGTAAGGGATGACGCACATAGGAGCTAT  
ATAAGGTTTTGCTATTCATTGAAAGCAGTAGTGACTGATTTGTATATA

>MinSyn\_1196|Strength:0.141176443

GCGTGTTCGTTTTAGTGAGGATGACGTAAGCCATGACGTCTACTCTACAAAAGTGGTACTTAGCAAGTG  
GATACAAAAGTGGTACTTGTGTACAGTTATGACCCCGCCGATGACGCGGGATGCCAATTAGGTTGT  
CTGCACCTTGAAGATAAGATAATAATGTTGAAGATAAGATCACGACCACTATGCAAAAATGTCAAAGA  
TACTCACTGCTAGGAGGACCGATGCTGATCTTTCAGAAGATCAAAGGGCTATGTCTGCTGACGTAAGG  
GATGACGCACATTGCCTGCCTATTGCGATAAAGGAAAGGGAGGACCGATGCTGATCTTGCCTGCCTTG  
ACTATATAAGGTTTTGCTATTCATTGAAAGCAGTAGTGACTGATTTGTATATA

>MinSyn\_1687|Strength:0.143993719

GCGTGTTCGTTTTAGTGAGGCTGACGTAAGGGATGACGCACACAGGGCTCACTGCTAGGGTGGGAGCCA



CCAAAACTGGTACTTGTGTACAGGGCTCAATCGAAAGGACAGTAAGGGCTCACTGCTAGGAGGACCC  
AGTGGTCCCTCCACTGCTAGGGGAAAAAGAAGAGGTAGACCTCTACAAAACCTGGTATCACTATCAGCA  
GGTTGTCTGCACCTACAATCCTTACCGCTATGGGTAAGATTTAGATGACGTAAGCCATGACGTCTAC  
ATGTAGGCTTGAAGCATCTTCCGAGGACCGATGCTGATCTTGCCTGCCTTCTATATAAGGTTTTGCTA  
TTCATTGAAAGCAGTAGTGACTGATTTGTATATA

>MinSyn\_1609|Strength:0.144450289

GCGTGTTCGTTTTAGTGAGGATGAGCTAAGCACATACGTCAGGTCACGACATGACGTAAGCCATGACGT  
CTACGGTAGGTCACAAAAATGTCAAAGATAGGTTGTCTGCACCTCACATGTAGCTATATAAGGTTTTG  
CTATTCATTGAAAGCAGTAGTGACTGATTTGTATATA

>MinSyn\_1818|Strength:0.147457228

GCGTGTTCGTTTTAGTGAGGTCATCAGCGCATGACGTAAGCCATGACGTCTATGGTACGCTTTGTC  
AAAAGCTAAAAAAGATGATGCCACCTCTGACGTAAGGGATGACGCACAATCTATATAAGGTTTTGCTA  
TTCATTGAAAGCAGTAGTGACTGATTTGTATATA

>MinSyn\_1801|Strength:0.147739797

GCGTGTTCGTTTTAGTGAGGTAAGCATCTTCCGGTTGTCTGCACCTCACATGTTGGTGGAGCACGACA  
GACCACTATGCCAATCTGACGTAAGGGATGACGCACAGGTTGTCTGCATTATGACCCCGCCGATGA  
CGCGGGAGGCTCACTGCTAGGAGGACCGATGCATGACGTAAGCCATGACGTCTACTCTATATAAGGTT  
TTGCTATTCATTGAAAGCAGTAGTGACTGATTTGTATATA

>MinSyn\_1087|Strength:0.150171624

GCGTGTTCGTTTTAGTGAGGAGGTGGCTCTACGGCTCACTGCTTCCATCAACAAATAATCCAAGTAAG  
CTATCAGCTTCTCTCTGCCGACAGTGGTCCCAAATGAATGACGTAAGCCATGACGTCTACGCGGTA  
GGTCTGAAGATAAGATAATAATGTTGAAGATAAGAGCACCTCACATGTAGGCTATCAGAACCACGTCT  
ACAATGCCCAATTAGGTTGTCTTTATGACCCCGCCGATGACGCGGGAGCCTATGAGCTAAGCACATA  
CGTCAGGATGCTGATCTTGCCTGCCTCTATATAAGGTTTTGCTATTCATTGAAAGCAGTAGTGACTGA  
TTTGTATATA

>MinSyn\_1909|Strength:0.16568868

GCGTGTTCGTTTTAGTGAGGTTATGACCCCGCCGATGACGCGGGACCCAATTAGGTTGTCTGCACCTC  
TGACGTAAGGGATGACGCACAGAGGACCGATGCTGATCTTGTCTCAGAAGATCAAAGGGCTAACAAAAC  
TGGTACGTGGGAGCCACCAACGTCTCTCTGCCGACAGTGGTCCCAAATGTAGGCTATCAGCTTAGCAA  
GACCTCAAAAATGTCAAAGATACATGTAGGCTATCAGCTTAGCAATGACGTAAGCCATGACGTCTACC  
ACTATGCCCAATTAGGCTATATAAGGTTTTGCTATTCATTGAAAGCAGTAGTGACTGATTTGTATATA

>MinSyn\_1883|Strength:0.165916443

GCGTGTTCGTTTTAGTGAGGCAGCCACTTGTGTACATGTAGGCTGCTTTGTCAAAGCTAAAAAAGAT  
GATGCGGAGCTGACGTAAGGGATGACGCACAGTACAGGGCTTCCATCAACAAATAATCCAAGTAAGCA  
ATTAGGTTGTAGCAAGTGGATGAGGACCGATGCTGATCTTGCCTGCCTTAACCATTATTGCGGGTACT  
TAAGATTGATGAAAAGTCAAAAACAAAAATCAATTATTGTAGGCTATCAGCTTAATGACGTAAGCCAT  
GACGTCTACAAGACCTCTACAAAACCTATATAAGGTTTTGCTATTCATTGAAAGCAGTAGTGACTGAT  
TTGTATATA

>MinSyn\_1155|Strength:0.175773502

GCGTGTTCGTTTTAGTGAGGATGAGCTAAGCACATACGTCAGTTAGGTTGTCTGCACCTCATCACTATC  
AGCGTGAAGCATCTTCCCTCGCAGCCACTTGTGTCAAACCTGGTACTTGTGTACAGGGCTCAAATTTTCG  
GGAAACCTCCTCGTGCCTGCCTTGATGACGTAAGCCATGACGTCTACGATCTATATAAGGTTTTGCTA  
TTCATTGAAAGCAGTAGTGACTGATTTGTATATA

>MinSyn\_1044|Strength:0.176197104

GCGTGTTCGTTTTAGTGAGGTAAGCATCTTCCACCACTATGCCAATTAGGTTGTCTGCACATGAGCT  
AAGCACATACGTCAAGTCACGACCACTATGCCCGCTTTGTCAAAGCTAAAAAAGATGATGCACAGGG  
CTCACTGCTAGGAGGACCGAATCCTTACCGCTATGGGTAAGATTATGCTGATCTTGCCTGCCTTGATG  
ATTCTCTCTGCCGACAGTGGTCCCAAACAGGTGAAGATAAGATAATAATGTTGAAGATAAGAAATGA  
CGTAAGCCATGACGTCTAGCTCACTGCTAGGACTATATAAGGTTTTGCTATTCATTGAAAGCAGTAGT  
GACTGATTTGTATATA

>MinSyn\_1876|Strength:0.194464414

GCGTGTTCGTTTTAGTGAGGCTGACGTAAGGGATGACGCACACCACTATGCCAATTCAAATATTTCTT  
GTGAGATCCTTACCGCTATGGGTAAGATTGTCTGCACCTCACATGTAGGCTATCAGCTCACTATCAGC  
AAGACCTCTACAGCCACTTGTGTTGTTTTCAACAATCGCGGTAGGTCACGACCACTATGCCCAATTCA



## Supplementary Data File 8

Expression levels of MinSyns containing C-CREs in different locations relative to the TATA box.

C-CREs predicted to directly bind TGA TFs

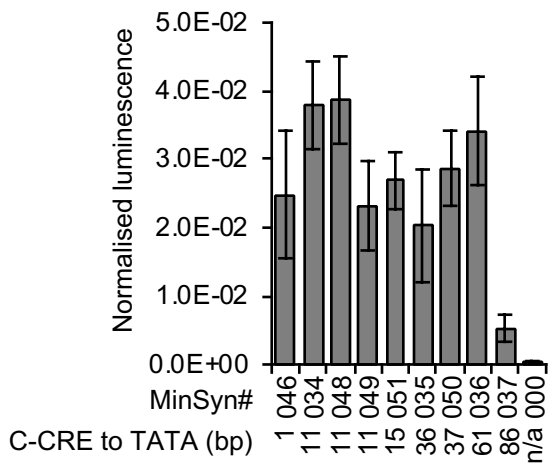

C-CREs predicted to indirectly bind TGA TFs

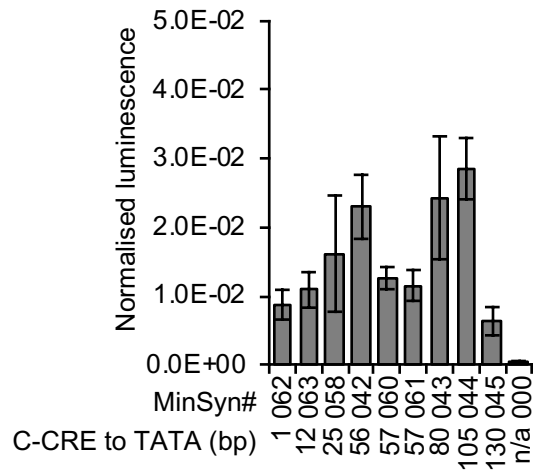

### Supplementary Data File 9

Transient expression in mesophyll protoplasts of *Hordeum vulgare* (barley). Both MinSyns and promoters from dicot-infecting viruses show minimal expression compared to the positive control (*Zea mays UBIQUITIN - ZmUbi*).

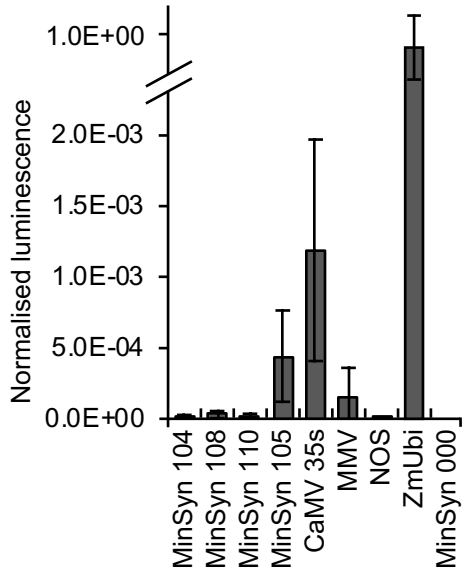

Supplement: gkaa682_supplemental_file.pdf [file gkaa682_supplemental_file.pdf]
